# Supplementary material for: Fluorous bispidine: a bifunctional reagent for copper-catalyzed oxidation and knoevenagel condensation reactions in water
Source: Royal Society of Chemistry journal article supplement (doi:10.1039/c5ra17093a), 2015-01-01

Supporting Information

**Fluorous Bispidine: A Bifunctional Reagent for Copper-catalyzed  
Oxidation and Knoevenagel Condensation Reaction in Water**

Wei Jie Ang, Yong Sheng Chng and Yulin Lam\*

Department of Chemistry, National University of Singapore, 3 Science Drive 3, Singapore  
117543, Singapore.

E-mail: chmlamyl@nus.edu.sg

**Content Page**

| Content                                                           | Page |
|-------------------------------------------------------------------|------|
| Product Characterization                                          | S2   |
| References                                                        | S9   |
| <sup>1</sup> H and <sup>13</sup> C NMR spectra of new compounds   | S10  |
| <sup>1</sup> H and <sup>13</sup> C NMR spectra of known compounds | S20  |

**Dimethyl 7-(4-methoxybenzyl)-3-methyl-9-oxo-2,4-di(pyridin-2-yl)-3,7-diazabicyclo[3.3.1]nonane-1,5-dicarboxylate (L1).** White solid. Mp: 188-189 °C. <sup>1</sup>H NMR (500 MHz, CDCl<sub>3</sub>) δ 8.43 (d, *J* = 3.2 Hz, 2H), 7.87 (d, *J* = 7.9 Hz, 2H), 7.49 (td, *J* = 7.7, 1.7 Hz, 2H), 7.26 (d, *J* = 8.5 Hz, 2H), 7.12 (dd, *J* = 6.8, 5.1 Hz, 2H), 6.93 (d, *J* = 8.5 Hz, 2H), 4.68 (s, 2H), 3.86 (s, 3H), 3.81 (s, 6H), 3.30 (s, 2H), 3.02 (d, *J* = 12.7 Hz, 2H), 2.50 (d, *J* = 12.2 Hz, 2H), 1.96 (s, 3H). <sup>13</sup>C NMR (126 MHz, CDCl<sub>3</sub>) δ 203.7, 168.5, 159.1, 158.5, 149.0, 136.0, 131.4, 129.0, 123.4, 122.8, 113.7, 73.7, 62.1, 61.6, 58.8, 55.4, 52.4, 43.2. HRMS (ESI): calcd for C<sub>30</sub>H<sub>33</sub>N<sub>4</sub>O<sub>6</sub> (M+H)<sup>+</sup> 545.2395, found 545.2403.

**(4-(4,4,5,5,6,6,7,7,8,8,9,9,10,10,11,11,11-Heptadecafluoroundecyloxy)phenyl)methanol (p2').** White solid. Mp: 83-84 °C. <sup>1</sup>H NMR (500 MHz, CDCl<sub>3</sub>) δ 7.29 (d, *J* = 8.7 Hz, 2H), 6.88 (d, *J* = 8.6 Hz, 2H), 4.61 (s, 2H), 4.04 (t, *J* = 5.9 Hz, 2H), 2.38 – 2.25 (m, 2H), 2.14 – 2.05 (m, 2H), 1.75 (s, 1H). <sup>13</sup>C NMR (126 MHz, CDCl<sub>3</sub>) δ 158.2, 133.5, 128.7, 114.5, 66.4, 65.0, 27.9 (t, *J* = 22.7 Hz), 20.6. HRMS (EI): calcd for C<sub>18</sub>H<sub>13</sub>F<sub>17</sub>O<sub>2</sub> (M<sup>+</sup>) 584.0639, found 584.0642.

**1-(Chloromethyl)-4-(4,4,5,5,6,6,7,7,8,8,9,9,10,10,11,11,11-heptadecafluoroundecyloxy)benzene (2).** White solid. Mp: 64-65 °C. <sup>1</sup>H NMR (500 MHz, CDCl<sub>3</sub>) δ 7.32 (d, *J* = 8.6 Hz, 2H), 6.88 (d, *J* = 8.6 Hz, 2H), 4.57 (s, 2H), 4.04 (t, *J* = 5.9 Hz, 2H), 2.38 – 2.24 (m, 2H), 2.14 – 2.07 (m, 2H). <sup>13</sup>C NMR (126 MHz, CDCl<sub>3</sub>) δ 158.7, 130.2, 130.1, 114.7, 66.4, 46.1, 27.9 (t, *J* = 22.8 Hz), 20.6. HRMS (EI): calcd for C<sub>18</sub>H<sub>12</sub>F<sub>17</sub>O<sub>1</sub><sup>35</sup>Cl<sub>1</sub> (M<sup>+</sup>) 602.0300, found 602.0306.

**Dimethyl 3-methyl-9-oxo-7-(4-(4,4,5,5,6,6,7,7,8,8,9,9,10,10,11,11,11-heptadecafluoroundecyloxy)benzyl)-2,4-di(pyridin-2-yl)-3,7-diazabicyclo[3.3.1]nonane-1,5-dicarboxylate (FL1).** Brown foamed solid. Mp: 74-75 °C. <sup>1</sup>H NMR (500 MHz, CDCl<sub>3</sub>) δ 8.43 (d, *J* = 4.0 Hz, 2H), 7.87 (d, *J* = 7.9 Hz, 2H), 7.49 (td, *J* = 7.7, 1.6 Hz, 2H), 7.26 (d, *J* = 8.5 Hz, 2H), 7.12 (dd, *J* = 6.9, 5.3 Hz, 2H), 6.91 (d, *J* = 8.5 Hz, 2H), 4.68 (s, 2H), 4.08 (t, *J* = 5.9 Hz, 2H), 3.80 (s, 6H), 3.32 (s, 2H), 3.04 (d, *J* = 12.5 Hz, 2H), 2.52 (d, *J* = 12.2 Hz, 2H), 2.41 – 2.31 (m, 2H), 2.16 (dd, *J* = 9.6, 5.7 Hz, 2H), 1.96 (s, 3H). <sup>13</sup>C NMR (126 MHz, CDCl<sub>3</sub>) δ 203.6, 168.5, 158.5, 158.1, 149.1, 136.0, 131.5, 129.4, 123.4, 122.8, 114.2, 73.7, 66.4, 62.1, 61.5, 58.7, 52.4, 43.2, 27.8 (t, *J* = 22.1 Hz), 20.6. HRMS (ESI): calcd for C<sub>40</sub>H<sub>36</sub>F<sub>17</sub>N<sub>4</sub>O<sub>6</sub> (M+H)<sup>+</sup> 991.2358, found 991.2351.

**Dimethyl 3-methyl-9-oxo-7-(3,3,4,4,5,5,6,6,7,7,8,8,9,9,10,10,10-heptadecafluorodecyl)-2,4-di(pyridin-2-yl)-3,7-diazabicyclo[3.3.1]nonane-1,5-dicarboxylate (FL2).** White solid. Mp: 176-177 °C. <sup>1</sup>H NMR (500 MHz, CDCl<sub>3</sub>) δ 8.52 (d, *J* = 4.6 Hz, 2H), 7.96 (d, *J* = 7.8 Hz, 2H), 7.75 (t, *J* = 7.6 Hz, 2H), 7.24 – 7.18 (m, 2H), 4.75 (s, 2H), 3.83 (s, 6H), 3.03 (d, *J* = 11.7 Hz, 2H), 2.66 (dd, *J* = 15.8, 9.3 Hz, 4H), 2.27 (td, *J* = 18.4, 9.1 Hz, 2H), 2.06 (s, 3H). <sup>13</sup>C NMR (126 MHz, CDCl<sub>3</sub>) δ 202.9, 168.5, 158.6, 149.5, 136.2, 123.3, 123.1, 73.5, 62.2, 58.3, 52.6, 48.1, 43.2, 28.3 (t, *J* = 22.3 Hz). HRMS (ESI): calcd for C<sub>32</sub>H<sub>28</sub>F<sub>17</sub>N<sub>4</sub>O<sub>5</sub> (M+H)<sup>+</sup> 871.1783, found 871.1791.

**9-Methoxy-1,5-diphenyl-3,7-bis(pyridin-2-ylmethyl)-3,7-diazabicyclo[3.3.1]nonane (L3).** Brown foamed solid. Mp: 126-127 °C. <sup>1</sup>H NMR (500 MHz, CDCl<sub>3</sub>) δ 8.40 (d, *J* = 4.8 Hz, 1H), 8.31 (d, *J* = 4.8 Hz, 1H), 7.69 (ddd, *J* = 14.0, 10.1, 4.6 Hz, 2H), 7.63 – 7.56 (m, 5H), 7.48 (d, *J* = 7.8 Hz, 1H), 7.31 (t, *J* = 7.8 Hz, 4H), 7.23 – 7.18 (m, 3H), 7.14 (dd, *J* = 7.3, 5.0 Hz, 1H), 4.61 (s, 2H), 4.54 (d, *J* = 11.7 Hz, 2H), 4.40 (s, 1H), 4.35 (s, 2H), 3.67 – 3.59 (m, 4H), 3.48 (d, *J* = 12.4 Hz, 2H), 2.45 (s, 3H). <sup>13</sup>C NMR (126 MHz, CDCl<sub>3</sub>) δ 154.3, 151.7, 149.3, 149.2, 138.7, 137.1, 137.1, 128.7, 127.5, 126.1, 124.0, 123.9, 123.2, 122.9, 83.6, 62.0, 61.2, 61.2, 59.3, 55.2, 43.1. HRMS (ESI): calcd for C<sub>32</sub>H<sub>35</sub>N<sub>4</sub>O (M+H)<sup>+</sup> 491.2805, found 491.2810.

**1,5-Diphenyl-9-(3,3,4,4,5,5,6,6,7,7,8,8,9,9,10,10,10-heptadecafluorodecyl)-3,7-bis(pyridin-2-ylmethyl)-3,7-diazabicyclo[3.3.1]nonane (FL3).** Brown foamed solid. Mp: 102-103 °C. <sup>1</sup>H NMR (500 MHz, CDCl<sub>3</sub>) δ 8.41 (d, *J* = 4.6 Hz, 1H), 8.31 (d, *J* = 4.7 Hz, 1H), 7.71 (td, *J* = 7.7, 1.6 Hz, 1H), 7.64 (d, *J* = 7.9 Hz, 6H), 7.46 (d, *J* = 7.8 Hz, 1H), 7.32 (t, *J* = 7.8 Hz, 4H), 7.20 (dd, *J* = 15.2, 7.6 Hz, 3H), 7.15 (dd, *J* = 7.0, 5.3 Hz, 1H), 4.84 (d, *J* = 11.3 Hz, 2H), 4.72 (s, 2H), 4.63 (s, 1H), 4.55 (t, *J* = 6.5 Hz, 1H), 4.48 (t, *J* = 6.5 Hz, 1H), 4.30 (s, 2H), 3.63 (d, *J* = 9.0 Hz, 2H), 3.54 (dd, *J* = 11.6, 5.4 Hz, 4H), 3.28 (d, *J* = 4.1 Hz, 2H). <sup>13</sup>C NMR (126 MHz, CDCl<sub>3</sub>) δ 154.8, 151.2, 149.3, 149.3, 138.5, 137.2, 137.1, 128.9, 127.8, 126.1, 123.9, 123.8, 123.3, 122.9, 84.5, 65.3, 65.3, 62.0, 60.9, 59.1, 55.2, 43.3. HRMS (ESI): calcd for C<sub>41</sub>H<sub>36</sub>F<sub>17</sub>N<sub>4</sub>O (M+H)<sup>+</sup> 923.2618, found 923.2620.

**4-Methoxybenzaldehyde (7a).** Colorless oil.  $^1\text{H}$  NMR (500 MHz,  $\text{CDCl}_3$ )  $\delta$  9.88 (s, 1H), 7.84 (d,  $J = 8.8$  Hz, 2H), 7.00 (d,  $J = 8.7$  Hz, 2H), 3.89 (s, 3H).  $^{13}\text{C}$  NMR (126 MHz,  $\text{CDCl}_3$ )  $\delta$  190.8, 164.6, 132.0, 130.0, 114.3, 55.6. HRMS (EI): calcd for  $\text{C}_8\text{H}_8\text{O}_2$  ( $\text{M}^+$ ) 136.0519, found 136.0515.

**Benzaldehyde (7b).** Colorless oil.  $^1\text{H}$  NMR (500 MHz,  $\text{CDCl}_3$ )  $\delta$  10.02 (s, 1H), 7.88 (dd,  $J = 8.1, 1.5$  Hz, 2H), 7.62 (tt,  $J = 6.9, 1.4$  Hz, 1H), 7.53 (t,  $J = 7.6$  Hz, 2H).  $^{13}\text{C}$  NMR (126 MHz,  $\text{CDCl}_3$ )  $\delta$  192.3, 136.4, 134.4, 129.7, 128.9. HRMS (EI): calcd for  $\text{C}_7\text{H}_6\text{O}$  ( $\text{M}^+$ ) 106.0419, found 106.0415.

**4-(Allyloxy)benzaldehyde (7c).** Colorless oil.  $^1\text{H}$  NMR (300 MHz,  $\text{CDCl}_3$ )  $\delta$  9.86 (s, 1H), 7.84 – 7.77 (m, 2H), 7.03 – 6.95 (m, 2H), 6.03 (ddt,  $J = 17.2, 10.5, 5.3$  Hz, 1H), 5.36 (ddq,  $J = 27.3, 10.5, 1.5$  Hz, 2H), 4.60 (dt,  $J = 5.3, 1.5$  Hz, 2H).  $^{13}\text{C}$  NMR (75 MHz,  $\text{CDCl}_3$ )  $\delta$  190.7, 163.5, 132.2, 131.9, 130.0, 118.2, 114.9, 68.9. HRMS (EI): calcd for  $\text{C}_{10}\text{H}_{10}\text{O}_2$  ( $\text{M}^+$ ) 162.0675, found 162.0682.

**4-Nitrobenzaldehyde (7d).** Yellow solid. Mp: 106-108  $^\circ\text{C}$  (lit.<sup>1</sup> mp 105-108  $^\circ\text{C}$ ).  $^1\text{H}$  NMR (500 MHz,  $\text{CDCl}_3$ )  $\delta$  10.16 (s, 1H), 8.39 (d,  $J = 8.5$  Hz, 2H), 8.08 (d,  $J = 8.3$  Hz, 2H).  $^{13}\text{C}$  NMR (126 MHz,  $\text{CDCl}_3$ )  $\delta$  190.2, 151.1, 140.0, 130.5, 124.3. HRMS (EI): calcd for  $\text{C}_7\text{H}_5\text{O}_3\text{N}$  ( $\text{M}^+$ ) 151.0264, found 151.0270.

**3,4-Dimethoxybenzaldehyde (7e).** Yellow oil.  $^1\text{H}$  NMR (500 MHz,  $\text{CDCl}_3$ )  $\delta$  9.81 (s, 1H), 7.41 (dd,  $J = 8.2, 1.8$  Hz, 1H), 7.36 (d,  $J = 1.8$  Hz, 1H), 6.94 (d,  $J = 8.2$  Hz, 1H), 3.92 (s, 3H), 3.89 (s, 3H).  $^{13}\text{C}$  NMR (126 MHz,  $\text{CDCl}_3$ )  $\delta$  190.7, 154.4, 149.5, 130.0, 126.7, 110.3, 108.9, 56.0, 55.8. HRMS (EI): calcd for  $\text{C}_9\text{H}_{10}\text{O}_3$  ( $\text{M}^+$ ) 166.0625, found 166.0631.

**2-Naphthaldehyde (7f).** Pale-yellow solid. Mp: 61-62  $^\circ\text{C}$  (lit.<sup>2</sup> mp 60-62  $^\circ\text{C}$ ).  $^1\text{H}$  NMR (500 MHz,  $\text{CDCl}_3$ )  $\delta$  10.28 (s, 1H), 8.45 (s, 1H), 8.07 (ddd,  $J = 20.7, 16.2, 8.0$  Hz, 4H), 7.74 (dt,  $J = 27.8, 7.1$  Hz, 2H).  $^{13}\text{C}$  NMR (126 MHz,  $\text{CDCl}_3$ )  $\delta$  190.2, 134.3, 132.4, 132.0, 130.5, 127.5, 127.0, 127.0, 126.0, 125.0, 120.6. HRMS (EI): calcd for  $\text{C}_{11}\text{H}_8\text{O}$  ( $\text{M}^+$ ) 156.0570, found 156.0574.

**4-tert-Butylbenzaldehyde (7g).** Yellow oil.  $^1\text{H}$  NMR (500 MHz,  $\text{CDCl}_3$ )  $\delta$  10.06 (s, 1H), 7.90 (d,  $J = 8.0$  Hz, 2H), 7.63 (d,  $J = 8.0$  Hz, 2H), 1.44 (s, 9H).  $^{13}\text{C}$  NMR (126 MHz,  $\text{CDCl}_3$ )  $\delta$  190.5, 156.9, 132.6, 128.2, 124.5, 33.8, 29.6. HRMS (EI): calcd for  $\text{C}_{11}\text{H}_{14}\text{O}$  ( $\text{M}^+$ ) 162.1039, found 162.1044.

**N-(4-Formylphenyl)acetamide (7h).** Off-white solid. Mp: 150-151  $^\circ\text{C}$  (lit.<sup>3</sup> mp 149-151  $^\circ\text{C}$ ).  $^1\text{H}$  NMR (500 MHz,  $\text{CDCl}_3$ )  $\delta$  9.90 (s, 1H), 8.27 (s, 1H), 7.82 (d,  $J = 8.6$  Hz, 2H), 7.72 (d,  $J = 8.2$  Hz, 2H), 2.22 (s, 3H).  $^{13}\text{C}$  NMR (126 MHz,  $\text{CDCl}_3$ )  $\delta$  191.2, 169.1, 143.8, 132.1, 131.1, 119.3, 24.7. HRMS (EI): calcd for  $\text{C}_9\text{H}_9\text{O}_2\text{N}$  ( $\text{M}^+$ ) 163.0628, found 163.0633.

**4-(Methylthio)benzaldehyde (7i).** Pale-yellow oil.  $^1\text{H}$  NMR (300 MHz,  $\text{CDCl}_3$ )  $\delta$  9.86 (s, 1H), 7.74 – 7.67 (m, 2H), 7.29 – 7.23 (m, 2H), 2.47 (s, 3H).  $^{13}\text{C}$  NMR (75 MHz,  $\text{CDCl}_3$ )  $\delta$  191.0, 147.7, 132.7, 129.8, 125.0, 14.4. HRMS (EI): calcd for  $\text{C}_8\text{H}_8\text{OS}$  ( $\text{M}^+$ ) 152.0290, found 152.0288.

**4-Hydroxybenzaldehyde (7j).** Off-white solid. Mp: 109-111  $^\circ\text{C}$  (lit.<sup>4</sup> mp 110-112  $^\circ\text{C}$ ).  $^1\text{H}$  NMR (500 MHz, MeOD)  $\delta$  9.76 (s, 1H), 7.77 (d,  $J = 8.6$  Hz, 2H), 6.91 (d,  $J = 8.6$  Hz, 2H), 4.91 (s, 1H).  $^{13}\text{C}$  NMR (126 MHz, MeOD)  $\delta$  192.8, 165.1, 133.4, 130.3, 116.9. HRMS (EI): calcd for  $\text{C}_7\text{H}_6\text{O}_2$  ( $\text{M}^+$ ) 122.0362, found 122.0361.

**4-Formylbenzoic acid (7k).** Off-white solid. Mp: 247-248  $^\circ\text{C}$  (lit.<sup>3</sup> mp 245-247  $^\circ\text{C}$ ).  $^1\text{H}$  NMR (500 MHz, DMSO)  $\delta$  13.39 (s, 1H), 10.11 (s, 1H), 8.13 (d,  $J = 7.7$  Hz, 2H), 8.02 (d,  $J = 8.0$  Hz, 2H).  $^{13}\text{C}$  NMR (126 MHz, DMSO)  $\delta$  193.0, 166.6, 138.9, 135.6, 129.9, 129.5. HRMS (EI): calcd for  $\text{C}_8\text{H}_6\text{O}_3$  ( $\text{M}^+$ ) 150.0312, found 150.0307.

**4-Chlorobenzaldehyde (7l).** Off-white solid. Mp: 42-44  $^\circ\text{C}$  (lit.<sup>2</sup> mp 43-45  $^\circ\text{C}$ ).  $^1\text{H}$  NMR (500 MHz,  $\text{CDCl}_3$ )  $\delta$  9.97 (s, 1H), 7.80 (d,  $J = 7.8$  Hz, 2H), 7.49 (d,  $J = 7.8$  Hz, 2H).  $^{13}\text{C}$  NMR (126 MHz,  $\text{CDCl}_3$ )  $\delta$  190.8, 140.9, 134.7, 130.8, 129.4. HRMS (EI): calcd for  $\text{C}_7\text{H}_4\text{O}^{35}\text{Cl}$  ( $\text{M}^+$ ) 138.9945, found 138.9951.

**2-Chlorobenzaldehyde (7m).** Colorless oil.  $^1\text{H}$  NMR (500 MHz,  $\text{CDCl}_3$ )  $\delta$  10.39 (s, 1H), 7.83 (dd,  $J = 7.7, 1.7$  Hz, 1H), 7.46 (td,  $J = 7.7, 1.8$  Hz, 1H), 7.37 (d,  $J = 8.0$  Hz, 1H), 7.31 (t,  $J = 7.9$  Hz, 1H).  $^{13}\text{C}$  NMR (126 MHz,  $\text{CDCl}_3$ )  $\delta$  189.5, 137.7, 134.9, 132.2, 130.4, 129.1, 127.1. HRMS (EI): calcd for  $\text{C}_7\text{H}_4\text{O}^{35}\text{Cl}$  ( $\text{M}^+$ ) 138.9945, found 138.9950.

**2-Bromobenzaldehyde (7n).** Yellow oil.  $^1\text{H}$  NMR (500 MHz,  $\text{CDCl}_3$ )  $\delta$  10.35 (s, 1H), 7.91 – 7.88 (m, 1H), 7.63 (dd,  $J = 7.4, 1.7$  Hz, 1H), 7.45 – 7.39 (m, 2H).  $^{13}\text{C}$  NMR (126 MHz,  $\text{CDCl}_3$ )  $\delta$  191.7, 135.3, 133.8, 133.5, 129.8, 127.8, 127.0. HRMS (EI): calcd for  $\text{C}_7\text{H}_4\text{O}^{79}\text{Br}$  ( $\text{M}^+$ ) 182.9440, found 182.9445.

**2-Iodobenzaldehyde (7o).** White solid. Mp: 30-31  $^\circ\text{C}$  (lit.<sup>5</sup> mp 30-31  $^\circ\text{C}$ ).  $^1\text{H}$  NMR (500 MHz,  $\text{CDCl}_3$ )  $\delta$  10.07 (s, 1H), 7.96 (d,  $J = 7.9$  Hz, 1H), 7.88 (dd,  $J = 7.7, 1.8$  Hz, 1H), 7.47 (t,  $J = 7.5$  Hz, 1H), 7.32 – 7.26 (m, 1H).  $^{13}\text{C}$  NMR (126 MHz,  $\text{CDCl}_3$ )  $\delta$  195.7, 140.6, 135.4, 135.1, 130.2, 128.7, 100.7. HRMS (EI): calcd for  $\text{C}_7\text{H}_5\text{O}^{127}\text{I}$  ( $\text{M}^+$ ) 231.9380, found 231.9383.

**2-Aminobenzaldehyde (7p).** Off-white solid. Mp: 36-37  $^\circ\text{C}$  (lit.<sup>6</sup> mp 35-36  $^\circ\text{C}$ ).  $^1\text{H}$  NMR (500 MHz,  $\text{CDCl}_3$ )  $\delta$  9.88 (s, 1H), 7.48 (d,  $J = 7.8$  Hz, 1H), 7.31 (dd,  $J = 8.3, 7.1$  Hz, 1H), 6.75 (t,  $J = 7.4$  Hz, 1H), 6.65 (d,  $J = 8.3$  Hz, 1H), 6.10 (s, 2H).  $^{13}\text{C}$  NMR (126 MHz,  $\text{CDCl}_3$ )  $\delta$  194.0, 149.8, 135.6, 135.1, 118.8, 116.3, 115.9. HRMS (EI): calcd for  $\text{C}_7\text{H}_7\text{NO}$  ( $\text{M}^+$ ) 121.0522, found 121.0528.

**Thiophene-2-carbaldehyde (7q).** Brown oil.  $^1\text{H}$  NMR (500 MHz,  $\text{CDCl}_3$ )  $\delta$  10.02 (s, 1H), 7.85 (dd,  $J = 12.1, 3.9$  Hz, 2H), 7.29 (t,  $J = 4.0$  Hz, 1H).  $^{13}\text{C}$  NMR (126 MHz,  $\text{CDCl}_3$ )  $\delta$  181.5, 142.6, 134.9, 133.8, 126.9. HRMS (EI): calcd for  $\text{C}_5\text{H}_4\text{O}^{32}\text{S}$  ( $\text{M}^+$ ) 111.9977, found 111.9976.

**1H-indole-3-carbaldehyde (7r).** Yellow solid. Mp: 192-193  $^\circ\text{C}$  (lit.<sup>7</sup> mp 190-192  $^\circ\text{C}$ ).  $^1\text{H}$  NMR (500 MHz, DMSO)  $\delta$  12.13 (s, 1H), 9.94 (s, 1H), 8.28 (s, 1H), 8.10 (d,  $J = 7.6$  Hz, 1H), 7.51 (d,  $J = 8.0$  Hz, 1H), 7.24 (dt,  $J = 14.8, 7.0$  Hz, 2H).  $^{13}\text{C}$  NMR (126 MHz, DMSO)  $\delta$  184.9, 138.4, 137.0, 124.1, 123.4, 122.1, 120.8, 118.2, 112.4. HRMS (EI): calcd for  $\text{C}_9\text{H}_7\text{NO}$  ( $\text{M}^+$ ) 145.0522, found 145.0526.

**5-Methylfuran-2-carbaldehyde (7s).** Pale-brown oil.  $^1\text{H}$  NMR (500 MHz,  $\text{CDCl}_3$ )  $\delta$  9.43 (s, 1H), 7.11 (d,  $J = 3.5$  Hz, 1H), 6.17 (d,  $J = 3.5$  Hz, 1H), 2.35 (s, 3H).  $^{13}\text{C}$  NMR (126 MHz,  $\text{CDCl}_3$ )  $\delta$  176.7, 159.6, 151.7, 123.7, 109.3, 13.8. HRMS (EI): calcd for  $\text{C}_6\text{H}_6\text{O}_2$  ( $\text{M}^+$ ) 110.0362, found 110.0363.

**Cinnamaldehyde (7t).** Pale-yellow oil.  $^1\text{H}$  NMR (300 MHz,  $\text{CDCl}_3$ )  $\delta$  9.68 (d,  $J = 7.7$  Hz, 1H), 7.58 – 7.50 (m, 2H), 7.50 – 7.37 (m, 4H), 6.70 (dd,  $J = 16.0, 7.7$  Hz, 1H).  $^{13}\text{C}$  NMR (75 MHz,  $\text{CDCl}_3$ )  $\delta$  193.5, 152.6, 133.9, 131.1, 129.0, 128.4, 128.4. HRMS (EI): calcd for  $\text{C}_9\text{H}_8\text{O}$  ( $\text{M}^+$ ) 132.0570, found 132.0572.

**Geranial (7u).** Yellow oil.  $^1\text{H}$  NMR (500 MHz,  $\text{CDCl}_3$ )  $\delta$  10.05 (d,  $J = 7.8$  Hz, 1H), 5.94 (d,  $J = 7.6$  Hz, 1H), 5.14 (t,  $J = 5.5$  Hz, 1H), 2.31-2.26 (m, 4H), 2.23 (s, 3H), 1.75 (s, 3H), 1.68 (s, 3H).  $^{13}\text{C}$  NMR (126 MHz,  $\text{CDCl}_3$ )  $\delta$  189.5, 161.9, 131.2, 125.8, 120.9, 39.0, 24.1, 24.0, 16.0, 16.0. HRMS (EI): calcd for  $\text{C}_{10}\text{H}_{16}\text{O}$  ( $\text{M}^+$ ) 152.1196, found 152.1194.

**Acetophenone (9a).** Colorless oil.  $^1\text{H}$  NMR (500 MHz,  $\text{CDCl}_3$ )  $\delta$  7.94 (dd,  $J = 8.3, 1.2$  Hz, 2H), 7.54 (t,  $J = 7.4$  Hz, 1H), 7.44 (t,  $J = 7.7$  Hz, 2H), 2.58 (s, 3H).  $^{13}\text{C}$  NMR (126 MHz,  $\text{CDCl}_3$ )  $\delta$  198.0, 137.0, 133.0, 128.4, 128.2, 26.5. HRMS (EI): calcd for  $\text{C}_8\text{H}_8\text{O}$  120.0575, found 120.0580.

**1-(4-Iodophenyl)ethanone (9b).** White solid. Mp: 82-83  $^\circ\text{C}$  (lit.<sup>8</sup> mp 83-84  $^\circ\text{C}$ ).  $^1\text{H}$  NMR (500 MHz,  $\text{CDCl}_3$ )  $\delta$  7.86 – 7.80 (m, 2H), 7.68 – 7.63 (m, 2H), 2.57 (s, 3H).  $^{13}\text{C}$  NMR (126 MHz,  $\text{CDCl}_3$ )  $\delta$  197.3, 137.9, 136.4, 129.7, 101.0, 26.4. HRMS (EI): calcd for  $\text{C}_8\text{H}_7\text{O}^{127}\text{I}$  ( $\text{M}^+$ ) 245.9536, found 245.9542.

**3-Acetylpyridine (9c).** Yellow oil.  $^1\text{H}$  NMR (500 MHz,  $\text{CDCl}_3$ )  $\delta$  9.09 (d,  $J = 1.8$  Hz, 1H), 8.70 (dd,  $J = 4.8, 1.7$  Hz, 1H), 8.15 (dt,  $J = 8.0, 2.0$  Hz, 1H), 7.35 (dd,  $J = 7.9, 4.8$  Hz, 1H), 2.57 (s, 3H).  $^{13}\text{C}$  NMR (126 MHz,  $\text{CDCl}_3$ )  $\delta$  196.5, 153.4, 149.8, 135.3, 132.1, 123.5, 26.5. HRMS (EI): calcd for  $\text{C}_7\text{H}_7\text{NO}$  ( $\text{M}^+$ ) 121.0522, found 121.0527.

**2-Acetylthiophene (9d).** Dark-yellow oil.  $^1\text{H}$  NMR (500 MHz,  $\text{CDCl}_3$ )  $\delta$  7.68 (d,  $J = 3.7$  Hz, 1H), 7.61 (d,  $J = 5.0$  Hz, 1H), 7.12 – 7.09 (m, 1H), 2.54 (s, 3H).  $^{13}\text{C}$  NMR (126 MHz,  $\text{CDCl}_3$ )  $\delta$  190.6, 144.5, 133.7, 132.4, 128.0, 26.8. HRMS (EI): calcd for  $\text{C}_6\text{H}_6\text{O}^{32}\text{S}$  ( $\text{M}^+$ ) 126.0134, found 126.0136

**4-(1-Hydroxyethyl)benzaldehyde (7v).** Pale-yellow oil.  $^1\text{H}$  NMR (500 MHz,  $\text{CDCl}_3$ )  $\delta$  9.94 (s, 1H), 7.82 (d,  $J = 8.2$  Hz, 2H), 7.51 (d,  $J = 8.1$  Hz, 2H), 4.95 (q,  $J = 6.5$  Hz, 1H), 2.59 (s, 1H), 1.49 (d,  $J = 6.5$  Hz, 3H).  $^{13}\text{C}$  NMR (126 MHz,  $\text{CDCl}_3$ )  $\delta$  192.0, 152.8, 135.4, 129.9, 125.8, 69.7, 25.2. HRMS (EI): calcd for  $\text{C}_9\text{H}_{10}\text{O}_2$  ( $\text{M}^+$ ) 150.0675, found 150.0676.

**4-Acetylbenzaldehyde (7v').** Pale-yellow oil.  $^1\text{H}$  NMR (500 MHz,  $\text{CDCl}_3$ )  $\delta$  10.12 (s, 1H), 8.11 (d,  $J = 7.9$  Hz, 2H), 7.99 (d,  $J = 7.1$  Hz, 2H), 2.67 (s, 3H). HRMS (EI): calcd for  $\text{C}_9\text{H}_8\text{O}_2$  ( $\text{M}^+$ ) 148.0519, found 148.0524.

**4-(3-Hydroxypropyl)benzaldehyde (7w).** Pale-yellow oil.  $^1\text{H}$  NMR (500 MHz,  $\text{CDCl}_3$ )  $\delta$  9.93 (s, 1H), 7.77 (d,  $J = 8.1$  Hz, 2H), 7.34 (d,  $J = 8.0$  Hz, 2H), 3.66 (t,  $J = 6.3$  Hz, 2H), 2.80 – 2.75 (m, 2H), 2.12 (s, 1H), 1.90 (tt,  $J = 12.9, 6.4$  Hz, 2H).  $^{13}\text{C}$  NMR (126 MHz,  $\text{CDCl}_3$ )  $\delta$  192.1, 149.5, 134.4, 129.9, 129.1, 61.7, 33.6, 32.2. HRMS (EI): calcd for  $\text{C}_{10}\text{H}_{12}\text{O}_2$  ( $\text{M}^+$ ) 164.0832, found 164.0834.

**4-(3-Oxopropyl)benzaldehyde (7w').** Pale-yellow oil.  $^1\text{H}$  NMR (500 MHz,  $\text{CDCl}_3$ )  $\delta$  9.98 (s, 1H), 9.83 (s, 1H), 7.82 (d,  $J = 8.0$  Hz, 2H), 7.37 (d,  $J = 8.0$  Hz, 2H), 3.04 (t,  $J = 7.4$  Hz, 2H), 2.84 (t,  $J = 7.4$  Hz, 2H). HRMS (EI): calcd for  $\text{C}_{10}\text{H}_{10}\text{O}_2$  ( $\text{M}^+$ ) 162.0675, found 162.0677.

**3-Phenylcyclohex-2-enone (11a).** Pale yellow oil.  $^1\text{H}$  NMR (500 MHz,  $\text{CDCl}_3$ )  $\delta$  7.53 (dd,  $J = 6.7, 3.1$  Hz, 2H), 7.43 – 7.39 (m, 3H), 6.42 (s, 1H), 2.80 – 2.74 (m, 2H), 2.48 (d,  $J = 7.0$  Hz, 2H), 2.15 (dd,  $J = 12.8, 6.4$  Hz, 2H).  $^{13}\text{C}$  NMR (126 MHz,  $\text{CDCl}_3$ )  $\delta$  199.8, 159.8, 138.8, 129.9, 128.7, 126.1, 125.4, 37.2, 28.1, 22.8. HRMS (EI): calcd for  $\text{C}_{12}\text{H}_{12}\text{O}$  172.0888, found 172.0895.

**3-Methylcyclohex-2-enone (11b).** Pale yellow oil.  $^1\text{H}$  NMR (300 MHz,  $\text{CDCl}_3$ )  $\delta$  5.88 (d,  $J = 1.2$  Hz, 1H), 2.38 – 2.31 (m, 2H), 2.28 (t,  $J = 6.2$  Hz, 2H), 2.04 – 1.97 (m, 2H), 1.96 (s, 3H).  $^{13}\text{C}$  NMR (75 MHz,  $\text{CDCl}_3$ )  $\delta$  199.8, 162.8, 126.7, 37.0, 30.9, 24.4, 22.5. HRMS (EI): calcd for  $\text{C}_7\text{H}_{10}\text{O}$  110.0732, found 110.0730.

**3-Oxocyclohex-1-enecarbonitrile (11c).** Yellow oil.  $^1\text{H}$  NMR (500 MHz,  $\text{CDCl}_3$ )  $\delta$  6.51 (s, 1H), 2.56 (td,  $J = 6.0, 1.9$  Hz, 2H), 2.52 – 2.48 (m, 2H), 2.13 (td,  $J = 12.3, 6.1$  Hz, 2H).  $^{13}\text{C}$  NMR (126 MHz,  $\text{CDCl}_3$ )  $\delta$  196.3, 138.6, 130.9, 116.9, 37.2, 27.6, 22.0. HRMS (EI): calcd for  $\text{C}_7\text{H}_7\text{NO}$  121.0528, found 121.0528.

**3-Acetylcyclohex-2-enone (11d).** Pale yellow solid. Mp: 46-47  $^\circ\text{C}$  (lit.<sup>9</sup> mp 48-49  $^\circ\text{C}$ ).  $^1\text{H}$  NMR (500 MHz,  $\text{CDCl}_3$ )  $\delta$  6.58 (t,  $J = 1.7$  Hz, 1H), 2.51 (td,  $J = 6.1, 1.7$  Hz, 2H), 2.49 – 2.45 (m, 2H), 2.40 (s, 3H), 2.03 (dt,  $J = 12.4, 6.1$  Hz, 2H).  $^{13}\text{C}$  NMR (126 MHz,  $\text{CDCl}_3$ )  $\delta$  201.4, 200.0, 154.6, 132.4, 37.9, 26.1, 23.4, 21.9. HRMS (EI): calcd for  $\text{C}_8\text{H}_{10}\text{O}_2$  ( $\text{M}^+$ ) 138.0675, found 138.0676.

**3-Acetylcyclopent-2-enone (11e).** Pale yellow solid. Mp: 58-59  $^\circ\text{C}$  (lit.<sup>10</sup> mp 57.5-58.5  $^\circ\text{C}$ ).  $^1\text{H}$  NMR (500 MHz,  $\text{CDCl}_3$ )  $\delta$  6.64 (t,  $J = 2.0$  Hz, 1H), 2.82 – 2.78 (m, 2H), 2.54 – 2.51 (m, 2H), 2.49 (s, 3H).  $^{13}\text{C}$  NMR (126 MHz,  $\text{CDCl}_3$ )  $\delta$  210.1, 197.1, 169.1, 137.0, 35.4, 27.7, 26.3. HRMS (EI): calcd for  $\text{C}_7\text{H}_8\text{O}_2$  ( $\text{M}^+$ ) 124.0519, found 124.0521.

**1-Phenylhexan-1-one (11f).** Pale yellow oil.  $^1\text{H}$  NMR (500 MHz,  $\text{CDCl}_3$ )  $\delta$  7.96 (dd,  $J = 8.3, 1.2$  Hz, 2H), 7.55 (d,  $J = 7.3$  Hz, 2H), 7.45 (t,  $J = 7.7$  Hz, 2H), 2.99 – 2.92 (m, 2H), 1.74 (dq,  $J = 14.8, 7.4$  Hz, 2H), 1.37 (td,  $J = 7.2, 3.6$  Hz, 4H), 0.91 (t,  $J = 7.1$  Hz, 3H).  $^{13}\text{C}$  NMR (126 MHz,  $\text{CDCl}_3$ )  $\delta$  200.5, 137.1, 132.8, 128.5, 128.0, 38.5, 31.5, 24.0, 22.5, 13.9. HRMS (EI): calcd for  $\text{C}_{12}\text{H}_{16}\text{O}$  176.1201, found 176.1206.

**2,3-Dihydro-1H-inden-1-one (11g).** Brown solid. Mp: 41-42  $^\circ\text{C}$  (lit.<sup>11</sup> mp 40-42  $^\circ\text{C}$ ).  $^1\text{H}$  NMR (300 MHz,  $\text{CDCl}_3$ )  $\delta$  7.76 (d,  $J = 7.7$  Hz, 1H), 7.61 – 7.53 (m, 1H), 7.48 (d,  $J = 7.7$  Hz, 1H), 7.37 (t,  $J = 7.4$  Hz, 1H), 3.18 – 3.11 (m, 2H), 2.73 – 2.67 (m, 2H).  $^{13}\text{C}$  NMR (75 MHz,  $\text{CDCl}_3$ )  $\delta$  207.1, 155.2, 137.1, 134.6, 127.3, 126.7, 123.7, 36.2, 25.8. HRMS (EI): calcd for  $\text{C}_9\text{H}_8\text{O}$  132.0575, found 132.0570.

**9H-Fluoren-9-one (11h).** Yellow solid. Mp: 84-85 °C (lit.<sup>11</sup> mp 84-86 °C). <sup>1</sup>H NMR (500 MHz, CDCl<sub>3</sub>) δ 7.65 (d, *J* = 7.4 Hz, 2H), 7.48 (ddd, *J* = 10.0, 8.5, 4.2 Hz, 4H), 7.28 (td, *J* = 7.3, 1.3 Hz, 2H). <sup>13</sup>C NMR (126 MHz, CDCl<sub>3</sub>) δ 193.9, 144.4, 134.6, 134.1, 129.0, 124.3, 120.3. HRMS (EI): calcd for C<sub>13</sub>H<sub>8</sub>O 180.0575, found 180.0575.

**Methyl 2-oxo-2-phenylacetate (11i).** Yellow oil. <sup>1</sup>H NMR (500 MHz, CDCl<sub>3</sub>) δ 8.02 (dd, *J* = 8.3, 1.1 Hz, 2H), 7.67 (t, *J* = 7.5 Hz, 1H), 7.52 (t, *J* = 7.9 Hz, 2H), 3.98 (s, 3H). <sup>13</sup>C NMR (126 MHz, CDCl<sub>3</sub>) δ 186.0, 164.0, 135.0, 132.4, 130.1, 128.9, 52.8. HRMS (EI): calcd for C<sub>9</sub>H<sub>8</sub>O<sub>3</sub> 164.0473, found 164.0481.

**Isochroman-1-one (11j).** Brown oil. <sup>1</sup>H NMR (500 MHz, CDCl<sub>3</sub>) δ 8.06 (d, *J* = 7.8 Hz, 1H), 7.52 (td, *J* = 7.5, 1.4 Hz, 1H), 7.37 (t, *J* = 7.5 Hz, 1H), 7.25 (d, *J* = 7.7 Hz, 1H), 4.53 – 4.49 (m, 2H), 3.04 (t, *J* = 6.0 Hz, 2H). <sup>13</sup>C NMR (126 MHz, CDCl<sub>3</sub>) δ 165.0, 139.5, 133.6, 130.2, 127.6, 127.2, 125.2, 67.2, 27.7. HRMS (EI): calcd for C<sub>9</sub>H<sub>8</sub>O<sub>2</sub> 148.0524, found 148.0523.

**1-Tosyl-2,3-dihydroquinolin-4(1H)-one (11k).** Brown solid. Mp: 140-141 °C (lit.<sup>12</sup> mp 141 °C). <sup>1</sup>H NMR (500 MHz, CDCl<sub>3</sub>) δ 7.94 (dd, *J* = 7.8, 1.3 Hz, 1H), 7.86 (d, *J* = 8.4 Hz, 1H), 7.59 – 7.53 (m, 3H), 7.26 (dd, *J* = 8.2, 7.0 Hz, 1H), 7.22 (d, *J* = 8.2 Hz, 2H), 4.23 (t, *J* = 6.5 Hz, 2H), 2.40 – 2.36 (m, 5H). <sup>13</sup>C NMR (126 MHz, CDCl<sub>3</sub>) δ 192.7, 144.5, 142.3, 136.8, 134.7, 130.1, 127.7, 126.8, 125.7, 125.6, 124.5, 46.2, 36.5, 21.6. HRMS (EI): calcd for C<sub>16</sub>H<sub>15</sub>NO<sub>3</sub>S 301.0773, found 301.0772.

**N-(tert-Butyl)benzamide (11l).** Brown solid. Mp: 133-134 °C (lit.<sup>13</sup> mp 134-136 °C). <sup>1</sup>H NMR (300 MHz, CDCl<sub>3</sub>) δ 7.74 – 7.68 (m, 2H), 7.50 – 7.36 (m, 3H), 5.95 (s, 1H), 1.47 (s, 9H). <sup>13</sup>C NMR (75 MHz, CDCl<sub>3</sub>) δ 166.9, 135.9, 131.0, 128.4, 126.7, 51.6, 28.8. HRMS (EI): calcd for C<sub>11</sub>H<sub>15</sub>NO (M<sup>+</sup>) 177.1148, found 177.1155.

**3-tert-Butylperoxy-1-phenylcyclohexene (11a').** Pale yellow oil. <sup>1</sup>H NMR (300 MHz, CDCl<sub>3</sub>) δ 7.66 – 7.60 (m, 2H), 7.44 – 7.39 (m, 3H), 6.42 (s, 1H), 5.11 (t, *J* = 2.8 Hz, 1H), 2.89 – 2.66 (m, 2H), 2.47 (dd, *J* = 5.6, 1.8 Hz, 1H), 2.42 (d, *J* = 4.8 Hz, 1H), 2.17 – 2.03 (m, 2H), 1.21 (s, 9H). <sup>13</sup>C NMR (75 MHz, CDCl<sub>3</sub>) δ 163.2, 146.4, 130.0, 128.7, 128.4, 126.8, 80.2, 75.6, 32.4, 26.5, 26.1, 25.7.

**2-Benzylidenemalononitrile (13a).** White solid. Mp: 81-82 °C (lit.<sup>14</sup> mp 82-83 °C). <sup>1</sup>H NMR (500 MHz, CDCl<sub>3</sub>) δ 7.91 (d, *J* = 7.6 Hz, 2H), 7.79 (s, 1H), 7.64 (t, *J* = 7.5 Hz, 1H), 7.54 (t, *J* = 7.8 Hz, 2H). <sup>13</sup>C NMR (126 MHz, CDCl<sub>3</sub>) δ 159.9, 134.5, 130.8, 130.6, 129.5, 113.6, 112.5, 82.7. HRMS (EI): calcd for C<sub>10</sub>H<sub>6</sub>N<sub>2</sub> (M<sup>+</sup>) 154.0526, found 154.0532.

**2-(4-Methoxybenzylidene)malononitrile (13b).** Yellow solid. Mp: 112-113 °C (lit.<sup>15</sup> mp 114 °C). <sup>1</sup>H NMR (500 MHz, CDCl<sub>3</sub>) δ 7.90 (d, *J* = 8.9 Hz, 2H), 7.64 (s, 1H), 7.00 (d, *J* = 9.0 Hz, 2H), 3.91 (s, 3H). <sup>13</sup>C NMR (126 MHz, CDCl<sub>3</sub>) δ 164.7, 158.8, 133.4, 123.9, 115.0, 114.4, 113.3, 78.3, 55.7. HRMS (EI): calcd for C<sub>11</sub>H<sub>8</sub>N<sub>2</sub>O (M<sup>+</sup>) 184.0631, found 184.0636.

**2-(4-Nitrobenzylidene)malononitrile (13c).** Pale yellow solid. Mp: 161-162 °C (lit.<sup>14</sup> mp 160-161 °C). <sup>1</sup>H NMR (500 MHz, CDCl<sub>3</sub>) δ 8.38 (d, *J* = 8.8 Hz, 2H), 8.08 (d, *J* = 8.8 Hz, 2H), 7.90 (s, 1H). <sup>13</sup>C NMR (126 MHz, CDCl<sub>3</sub>) δ 156.9, 150.3, 135.8, 131.3, 124.6, 112.6, 111.6, 87.5. HRMS (EI): calcd for C<sub>10</sub>H<sub>5</sub>N<sub>3</sub>O<sub>2</sub> (M<sup>+</sup>) 199.0376, found 199.0381.

**2-(4-Chlorobenzylidene)malononitrile (13d).** White solid. Mp: 161-162 °C (lit.<sup>14</sup> mp 161-162 °C). <sup>1</sup>H NMR (500 MHz, CDCl<sub>3</sub>) δ 7.85 (d, *J* = 8.6 Hz, 2H), 7.74 (s, 1H), 7.52 (d, *J* = 8.6 Hz, 2H). <sup>13</sup>C NMR (126 MHz, CDCl<sub>3</sub>) δ 158.3, 141.1, 131.8, 130.0, 129.2, 113.4, 112.3, 83.3. HRMS (EI): calcd for C<sub>10</sub>H<sub>5</sub>N<sub>2</sub><sup>35</sup>Cl (M<sup>+</sup>) 188.0136, found 188.0142.

**2-(4-Ethylbenzylidene)malononitrile (13e).** White solid. Mp: 131-132 °C. <sup>1</sup>H NMR (500 MHz, CDCl<sub>3</sub>) δ 7.84 (d, *J* = 8.3 Hz, 2H), 7.73 (s, 1H), 7.36 (d, *J* = 8.3 Hz, 2H), 2.75 (q, *J* = 7.6 Hz, 2H), 1.27 (t, *J* = 7.6 Hz, 3H). <sup>13</sup>C NMR (126 MHz, CDCl<sub>3</sub>) δ 159.9, 152.5, 131.1, 129.2, 128.7, 114.1, 112.9, 81.2, 29.2, 14.9. HRMS (EI): calcd for C<sub>12</sub>H<sub>10</sub>N<sub>2</sub> (M<sup>+</sup>) 182.0839, found 182.0844.

**2-(Benzo[d][1,3]dioxol-5-ylmethylene)malononitrile (13f).** Yellow solid. Mp: 197-198 °C (lit.<sup>16</sup> mp 196-197 °C). <sup>1</sup>H NMR (500 MHz, CDCl<sub>3</sub>) δ 7.60 (s, 2H), 7.32 (d, *J* = 8.2 Hz, 1H), 6.93 (d, *J* = 8.2 Hz, 1H), 6.13 (s, 2H). <sup>13</sup>C NMR (126 MHz, CDCl<sub>3</sub>) δ 158.7, 153.5, 149.0, 130.0, 125.6, 114.2, 113.1, 109.1, 108.2, 102.7, 79.2. HRMS (EI): calcd for C<sub>11</sub>H<sub>6</sub>N<sub>2</sub>O<sub>2</sub> (M<sup>+</sup>) 198.0424, found 198.0421.

**2-(4-Hydroxybenzylidene)malononitrile (13g).** Yellow solid. Mp: 185-186 °C (lit.<sup>14</sup> mp 186-188 °C). <sup>1</sup>H NMR (500 MHz, MeOD) δ 7.90 (s, 1H), 7.86 (d, *J* = 8.8 Hz, 2H), 6.90 (d, *J* = 8.8 Hz, 2H), 4.93 (s, 1H). <sup>13</sup>C NMR (126 MHz, MeOD) δ 165.3, 161.0, 135.0, 124.5, 117.5, 115.9, 114.9, 77.3. HRMS (EI): calcd for C<sub>10</sub>H<sub>6</sub>N<sub>2</sub>O (M<sup>+</sup>) 170.0475, found 170.0481.

**2-(2-Chlorobenzylidene)malononitrile (13h).** White solid. Mp: 92-93 °C (lit.<sup>15</sup> mp 94 °C). <sup>1</sup>H NMR (500 MHz, CDCl<sub>3</sub>) δ 8.26 (s, 1H), 8.17 (d, *J* = 7.7 Hz, 1H), 7.55 (d, *J* = 3.8 Hz, 2H), 7.48 – 7.42 (m, 1H). <sup>13</sup>C NMR (126 MHz, CDCl<sub>3</sub>) δ 156.0, 136.2, 135.0, 130.6, 129.4, 129.0, 127.7, 113.1, 111.8, 85.7. HRMS (EI): calcd for C<sub>10</sub>H<sub>5</sub>N<sub>2</sub><sup>35</sup>Cl (M<sup>+</sup>) 188.0136, found 188.0132.

**2-(3-Cyanobenzylidene)malononitrile (13i).** White solid. Mp: 150-151 °C (lit.<sup>16</sup> mp 150 °C). <sup>1</sup>H NMR (500 MHz, CDCl<sub>3</sub>) δ 8.20 (d, *J* = 7.9 Hz, 1H), 8.08 (s, 1H), 7.90 (d, *J* = 7.8 Hz, 1H), 7.81 (s, 1H), 7.71 (t, *J* = 7.9 Hz, 1H). <sup>13</sup>C NMR (126 MHz, CDCl<sub>3</sub>) δ 157.0, 136.8, 133.9, 133.5, 131.7, 130.7, 116.9, 114.4, 112.7, 111.6, 86.3. HRMS (EI): calcd for C<sub>11</sub>H<sub>5</sub>N<sub>3</sub> (M<sup>+</sup>) 179.0478, found 179.0482.

**2-((1*H*-Indol-3-yl)methylene)malononitrile (13j).** Yellow solid. Mp: 222-223 °C (lit.<sup>17</sup> mp 223-224 °C). <sup>1</sup>H NMR (500 MHz, DMSO) δ 12.71 (s, 1H), 8.67 (s, 1H), 8.51 (s, 1H), 8.03 (d, *J* = 7.1 Hz, 1H), 7.57 (d, *J* = 7.4 Hz, 1H), 7.33 – 7.25 (m, 2H). <sup>13</sup>C NMR (126 MHz, DMSO) δ 152.5, 136.2, 133.3, 126.7, 123.9, 122.6, 119.0, 115.9, 115.9, 113.0, 111.0, 69.3. HRMS (EI): calcd for C<sub>12</sub>H<sub>7</sub>N<sub>3</sub> (M<sup>+</sup>) 193.0635, found 193.0640.

**2-(Thiophen-2-ylmethylene)malononitrile (13k).** Yellow solid. Mp: 93-94 °C (lit.<sup>18</sup> mp 91-92 °C). <sup>1</sup>H NMR (500 MHz, CDCl<sub>3</sub>) δ 7.88 (d, *J* = 3.4 Hz, 2H), 7.80 (d, *J* = 3.6 Hz, 1H), 7.29 – 7.25 (m, 1H). <sup>13</sup>C NMR (126 MHz, CDCl<sub>3</sub>) δ 151.1, 138.2, 136.9, 135.3, 129.0, 113.7, 112.9, 78.1. HRMS (EI): calcd for C<sub>8</sub>H<sub>4</sub>N<sub>2</sub><sup>32</sup>S (M<sup>+</sup>) 160.0090, found 160.0096.

**2-(Furan-2-ylmethylene)malononitrile (13l).** Yellow solid. Mp: 71-72 °C (lit.<sup>19</sup> mp 72-73 °C). <sup>1</sup>H NMR (500 MHz, CDCl<sub>3</sub>) δ 7.80 (s, 1H), 7.51 (s, 1H), 7.35 (d, *J* = 3.2 Hz, 1H), 6.72 – 6.68 (m, 1H). <sup>13</sup>C NMR (126 MHz, CDCl<sub>3</sub>) δ 149.5, 148.0, 143.0, 123.5, 114.4, 113.7, 112.5, 77.4. HRMS (EI): calcd for C<sub>8</sub>H<sub>4</sub>N<sub>2</sub>O (M<sup>+</sup>) 144.0318, found 144.0322.

**(*E*)-2-(3-Phenylallylidene)malononitrile (13m).** Yellow solid. Mp: 121-122 °C (lit.<sup>20</sup> mp 121-122 °C). <sup>1</sup>H NMR (500 MHz, CDCl<sub>3</sub>) δ 7.63 – 7.57 (m, 3H), 7.51 – 7.43 (m, 3H), 7.32 – 7.22 (m, 2H). <sup>13</sup>C NMR (126 MHz, CDCl<sub>3</sub>) δ 160.0, 150.4, 133.9, 132.0, 129.3, 128.9, 122.2, 113.5, 111.6, 82.8. HRMS (EI): calcd for C<sub>12</sub>H<sub>8</sub>N<sub>2</sub> (M<sup>+</sup>) 180.0682, found 180.0685.

**2-(2,2-Dimethylpropylidene)malononitrile (13n).** White solid. Mp: 63-64 °C (lit.<sup>21</sup> mp 64-65 °C). <sup>1</sup>H NMR (500 MHz, CDCl<sub>3</sub>) δ 7.21 (s, 1H), 1.30 (s, 9H). <sup>13</sup>C NMR (126 MHz, CDCl<sub>3</sub>) δ 177.5, 113.0, 111.0, 86.7, 36.9, 28.4. HRMS (EI): calcd for C<sub>8</sub>H<sub>10</sub>N<sub>2</sub> (M<sup>+</sup>) 134.0839, found 134.0835.

**2-(1-Phenylethylidene)malononitrile (13o).** White solid. Mp: 92-93 °C (lit.<sup>22</sup> mp 92 °C). <sup>1</sup>H NMR (500 MHz, CDCl<sub>3</sub>) δ 7.55 (dd, *J* = 6.5, 2.4 Hz, 3H), 7.51 (d, *J* = 6.1 Hz, 2H), 2.64 (s, 3H). <sup>13</sup>C NMR (126 MHz, CDCl<sub>3</sub>) δ 175.4, 135.9, 132.2, 129.1, 127.3, 112.7, 112.7, 84.7, 24.2. HRMS (EI): calcd for C<sub>11</sub>H<sub>8</sub>N<sub>2</sub> (M<sup>+</sup>) 168.0682, found 168.0687.

**2-Cyclohexylidenemalononitrile (13p).** Colorless oil.  $^1\text{H}$  NMR (500 MHz,  $\text{CDCl}_3$ )  $\delta$  2.68 – 2.62 (m, 4H), 1.80 (dt,  $J = 12.3, 6.0$  Hz, 4H), 1.68 (ddd,  $J = 7.8, 5.8, 4.0$  Hz, 2H).  $^{13}\text{C}$  NMR (126 MHz,  $\text{CDCl}_3$ )  $\delta$  184.9, 111.6, 82.5, 34.7, 27.9, 25.0. HRMS (EI): calcd for  $\text{C}_9\text{H}_{10}\text{N}_2$  ( $\text{M}^+$ ) 146.0839, found 146.0839.

**Ethyl 2-cyano-3-phenylacrylate (13q).** White solid. Mp: 45-46  $^\circ\text{C}$  (lit.<sup>20</sup> mp 46-47  $^\circ\text{C}$ ).  $^1\text{H}$  NMR (500 MHz,  $\text{CDCl}_3$ )  $\delta$  8.23 (s, 1H), 7.97 (d,  $J = 7.4$  Hz, 2H), 7.56 – 7.52 (m, 1H), 7.48 (dd,  $J = 8.1, 6.8$  Hz, 2H), 4.37 (q,  $J = 7.1$  Hz, 2H), 1.38 (t,  $J = 7.1$  Hz, 3H).  $^{13}\text{C}$  NMR (126 MHz,  $\text{CDCl}_3$ )  $\delta$  162.4, 154.9, 133.2, 131.4, 131.0, 129.2, 115.4, 102.9, 62.6, 14.1. HRMS (EI): calcd for  $\text{C}_{12}\text{H}_{11}\text{NO}_2$  ( $\text{M}^+$ ) 201.0784, found 201.0788.

**N-Butyl-2-cyano-3-phenylacrylamide (13r).** White solid. Mp: 78-79  $^\circ\text{C}$  (lit.<sup>23</sup> mp 79.2-80.2  $^\circ\text{C}$ ).  $^1\text{H}$  NMR (500 MHz,  $\text{CDCl}_3$ )  $\delta$  8.33 (s, 1H), 7.92 (d,  $J = 7.1$  Hz, 2H), 7.55 – 7.45 (m, 3H), 6.39 (s, 1H), 3.43 (dd,  $J = 13.5, 6.6$  Hz, 2H), 1.62 – 1.56 (m, 2H), 1.45 – 1.36 (m, 2H), 0.96 (t,  $J = 7.4$  Hz, 3H).  $^{13}\text{C}$  NMR (126 MHz,  $\text{CDCl}_3$ )  $\delta$  160.1, 152.8, 132.6, 131.8, 130.5, 129.2, 117.1, 104.1, 40.3, 31.4, 20.0, 13.7. HRMS (EI): calcd for  $\text{C}_{14}\text{H}_{16}\text{N}_2\text{O}$  ( $\text{M}^+$ ) 228.1257, found 228.1254.

**2-Benzylidene-4,4-dimethyl-3-oxopentenenitrile (13s).** White solid. Mp: 70-71  $^\circ\text{C}$  (lit.<sup>24</sup> mp 69-72  $^\circ\text{C}$ ).  $^1\text{H}$  NMR (500 MHz,  $\text{CDCl}_3$ )  $\delta$  8.21 (s, 1H), 7.98 (d,  $J = 7.5$  Hz, 2H), 7.55 – 7.45 (m, 3H), 1.42 (s, 9H).  $^{13}\text{C}$  NMR (126 MHz,  $\text{CDCl}_3$ )  $\delta$  198.1, 156.1, 132.9, 132.0, 131.1, 129.1, 118.2, 107.3, 44.5, 26.4. HRMS (EI): calcd for  $\text{C}_{14}\text{H}_{15}\text{NO}$  ( $\text{M}^+$ ) 213.1148, found 213.1144.

**2-(3-Nitrophenyl)-3-phenylacrylonitrile (13t).** Pale yellow solid. Mp: 167-168  $^\circ\text{C}$ .  $^1\text{H}$  NMR (500 MHz,  $\text{CDCl}_3$ )  $\delta$  8.53 (t,  $J = 2.0$  Hz, 1H), 8.25 (dd,  $J = 8.2, 2.1$  Hz, 1H), 8.02 (dd,  $J = 7.0, 1.7$  Hz, 1H), 7.94 (dd,  $J = 6.4, 3.0$  Hz, 2H), 7.70 – 7.63 (m, 2H), 7.51 (dd,  $J = 5.0, 1.9$  Hz, 3H).  $^{13}\text{C}$  NMR (126 MHz,  $\text{CDCl}_3$ )  $\delta$  148.8, 144.7, 136.3, 132.9, 132.0, 131.5, 130.2, 129.6, 129.2, 123.7, 120.5, 117.2, 109.3. HRMS (EI): calcd for  $\text{C}_{15}\text{H}_{10}\text{N}_2\text{O}_2$  ( $\text{M}^+$ ) 250.0737, found 250.0743.

**Ethyl 2-cyano-3-(4-hydroxy-3-methoxyphenyl)acrylate (13u).** Yellow solid. Mp: 109-110  $^\circ\text{C}$  (lit.<sup>25</sup> mp 108-109  $^\circ\text{C}$ ).  $^1\text{H}$  NMR (500 MHz,  $\text{CDCl}_3$ )  $\delta$  8.12 (s, 1H), 7.83 (d,  $J = 2.0$  Hz, 1H), 7.38 (dd,  $J = 8.3, 2.0$  Hz, 1H), 6.98 (d,  $J = 8.3$  Hz, 1H), 6.36 (s, 1H), 4.36 (q,  $J = 7.1$  Hz, 2H), 3.96 (s, 3H), 1.38 (t,  $J = 7.1$  Hz, 3H).  $^{13}\text{C}$  NMR (126 MHz,  $\text{CDCl}_3$ )  $\delta$  163.1, 154.8, 150.9, 146.8, 128.7, 124.2, 116.4, 114.9, 111.2, 98.9, 62.4, 56.1, 14.1. HRMS (EI): calcd for  $\text{C}_{13}\text{H}_{13}\text{O}_4\text{N}$  ( $\text{M}^+$ ) 247.0845, found 247.0846.

**2-(3,4-Dimethoxybenzylidene)malononitrile (13v).** Yellow solid. Mp: 144-145  $^\circ\text{C}$  (lit.<sup>26</sup> mp 142  $^\circ\text{C}$ ).  $^1\text{H}$  NMR (500 MHz,  $\text{CDCl}_3$ )  $\delta$  7.64 (d,  $J = 3.4$  Hz, 2H), 7.38 (dd,  $J = 8.5, 2.1$  Hz, 1H), 6.95 (d,  $J = 8.5$  Hz, 1H), 3.96 (s, 3H), 3.91 (s, 3H).  $^{13}\text{C}$  NMR (126 MHz,  $\text{CDCl}_3$ )  $\delta$  159.1, 154.8, 149.4, 128.1, 124.2, 114.4, 113.5, 111.1, 110.8, 78.2, 56.2, 56.0. HRMS (EI): calcd for  $\text{C}_{12}\text{H}_{10}\text{N}_2\text{O}_2$  ( $\text{M}^+$ ) 214.0737, found 214.0737.

**2-(4-tert-butylbenzylidene)malononitrile (13w).** White solid. Mp: 91-92  $^\circ\text{C}$ .  $^1\text{H}$  NMR (500 MHz,  $\text{CDCl}_3$ )  $\delta$  7.86 (d,  $J = 8.5$  Hz, 2H), 7.74 (s, 1H), 7.55 (d,  $J = 8.5$  Hz, 2H), 1.35 (s, 9H).  $^{13}\text{C}$  NMR (126 MHz,  $\text{CDCl}_3$ )  $\delta$  159.6, 159.2, 130.8, 128.4, 126.6, 114.0, 112.8, 81.3, 35.5, 30.8. HRMS (EI): calcd for  $\text{C}_{14}\text{H}_{14}\text{N}_2$  ( $\text{M}^+$ ) 210.1152, found 210.1158.

**2-(Naphthalen-2-ylmethylene)malononitrile (13x).** Yellow solid. Mp: 141-142  $^\circ\text{C}$  (lit.<sup>16</sup> mp 140.2-140.8  $^\circ\text{C}$ ).  $^1\text{H}$  NMR (500 MHz,  $\text{CDCl}_3$ )  $\delta$  8.25 (s, 1H), 8.05 (dd,  $J = 8.7, 1.8$  Hz, 1H), 7.94 (t,  $J = 7.2$  Hz, 2H), 7.90 (d,  $J = 8.2$  Hz, 1H), 7.86 (s, 1H), 7.68 (t,  $J = 7.5$  Hz, 1H), 7.61 (t,  $J = 7.5$  Hz, 1H).  $^{13}\text{C}$  NMR (126 MHz,  $\text{CDCl}_3$ )  $\delta$  159.6, 135.8, 134.4, 132.5, 129.9, 129.6, 129.6, 128.5, 128.0, 127.7, 124.1, 113.9, 112.8, 82.1. HRMS (EI): calcd for  $\text{C}_{14}\text{H}_8\text{N}_2$  ( $\text{M}^+$ ) 204.0682, found 204.0684.



## References

- (1) Wu, J.; Zhang, D.; Wei, S. *Synthetic Commun.*, **2005**, *35*, 1213.
- (2) Pradhan, P. P.; Bobbitt, J. M.; Bailey, W. F. *J. Org. Chem.*, **2009**, *74*, 9524.
- (3) Cacchi, S.; Fabrizi, G.; Goggiamani, A. *J. Comb. Chem.*, **2004**, *6*, 692.
- (4) Yasuhara, A.; Kasano, A.; Sakamoto, T. *J. Org. Chem.*, **1999**, *64*, 4211.
- (5) Tummatorn, J.; Dudley, G. B. *Org. Lett.*, **2011**, *13*, 1572.
- (6) Kijima, M.; Nambu, Y.; Endo, T.; Okawara, M. *J. Org. Chem.*, **1984**, *49*, 1434.
- (7) Gribble, G. W.; Jiang, J.; Liu Y. *J. Org. Chem.*, **2002**, *67*, 1001.
- (8) Yang, S. H.; Li, C. S.; Cheng, C. H. *J. Org. Chem.*, **1987**, *52*, 691.
- (9) Akhrem, A. A.; Moiseenkov, A. M. *Izv. Akad. Nauk SSSR, Ser. Khim.*, **1968**, *8*, 1919.
- (10) Akhrem, A. A.; Moiseenkov, A. M.; Poselenov, A. I. *Izv. Akad. Nauk SSSR, Ser. Khim.*, **1970**, *3*, 699.
- (11) Cui, L.-Q.; Liu, K.; Zhang, C. *Org. Biomol. Chem.*, **2011**, *9*, 2258.
- (12) Kumar, A.; Ila, H.; Junjappa, H. *J. Chem. Res. Synop.*, **1979**, *8*, 268.
- (13) Jiang, H.; Liu, B.; Li, Y.; Wang, A.; Huang, H. *Org. Lett.*, **2011**, *13*, 1028.
- (14) Ren, Y.-M.; Cai, C. *Synthetic Commun.*, **2007**, *37*, 2209.
- (15) Pande, A.; Ganesan, K.; Jain, A. K.; Gupta, P. K.; Malhotra, R. C. *Org. Process Res. Dev.*, **2005**, *9*, 133.
- (16) Kharas, G. B.; Hanawa, E.; Lachenberg, J.; Brozek, B.; Miramon, P.; Mojica, A. C.; Colbert, A. C.; Crowell, B. T.; Madison, A.; Martinez, A. P. *J. Macromol. Sci., Pure Appl. Chem.*, **2008**, *45*, 420.
- (17) Lv, Y.; Guo, Y.; Xu, J.; Shao, S. *J. Fluorine Chem.*, **2011**, *132*, 973.
- (18) Yadav, J. S.; Reddy, B. V. S.; Basak, A. K.; Visali, B.; Narsaiah, A. V.; Nagaiah, K. *Eur. J. Org. Chem.*, **2004**, 546.
- (19) Zhang, M.; Zhang, A.-Q.; Chen, H.-H.; Chen, J.; Chen, H.-Y. *Synthetic Commun.*, **2006**, *36*, 3441.
- (20) Zhang, J.; Jiang, T.; Han, B.; Zhu, A.; Ma, X. *Synthetic Commun.*, **2006**, *36*, 3305.
- (21) Yamashita, K.; Tanaka, T.; Hayashi, M. *Tetrahedron*, **2005**, *61*, 7981.
- (22) Sharma, Y. O.; Degani, M. S. *Green Chem.*, **2009**, *11*, 526.
- (23) Delaney, A. D.; Currie, D. J.; Holmes, H. L. *Can. J. Chem.*, **1969**, *47*, 3273.
- (24) Siby, A.; Loreau, O.; Taran, F. *Synthesis*, **2009**, *14*, 2365.
- (25) Popp, F. D. *J. Org. Chem.*, **1960**, *25*, 646.
- (26) Karmakar, B.; Chowdhury, B.; Banerji, J. *Catalysis Commun.*, **2010**, *11*, 601.

NMR spectra of new compounds:

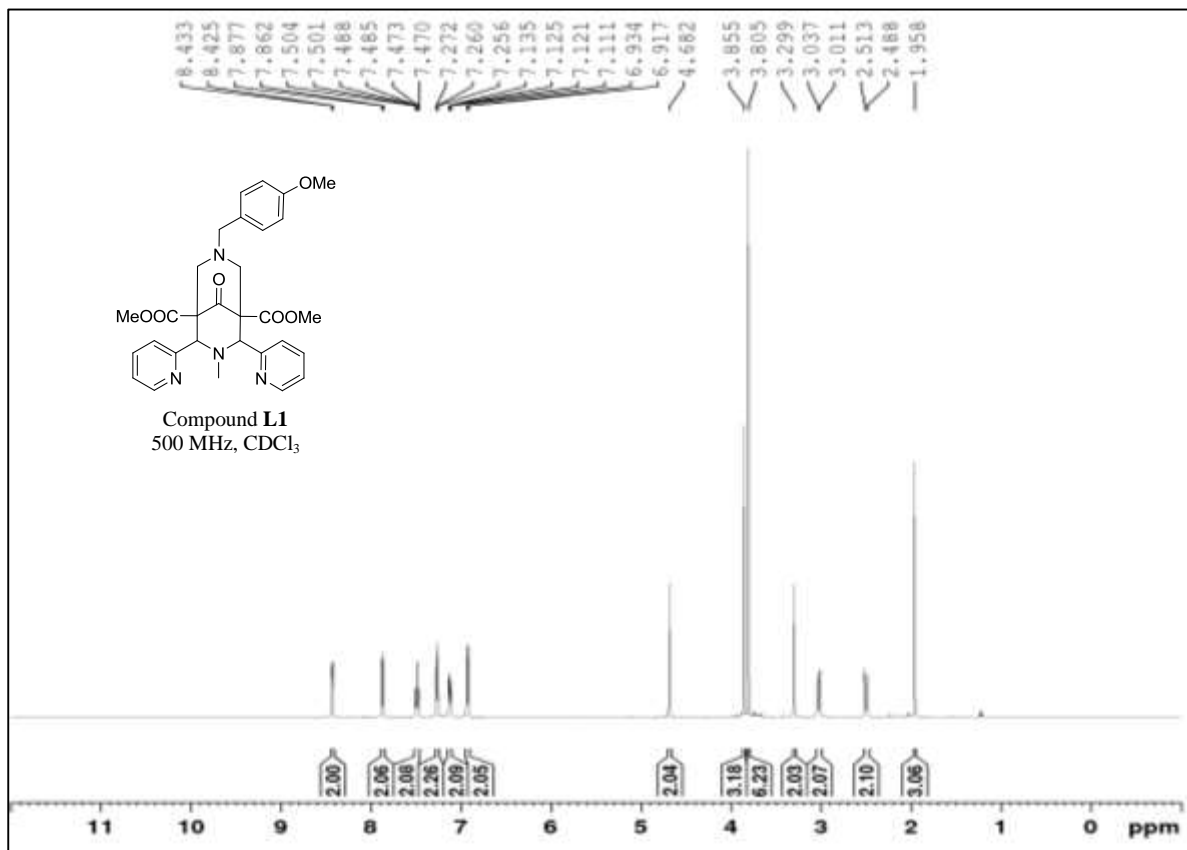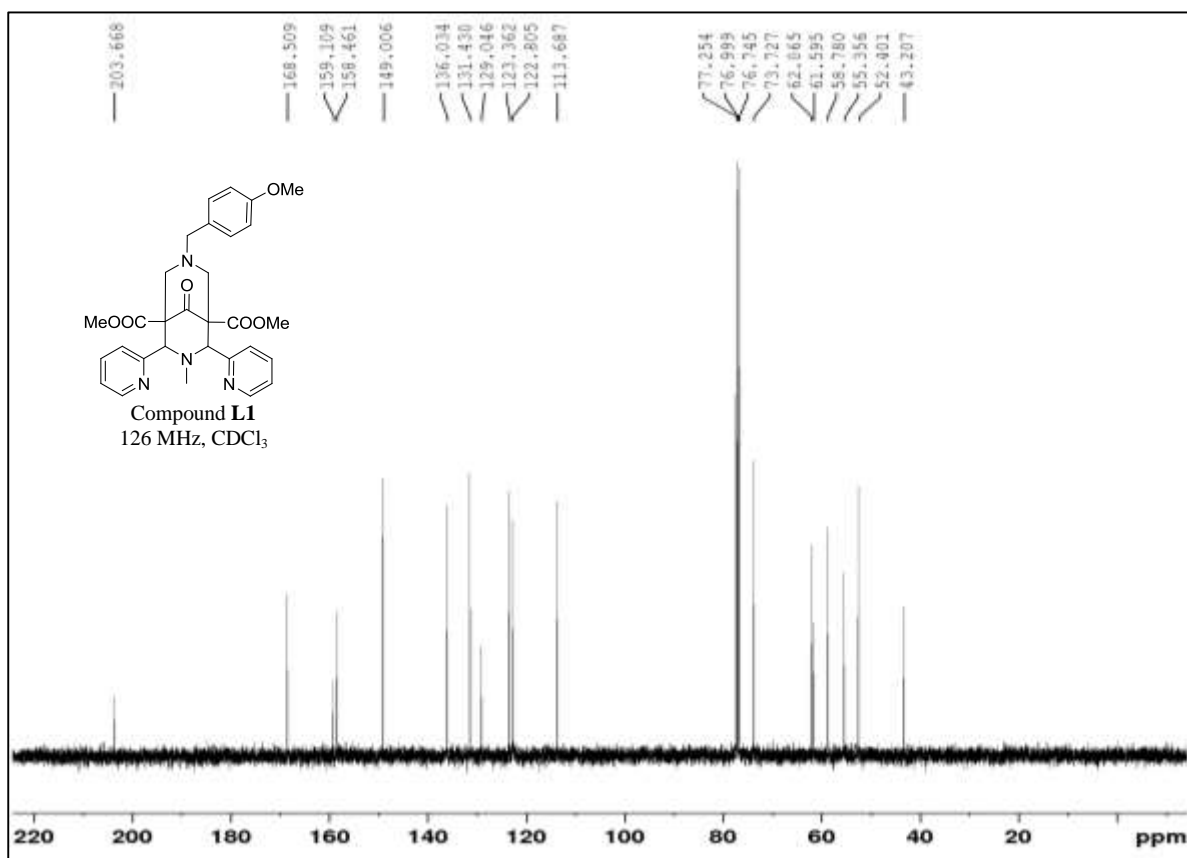

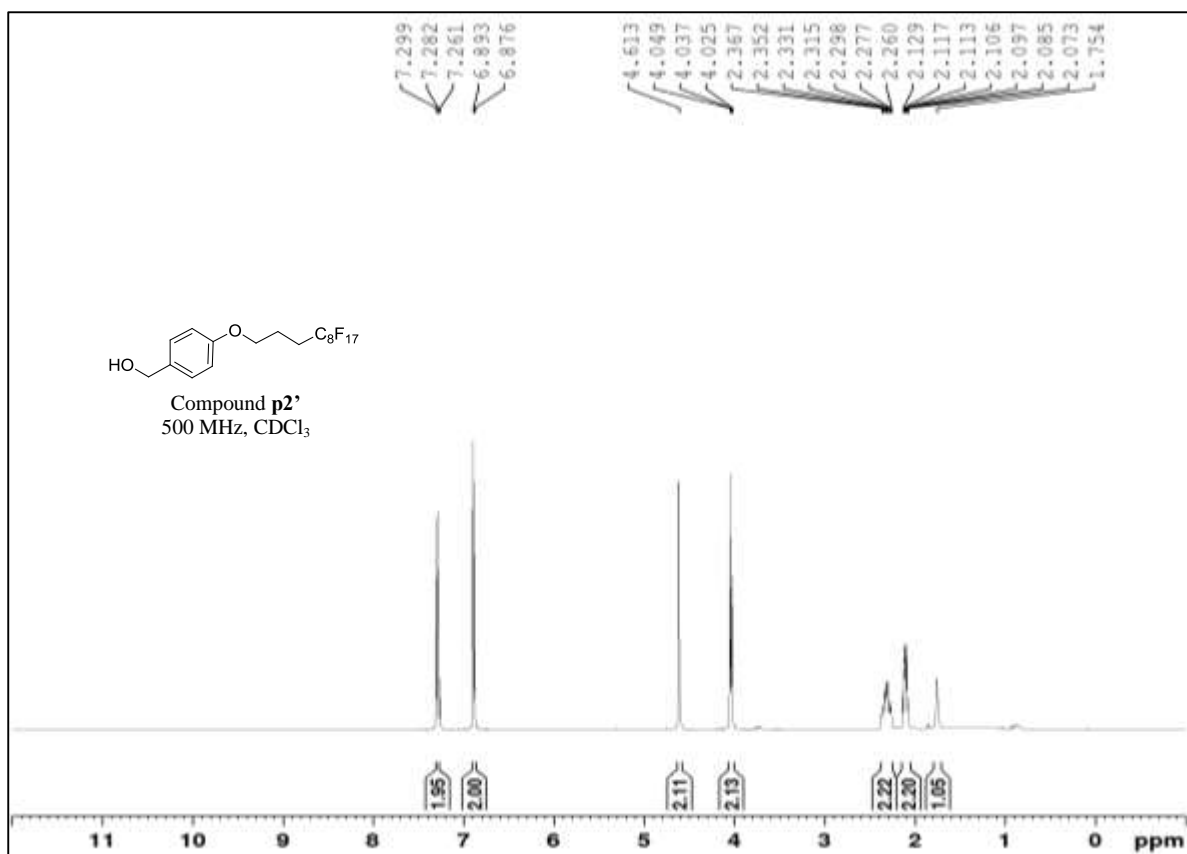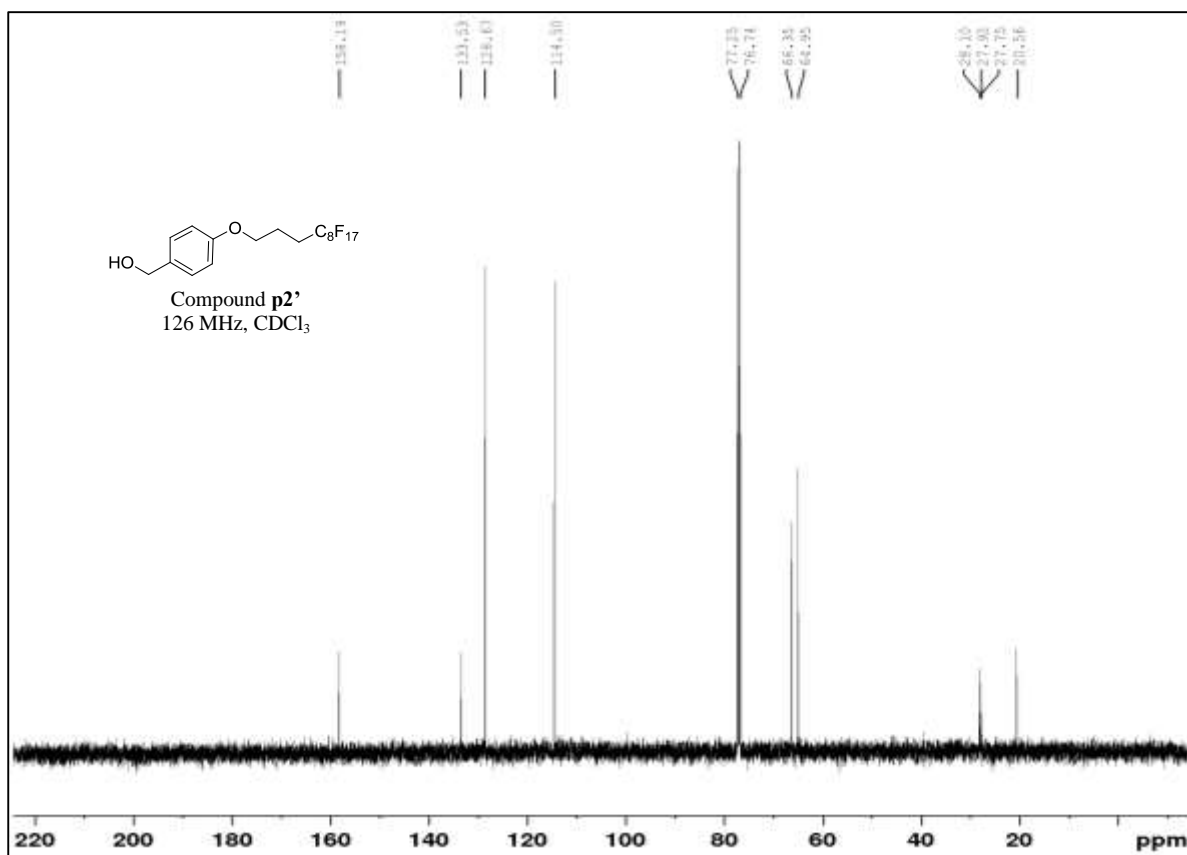

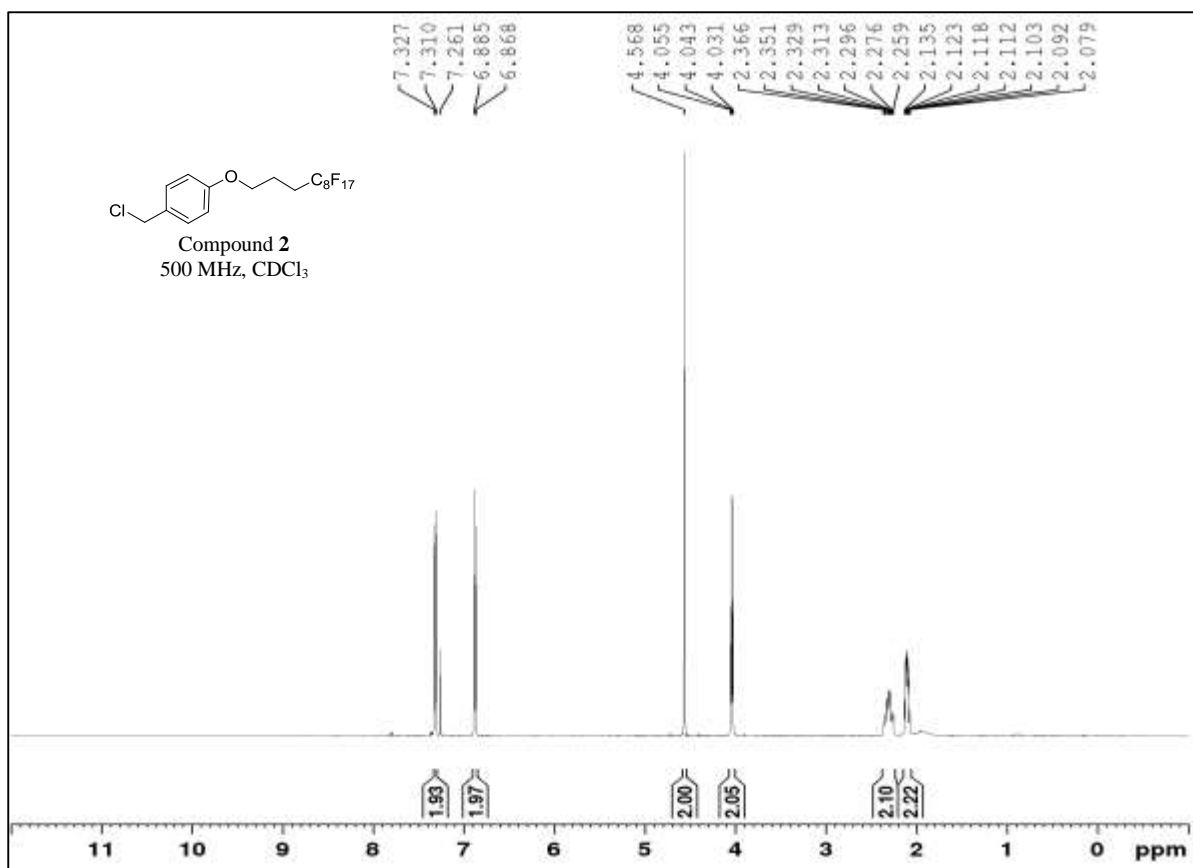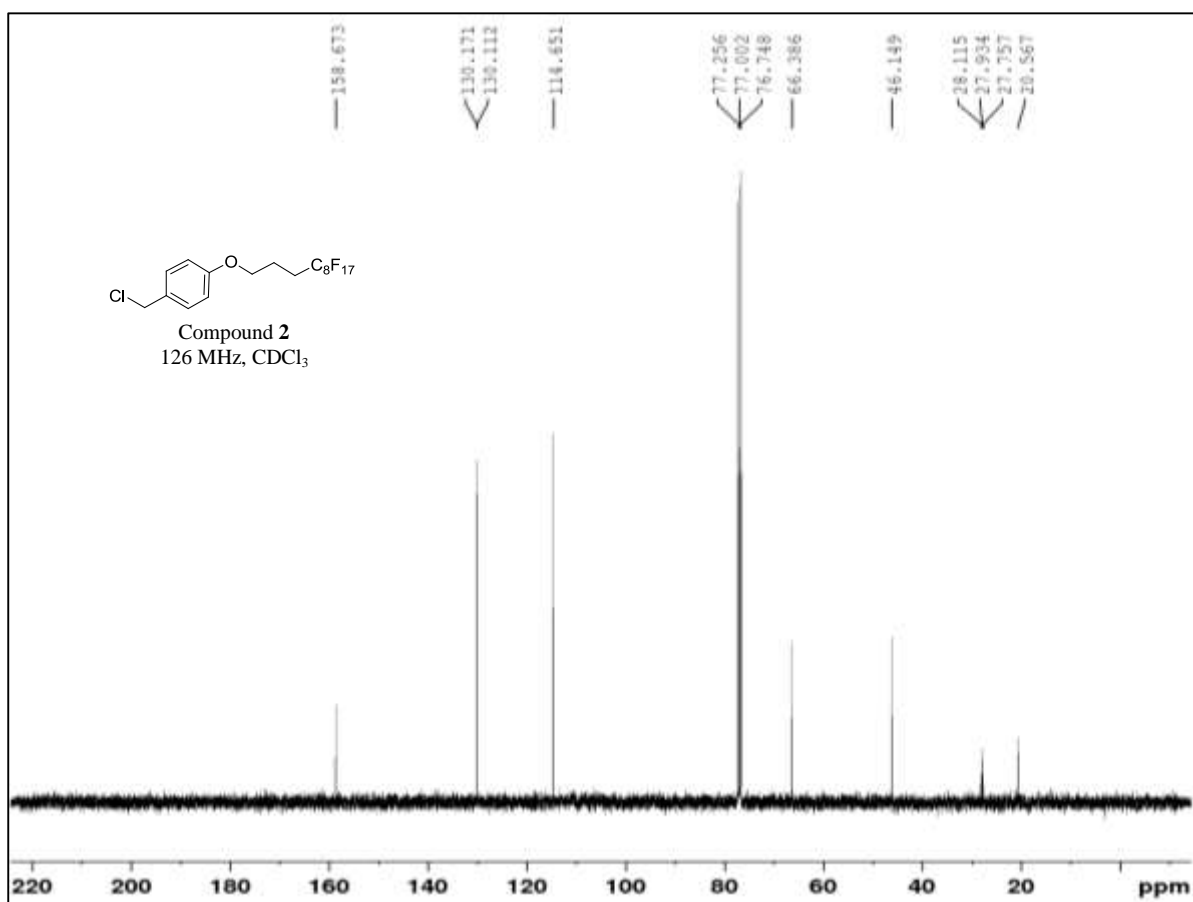

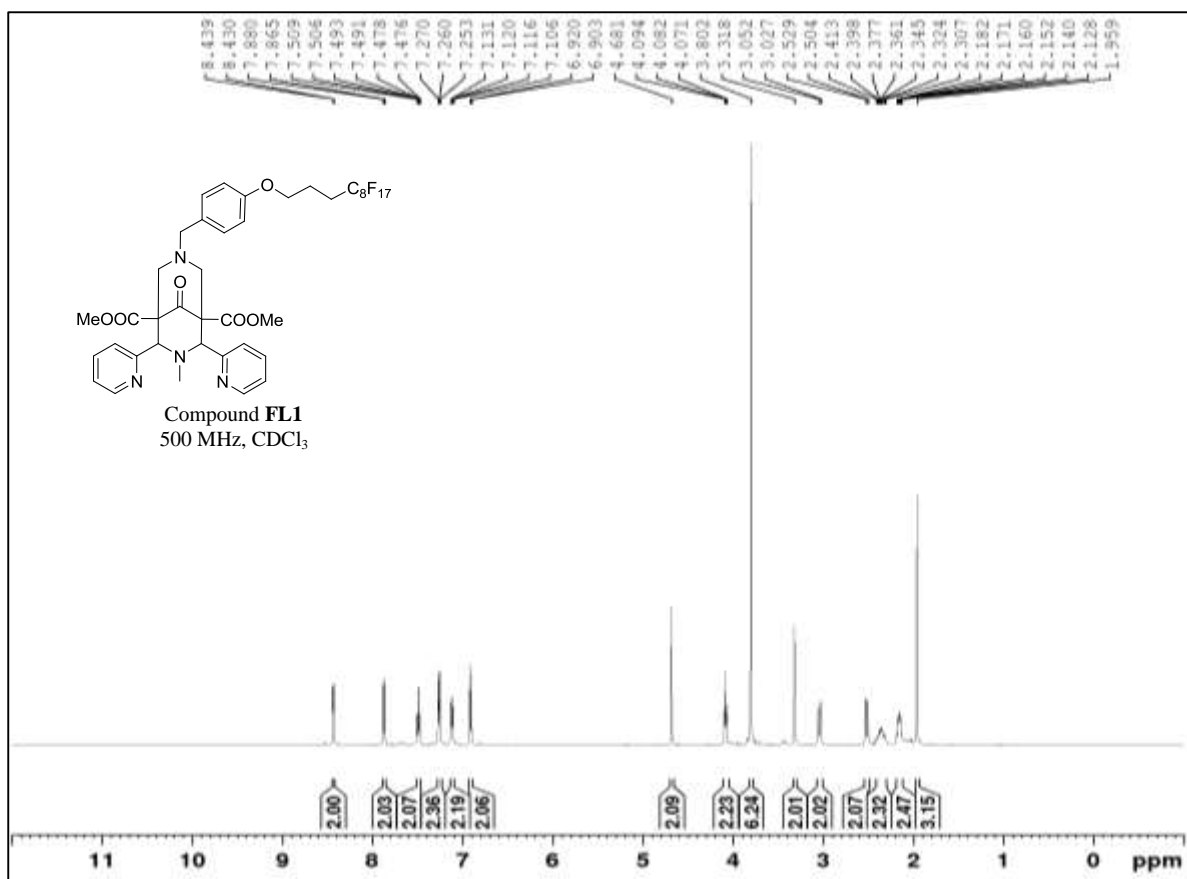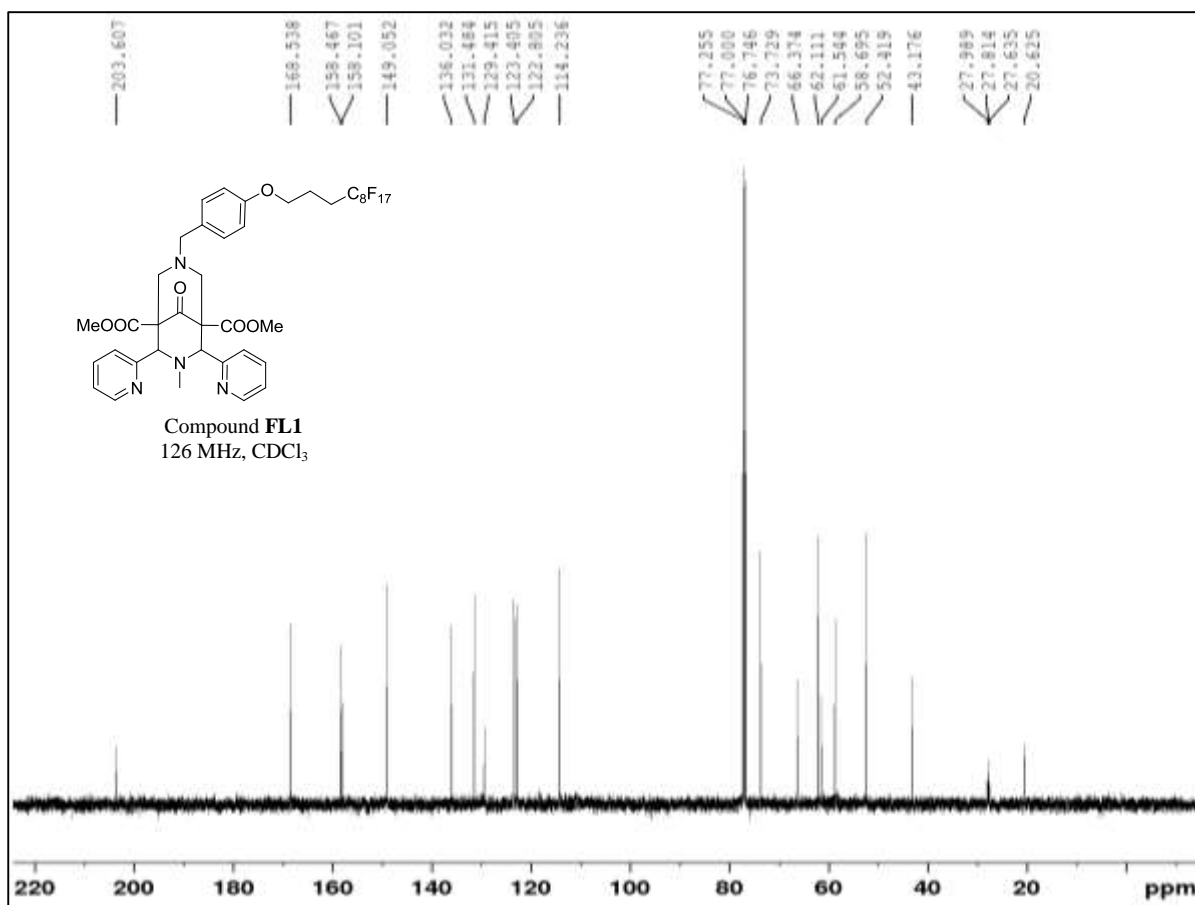

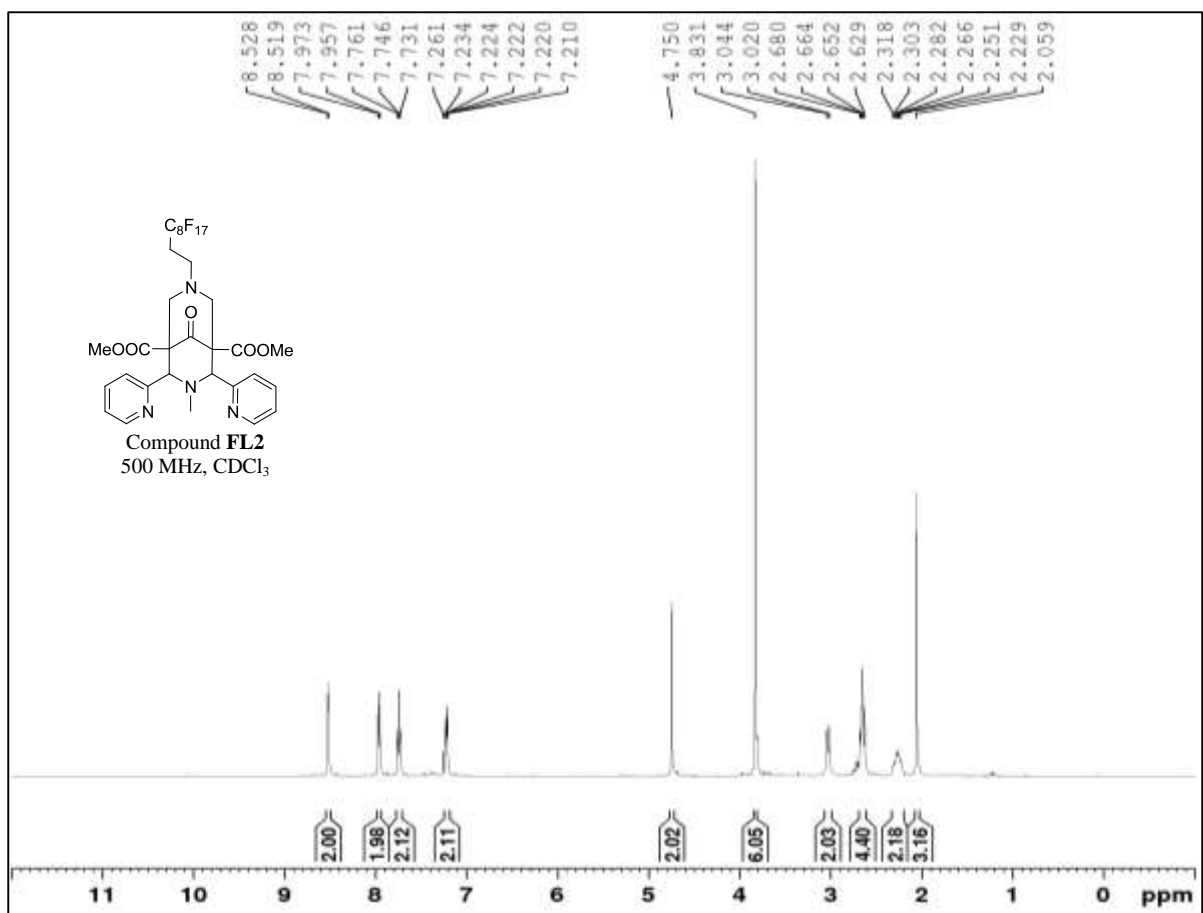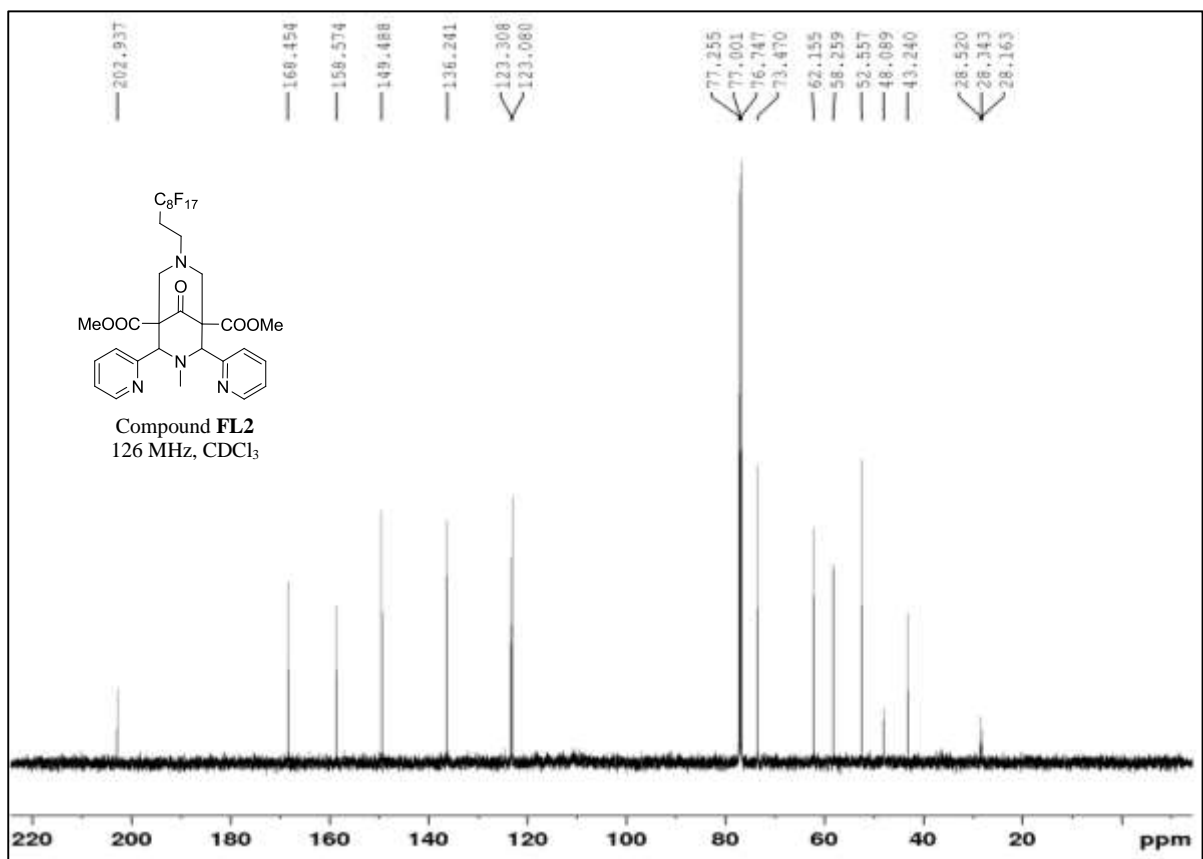

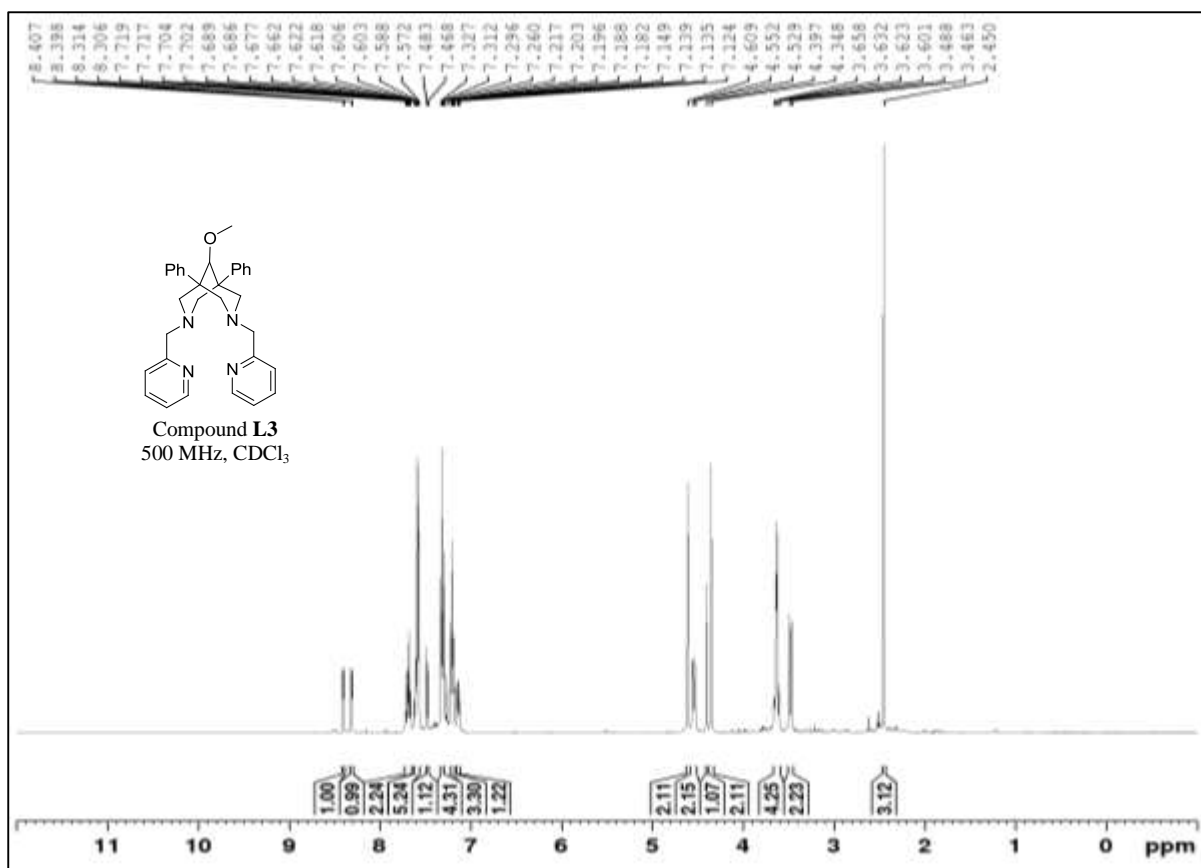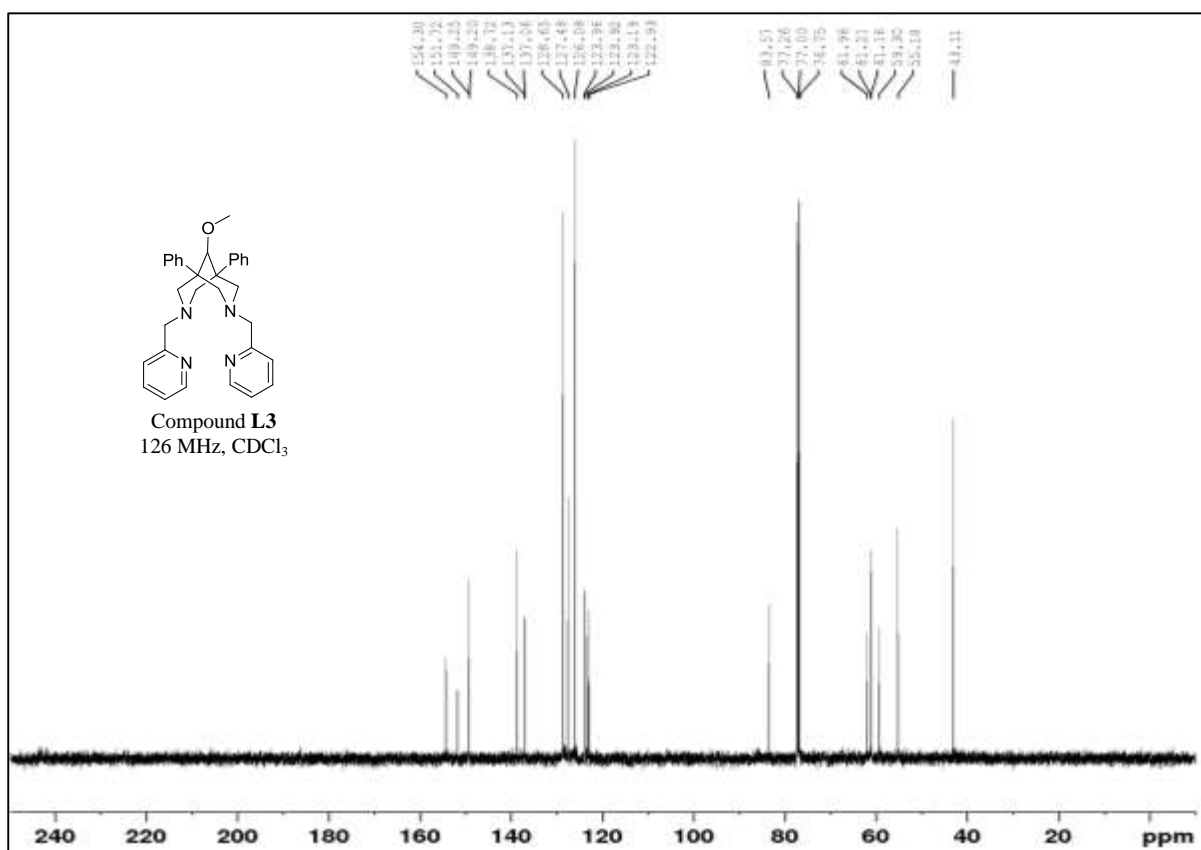

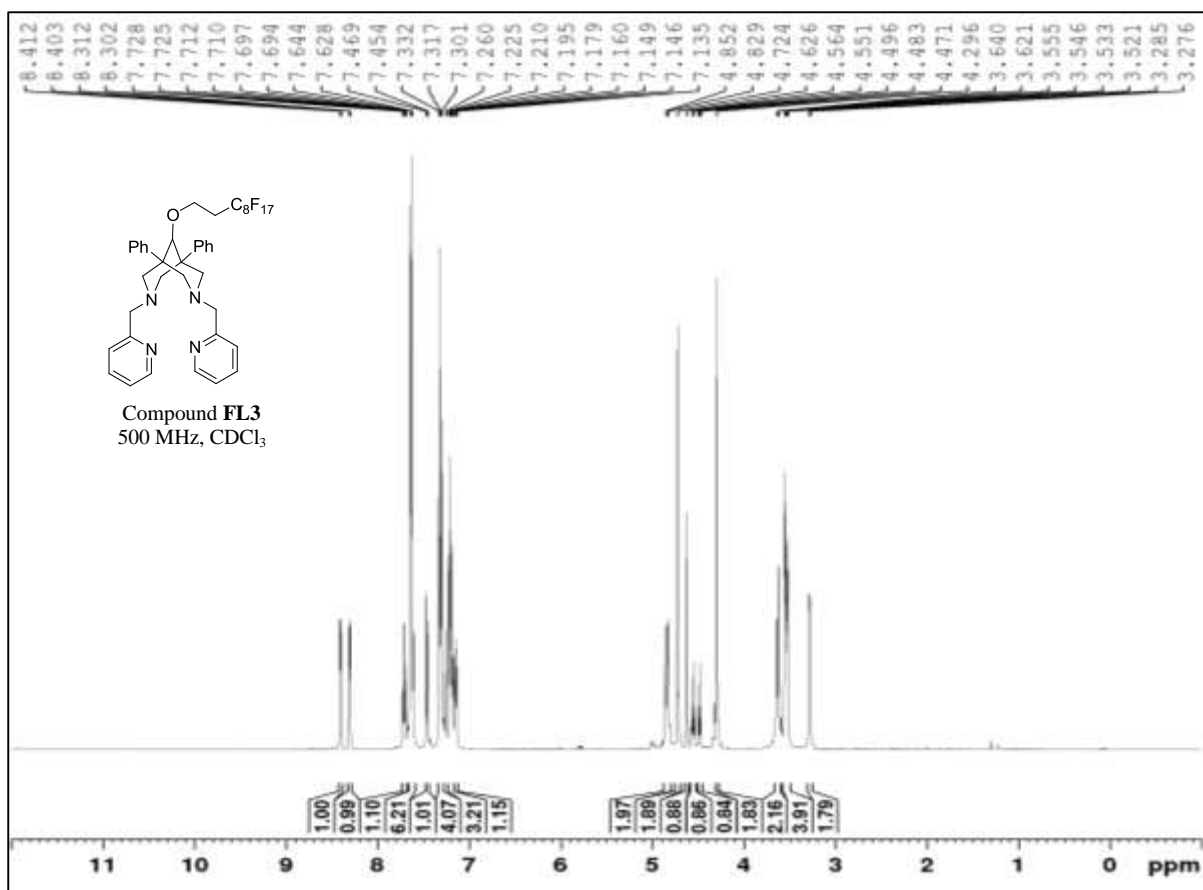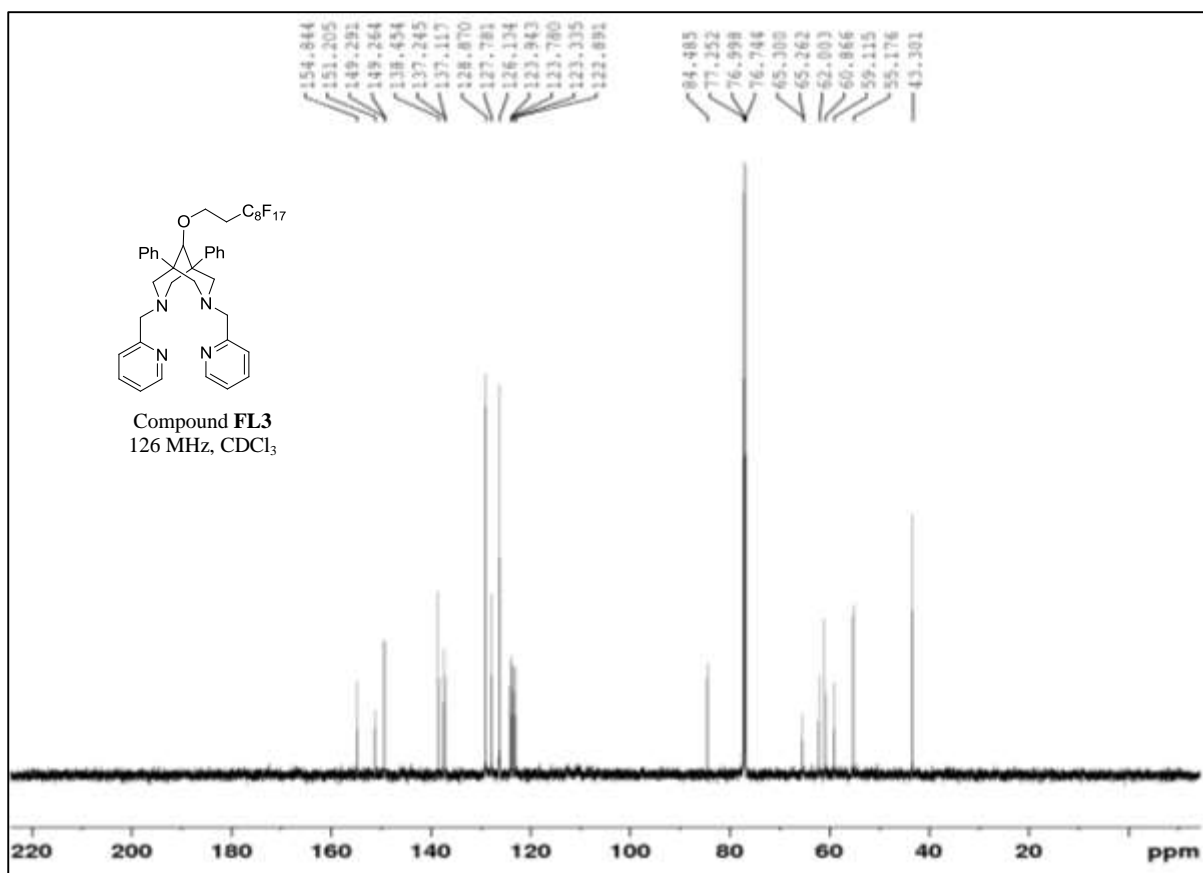



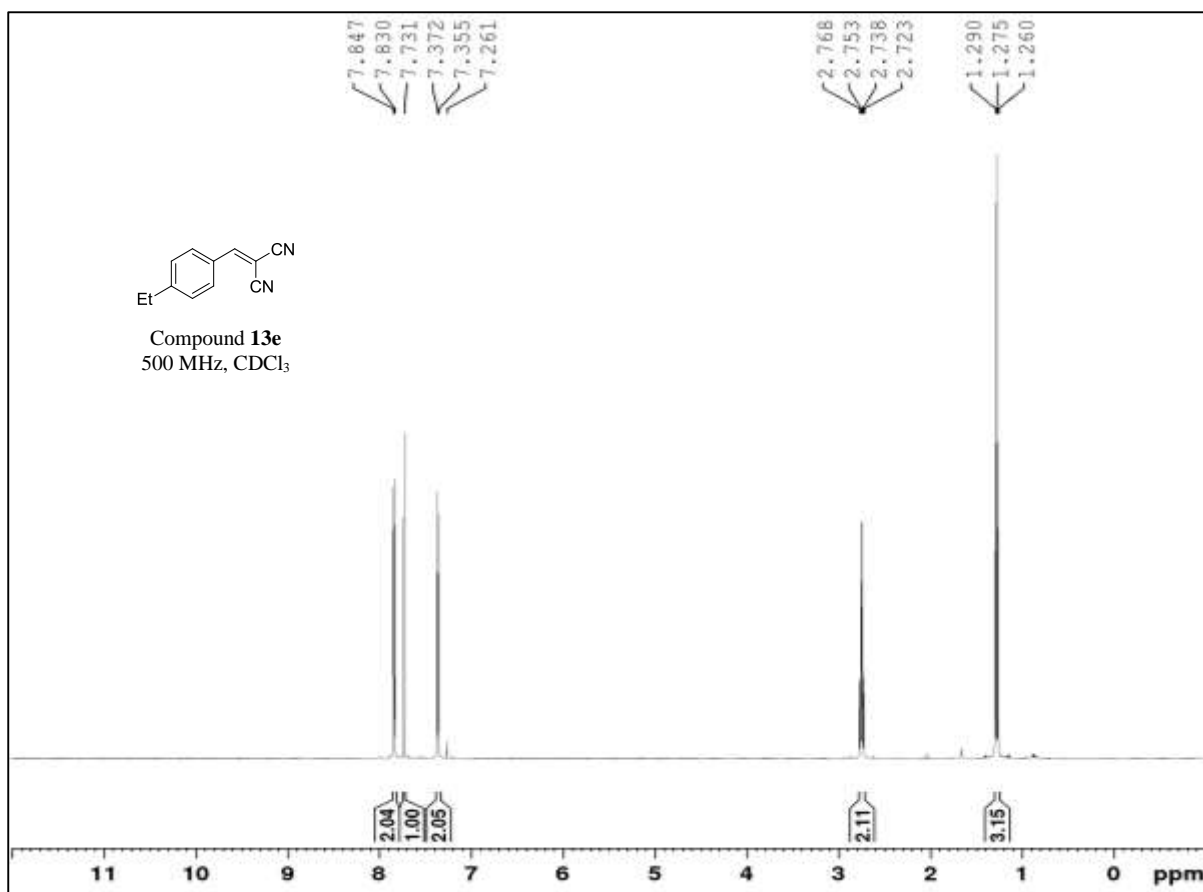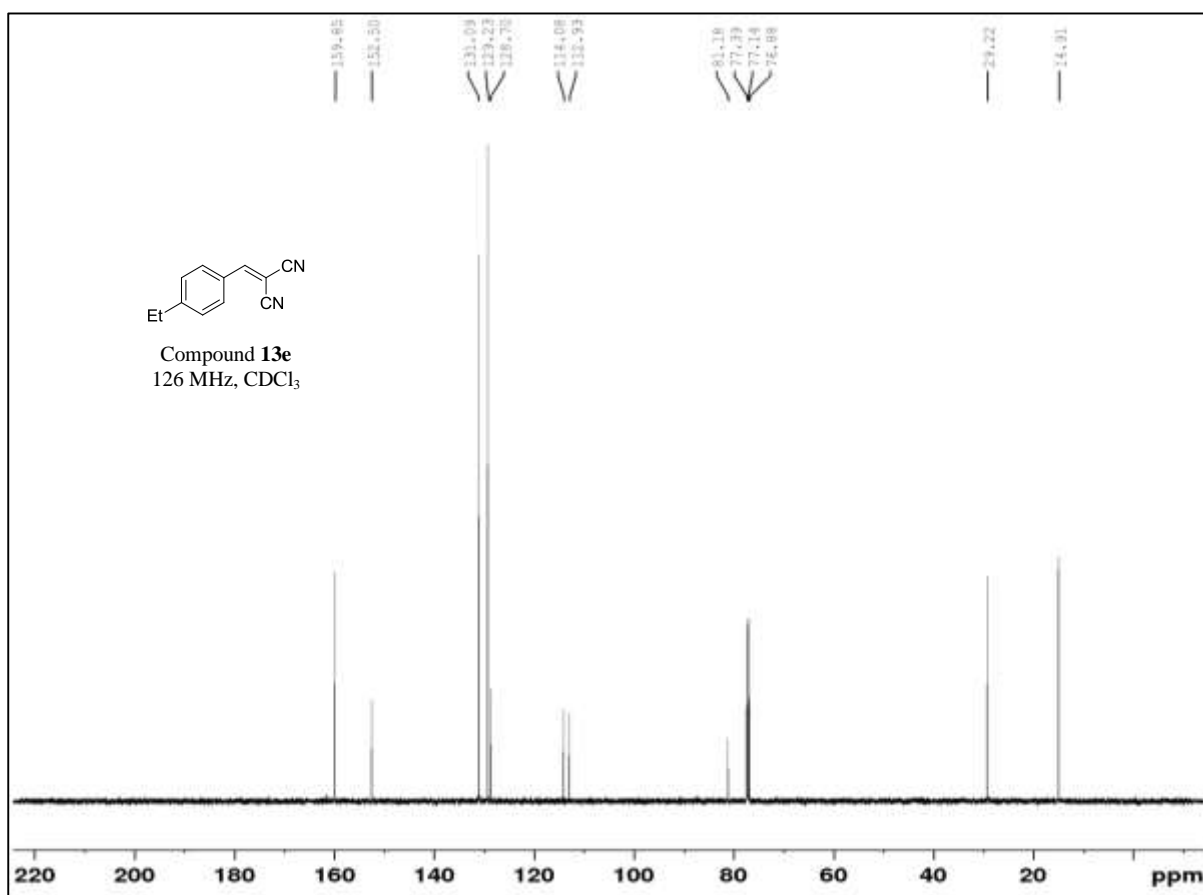

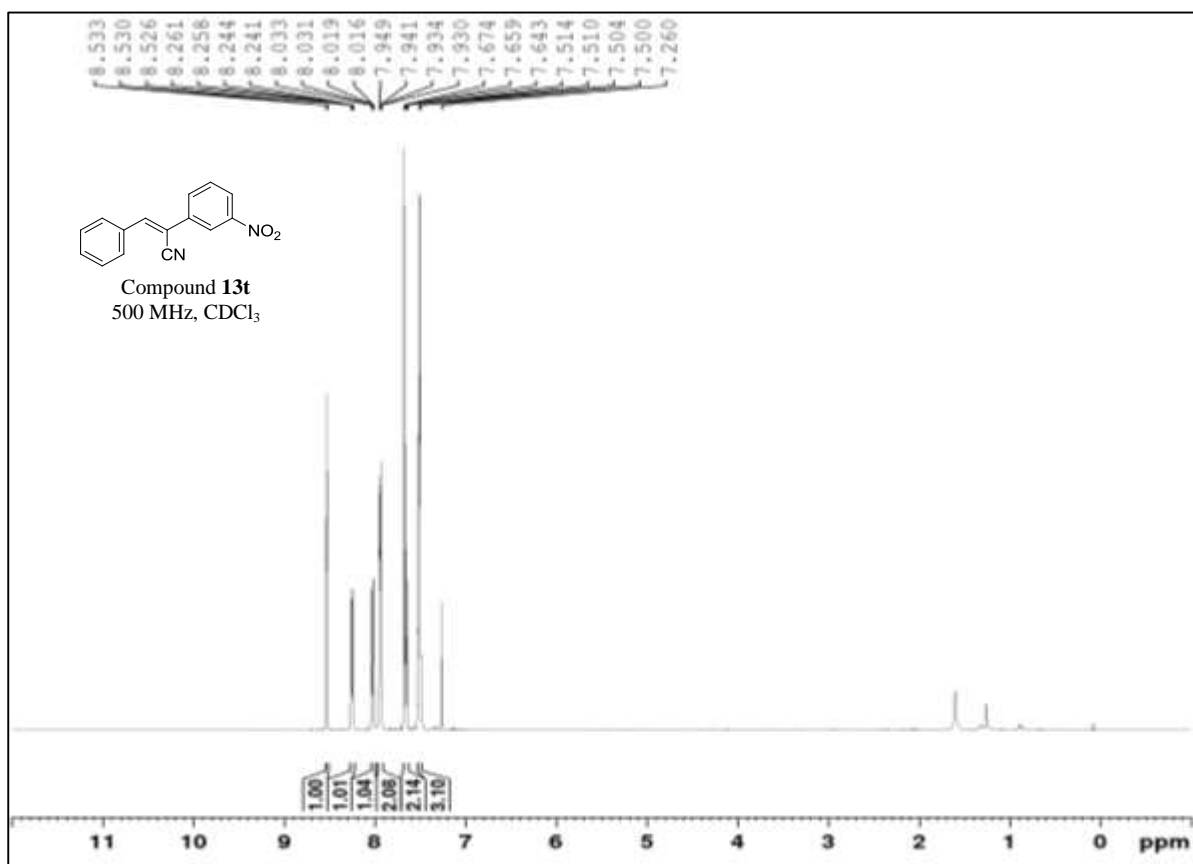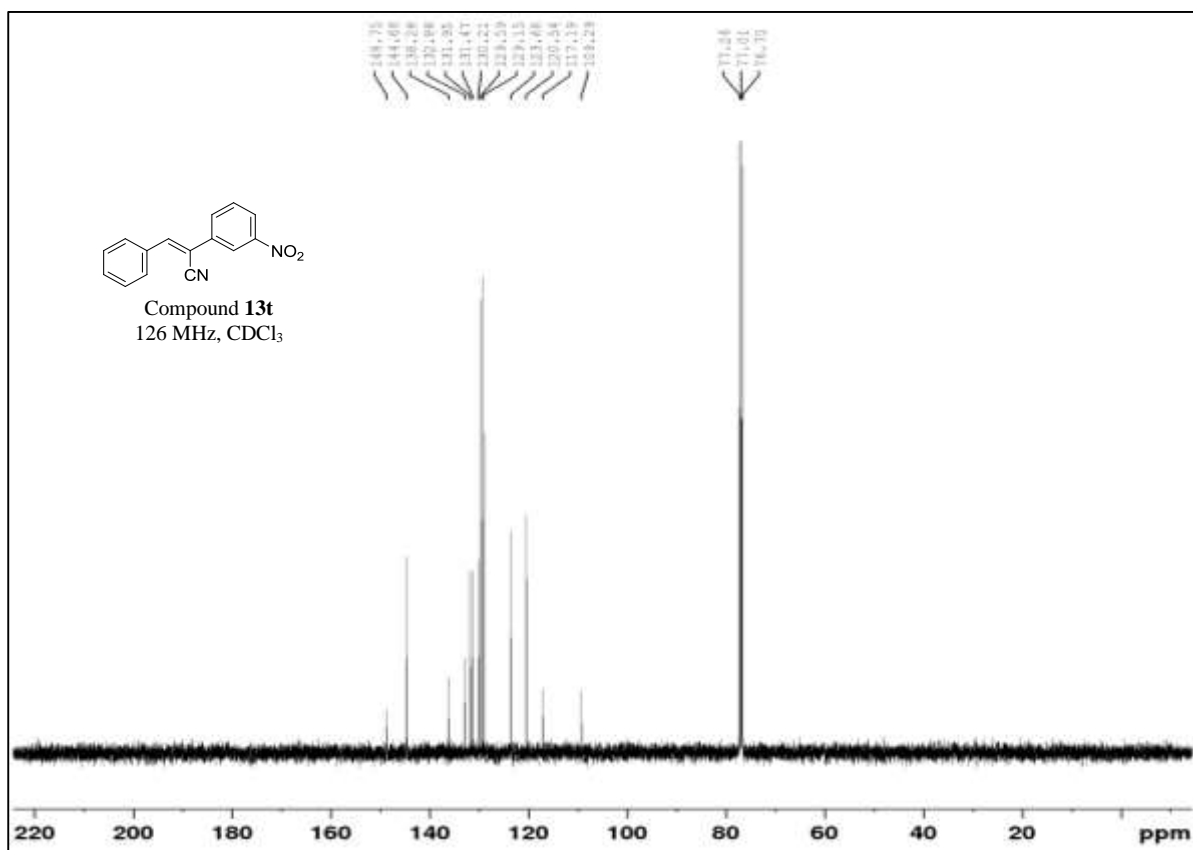

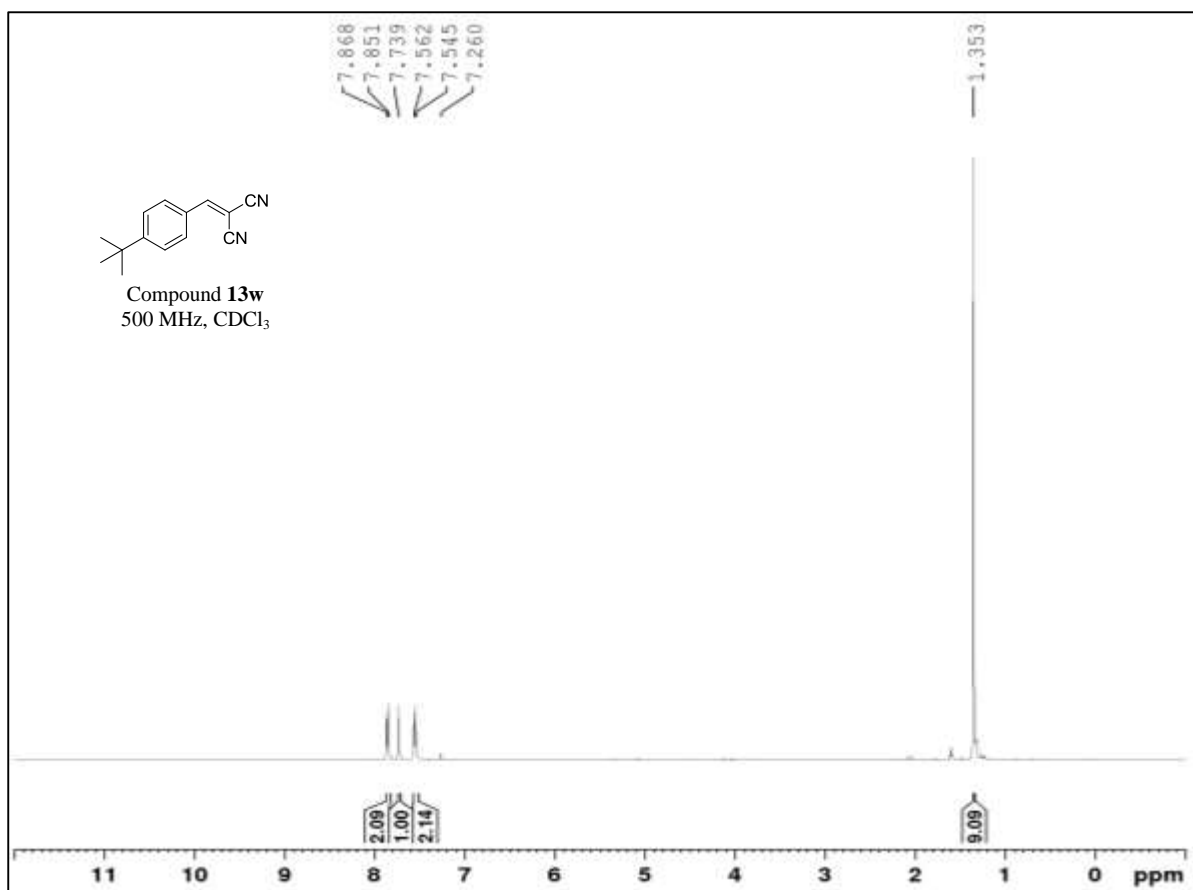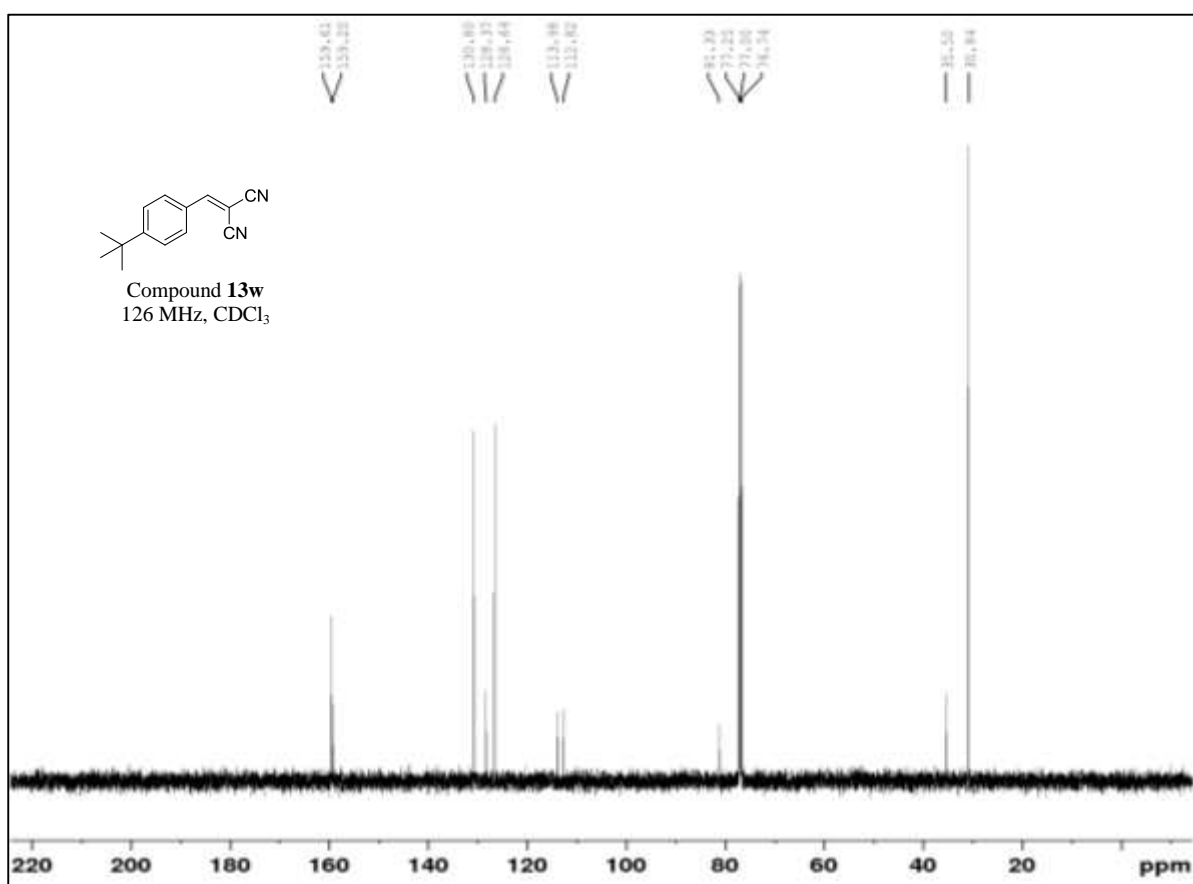

NMR spectra of known compounds:

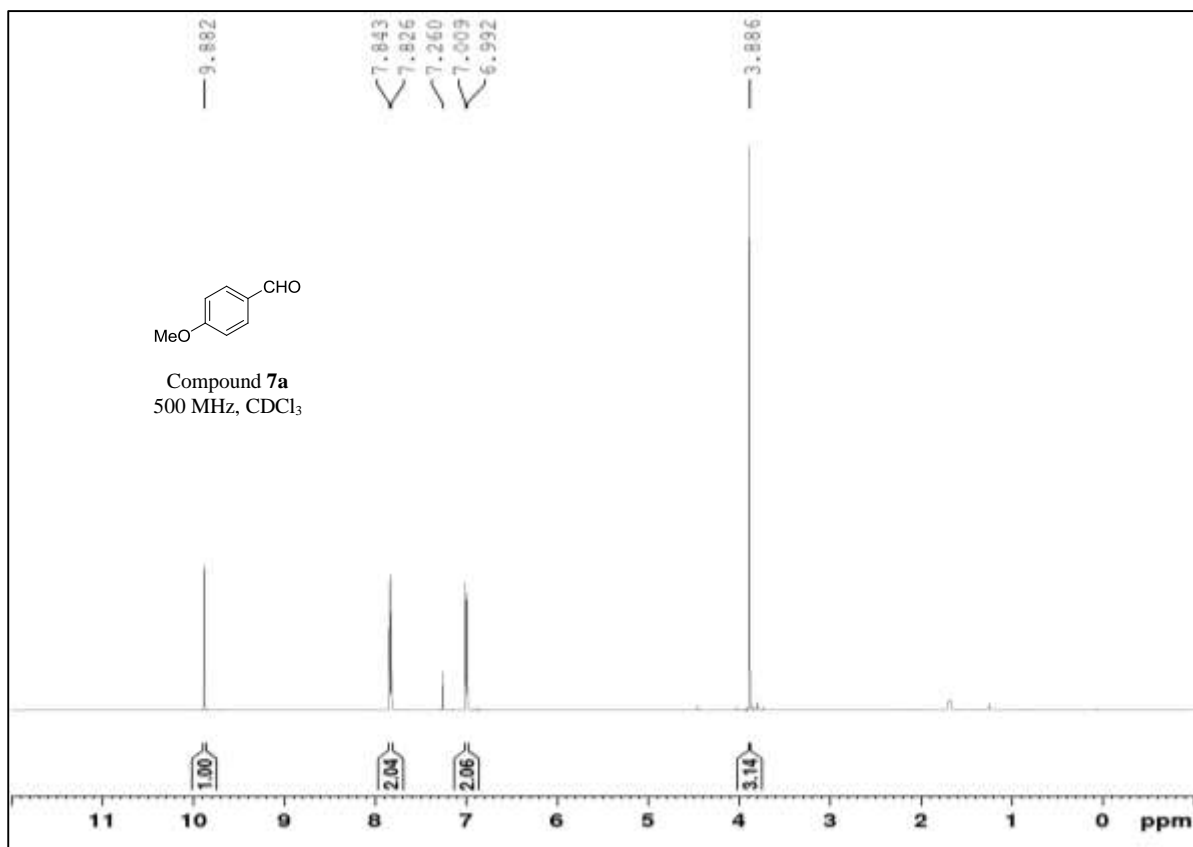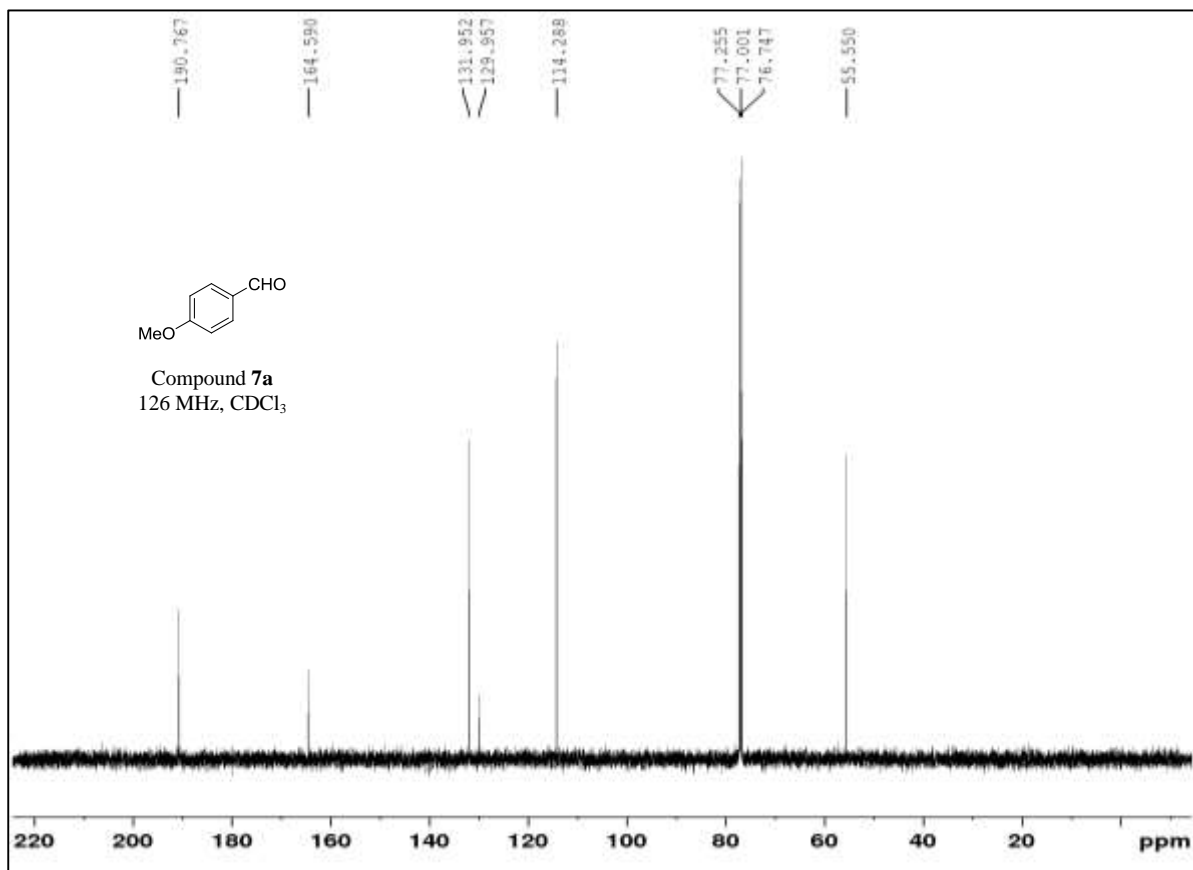

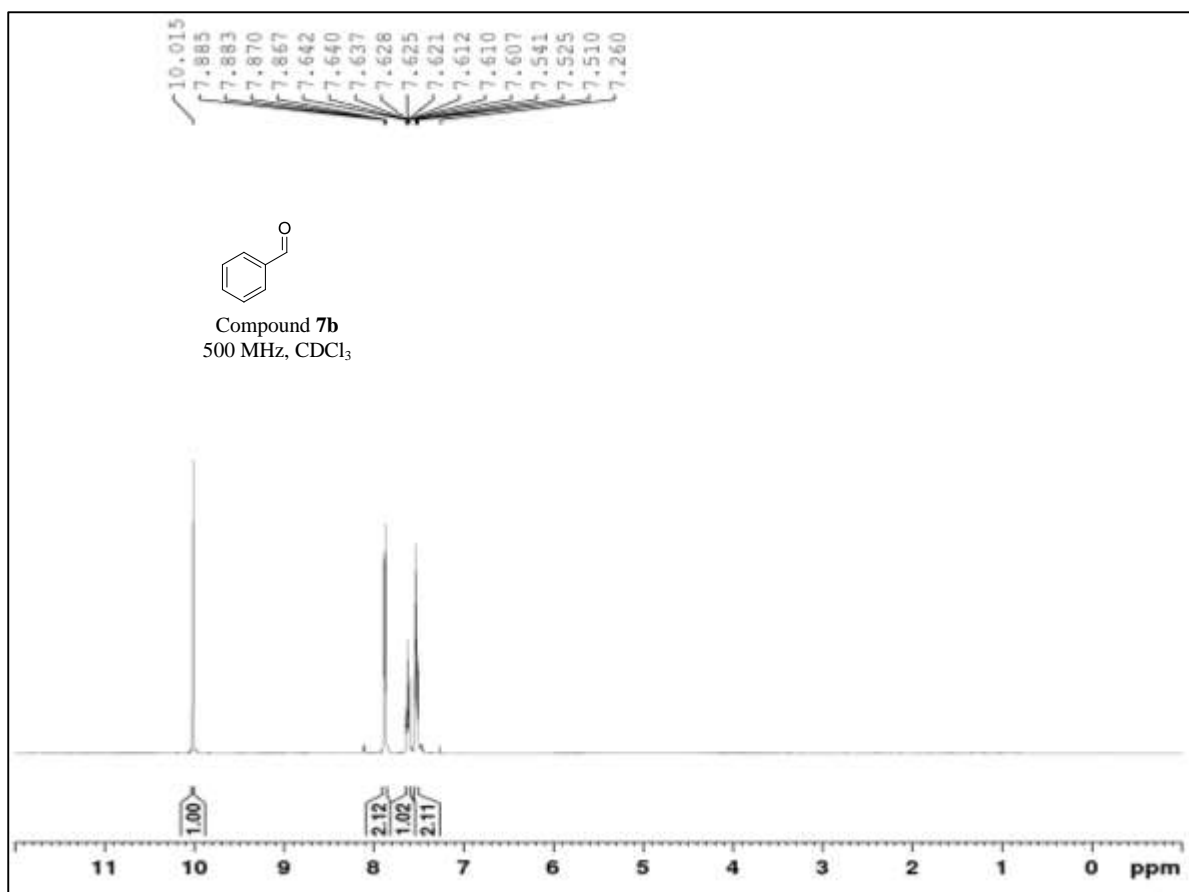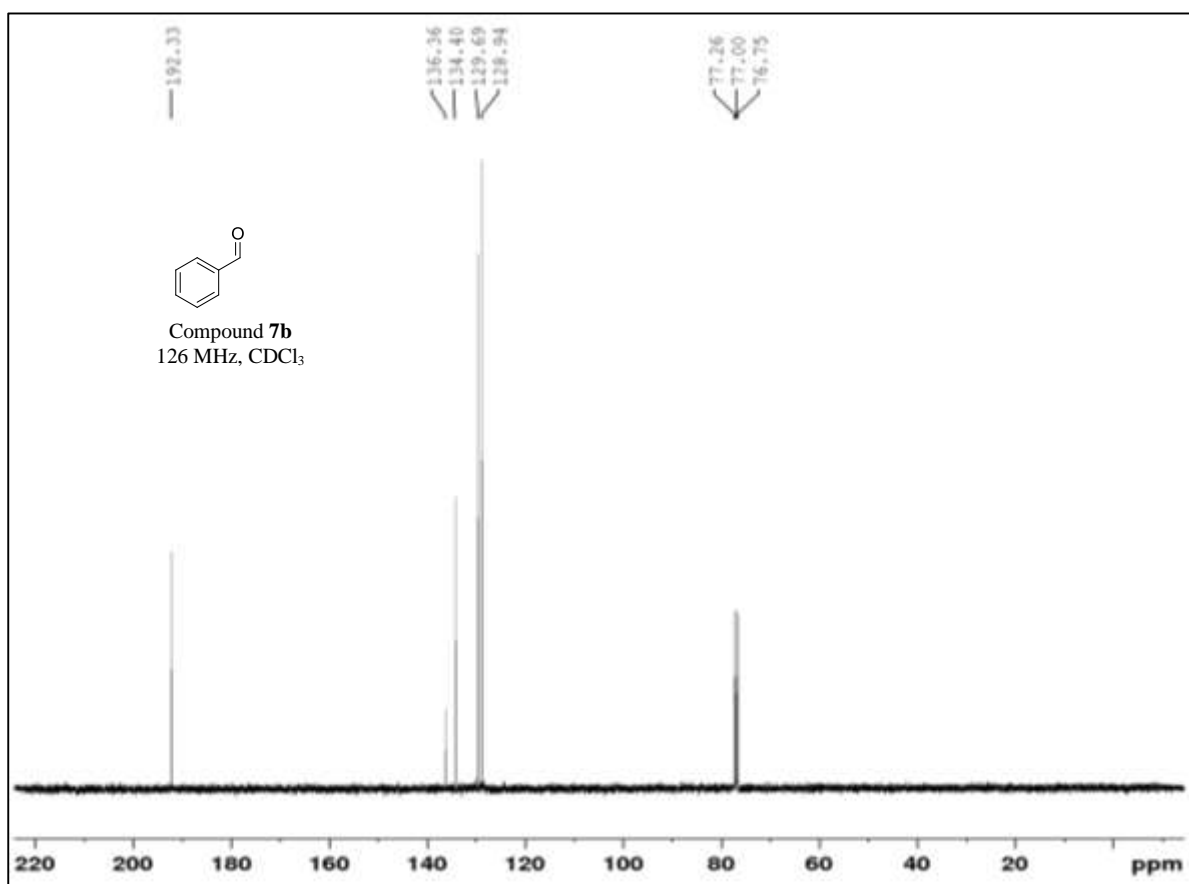

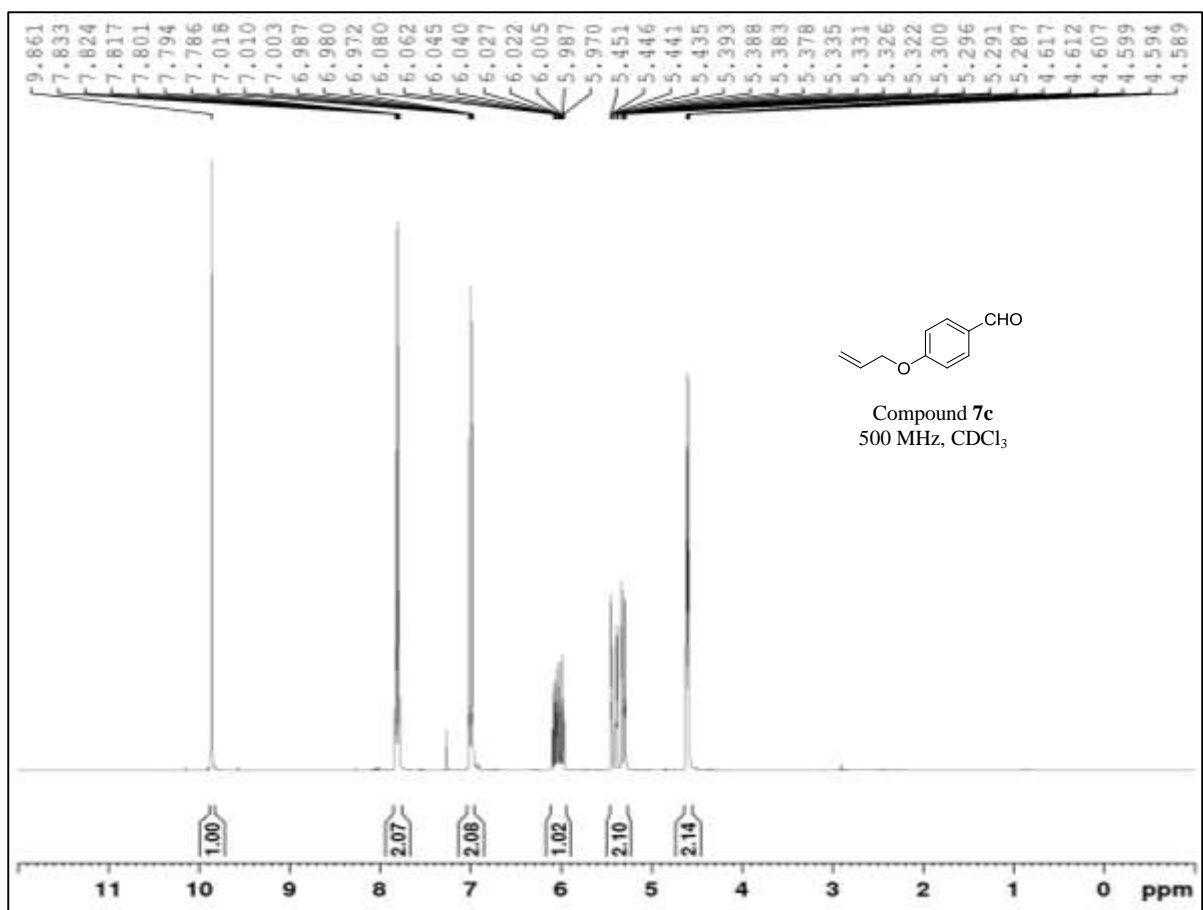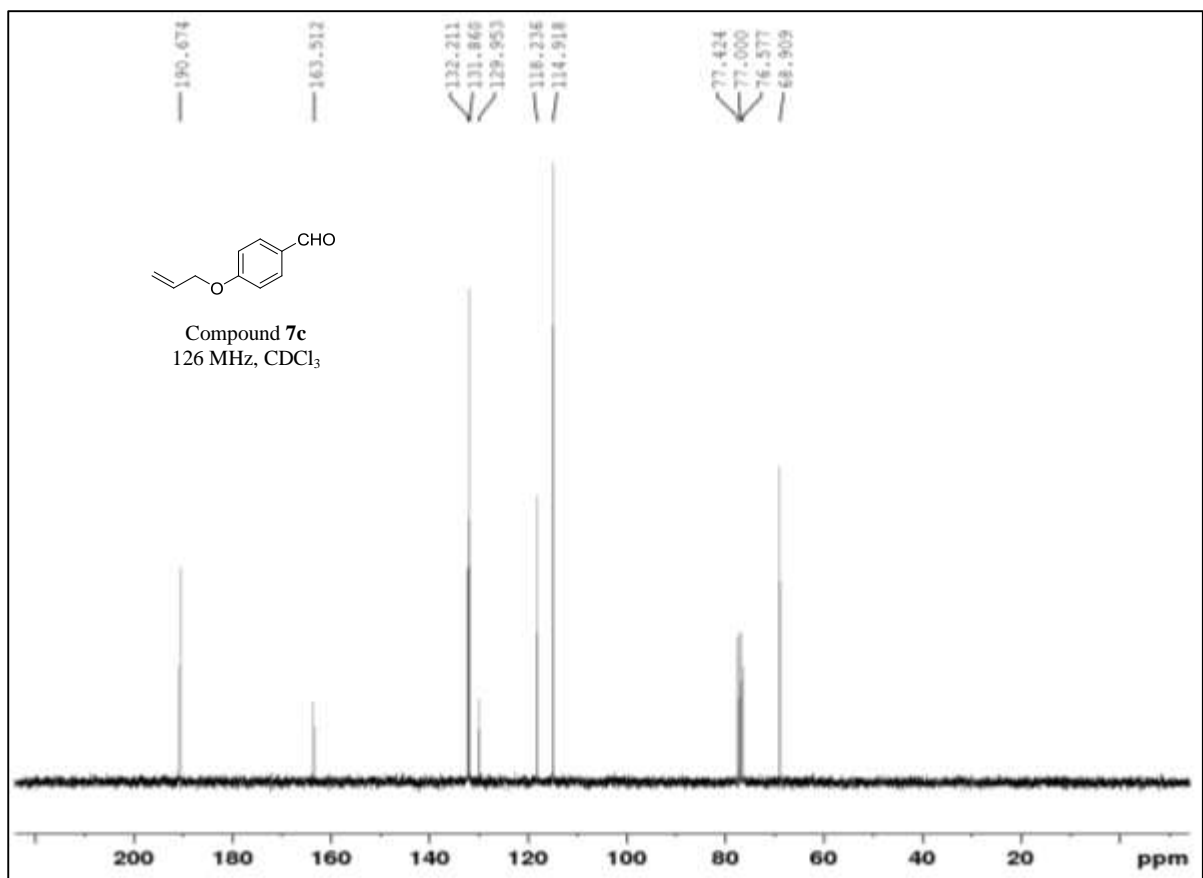

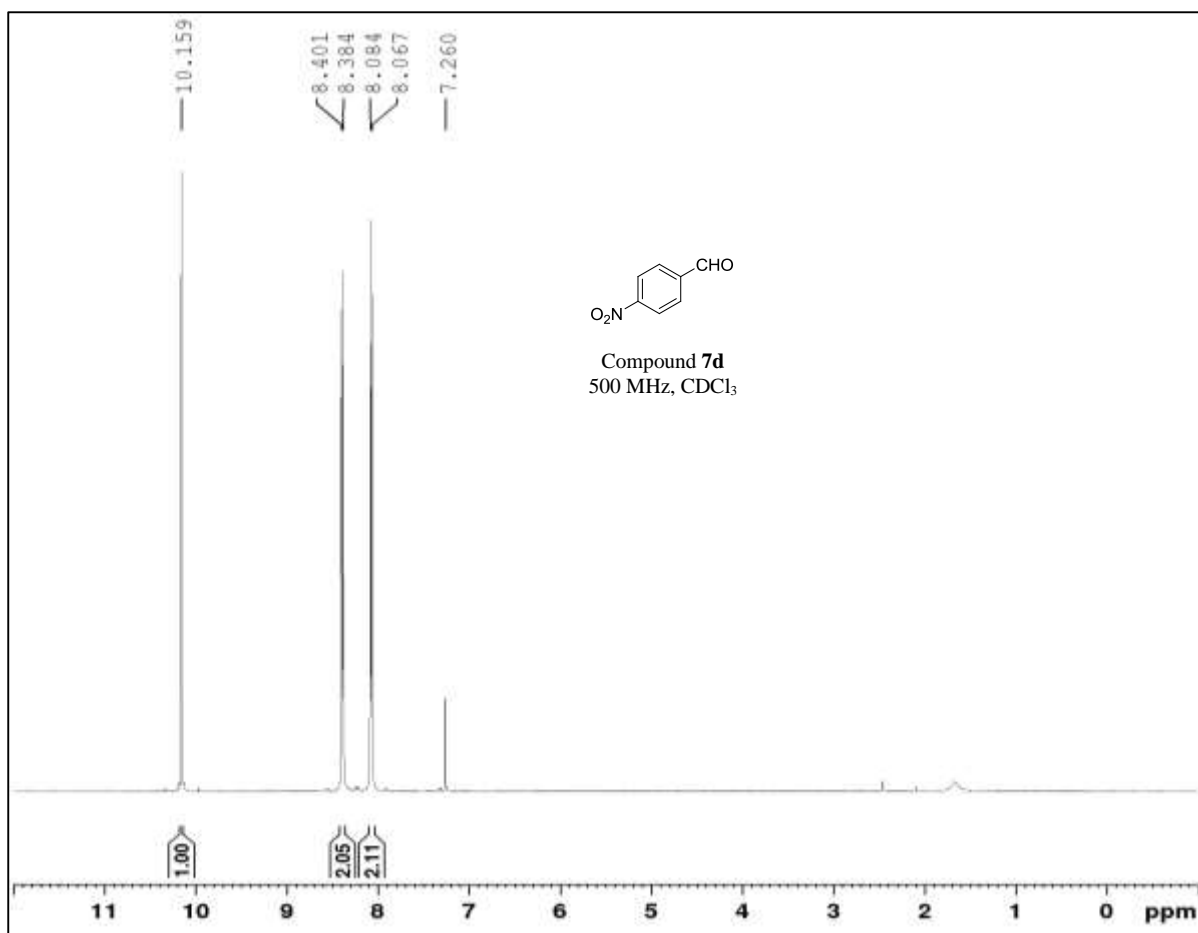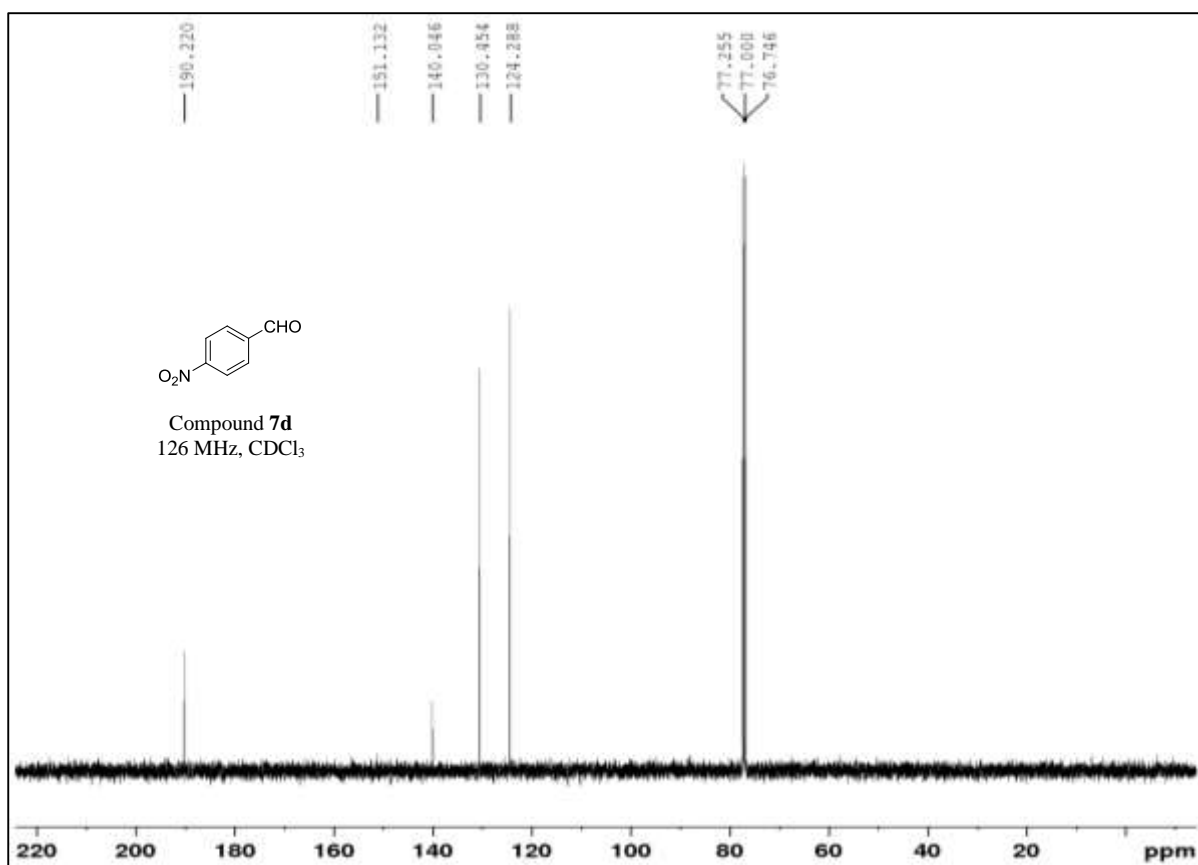

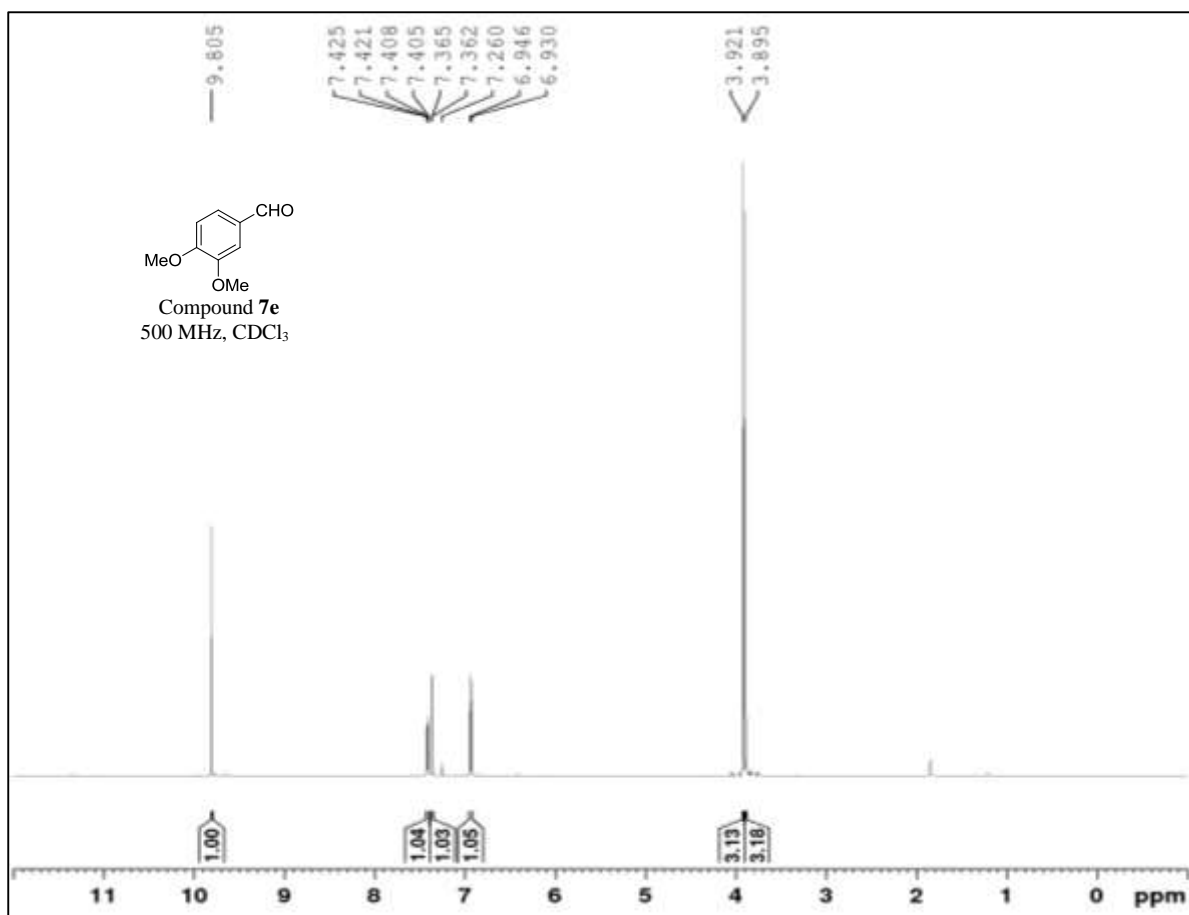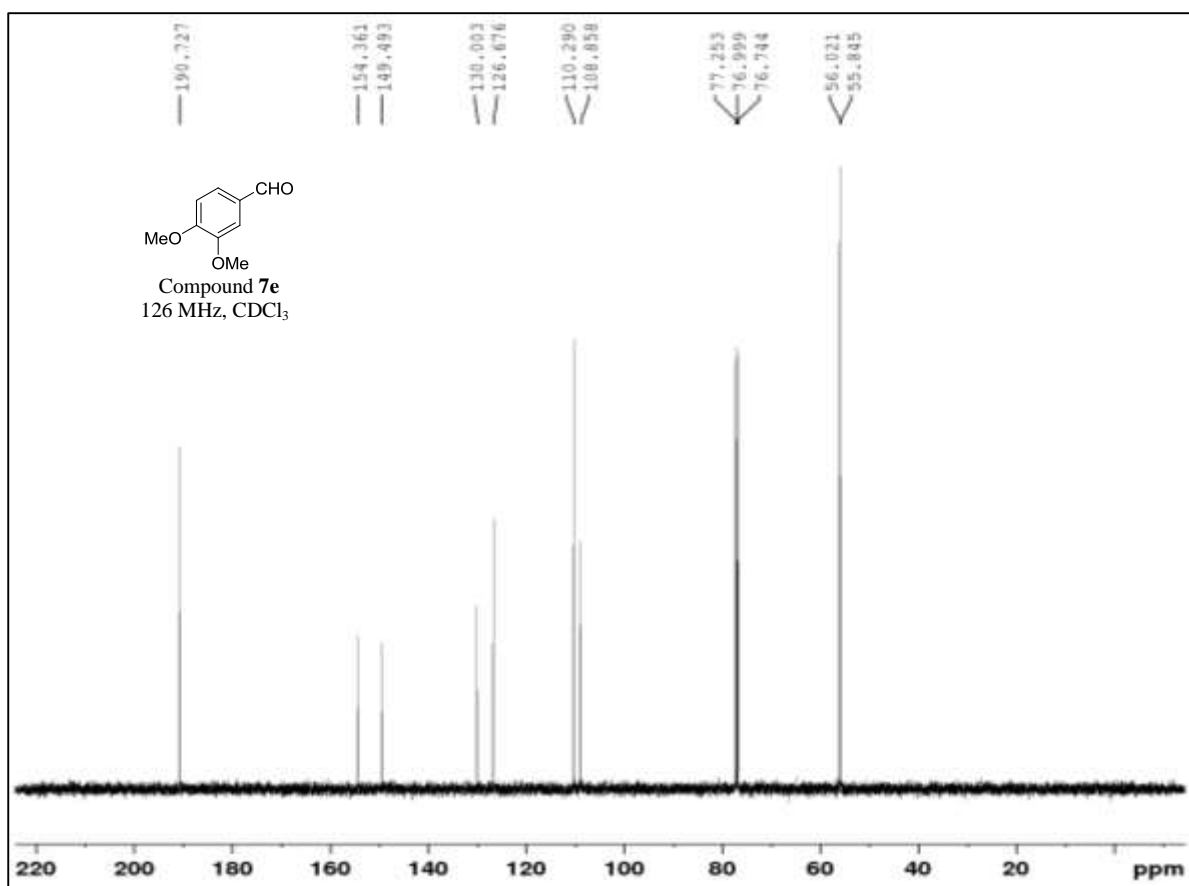



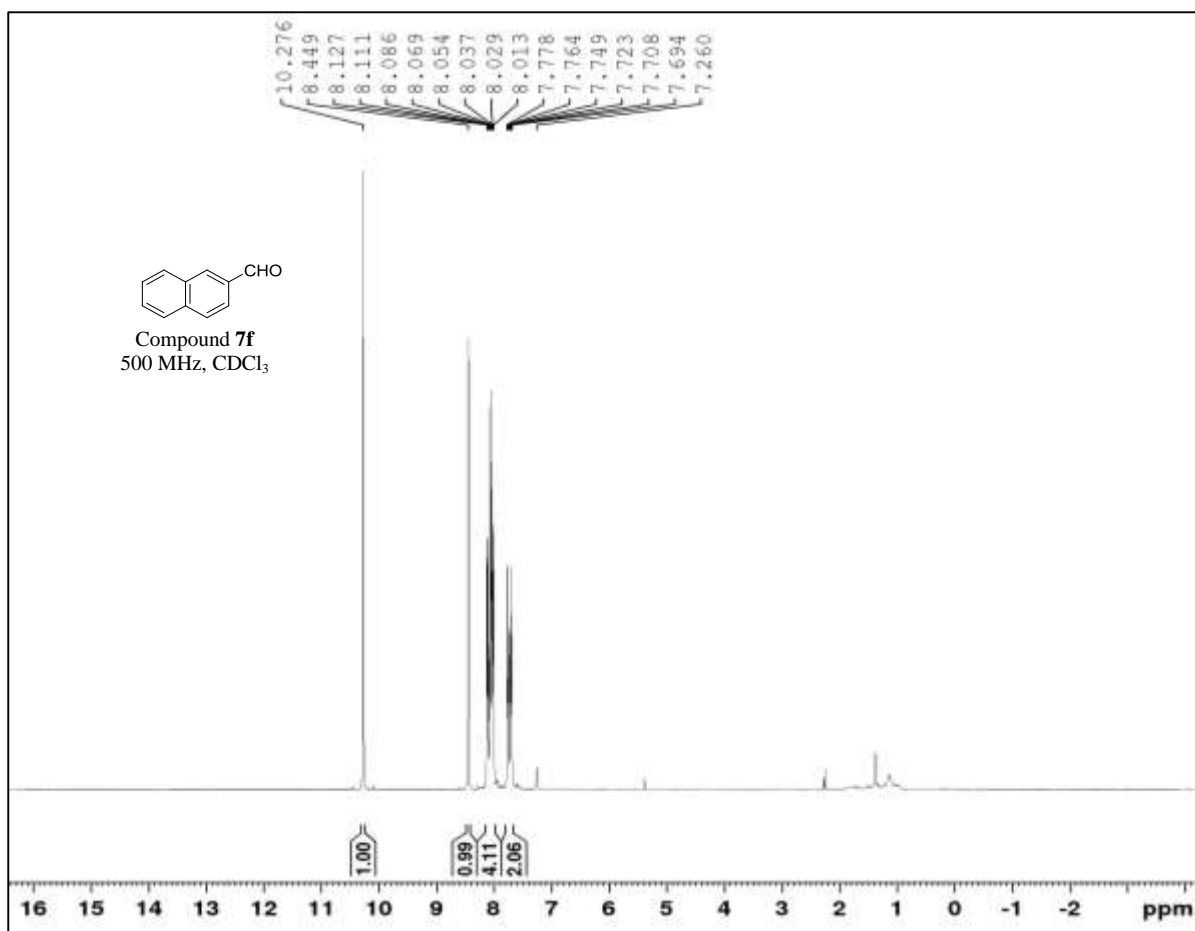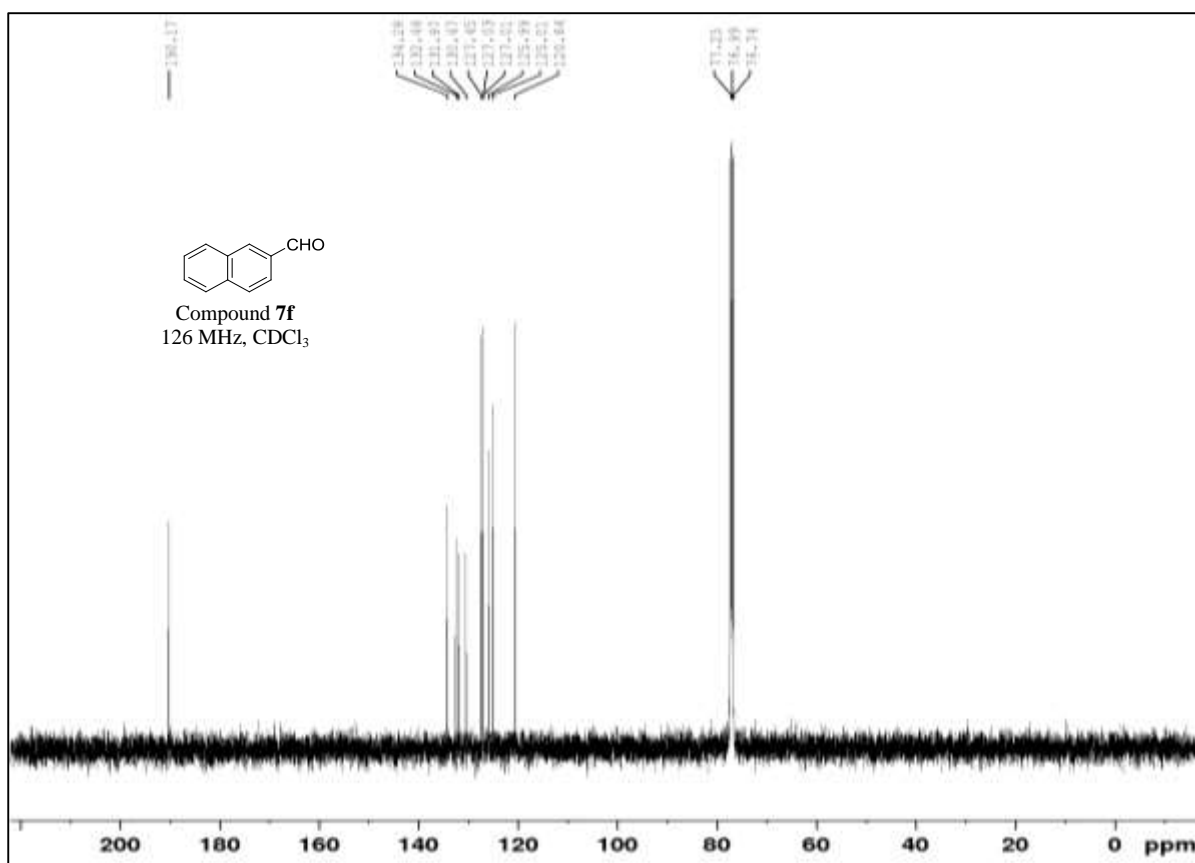

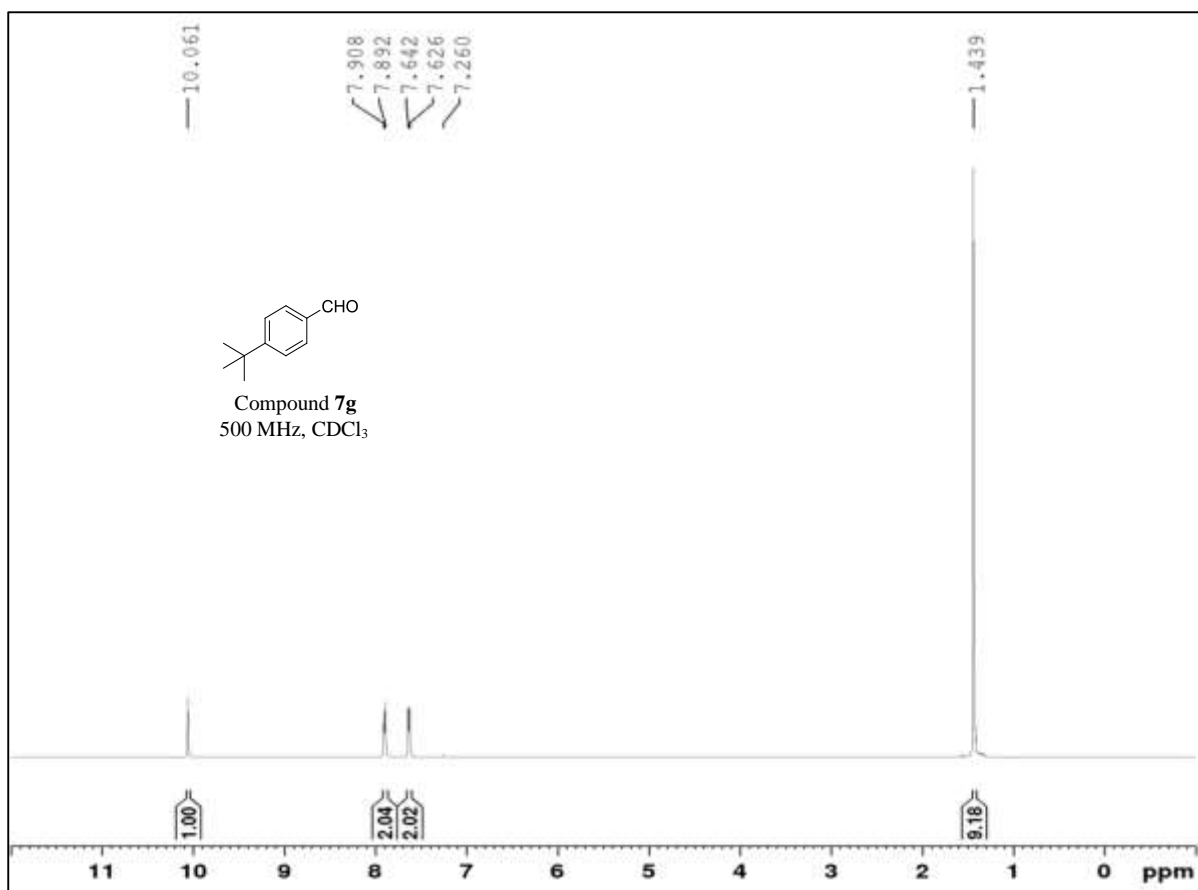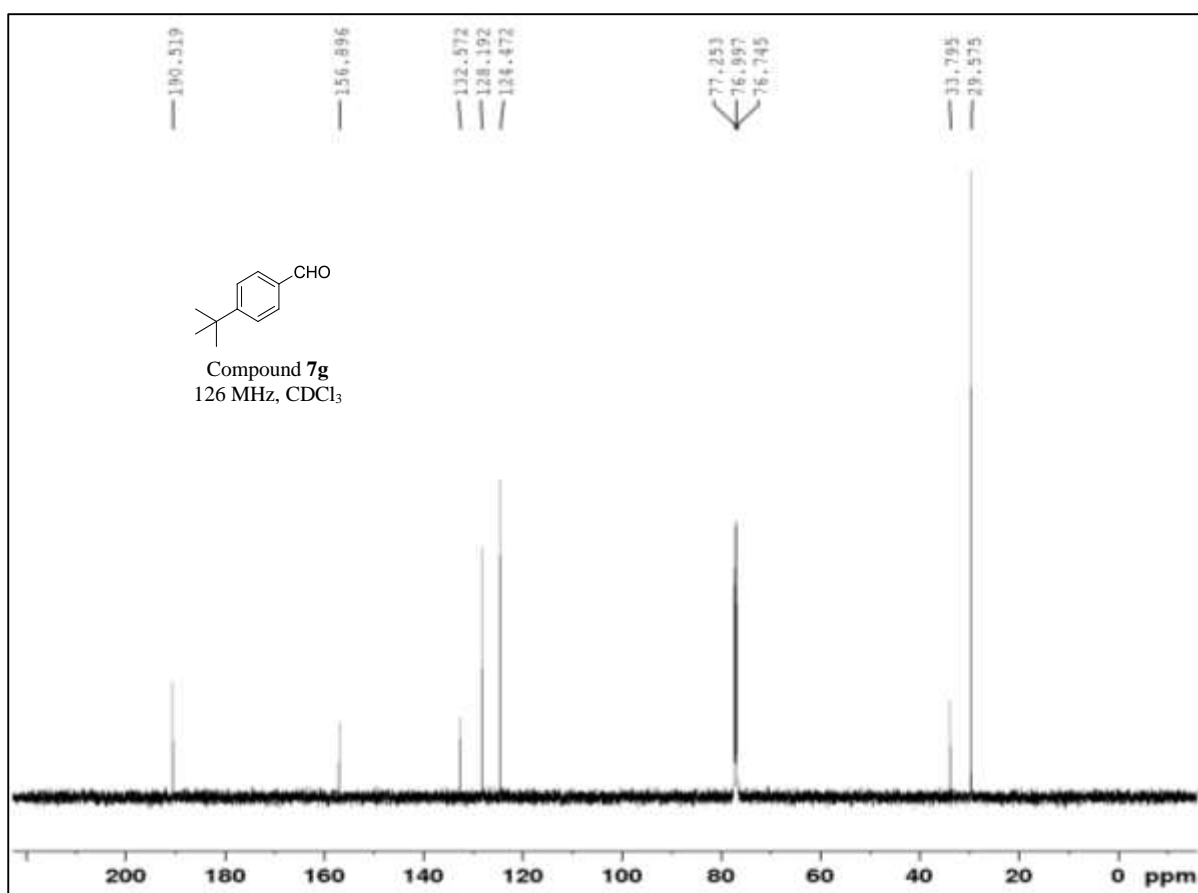

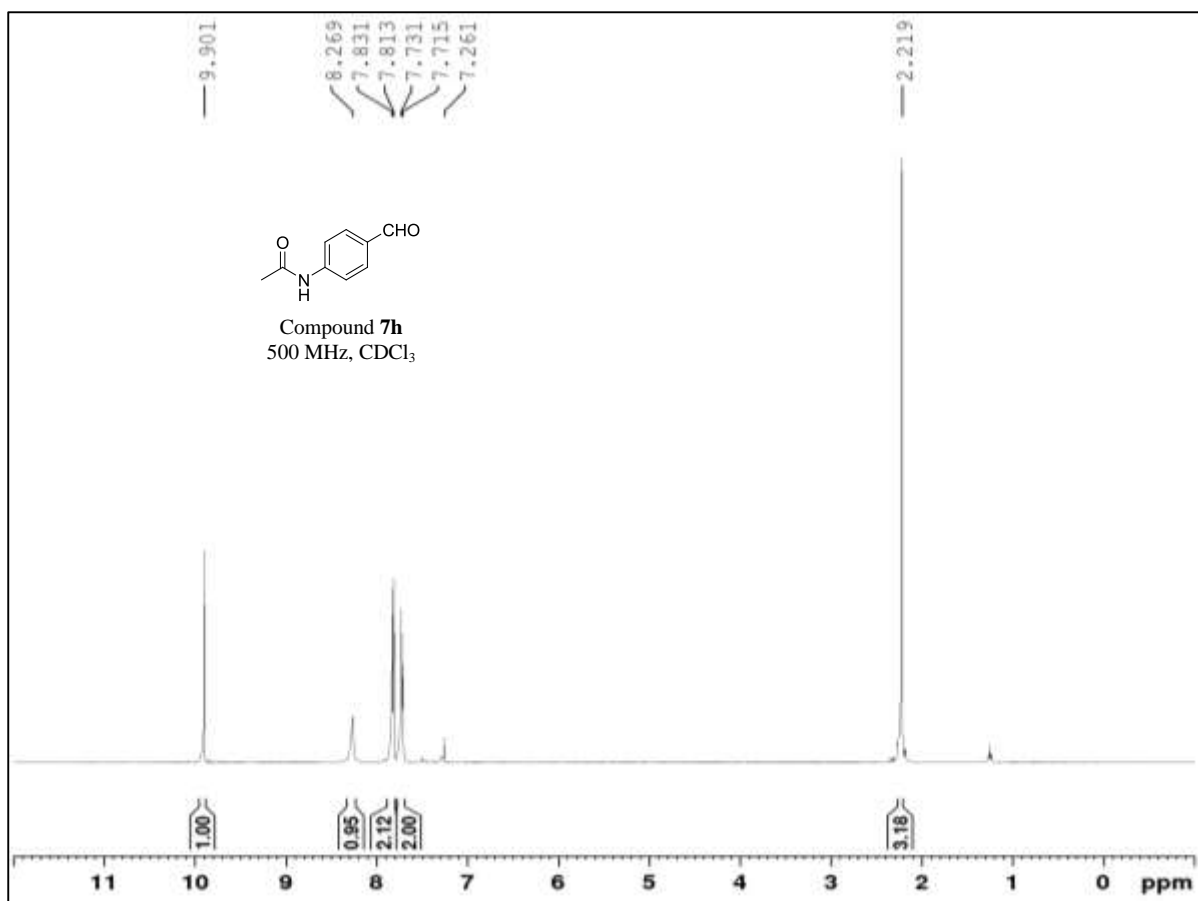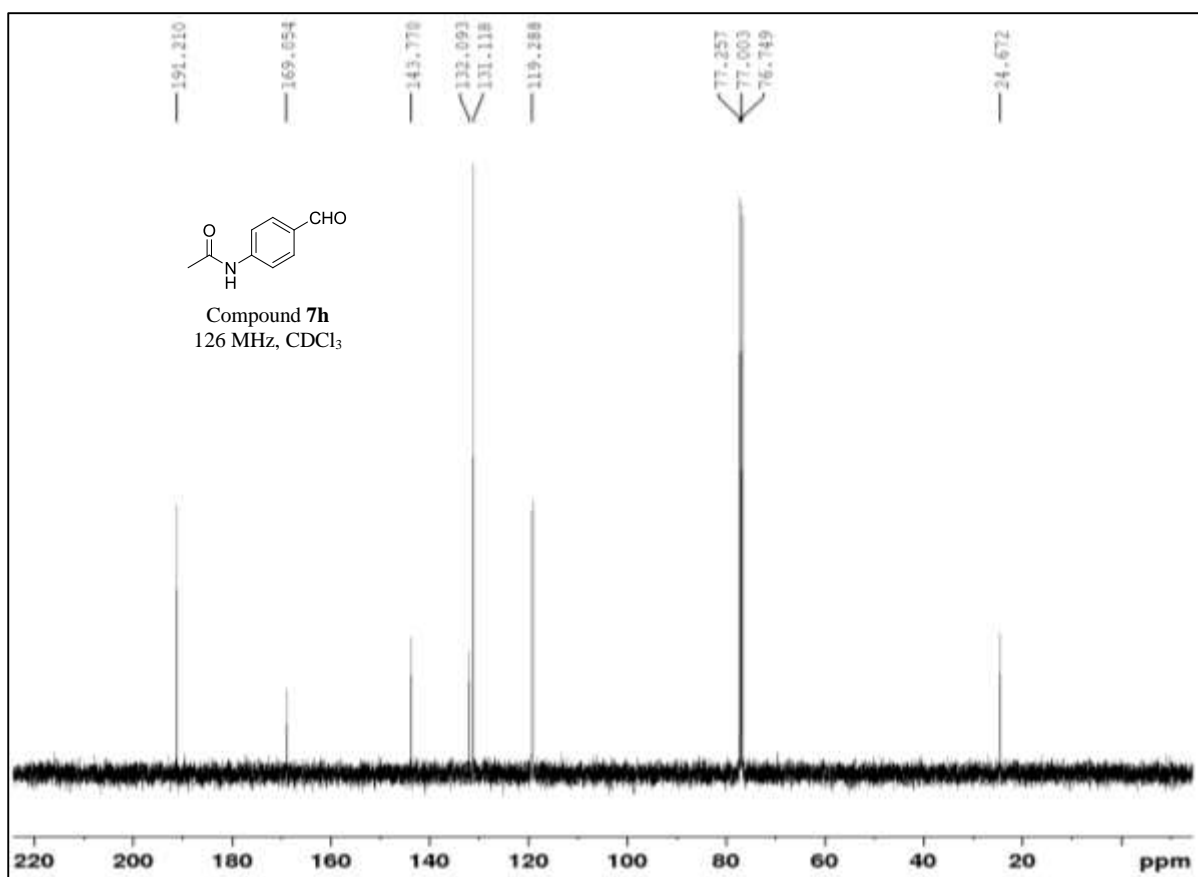

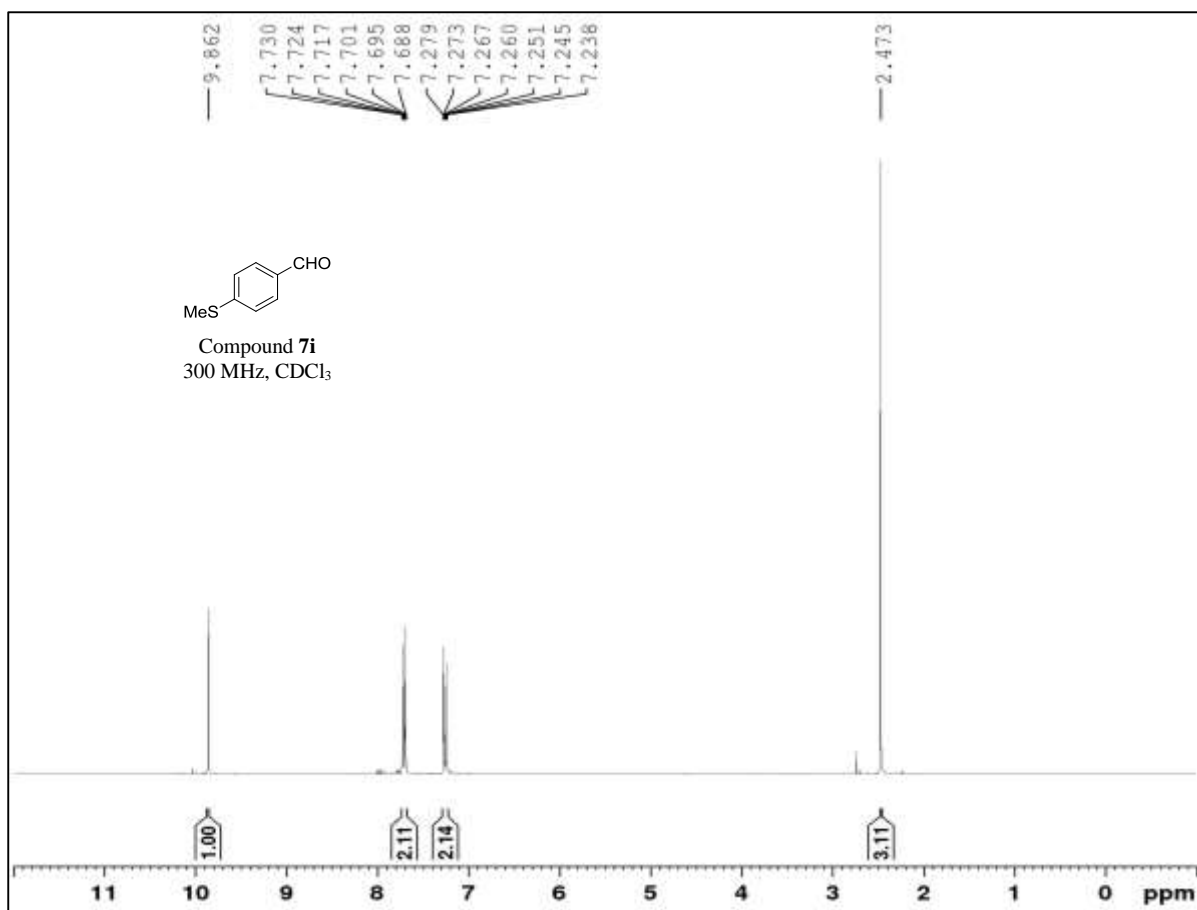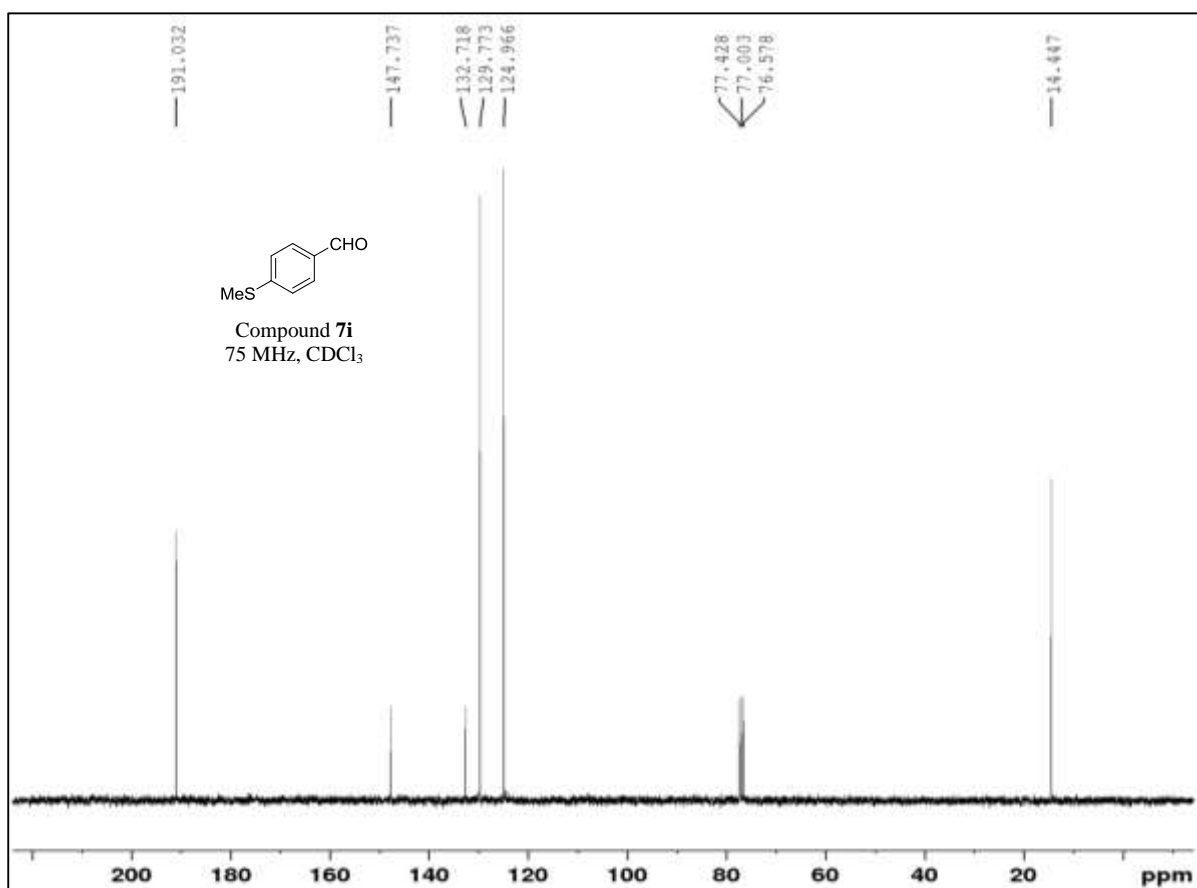

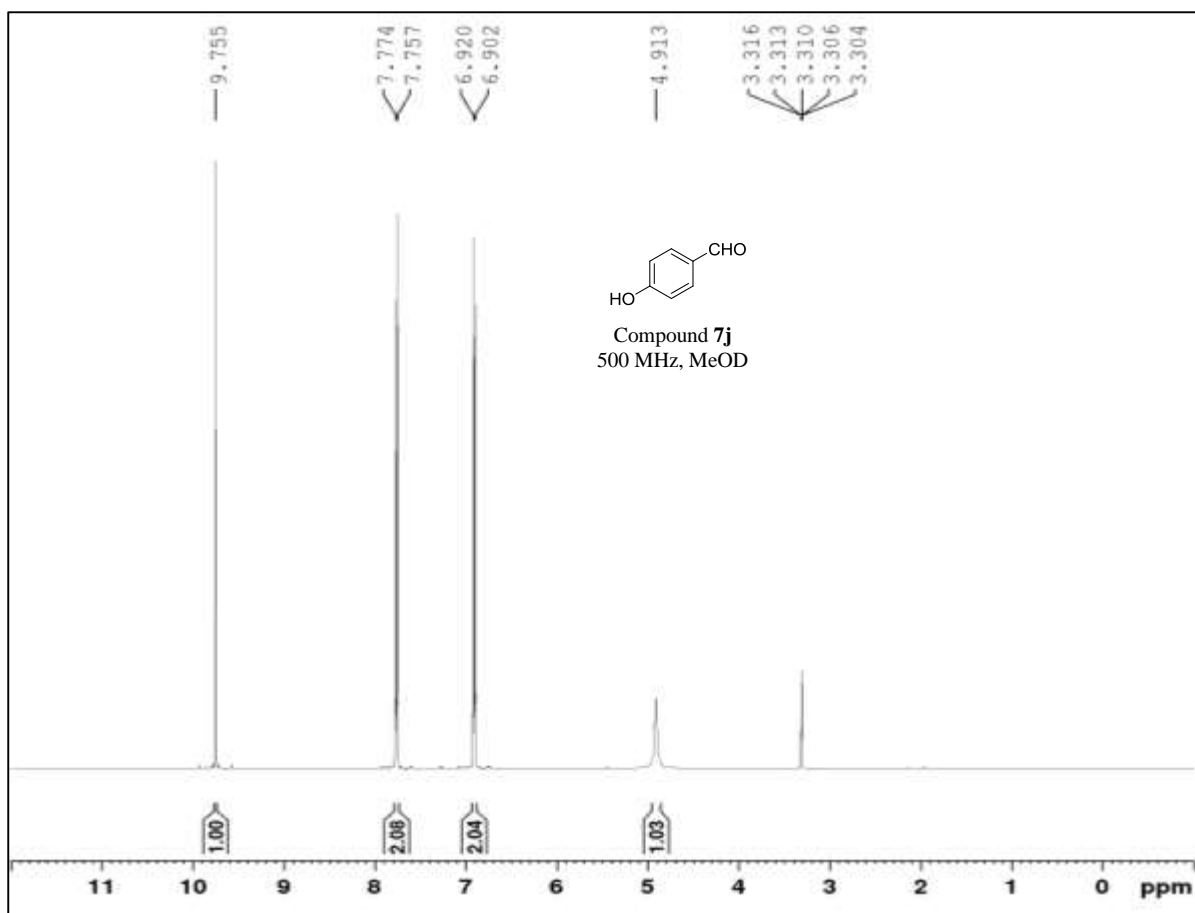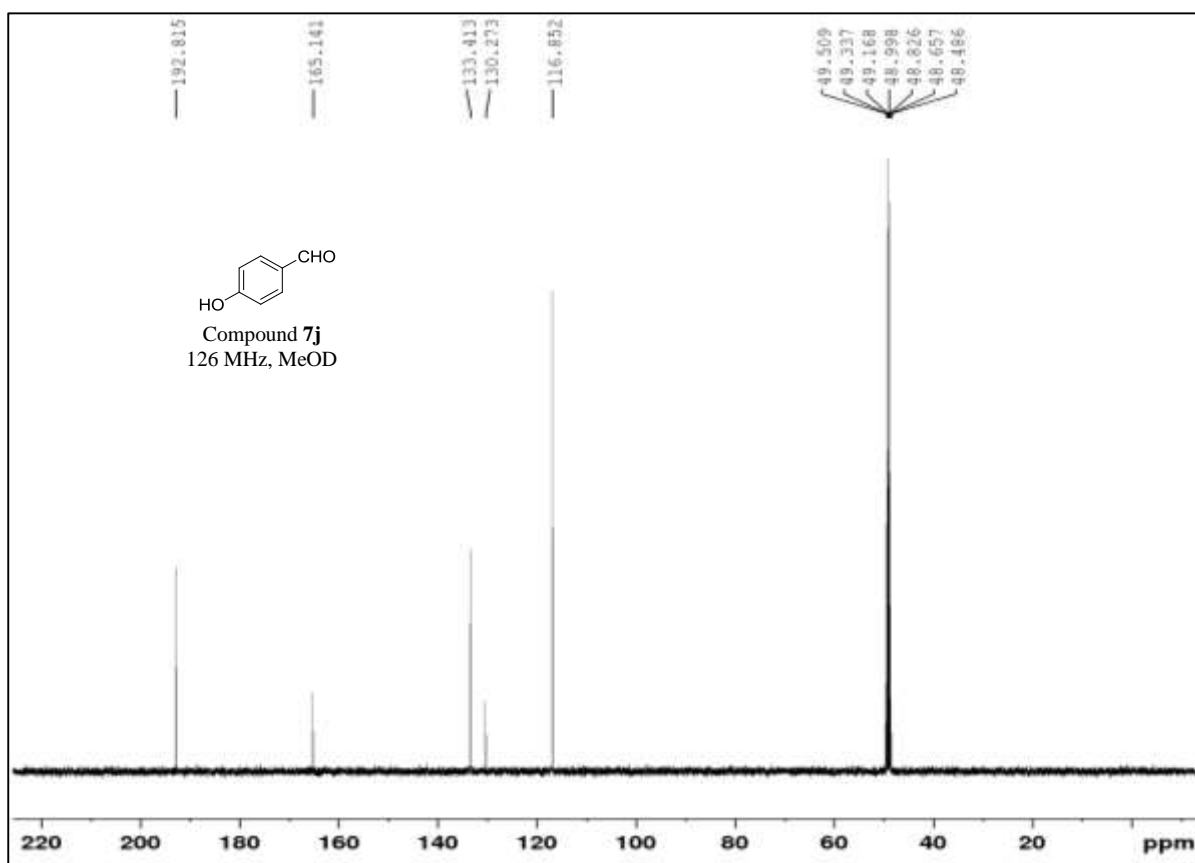

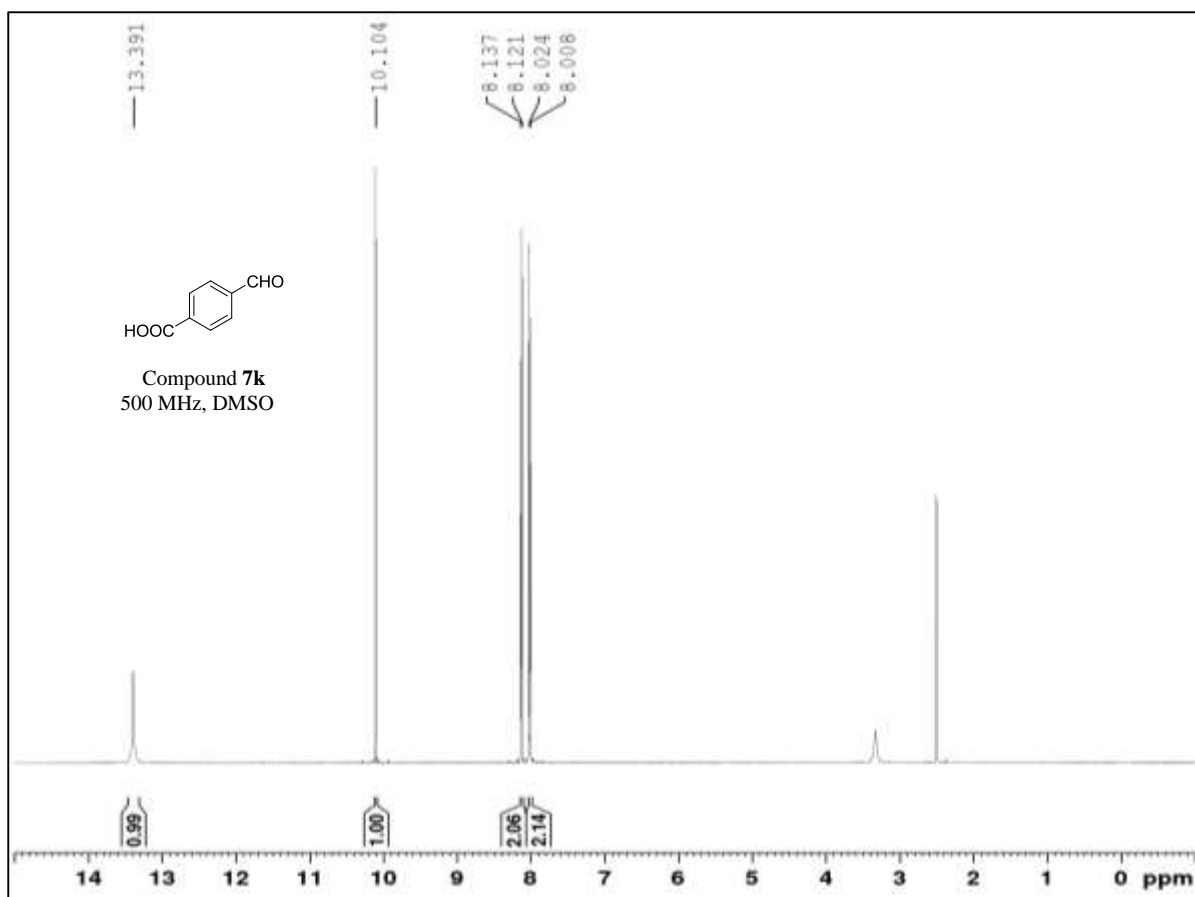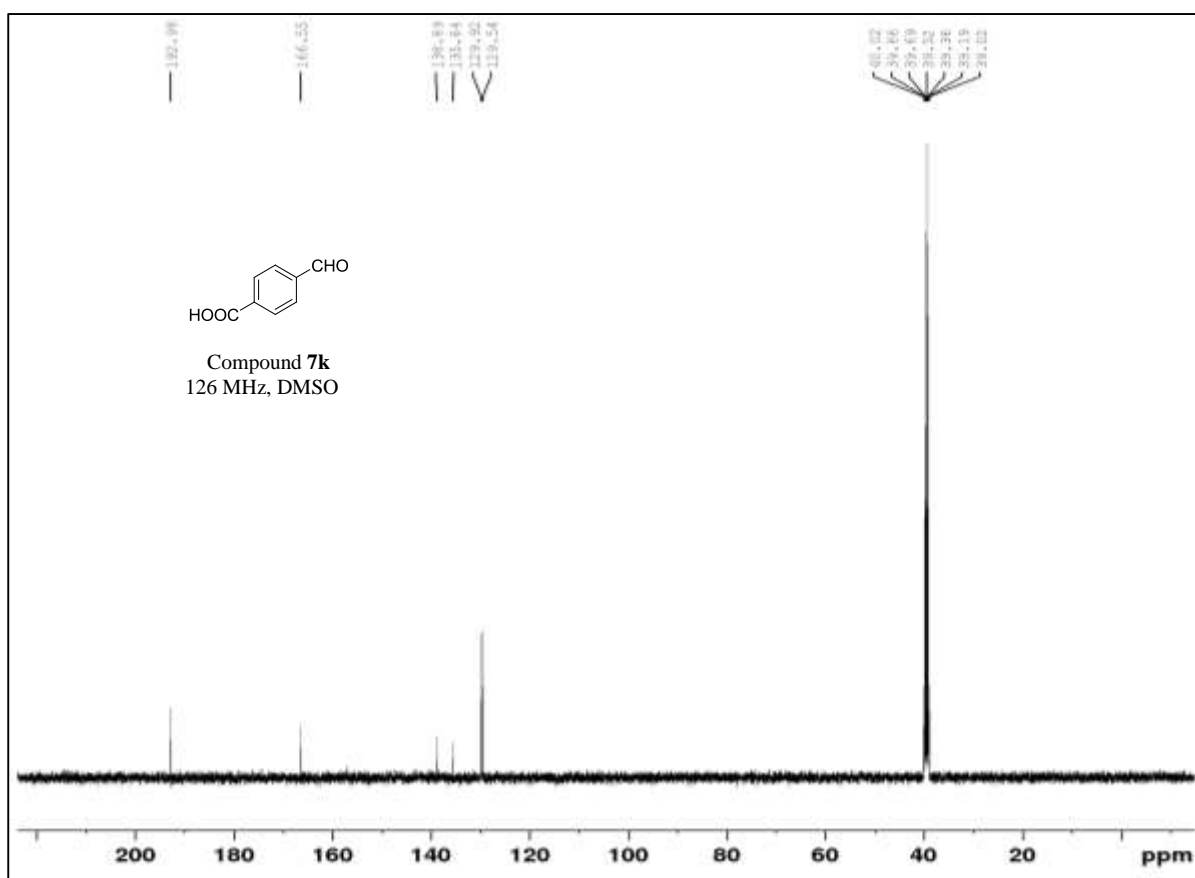

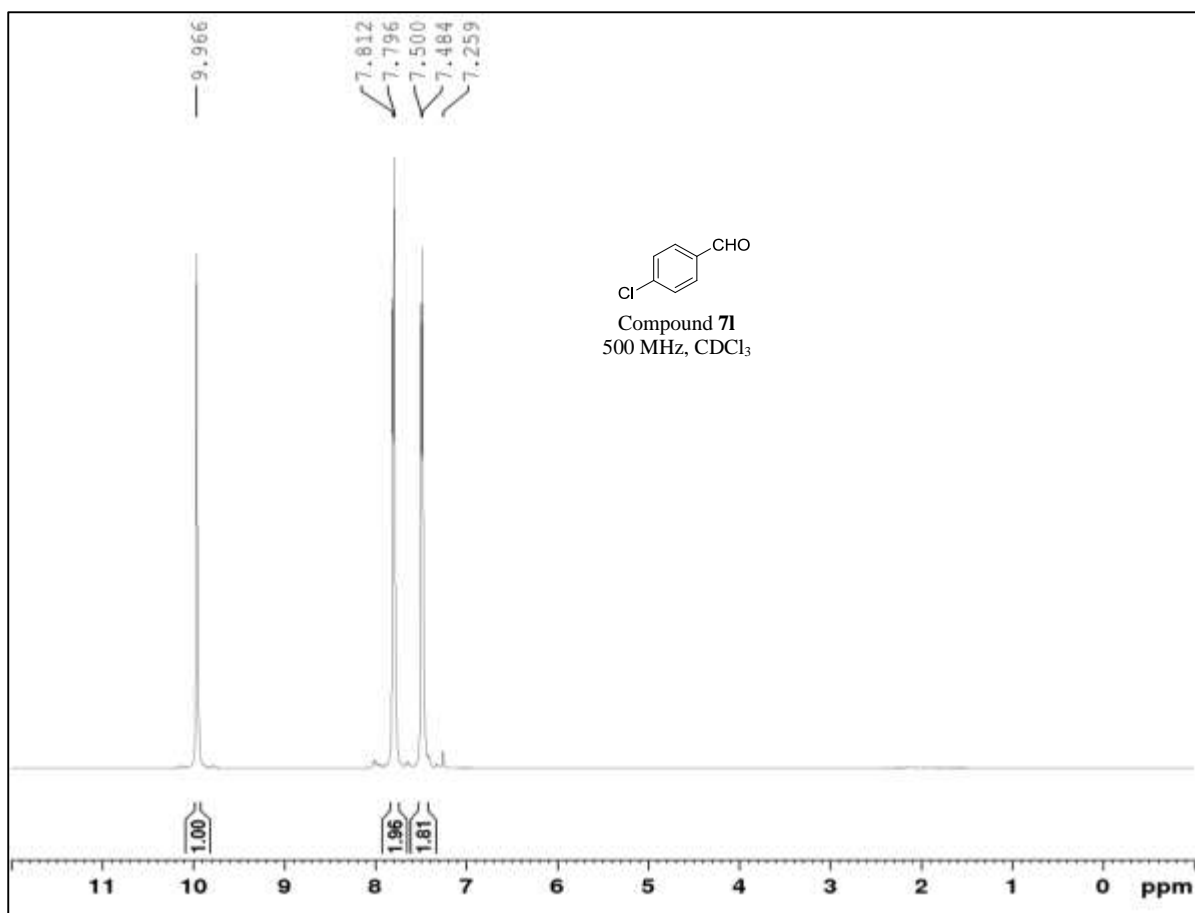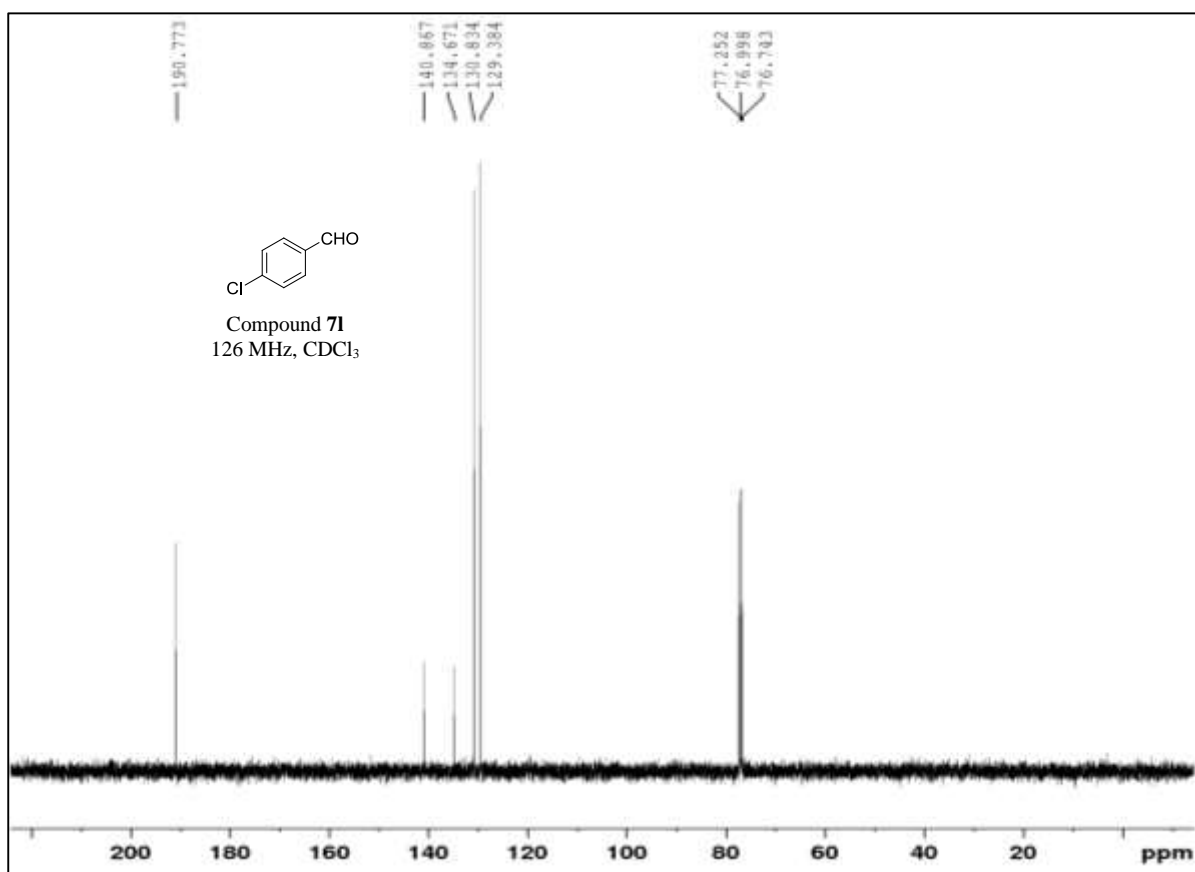

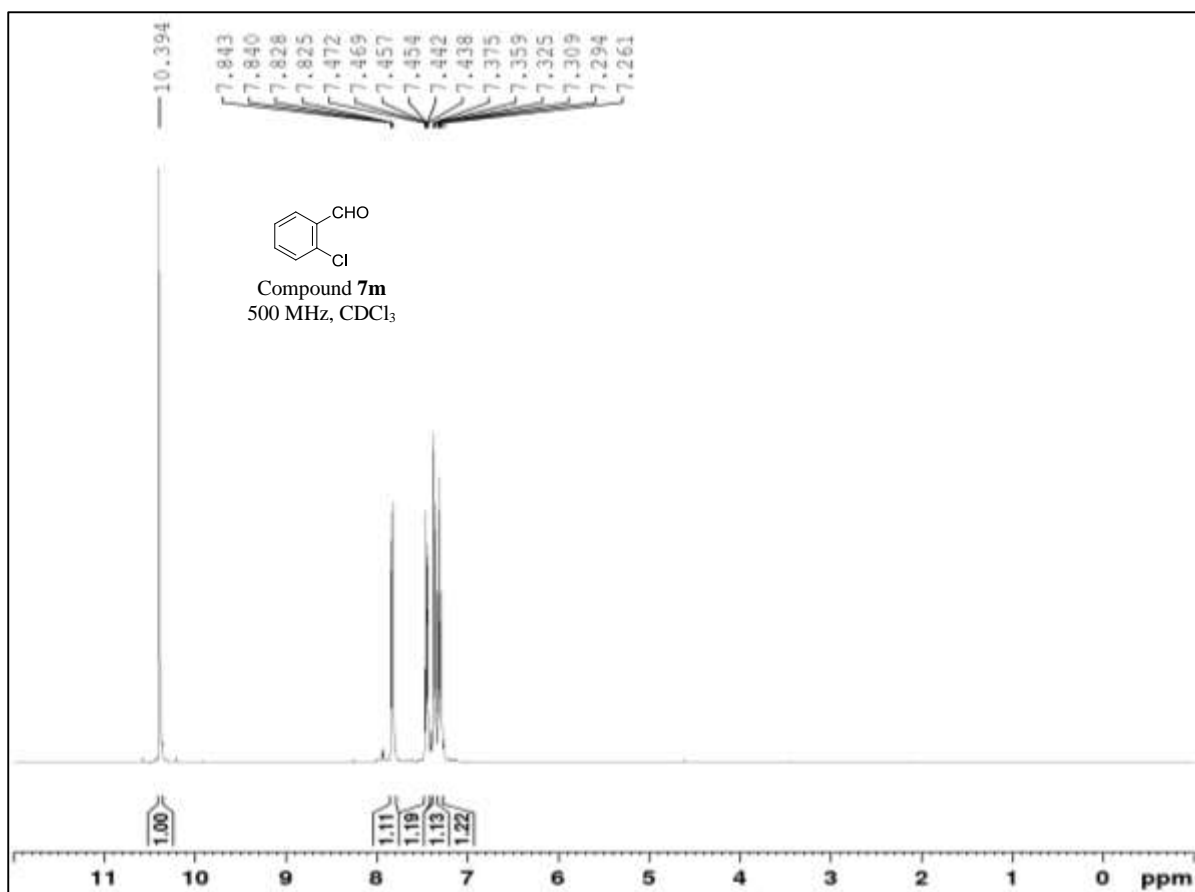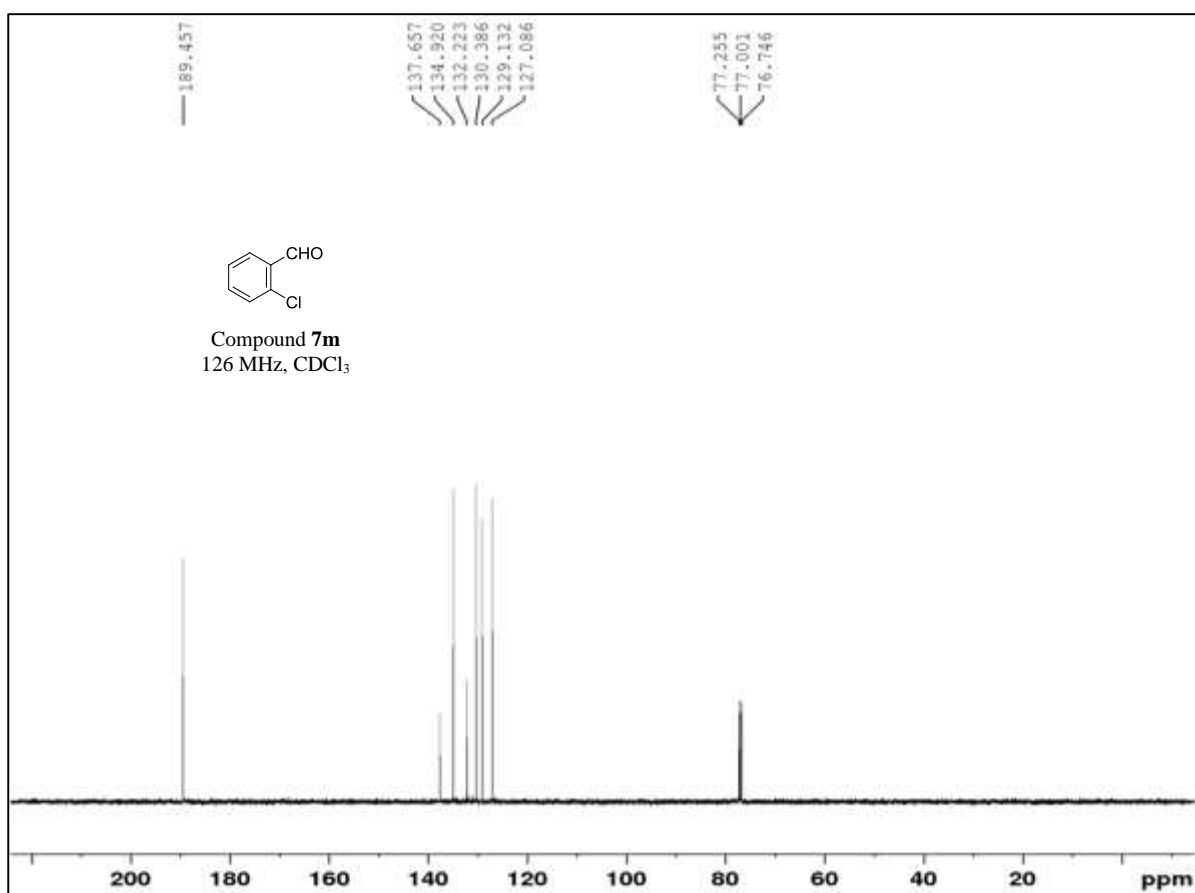



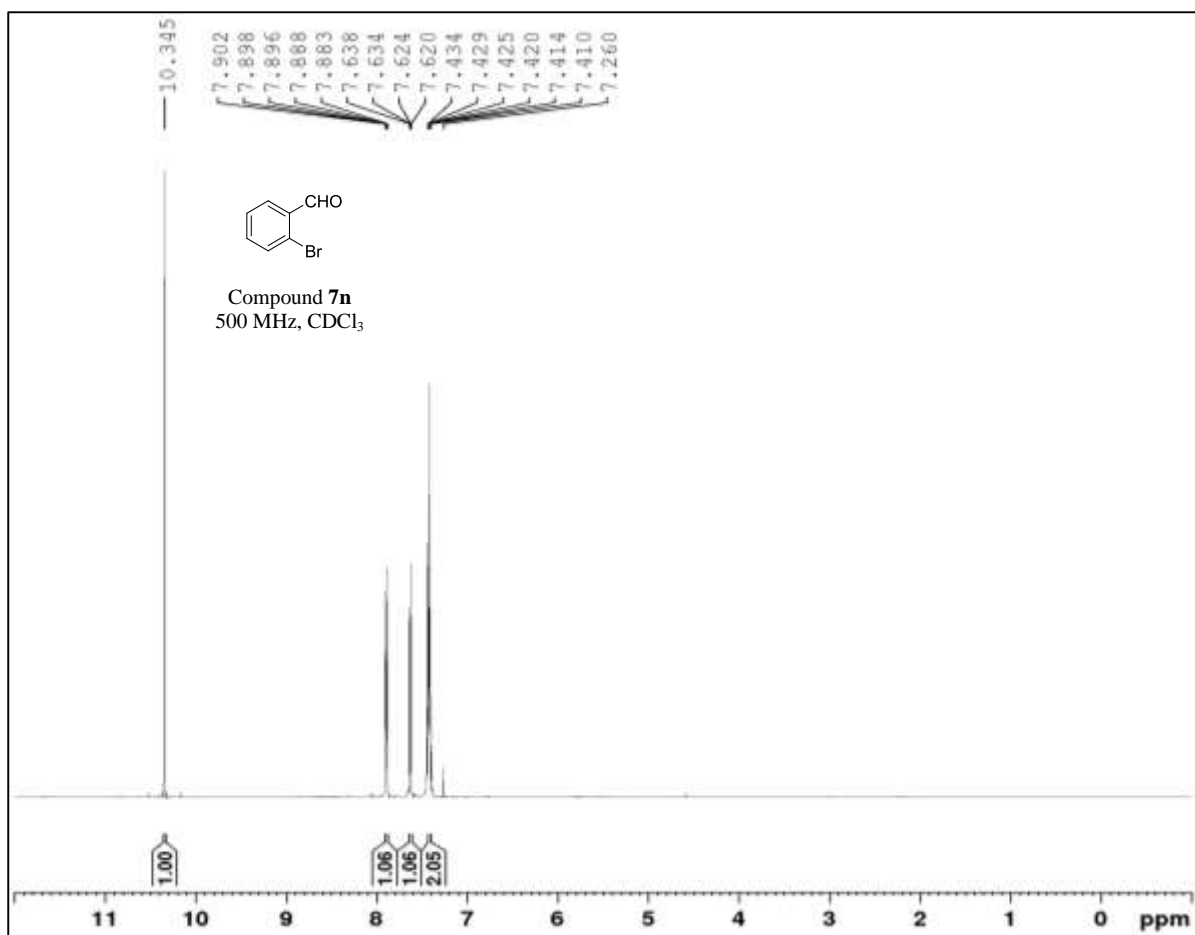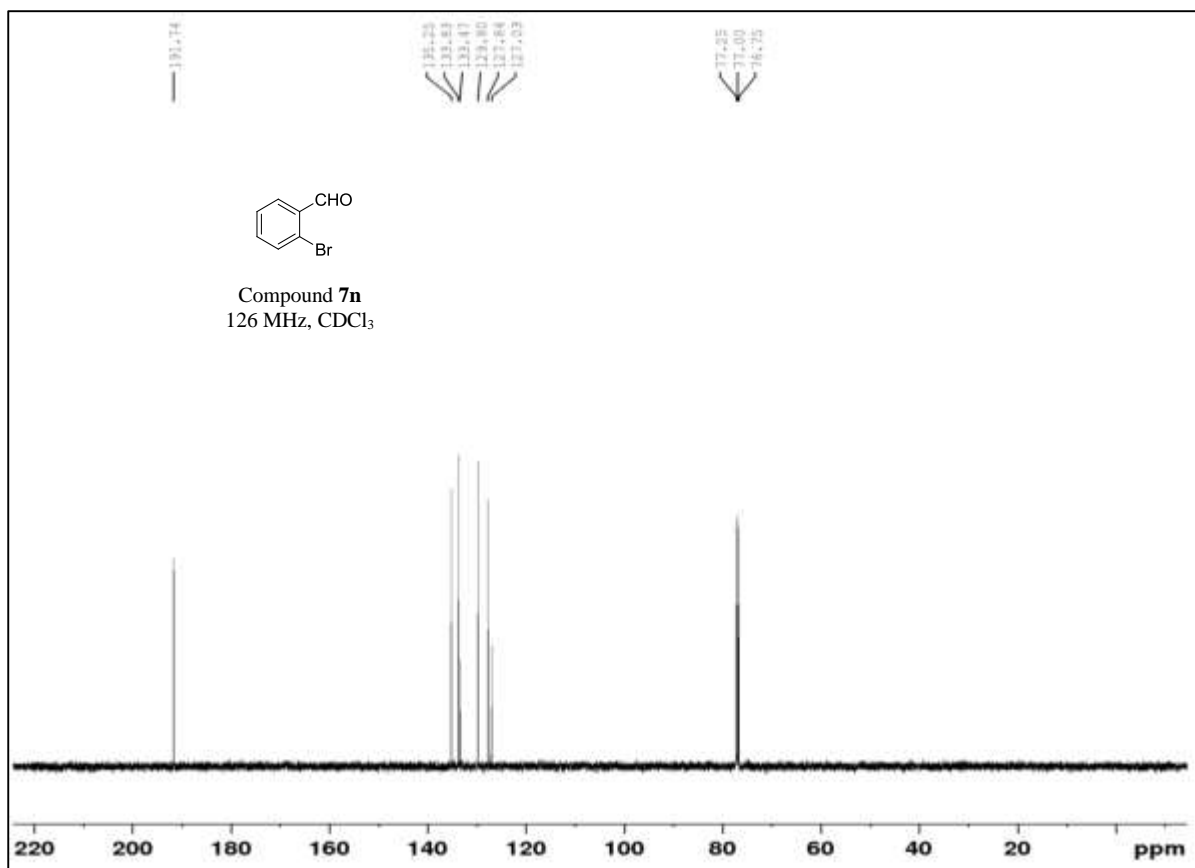

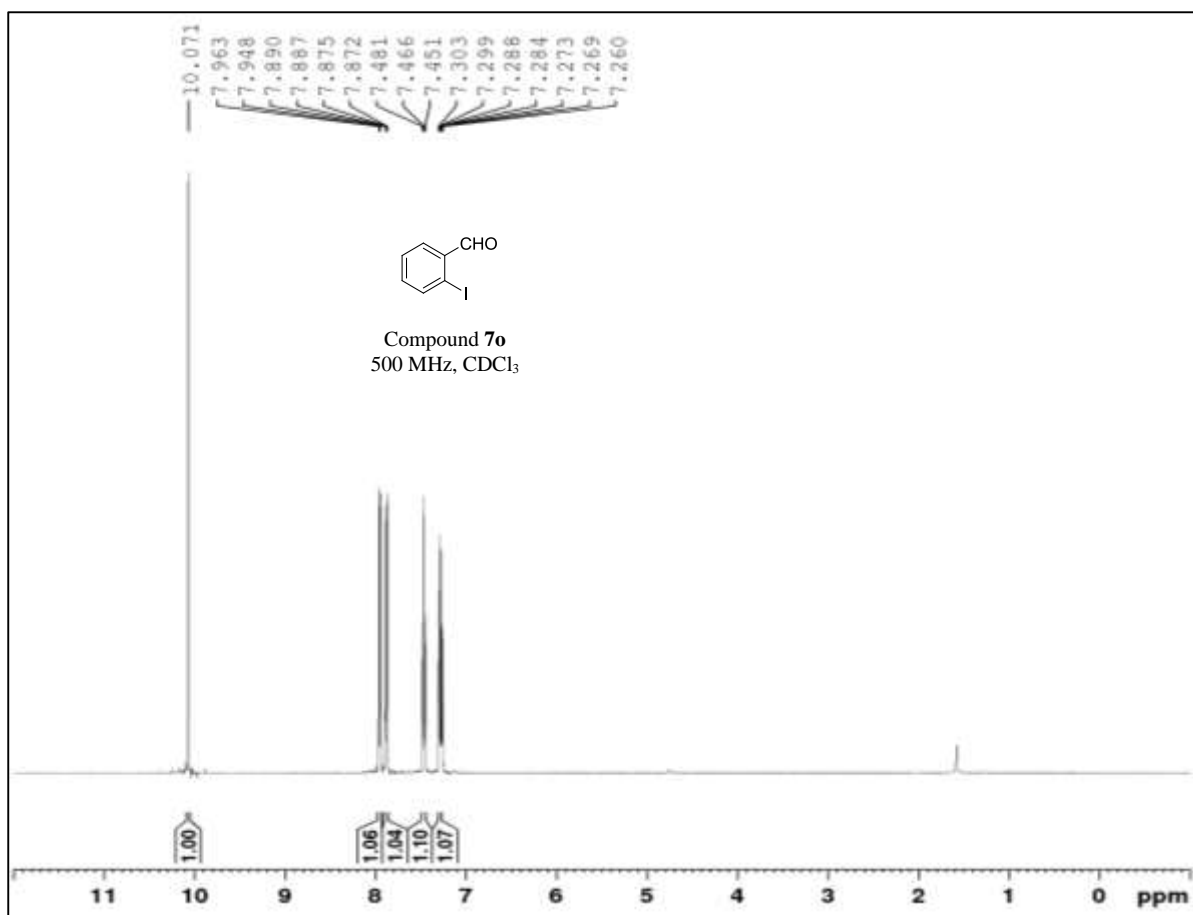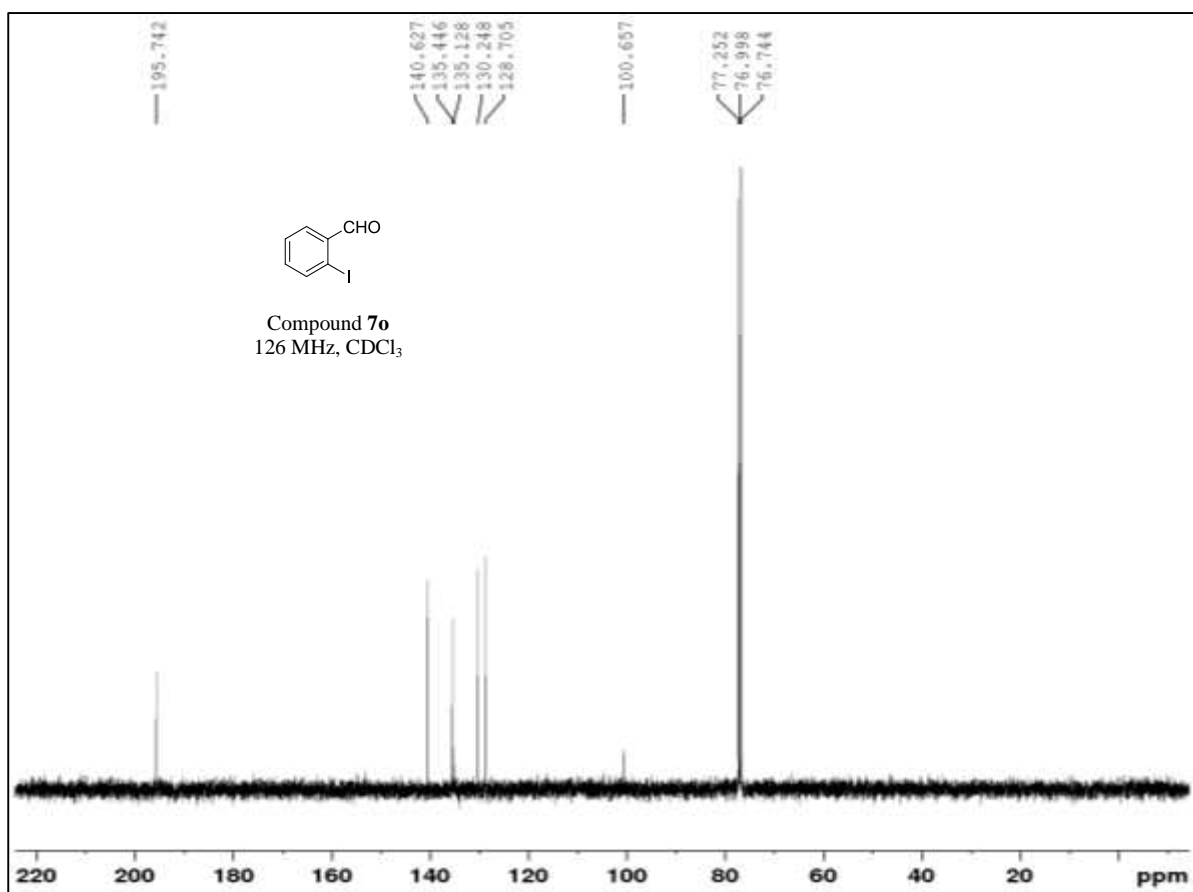

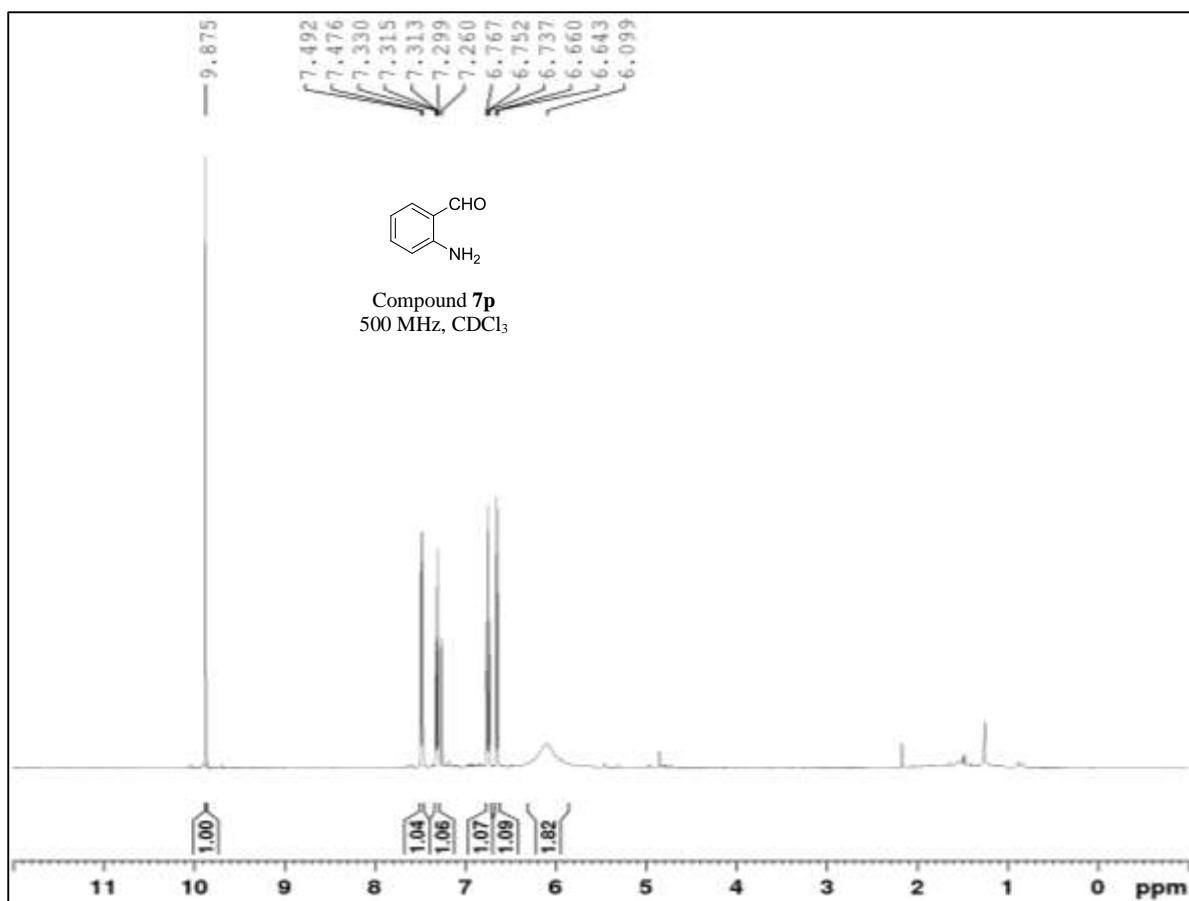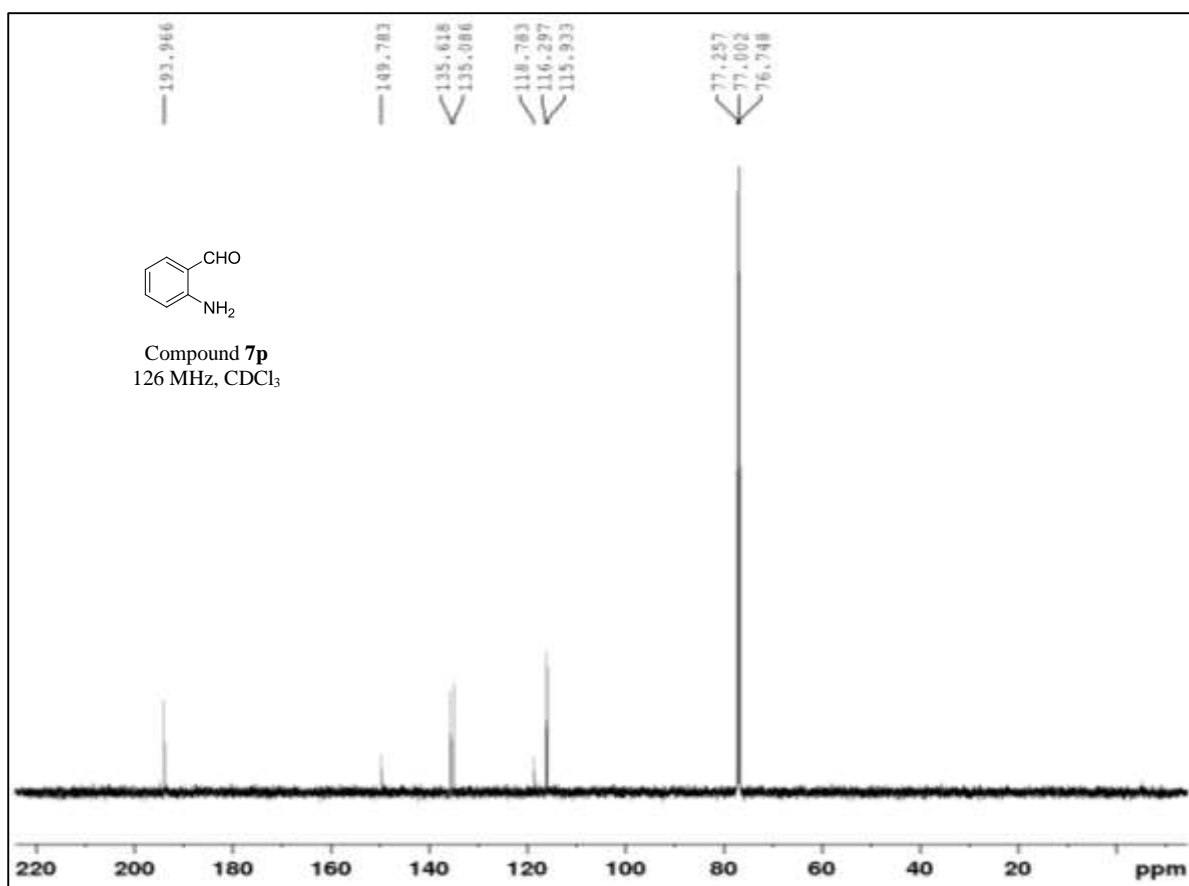

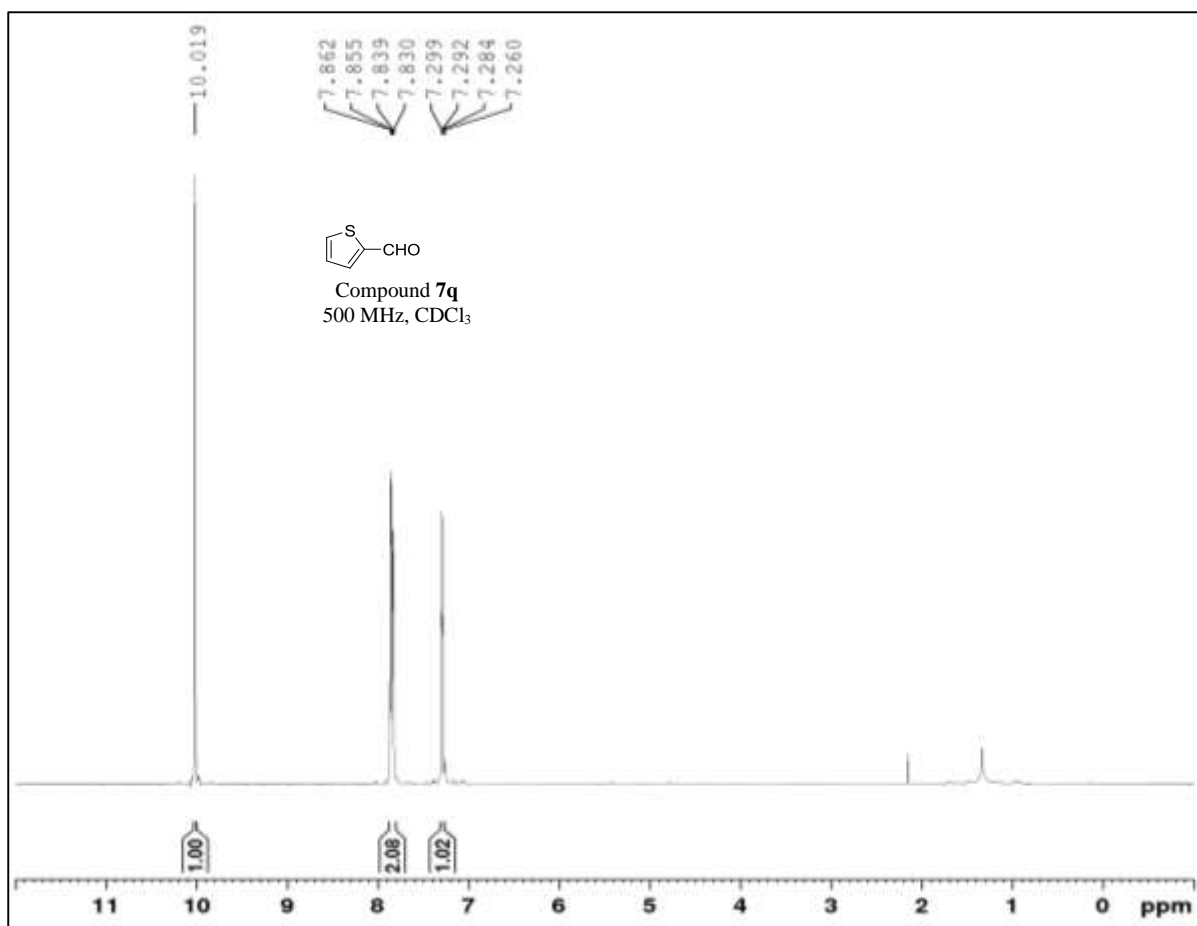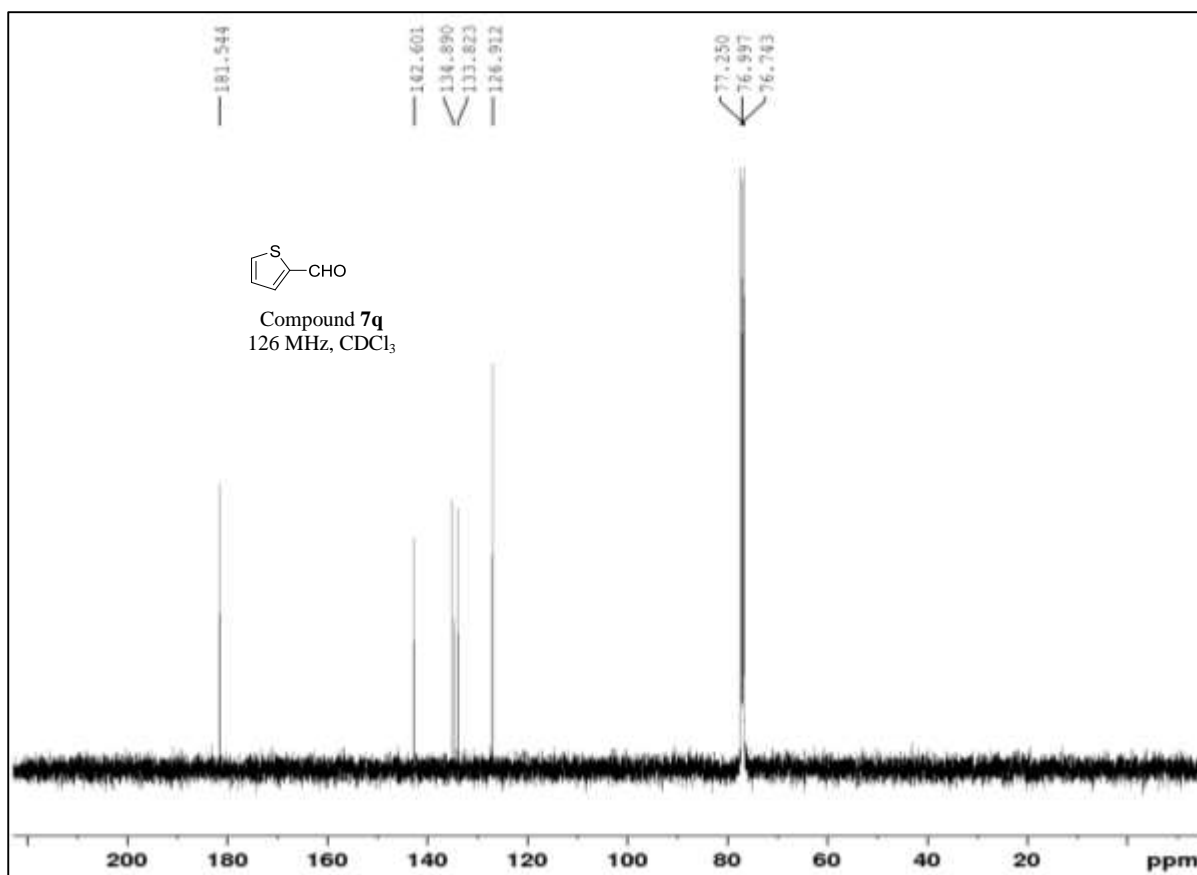

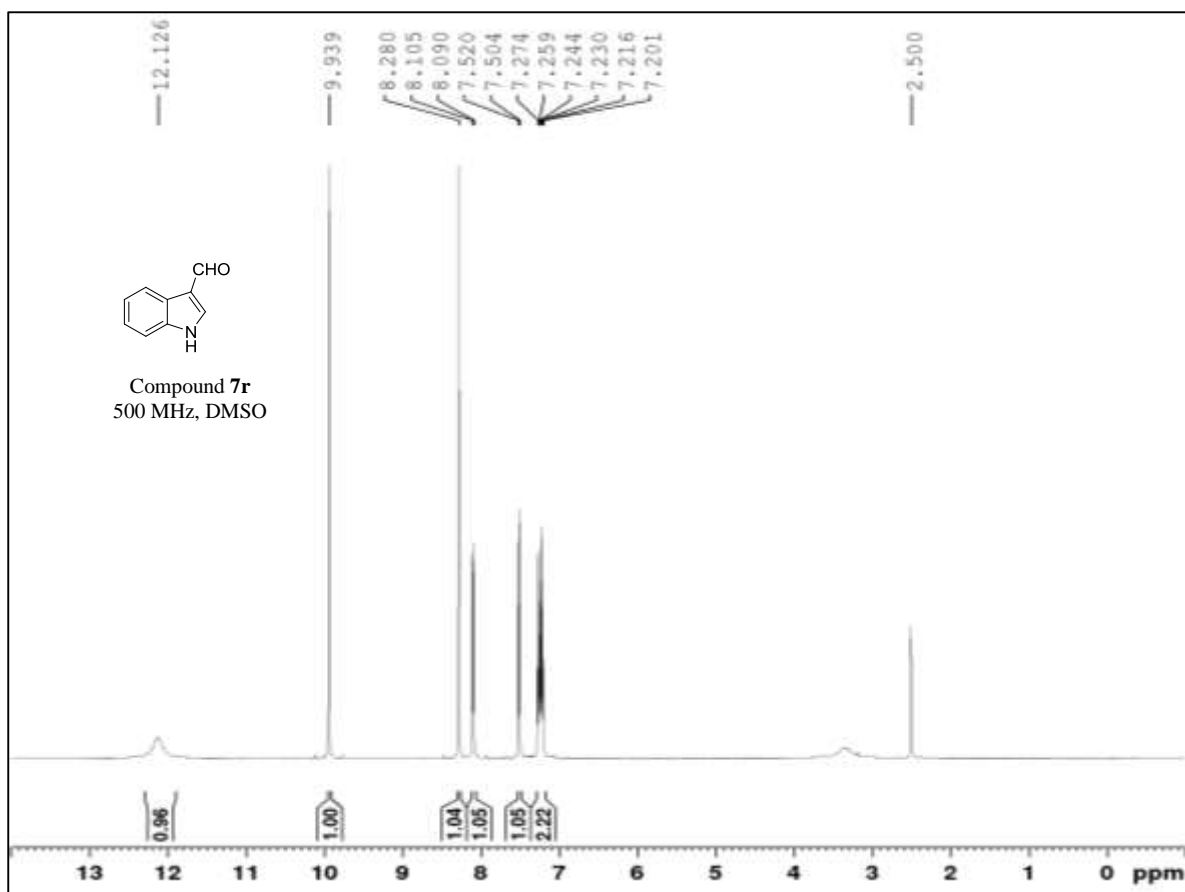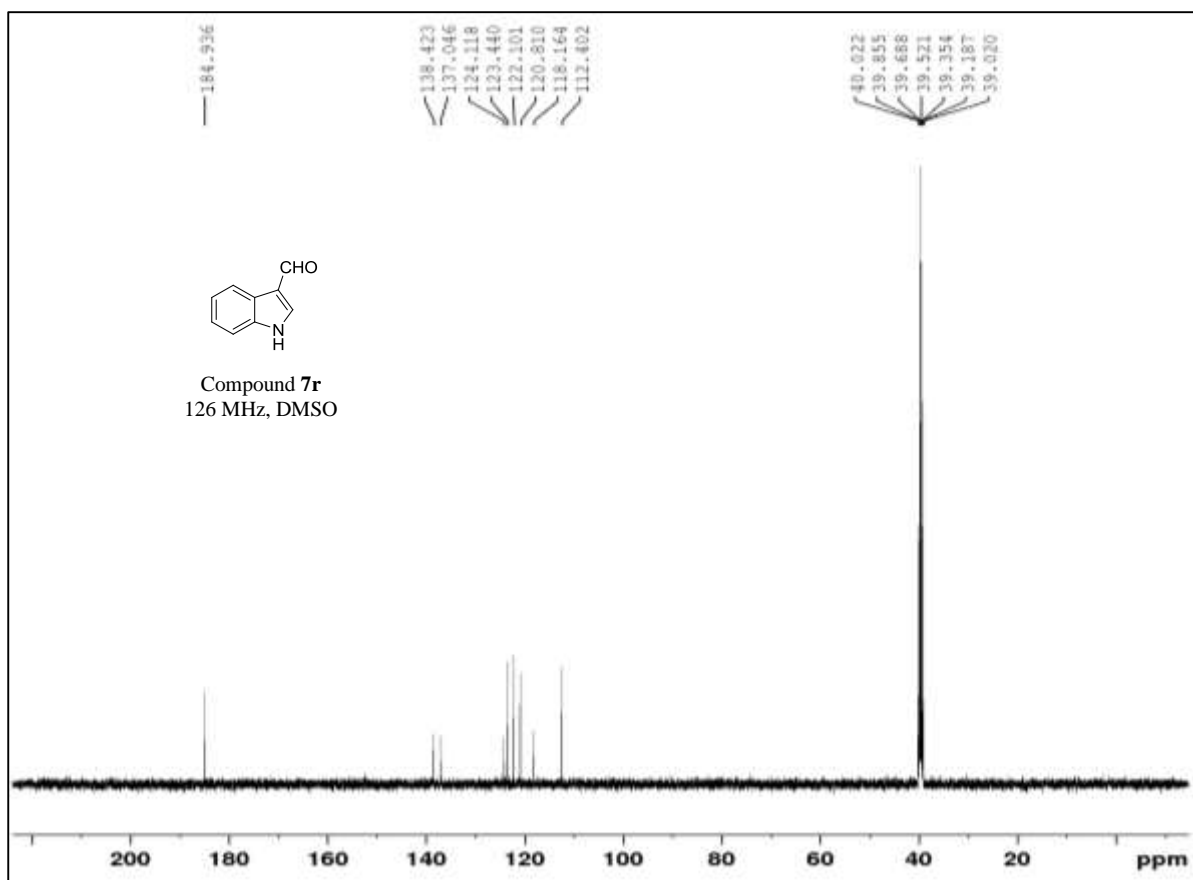

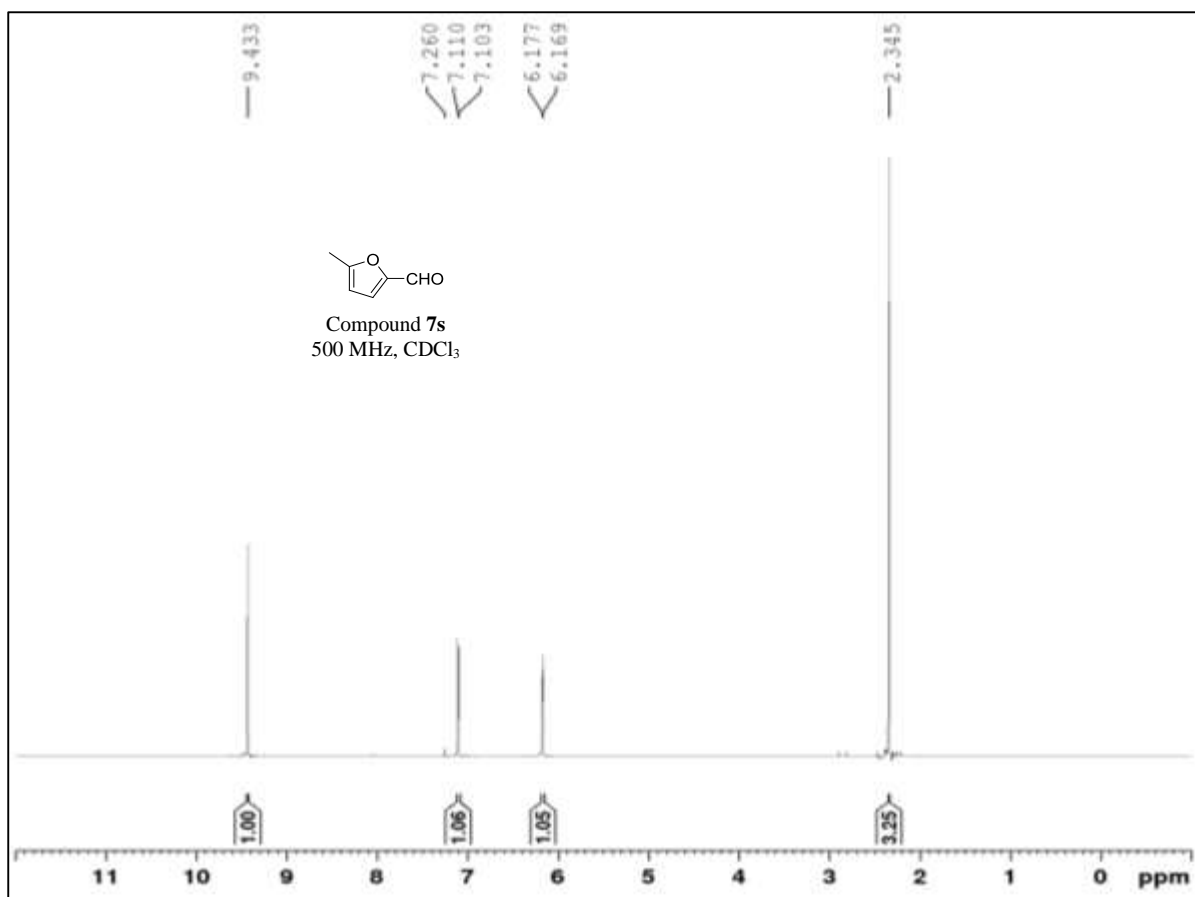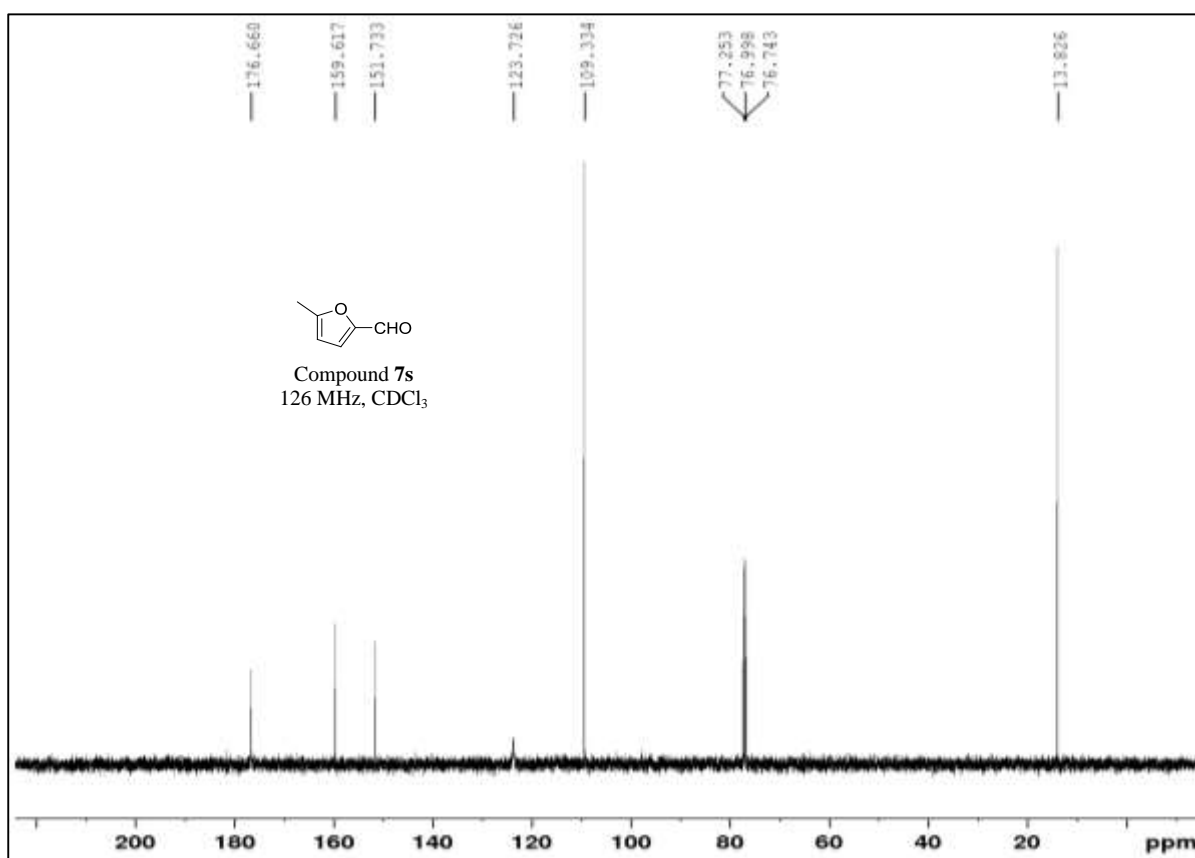

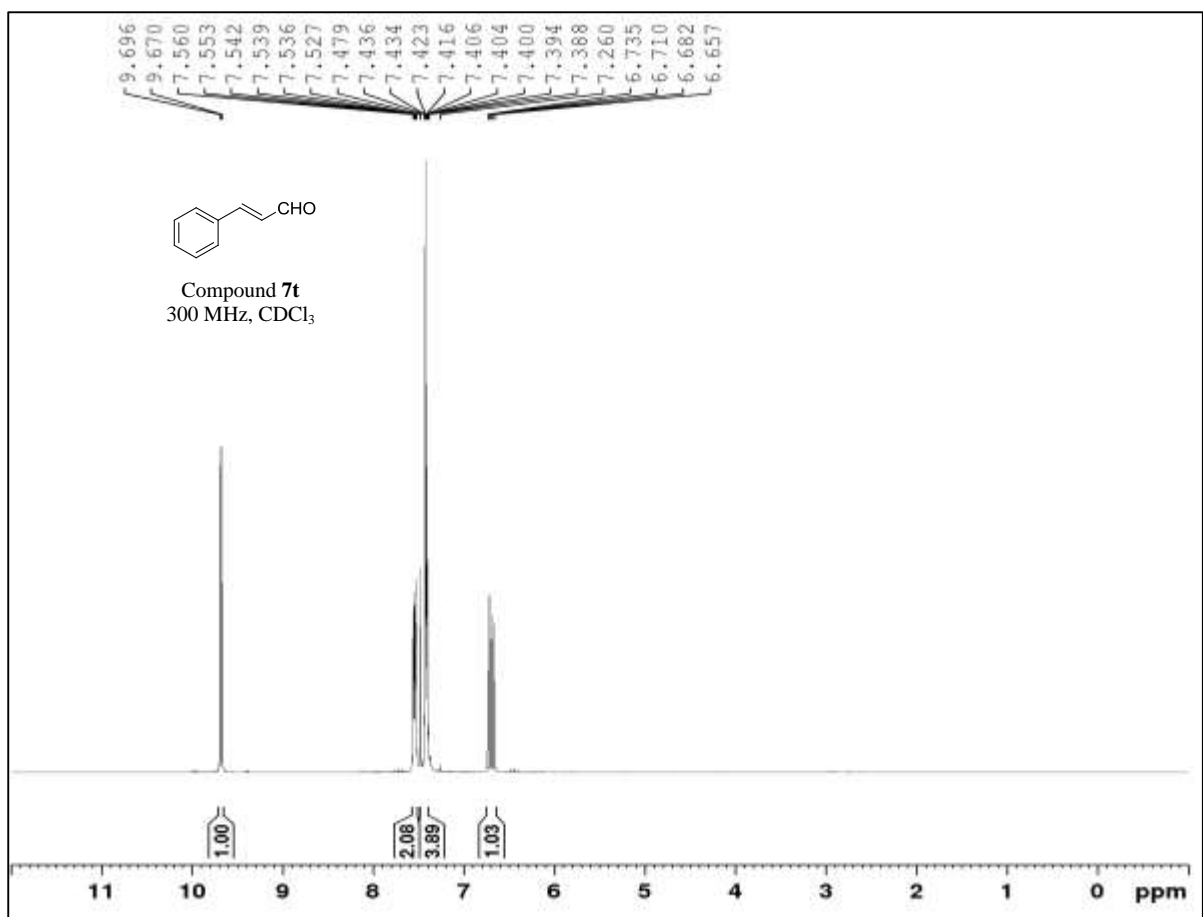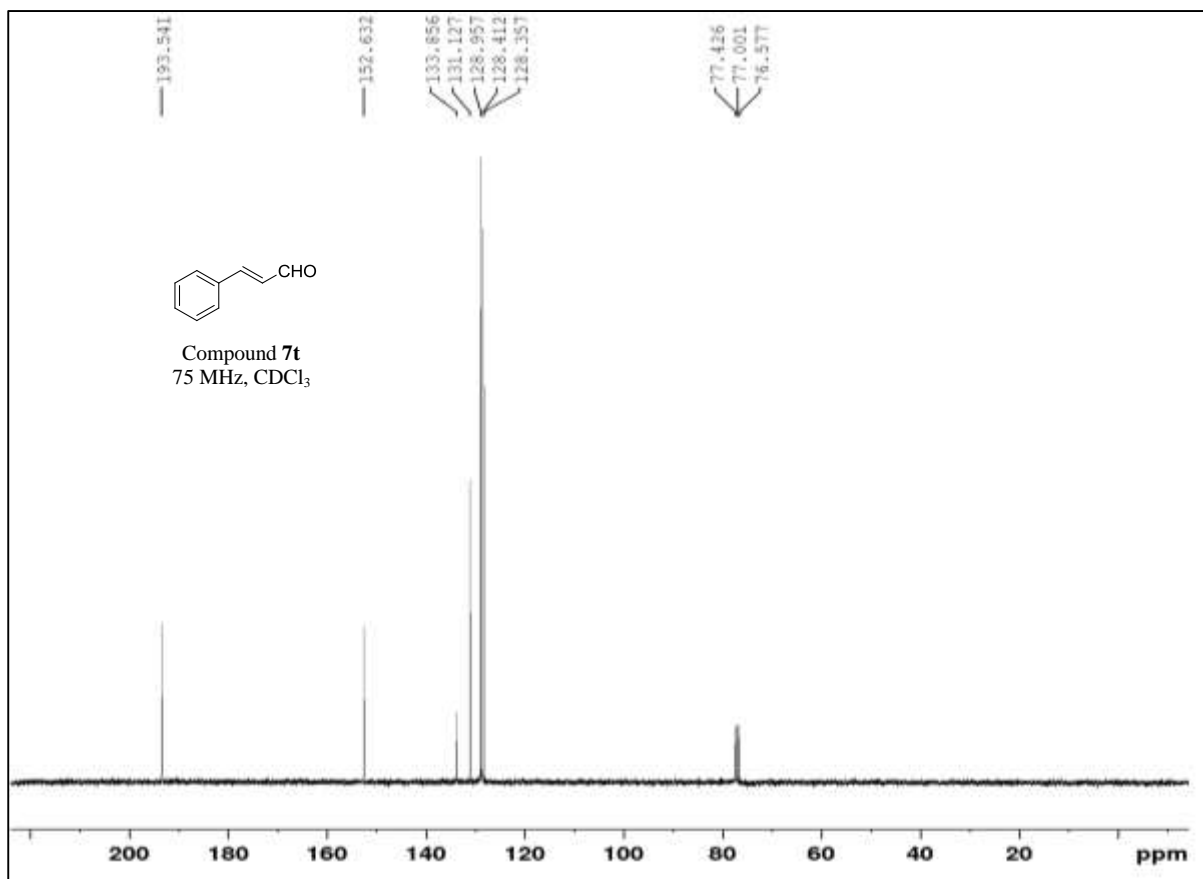

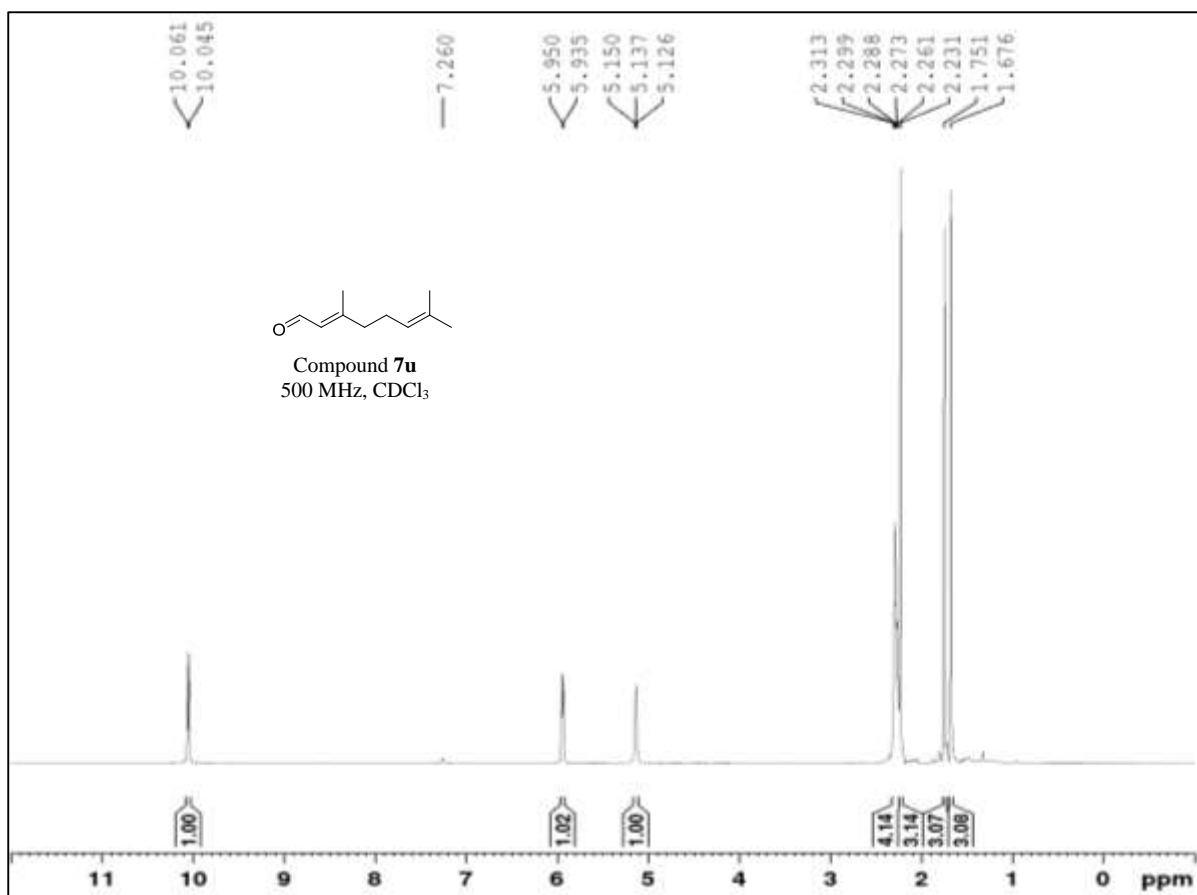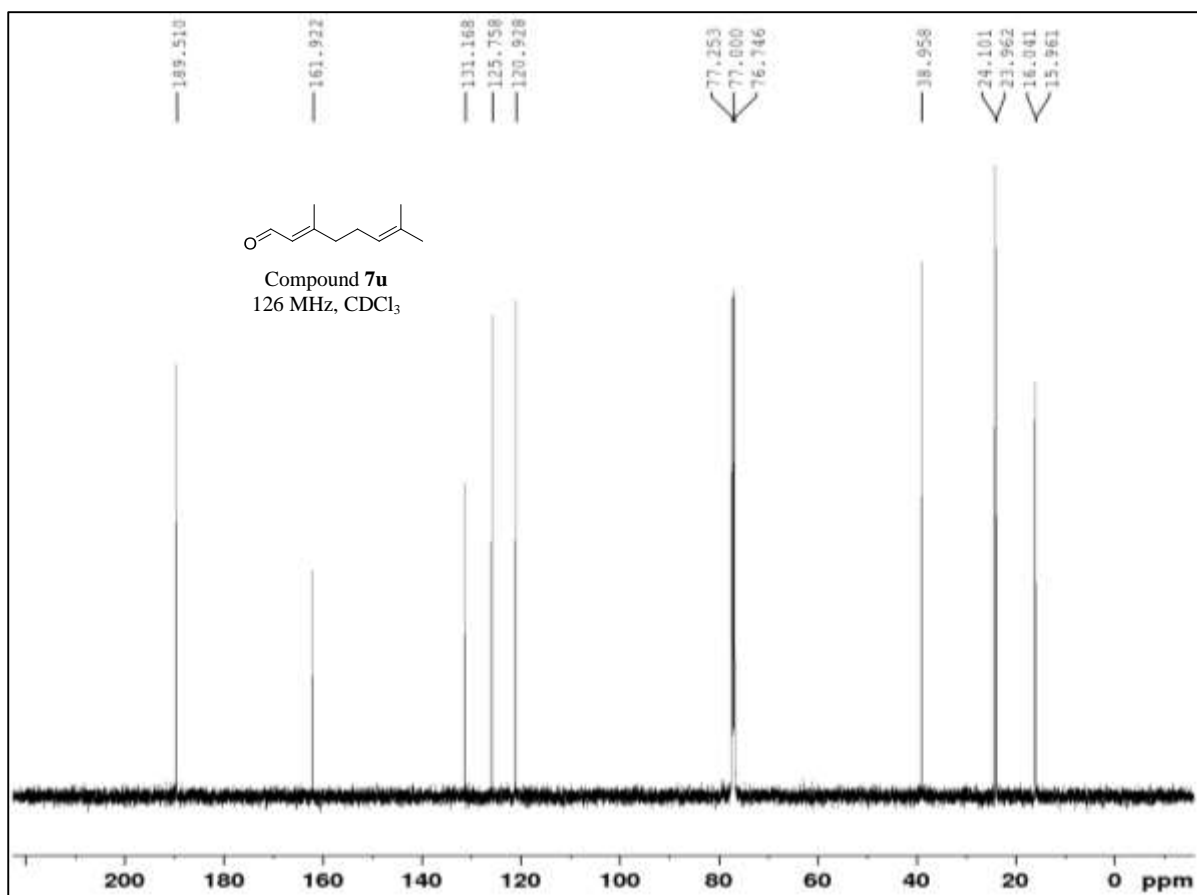



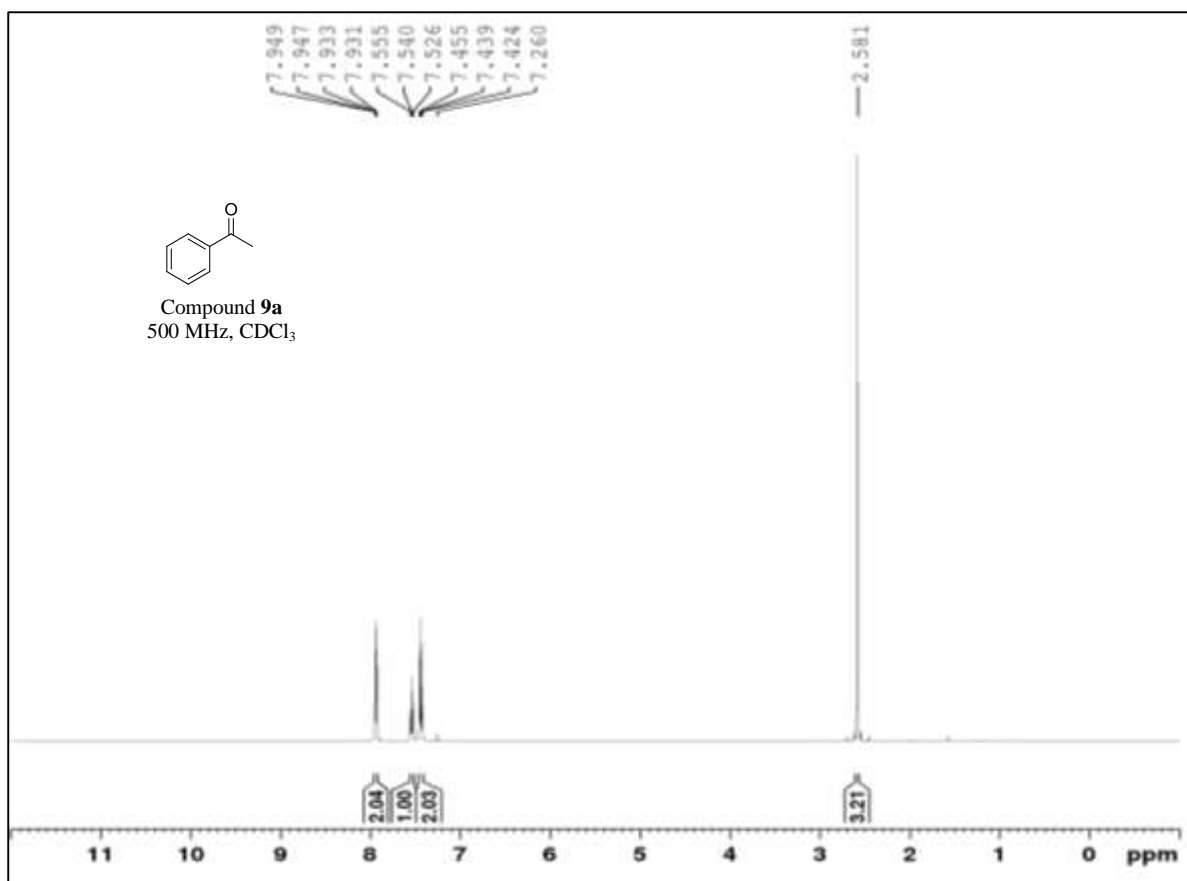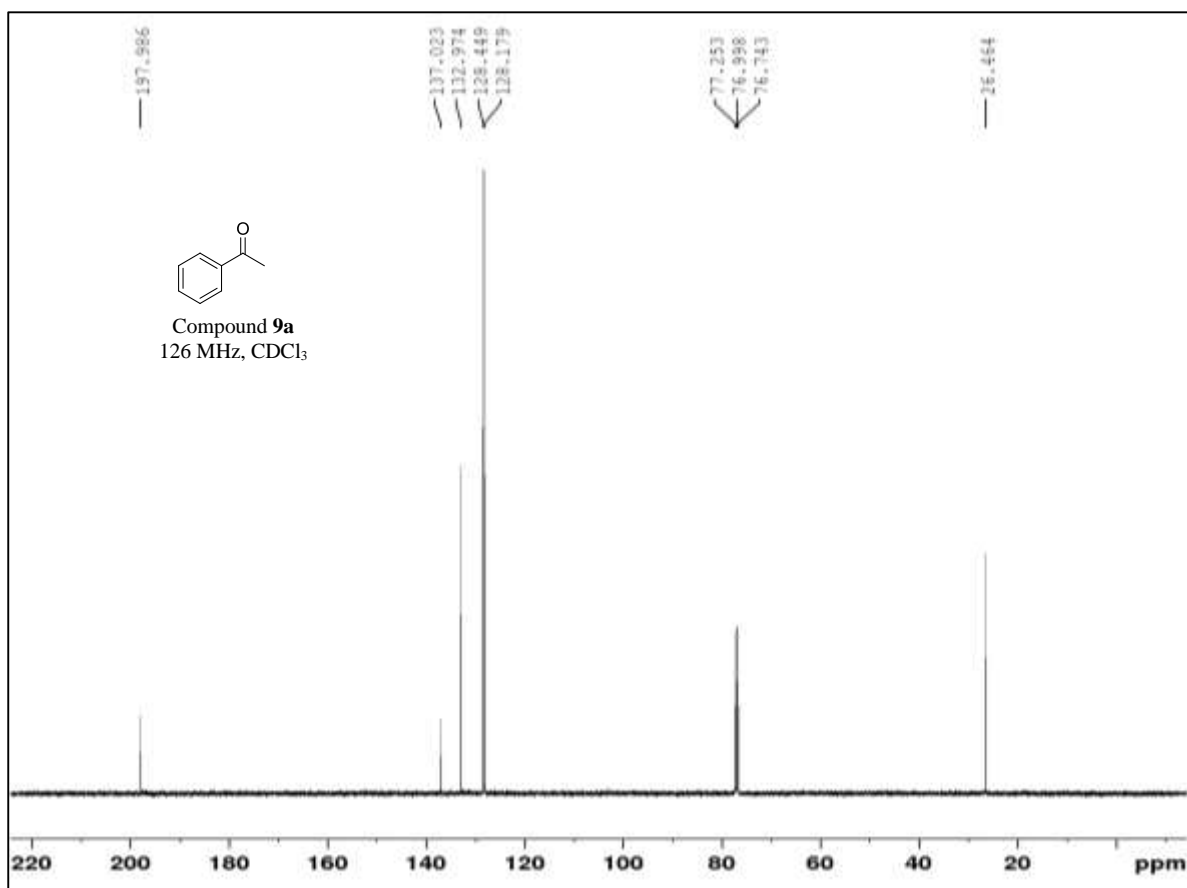

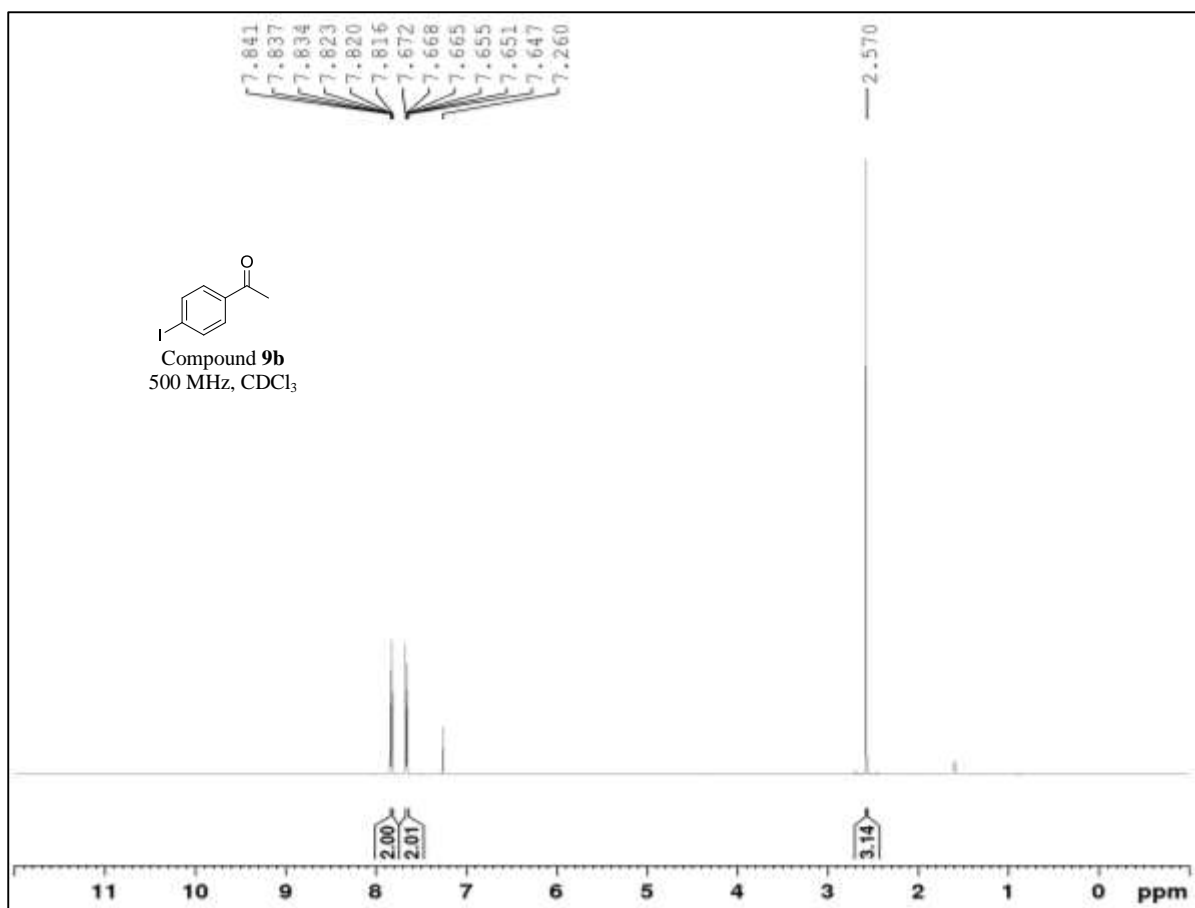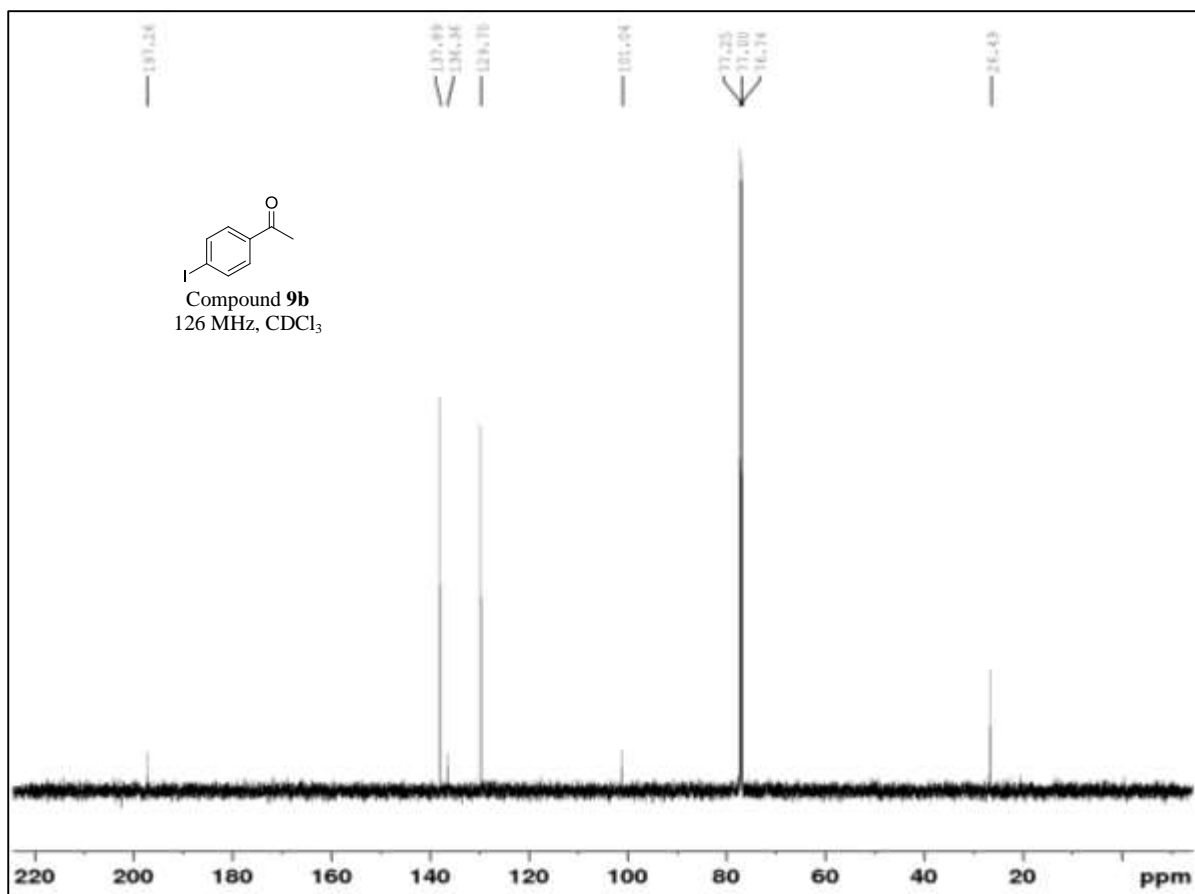

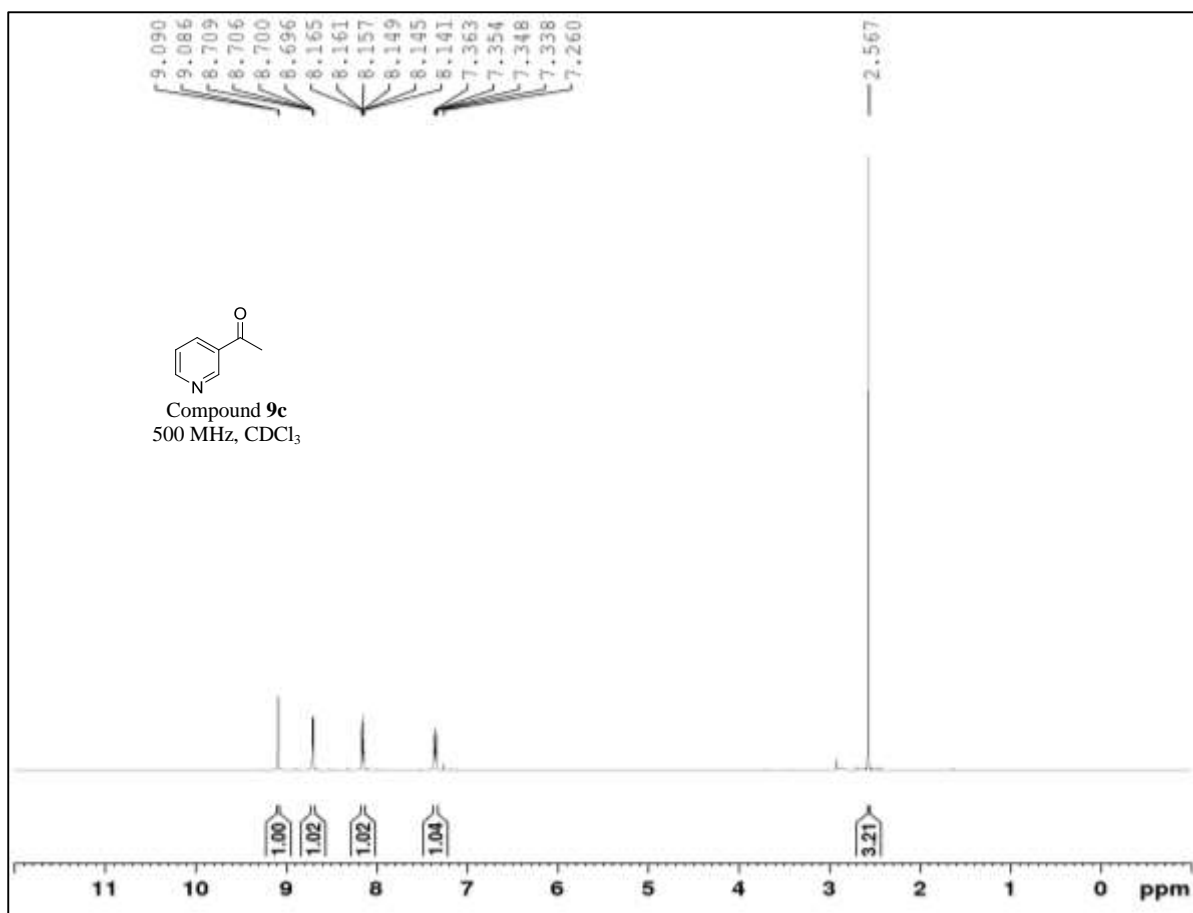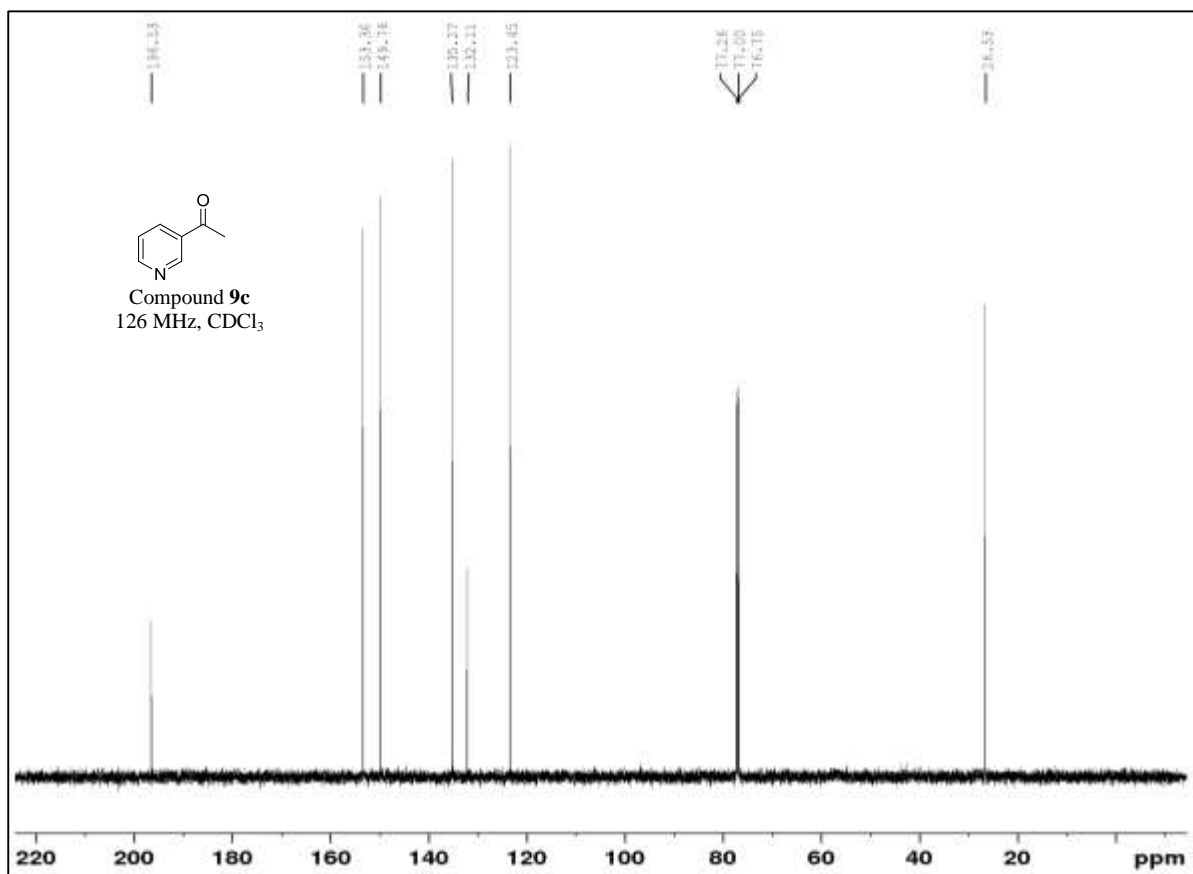

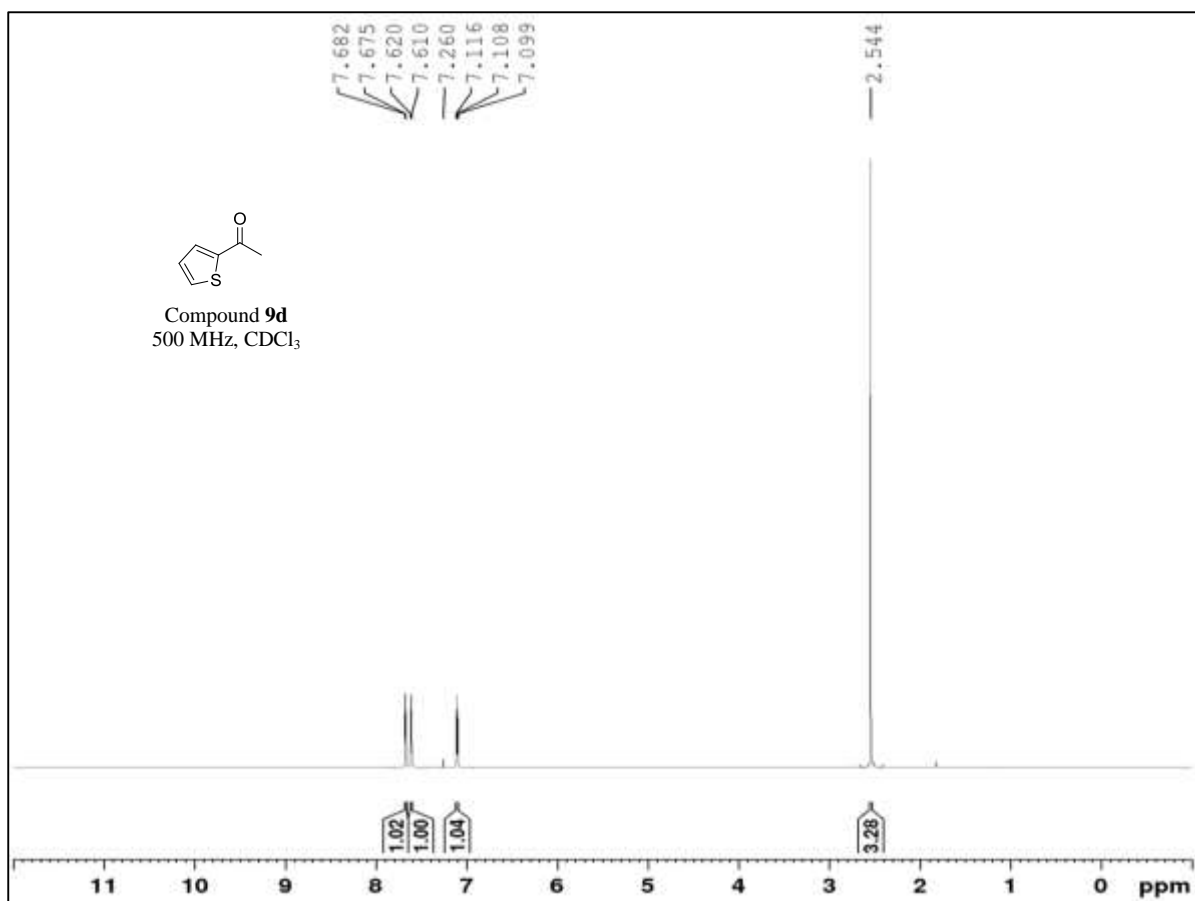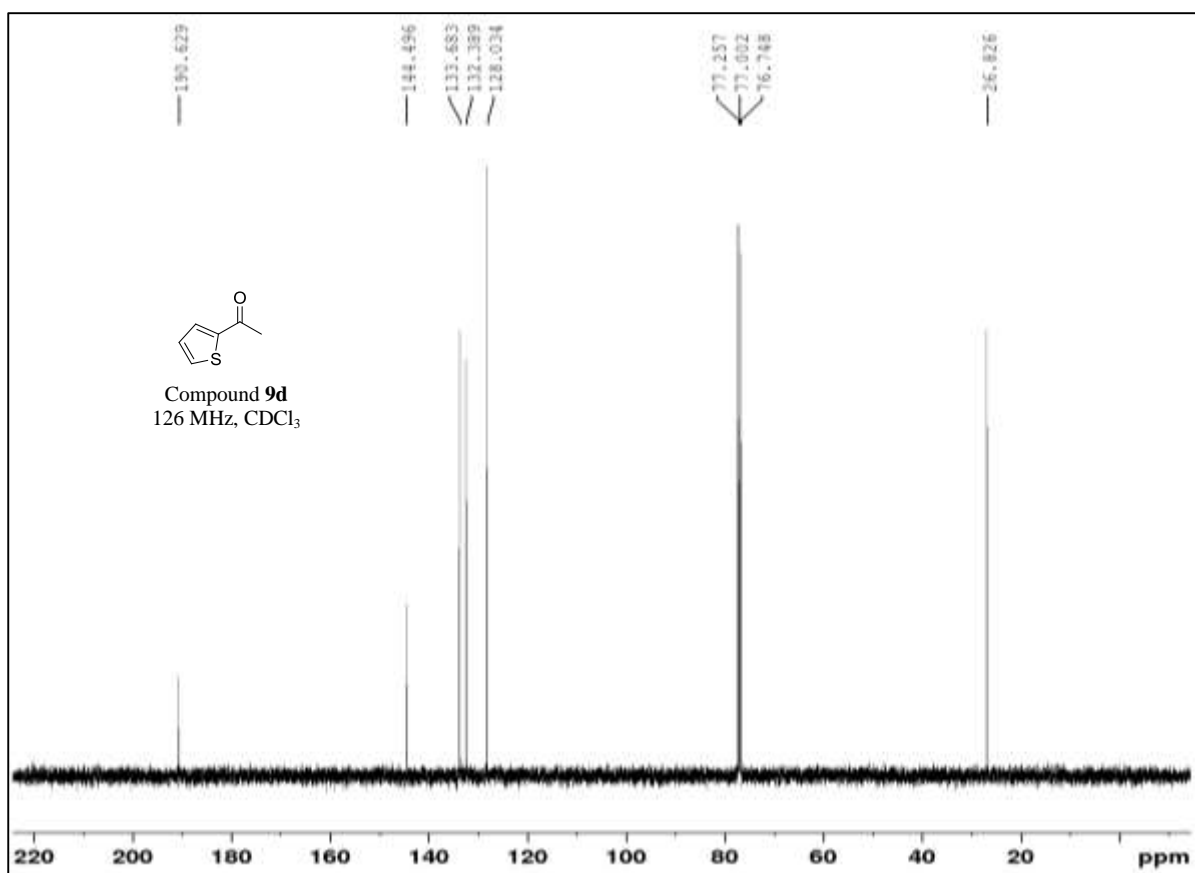

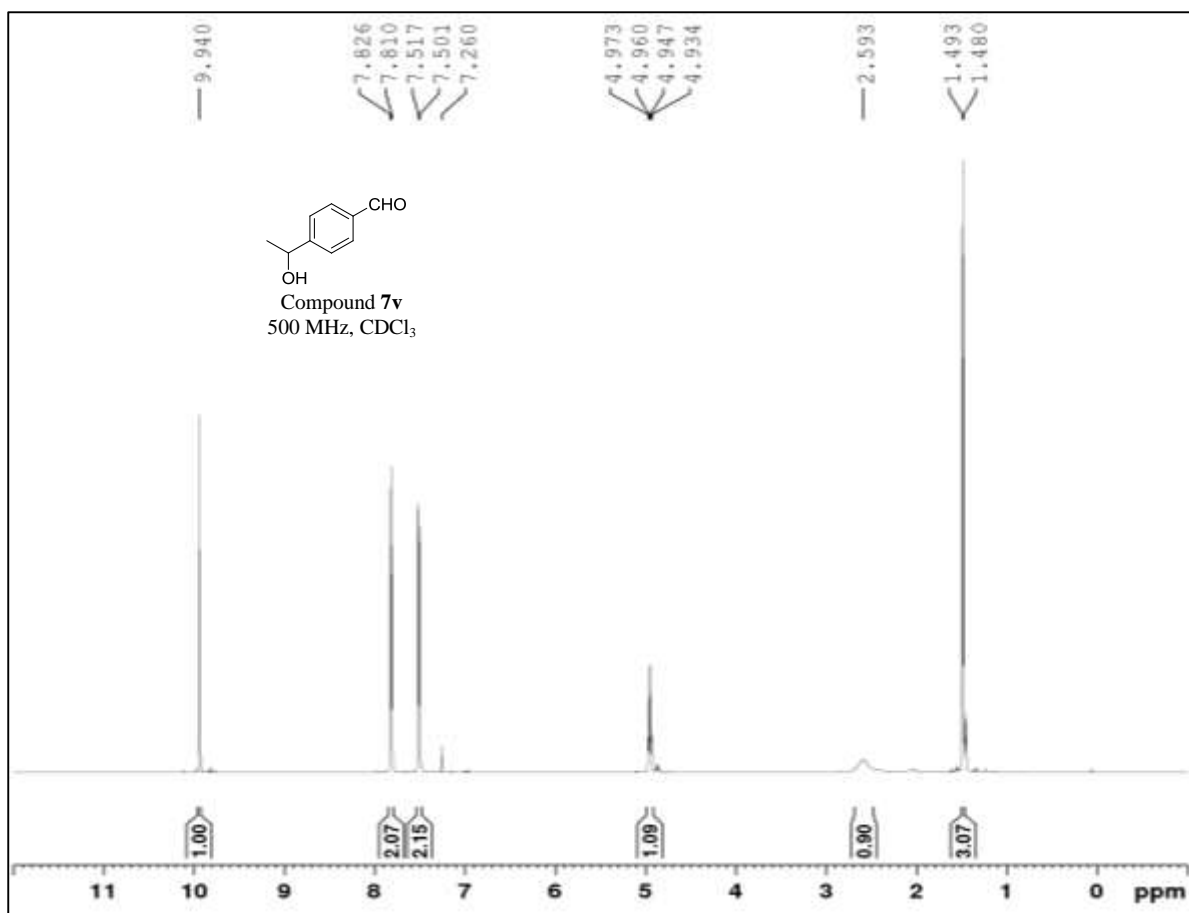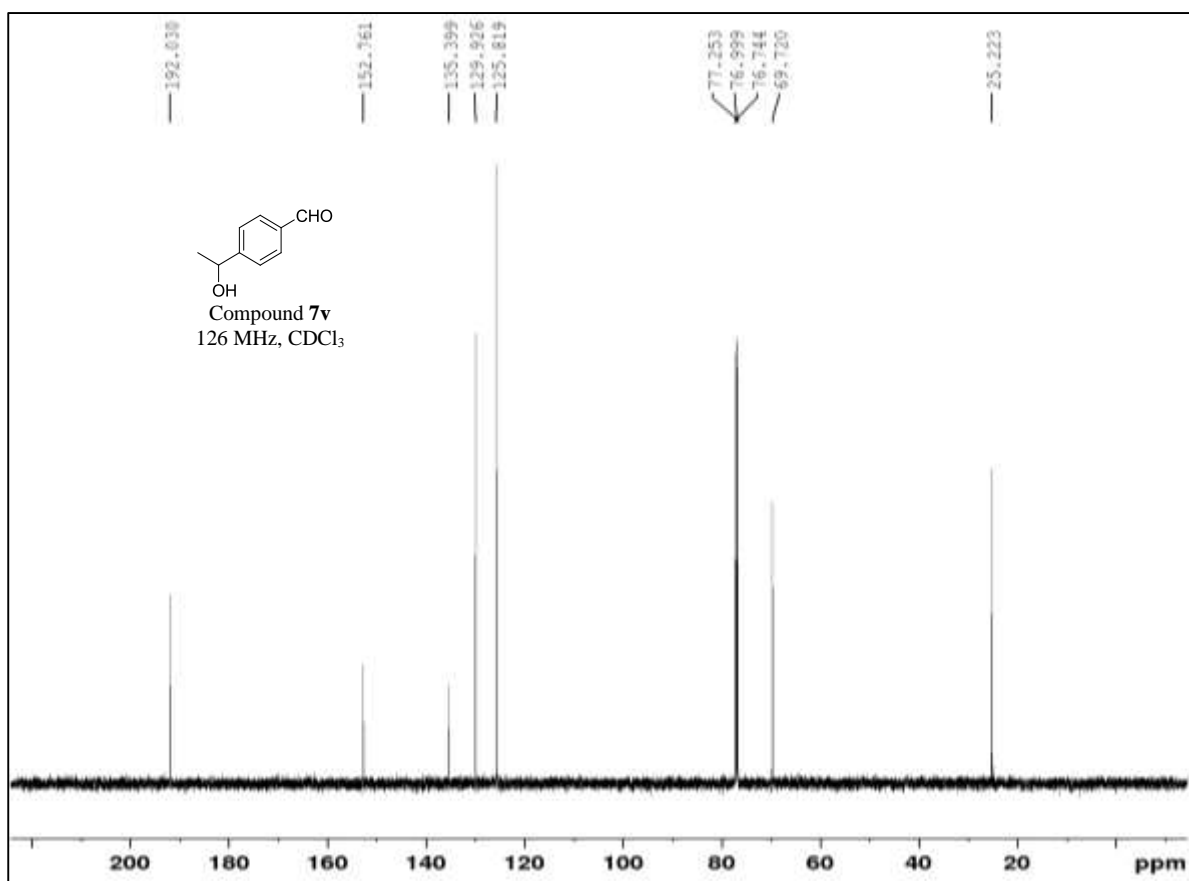

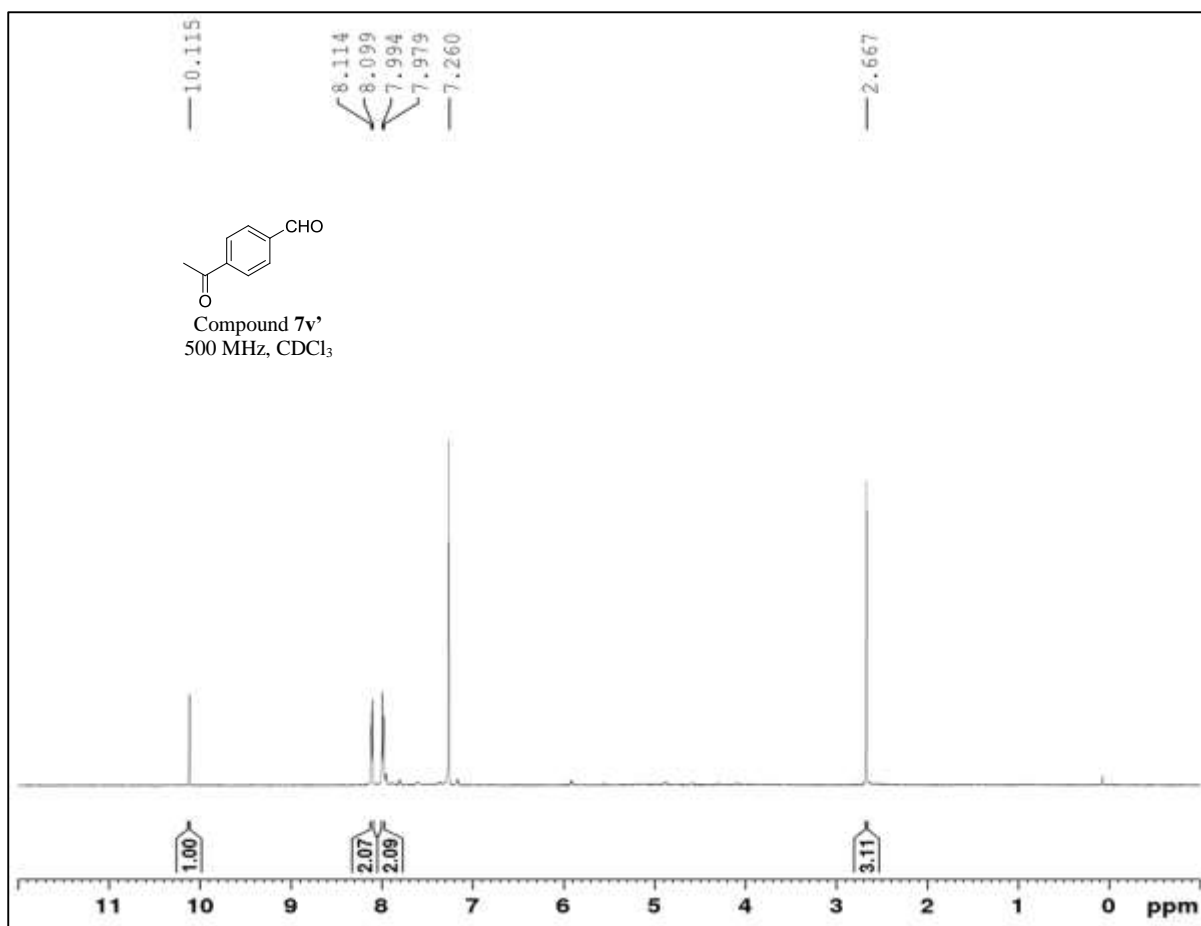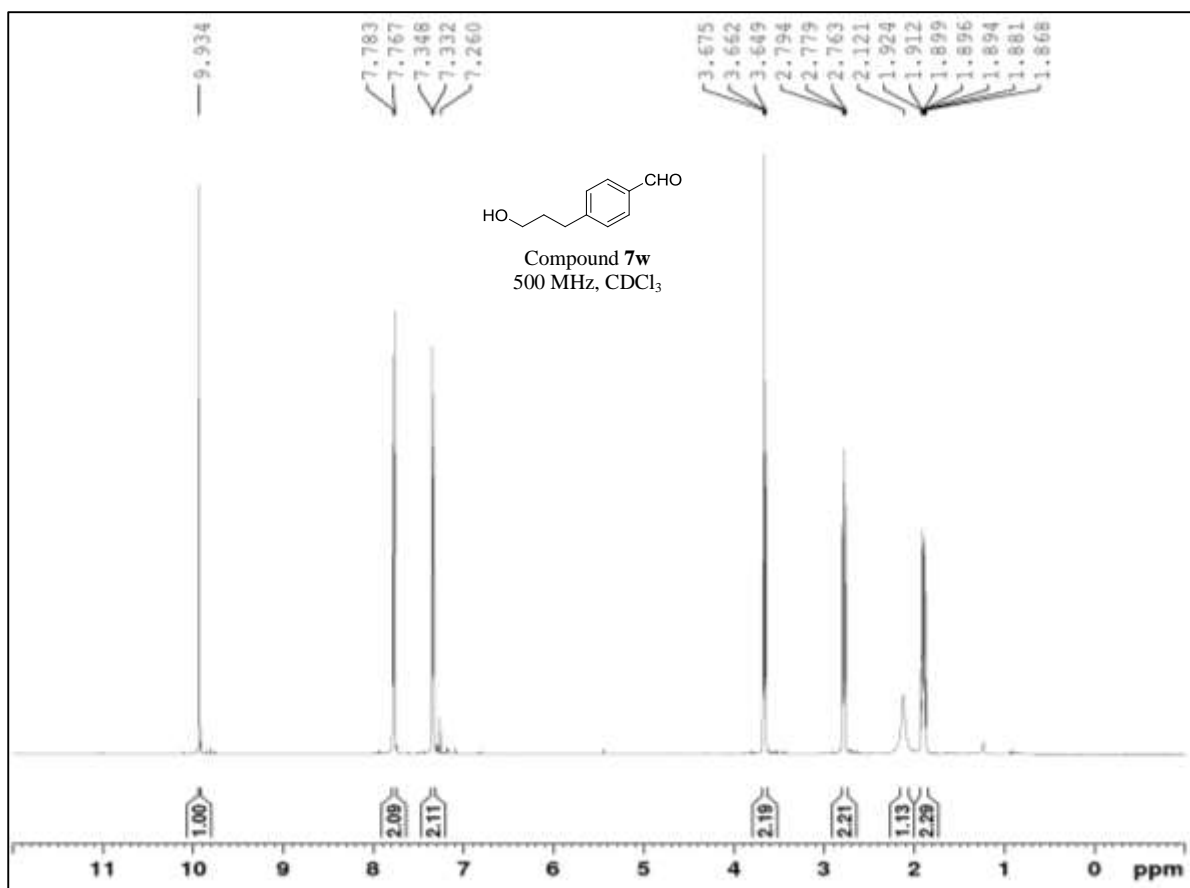

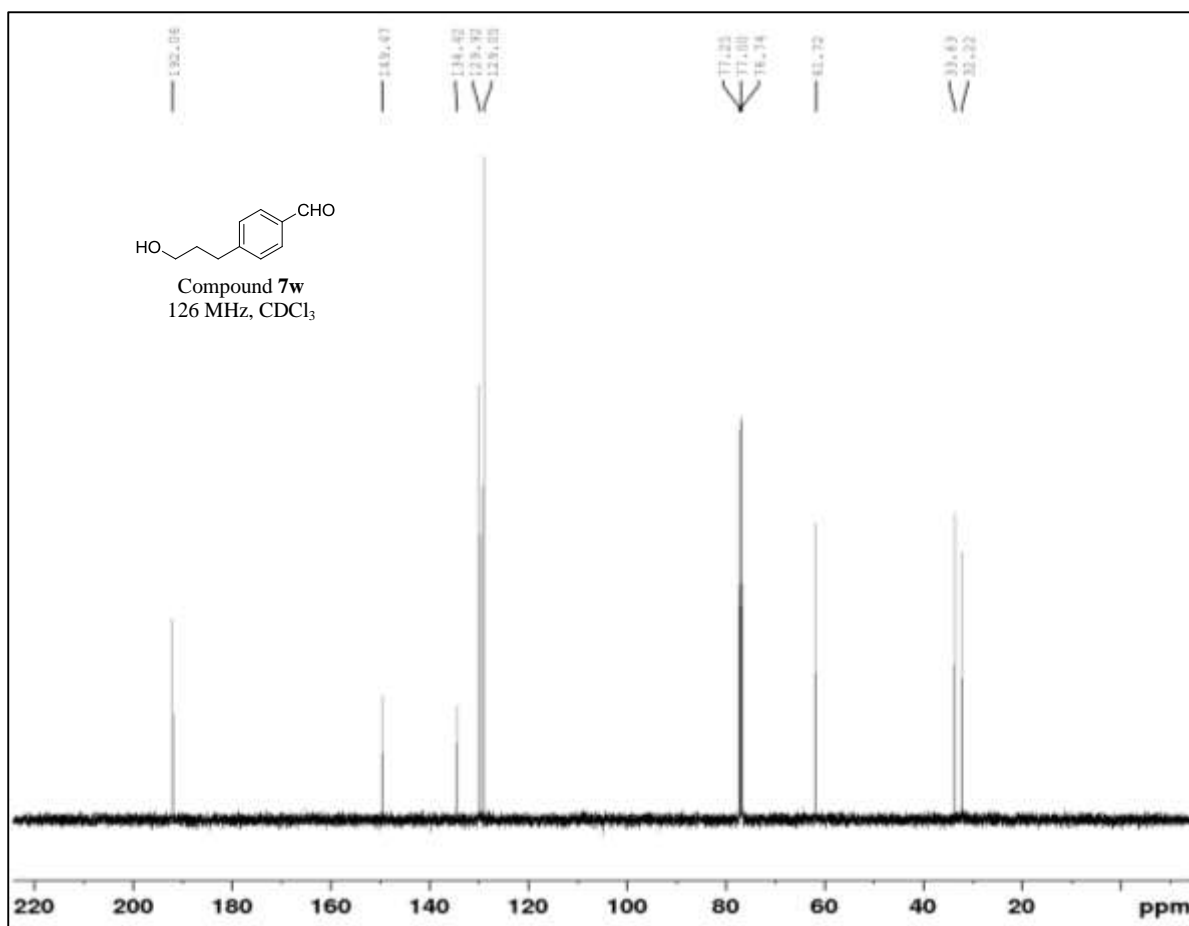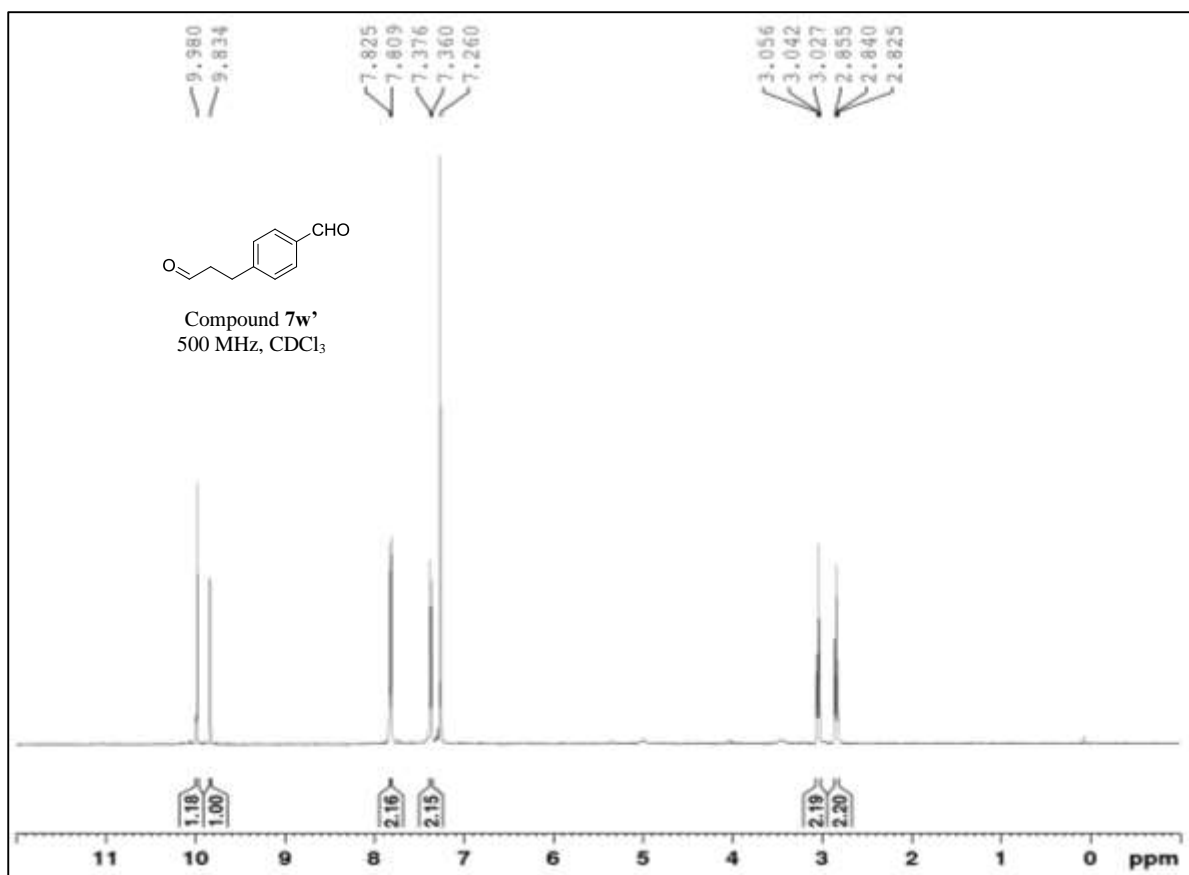

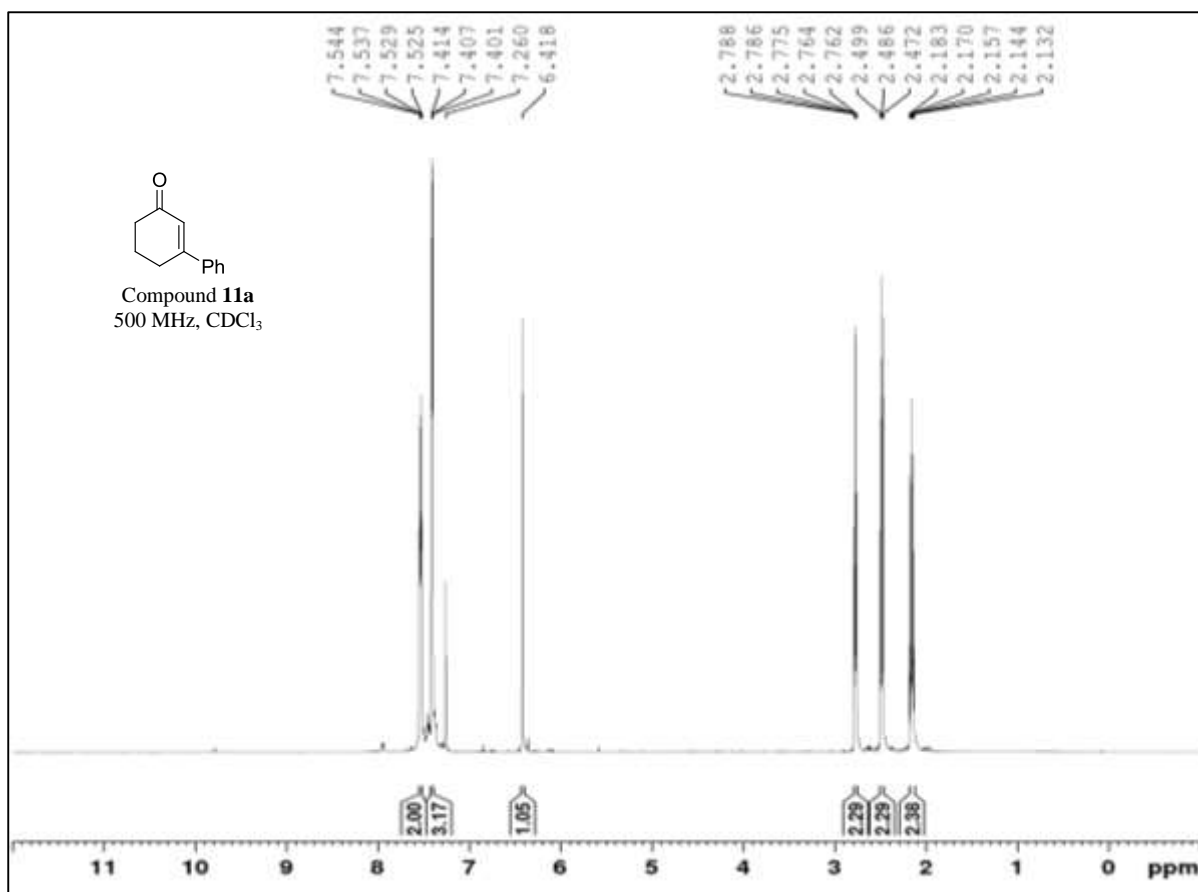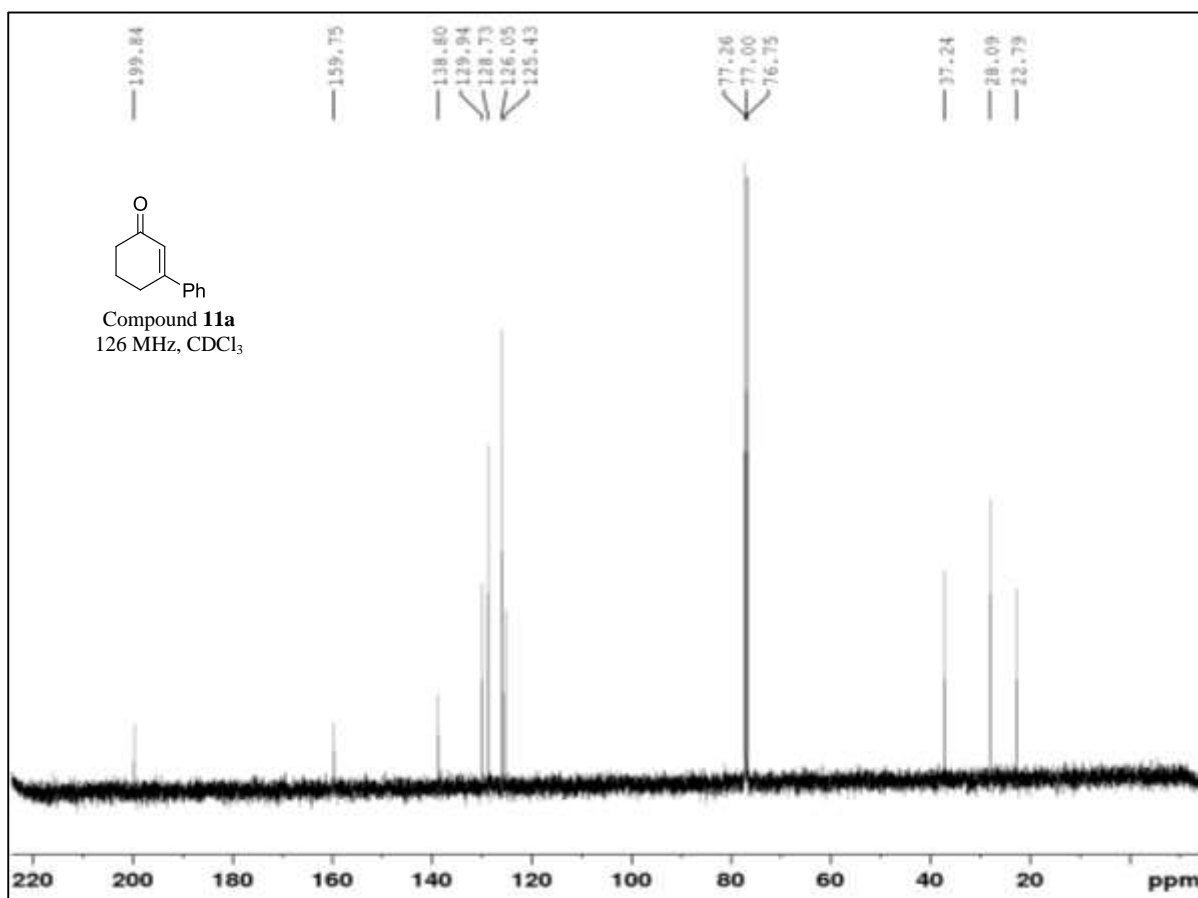



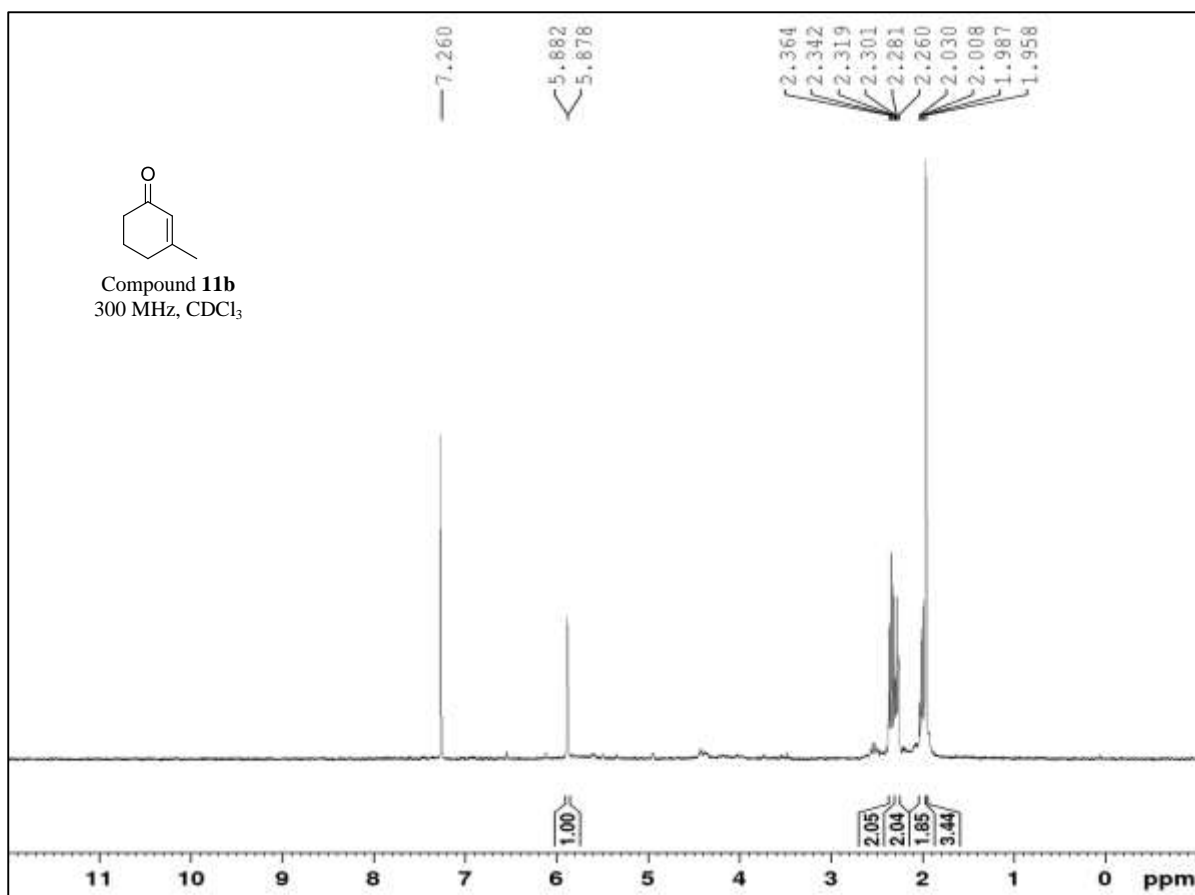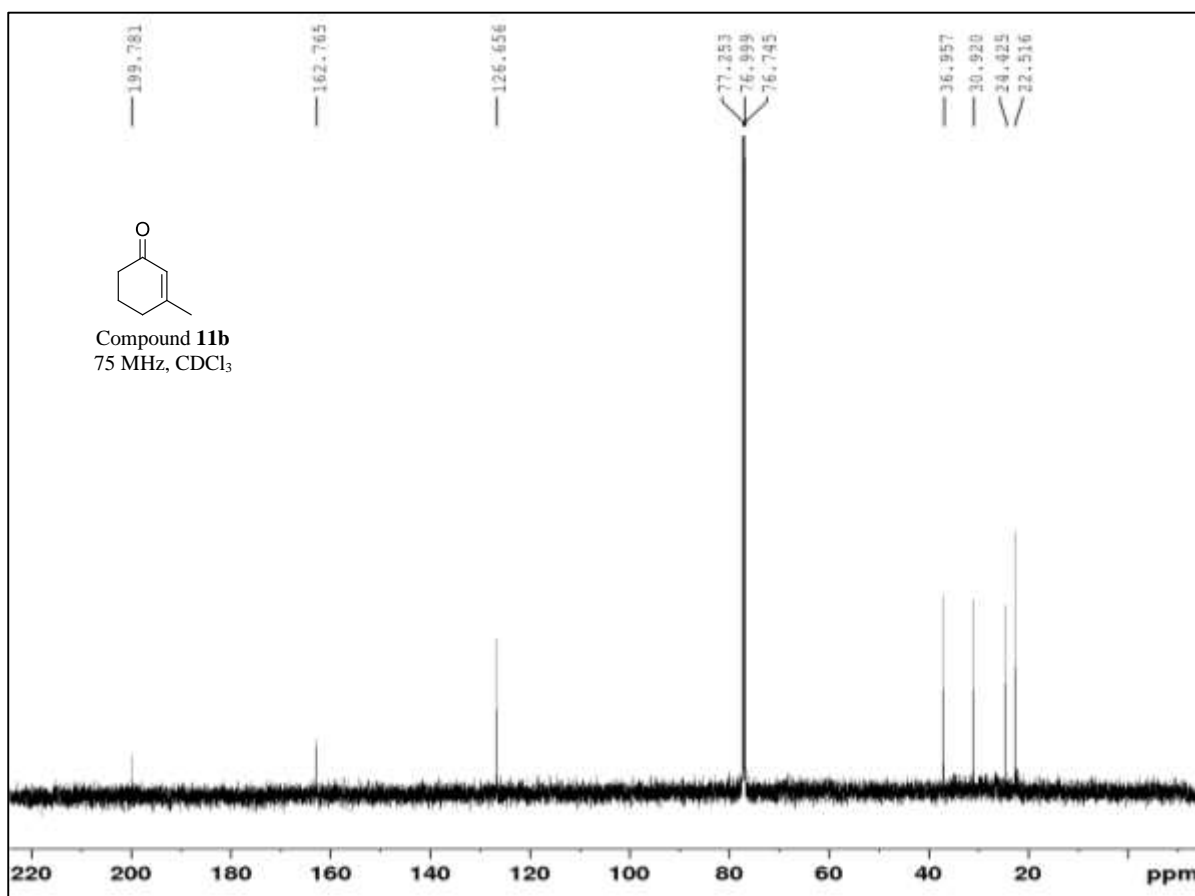

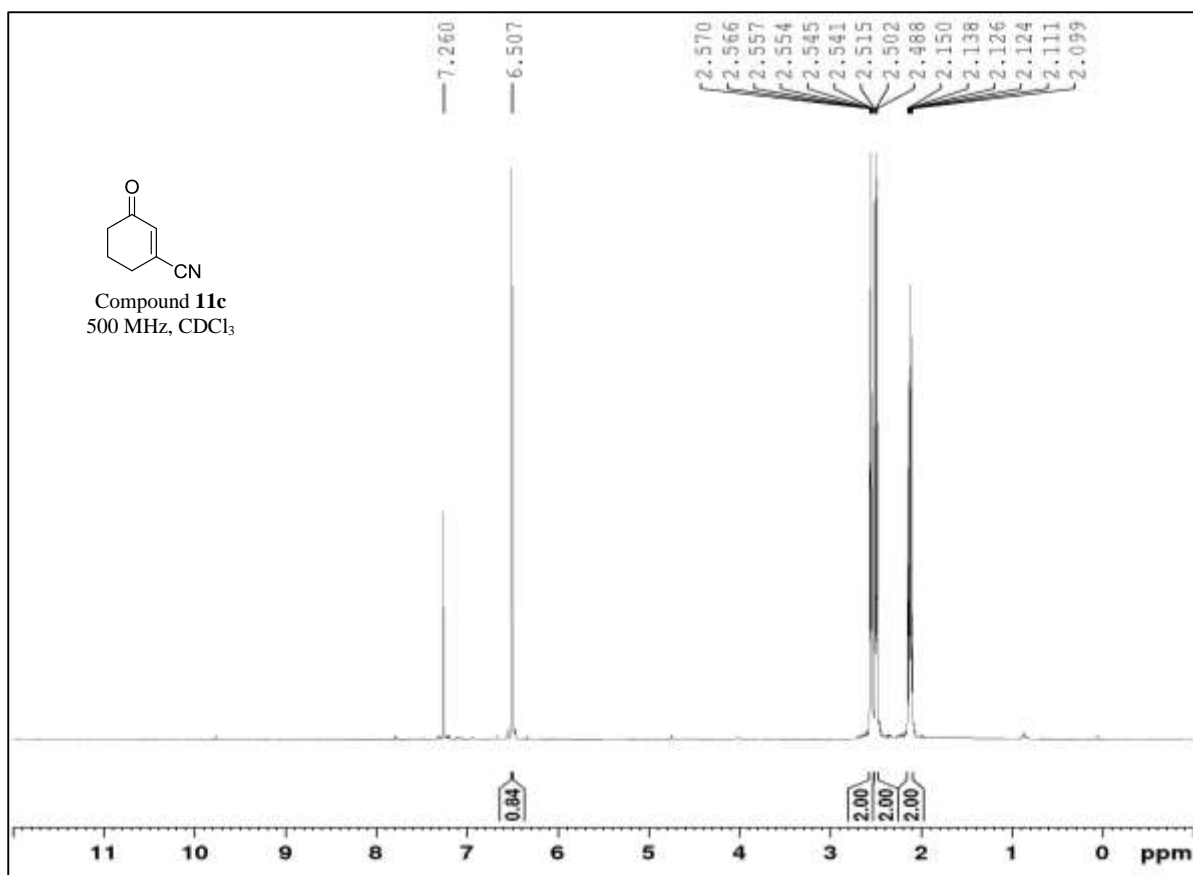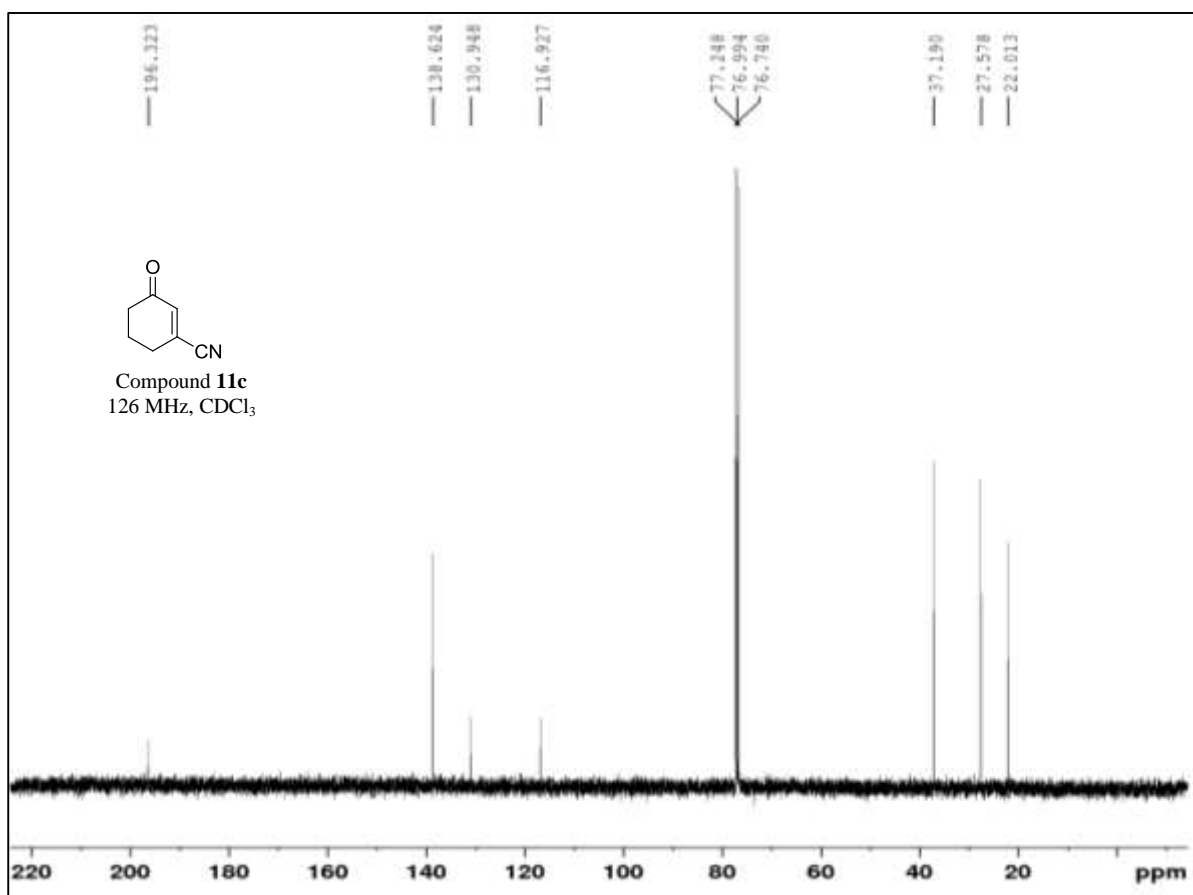

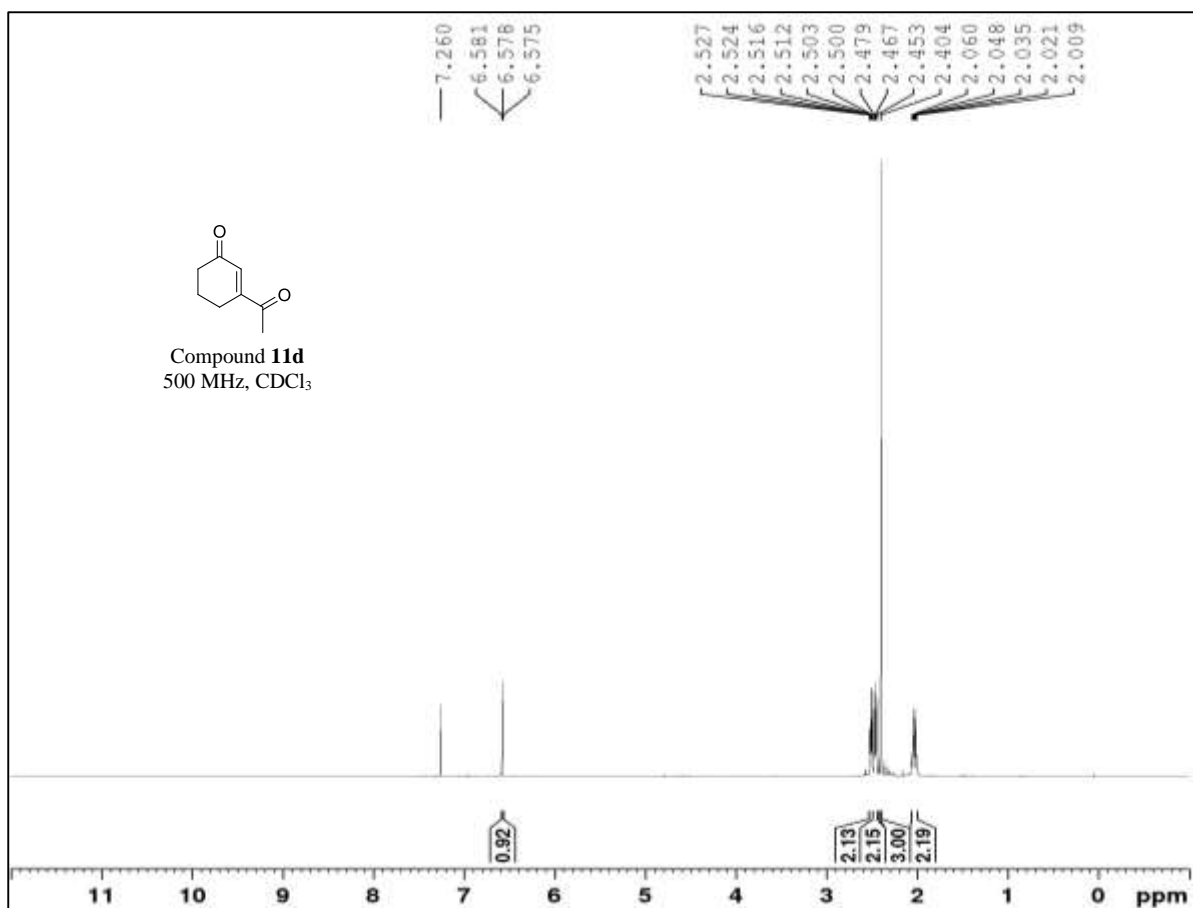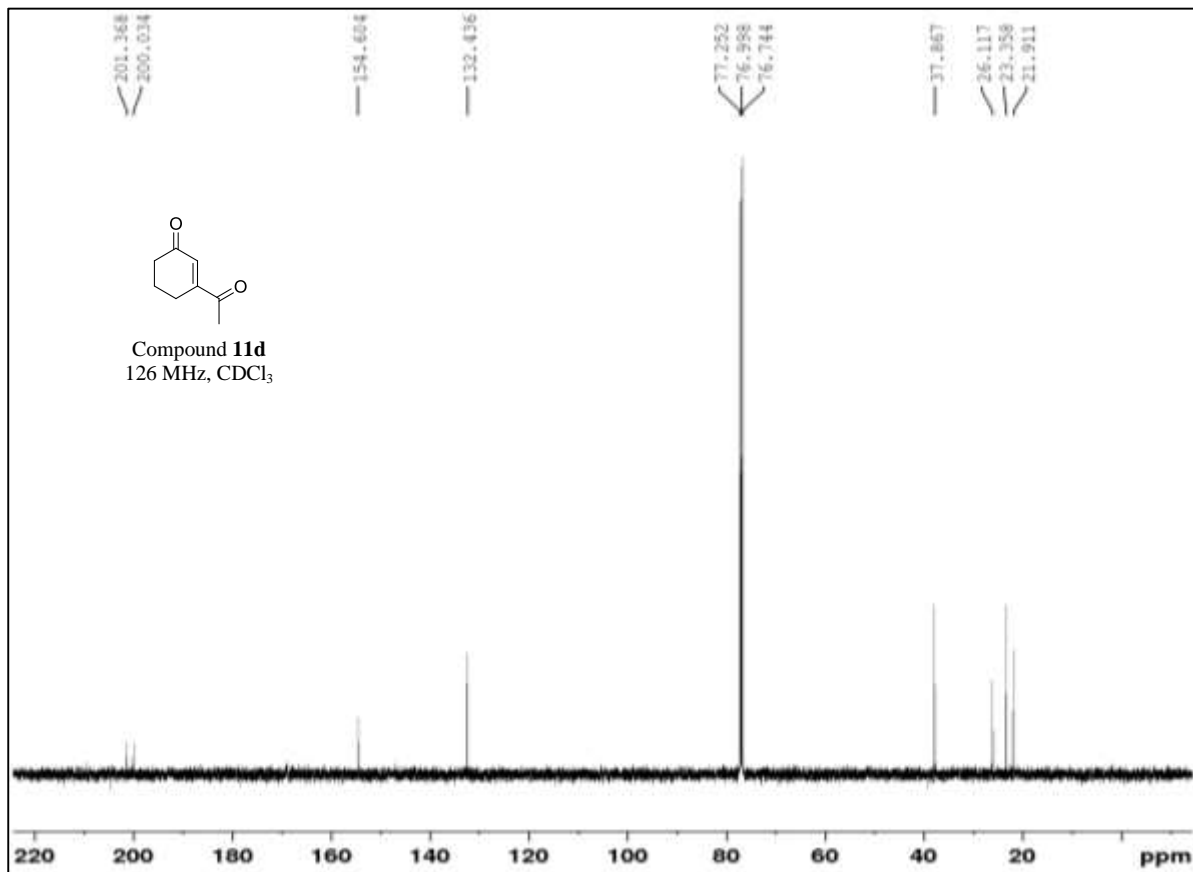

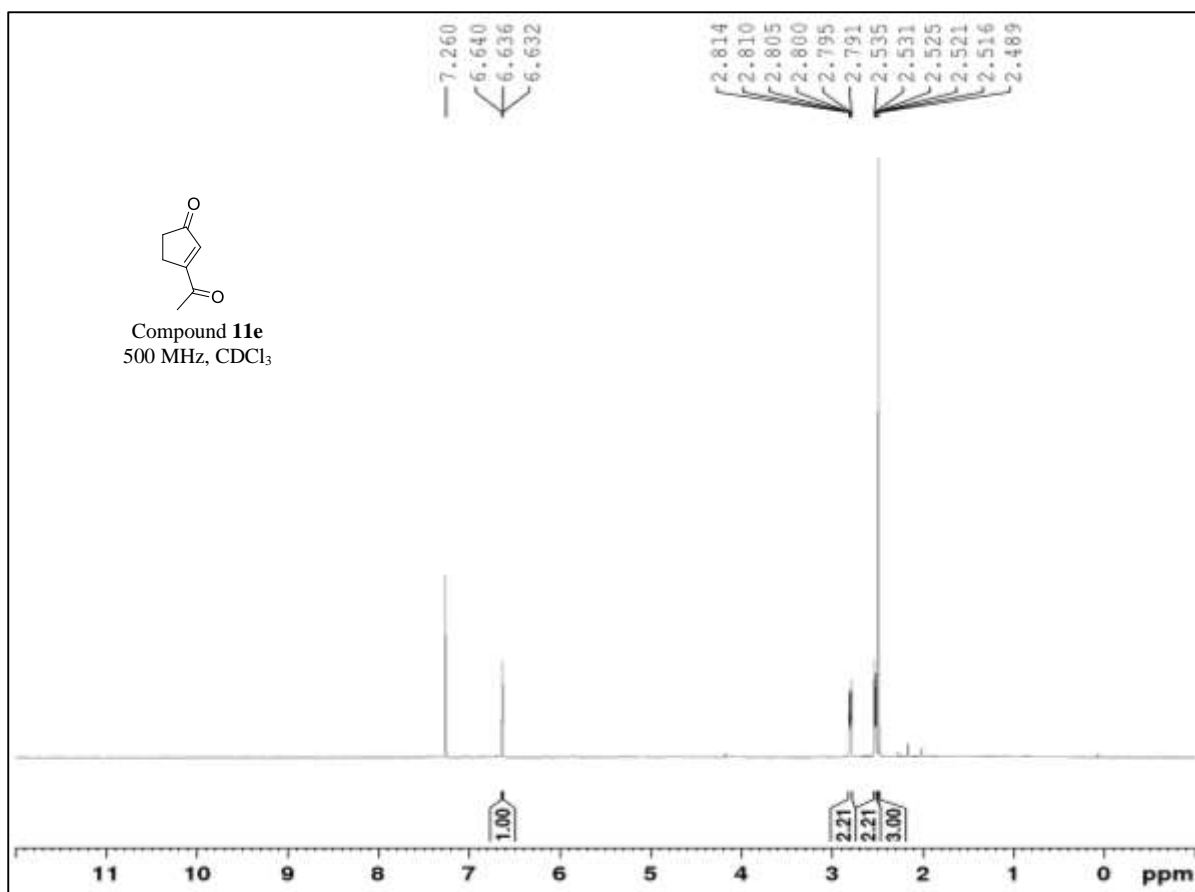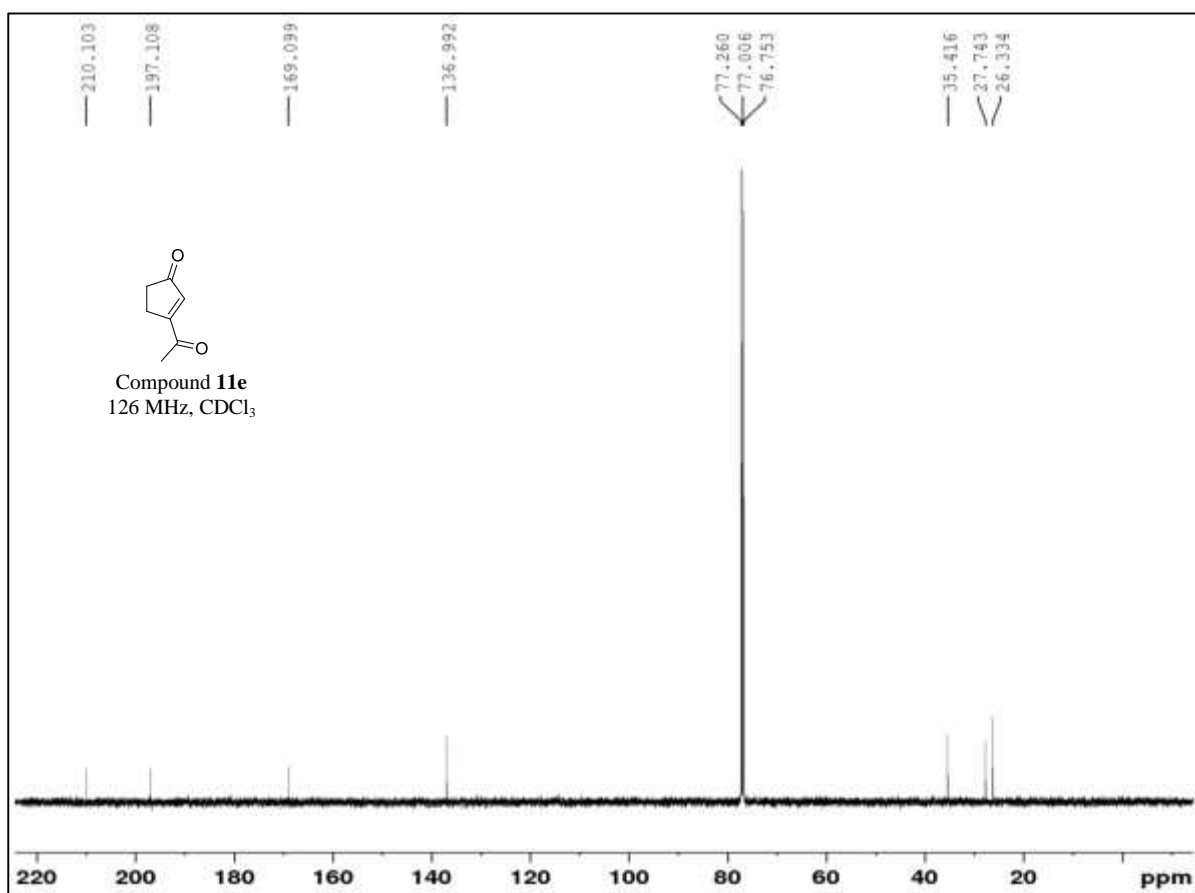

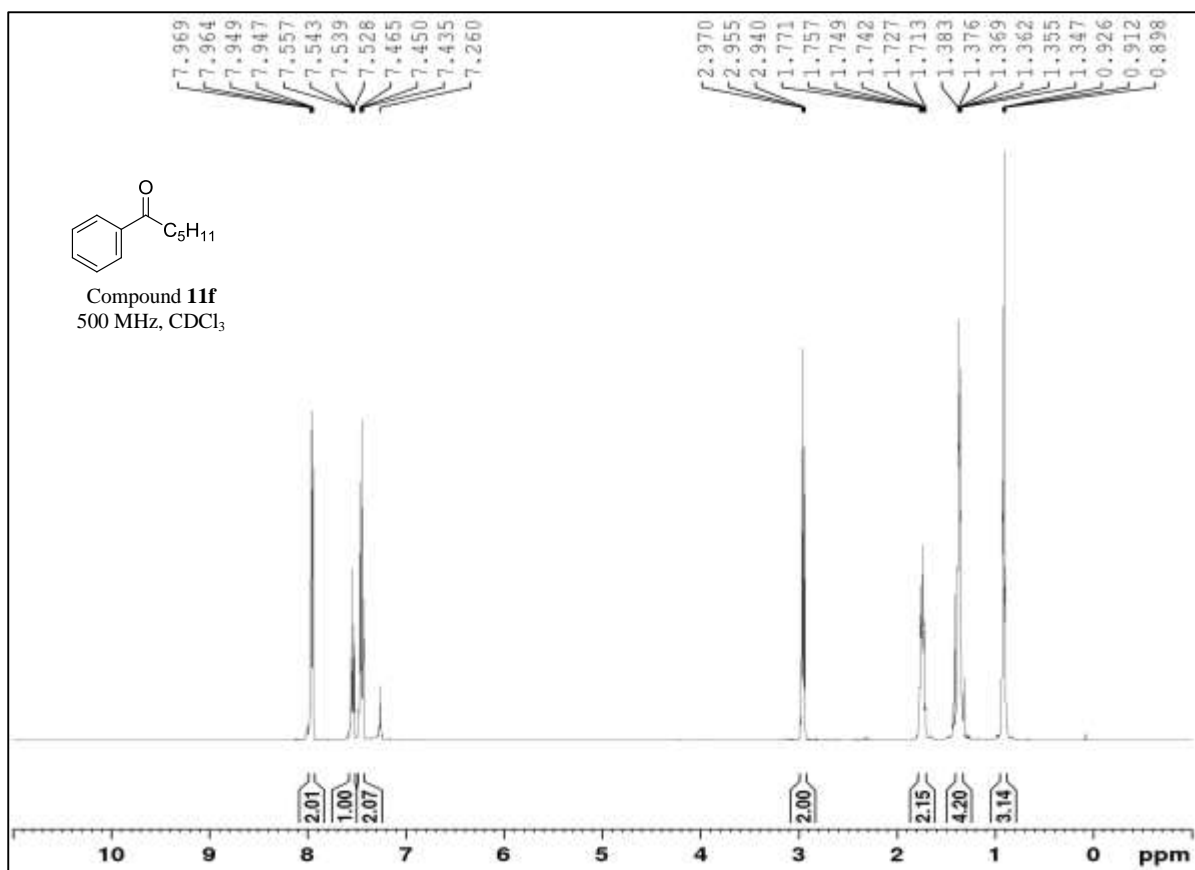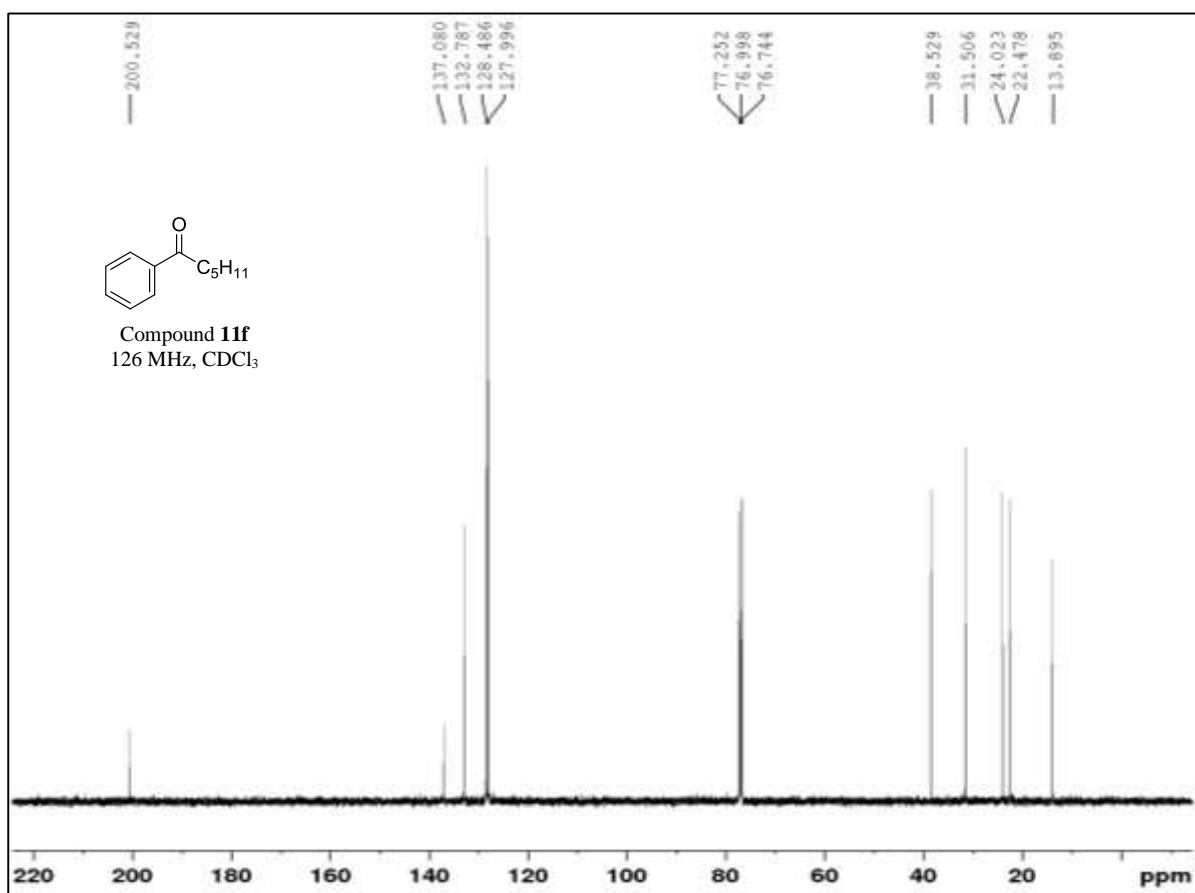

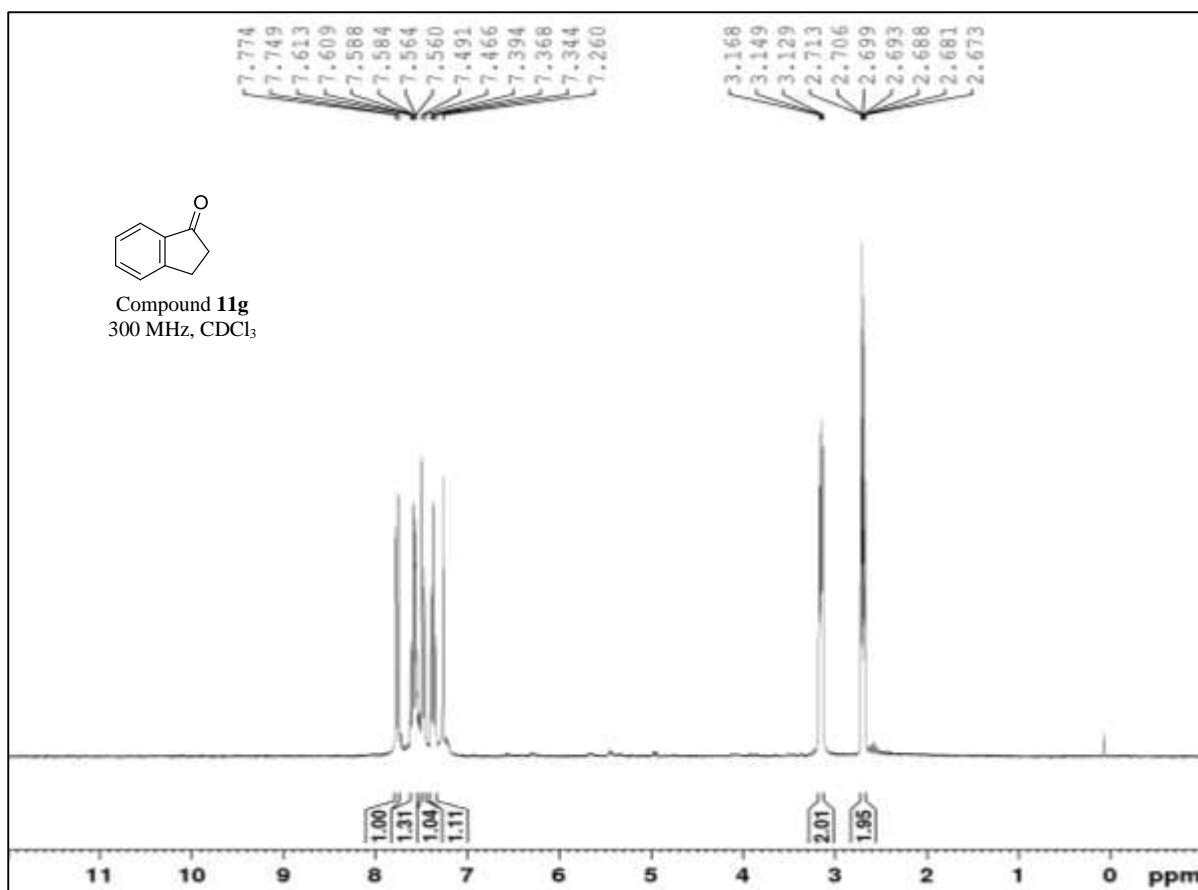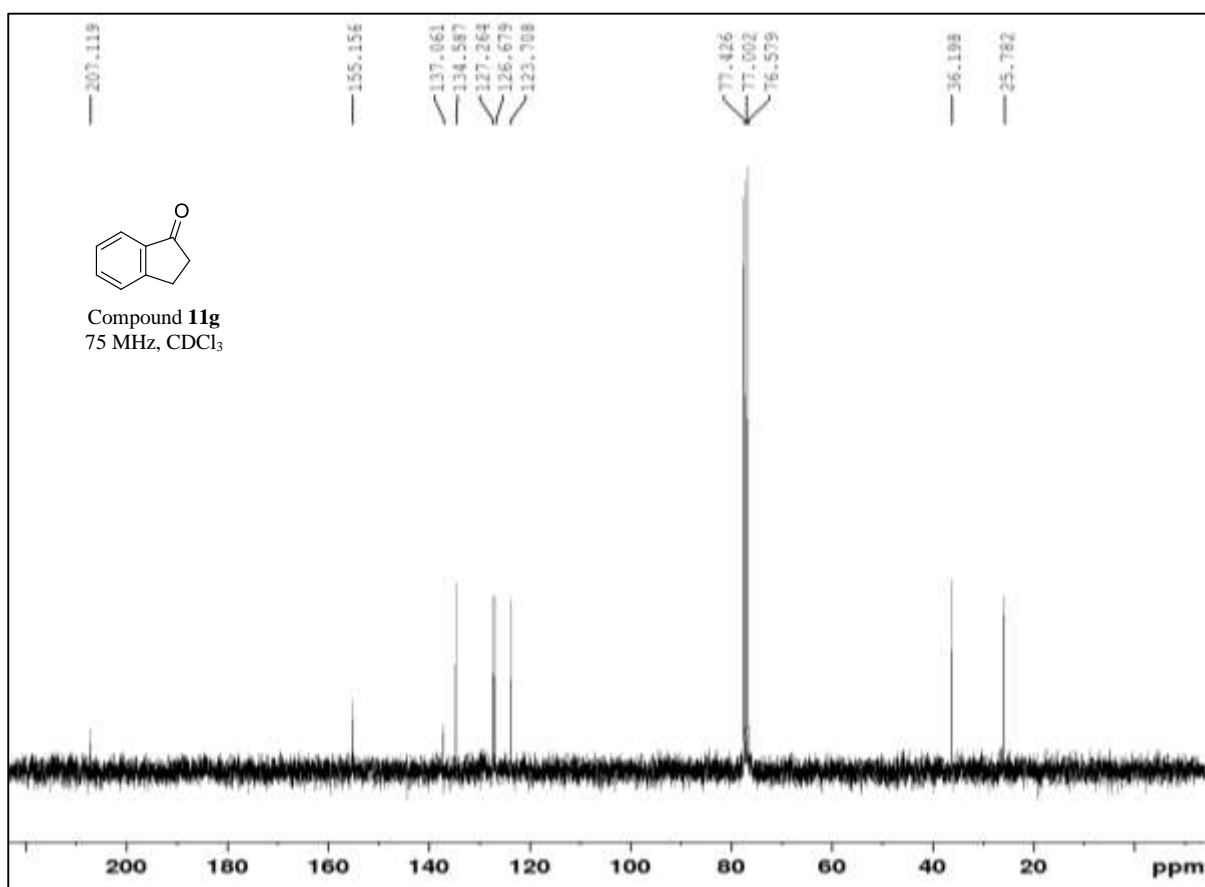

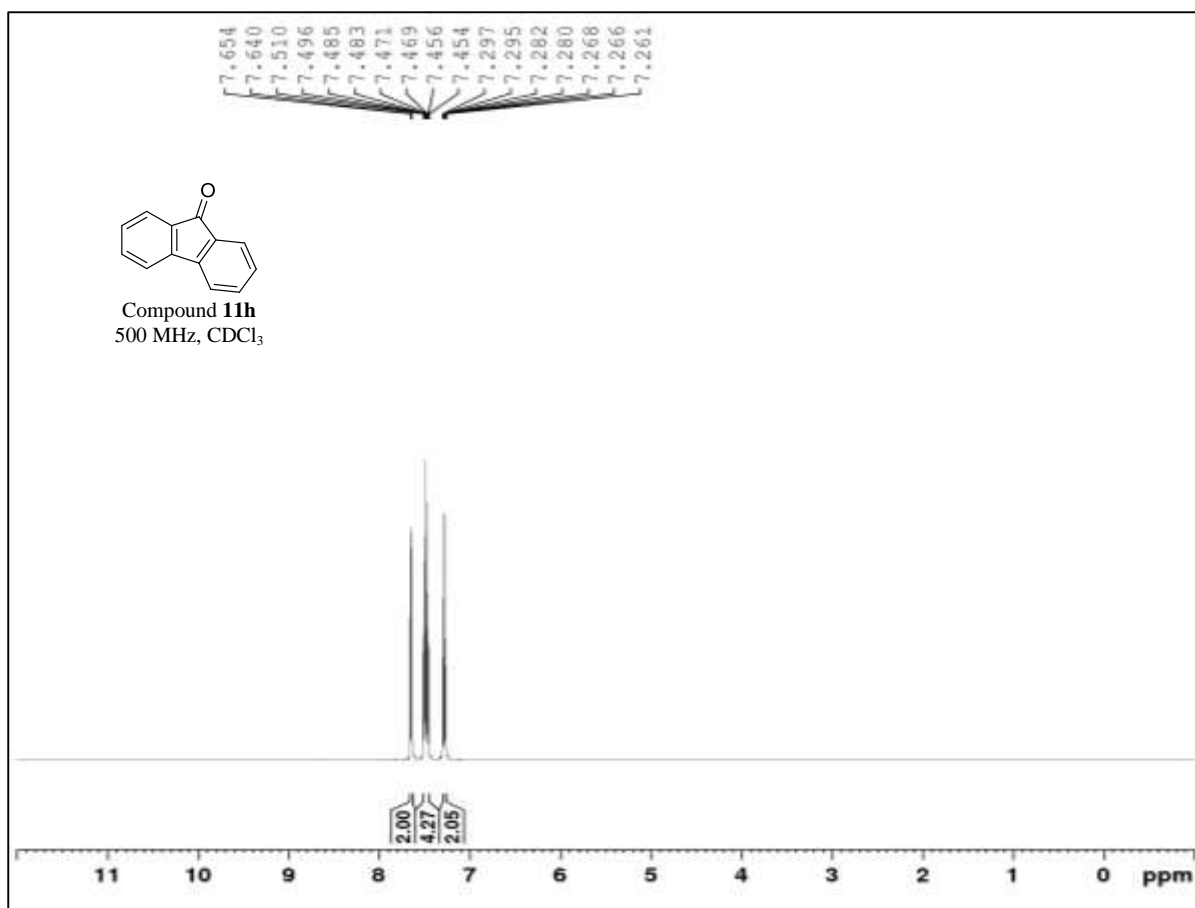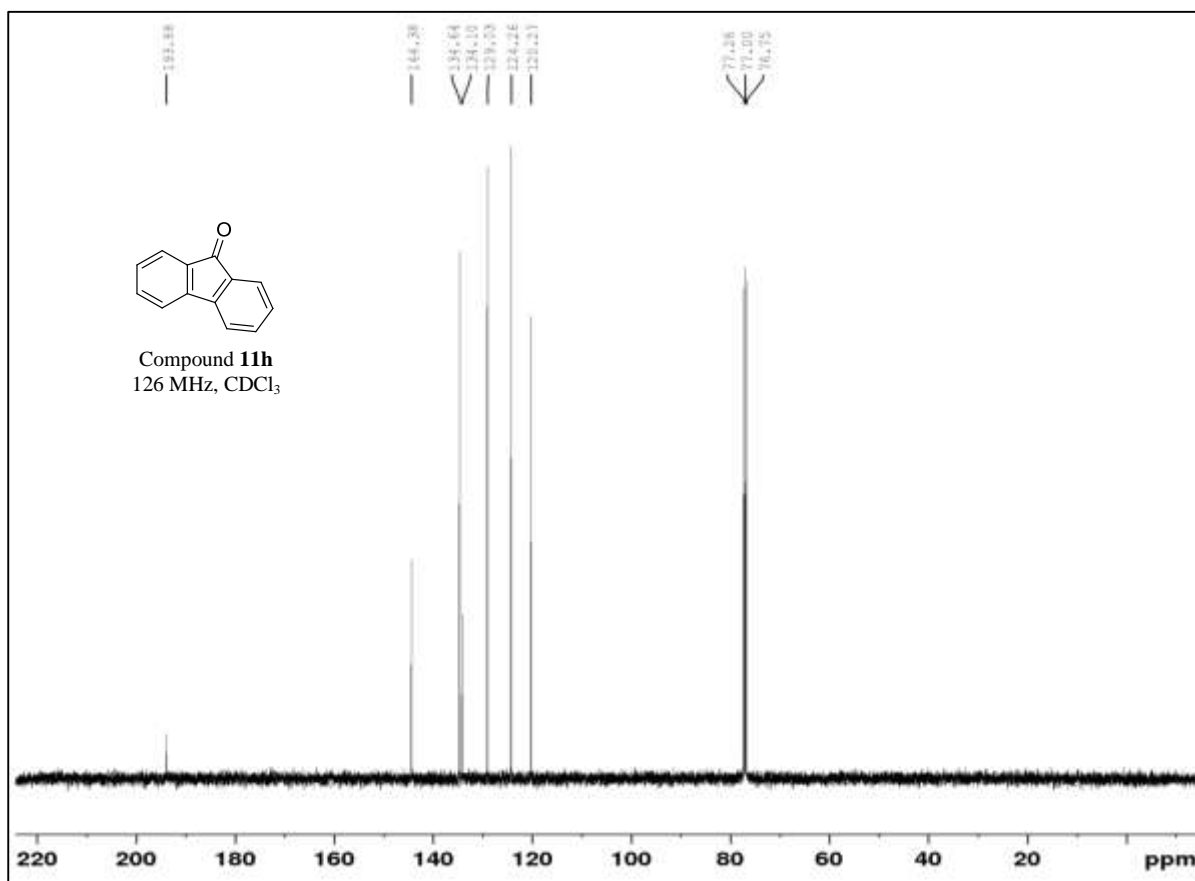

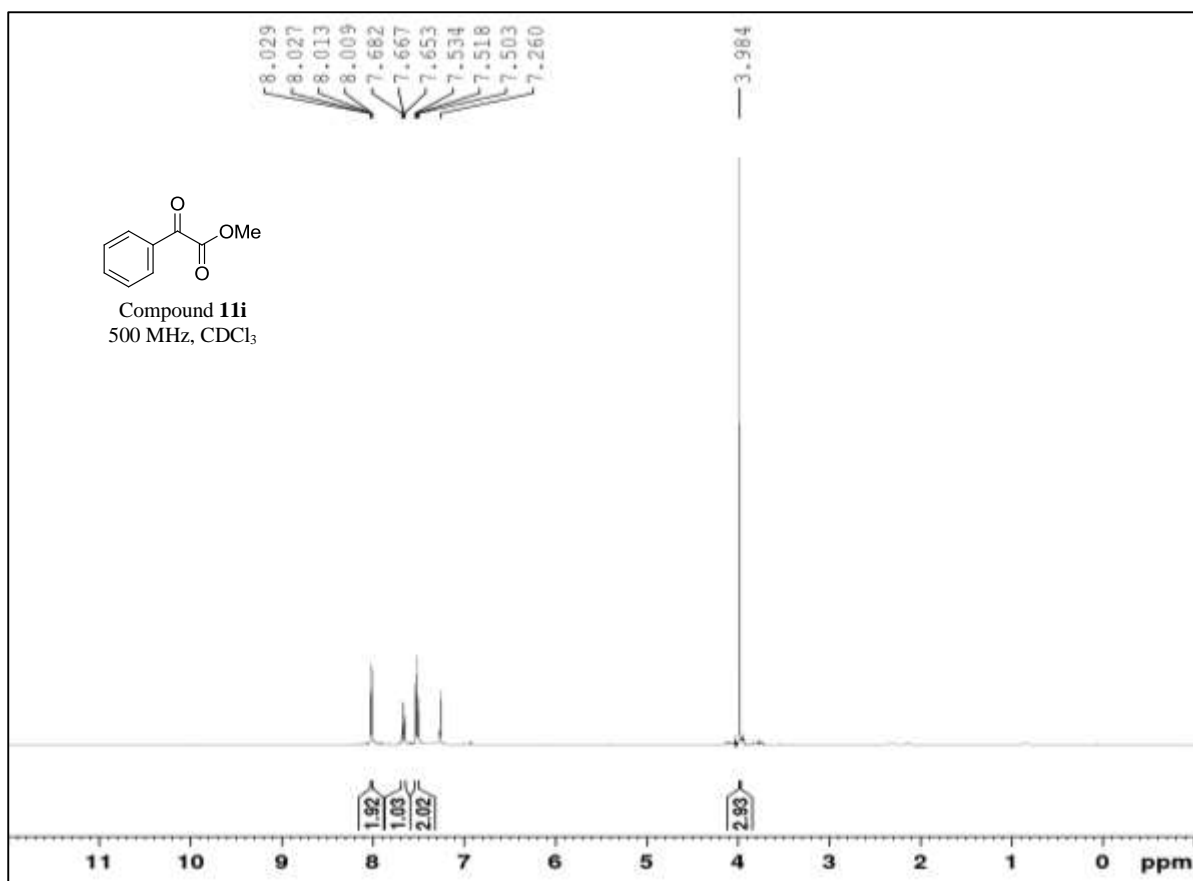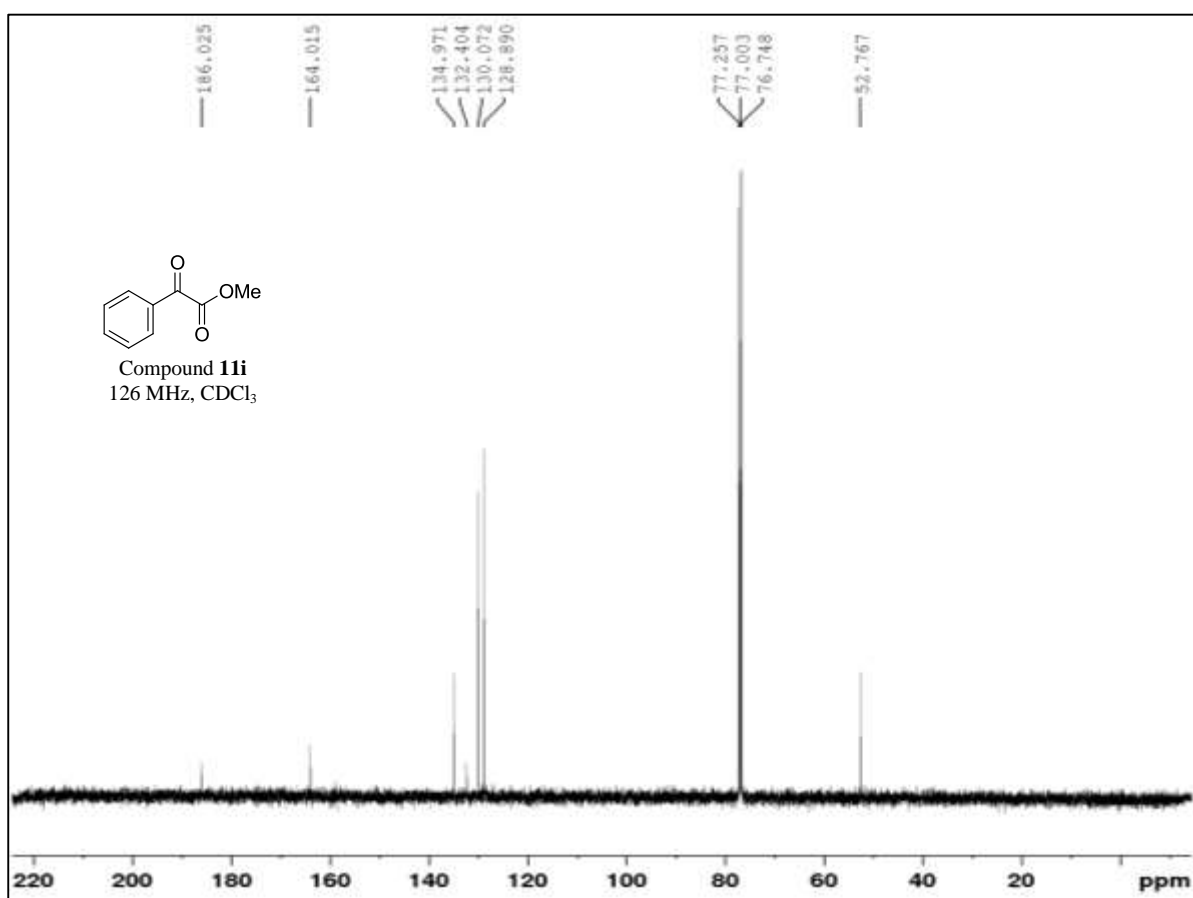



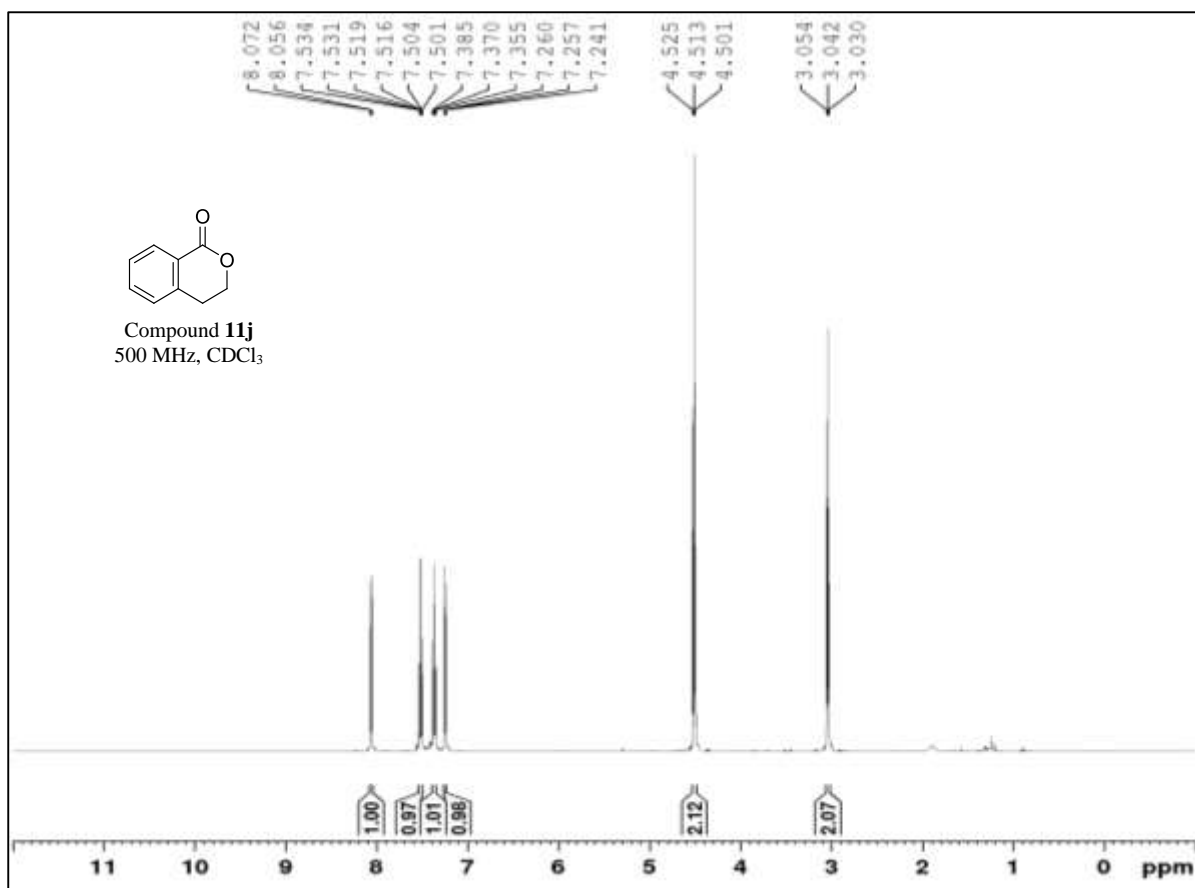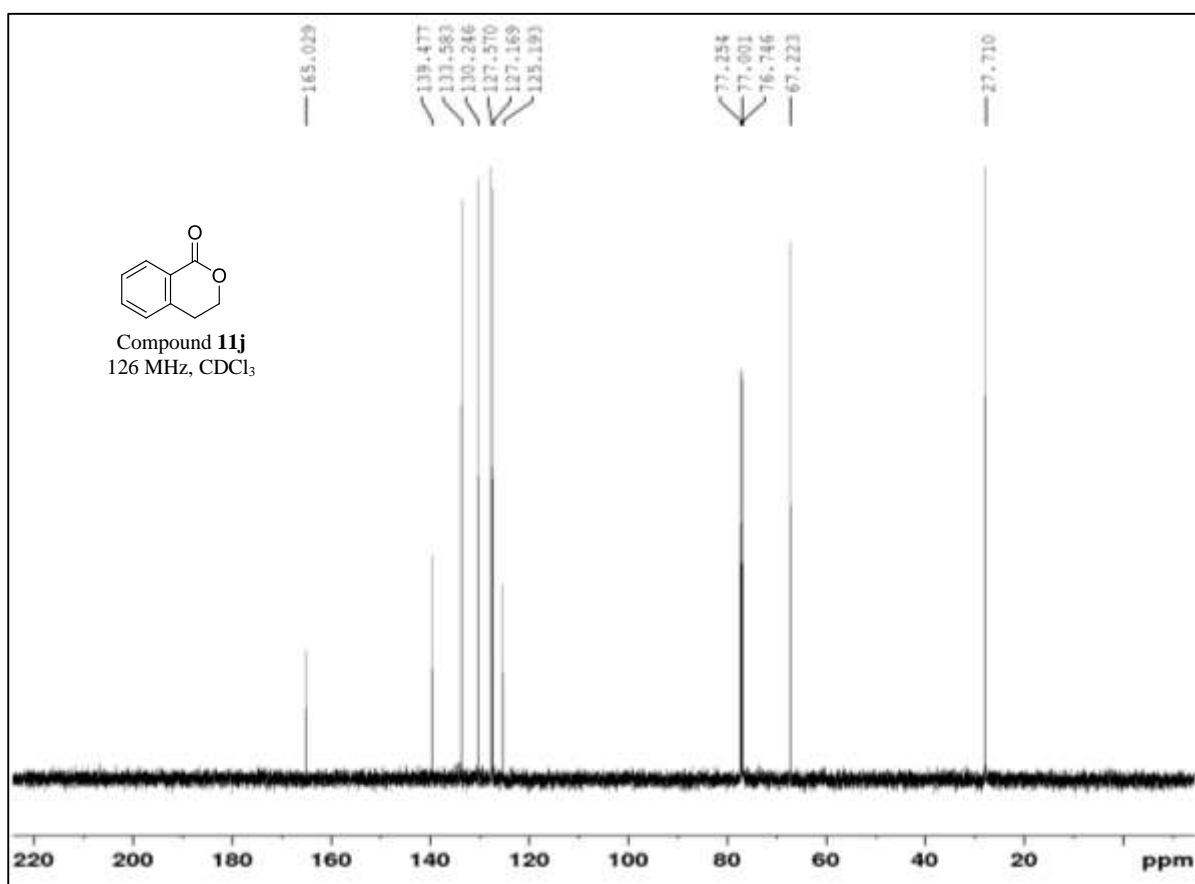

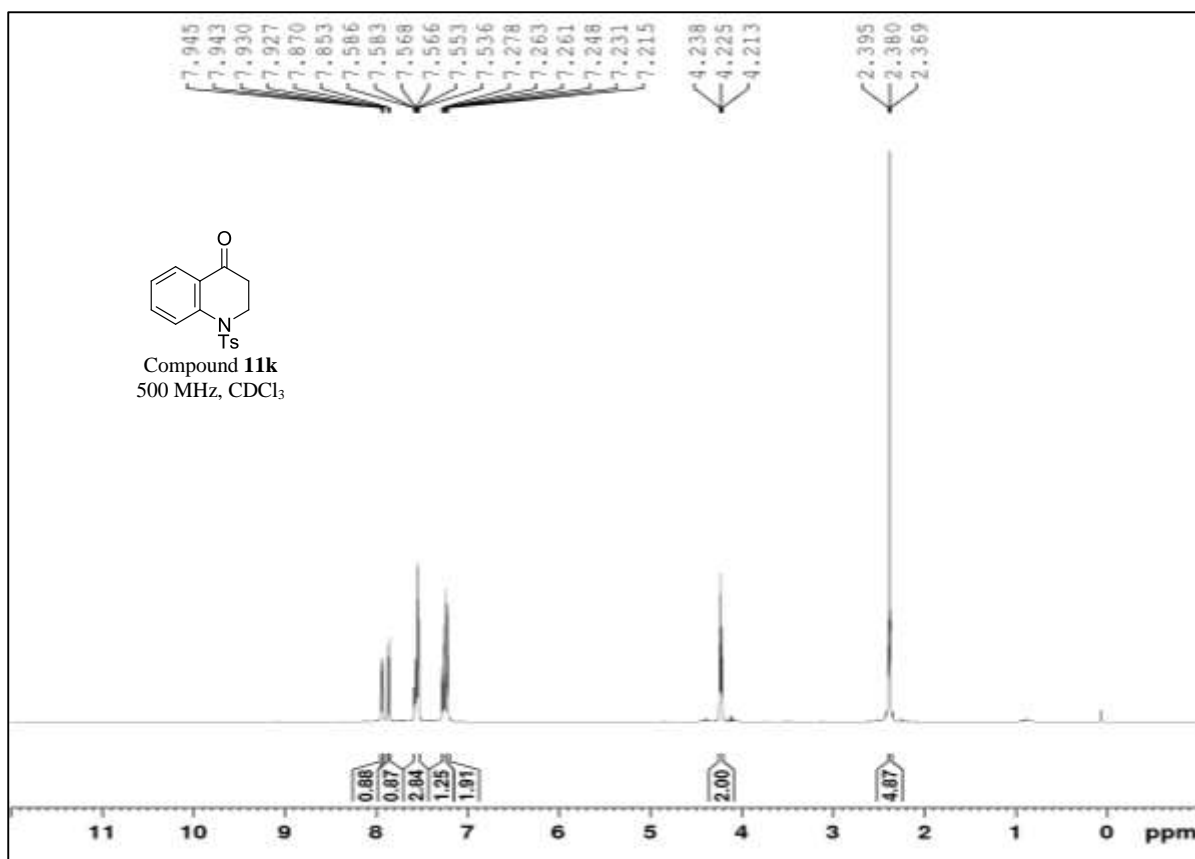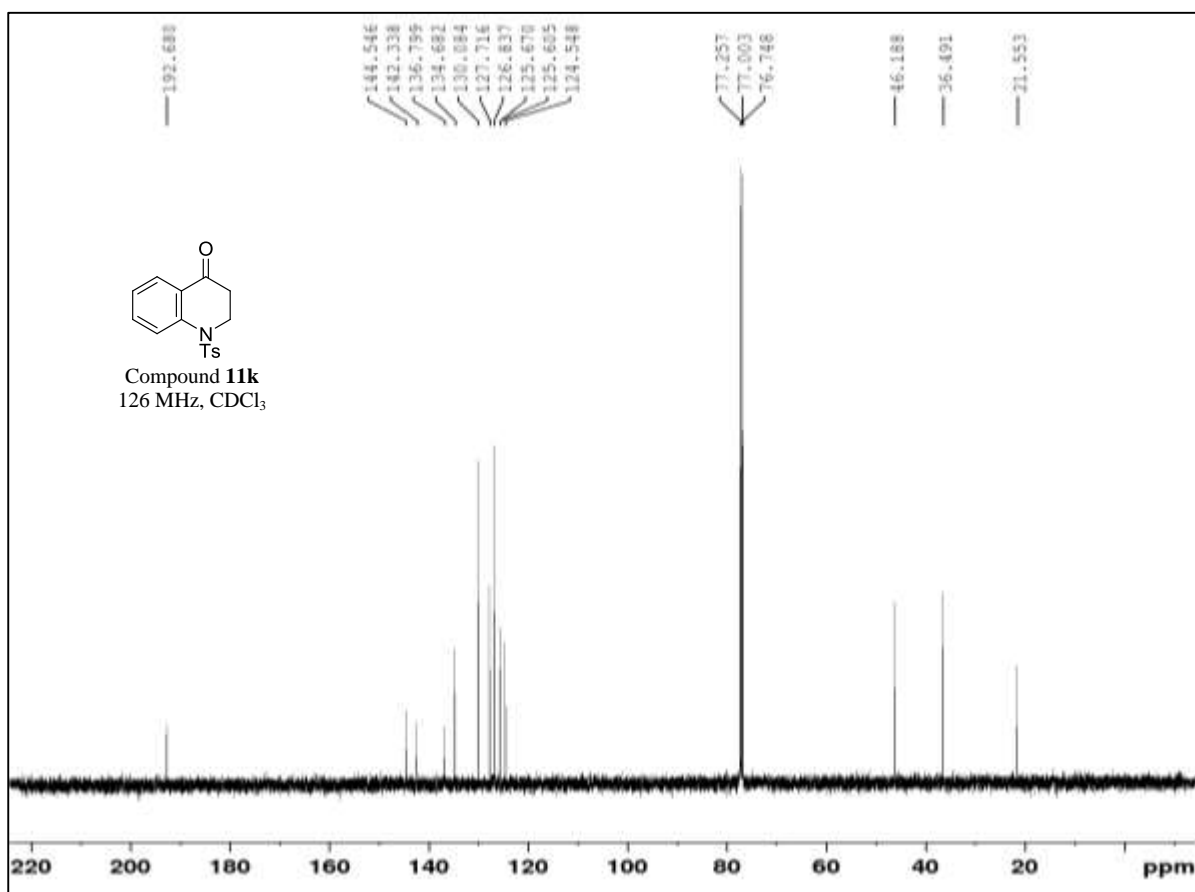

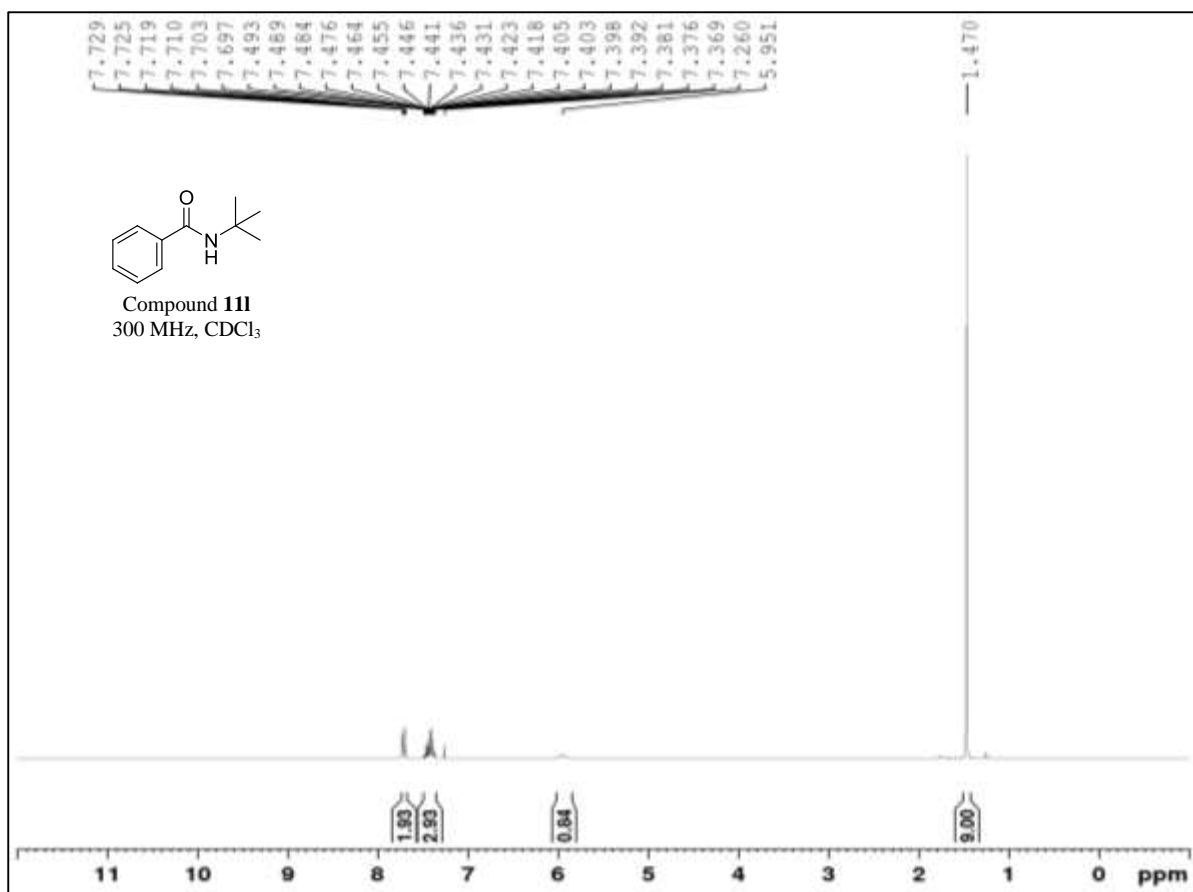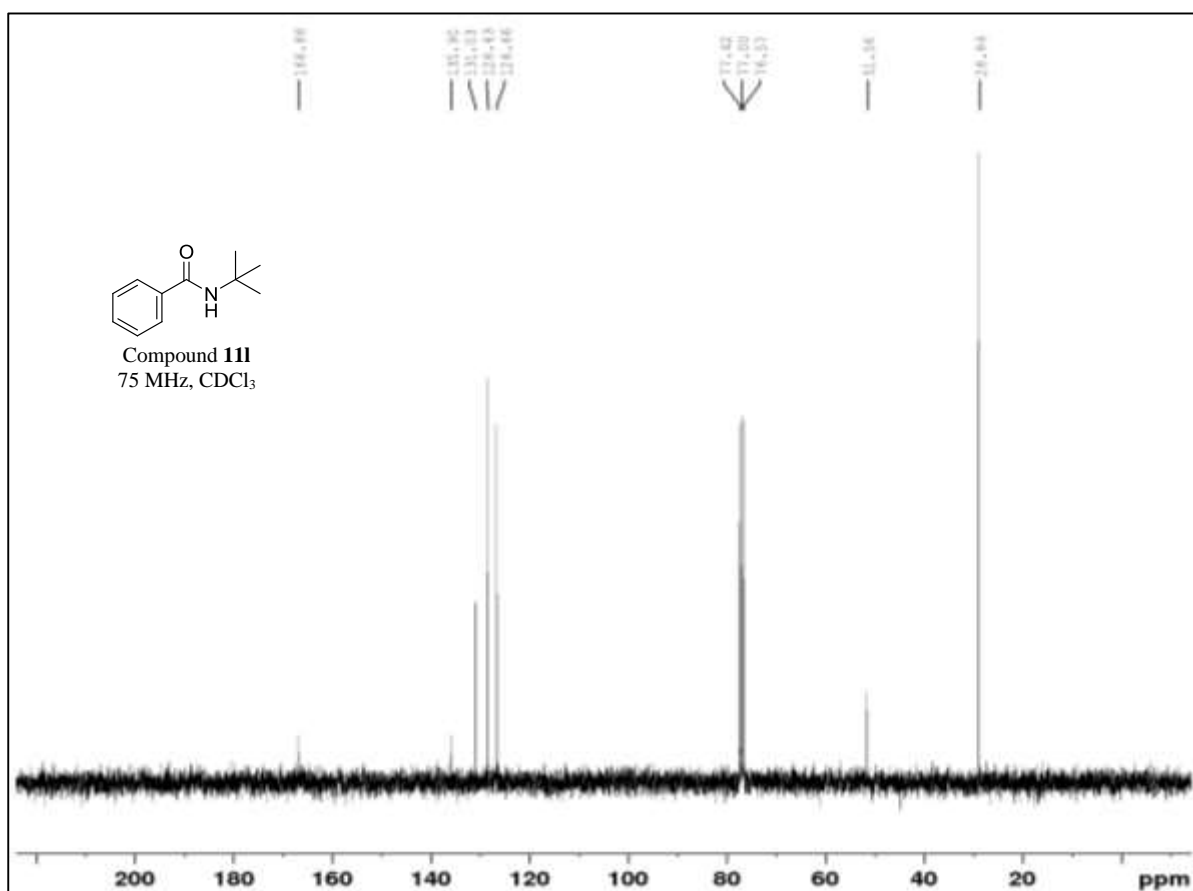

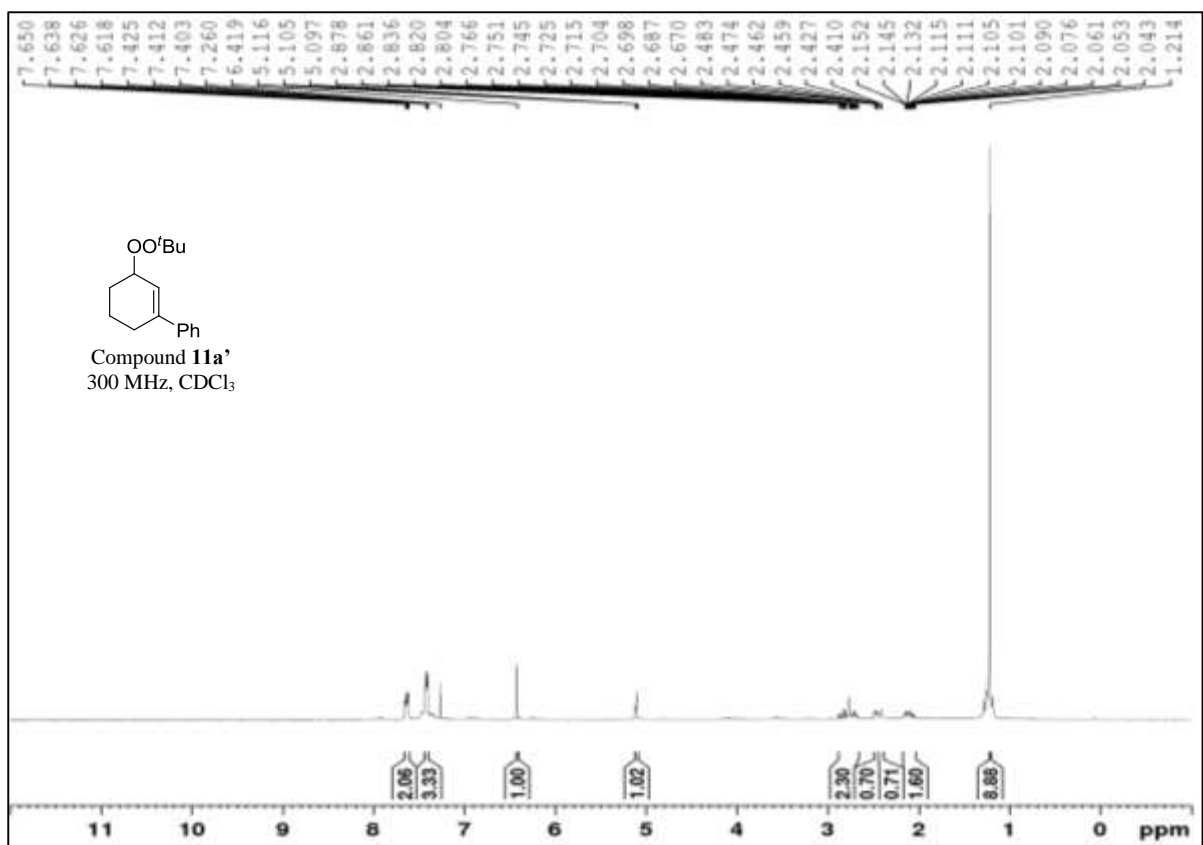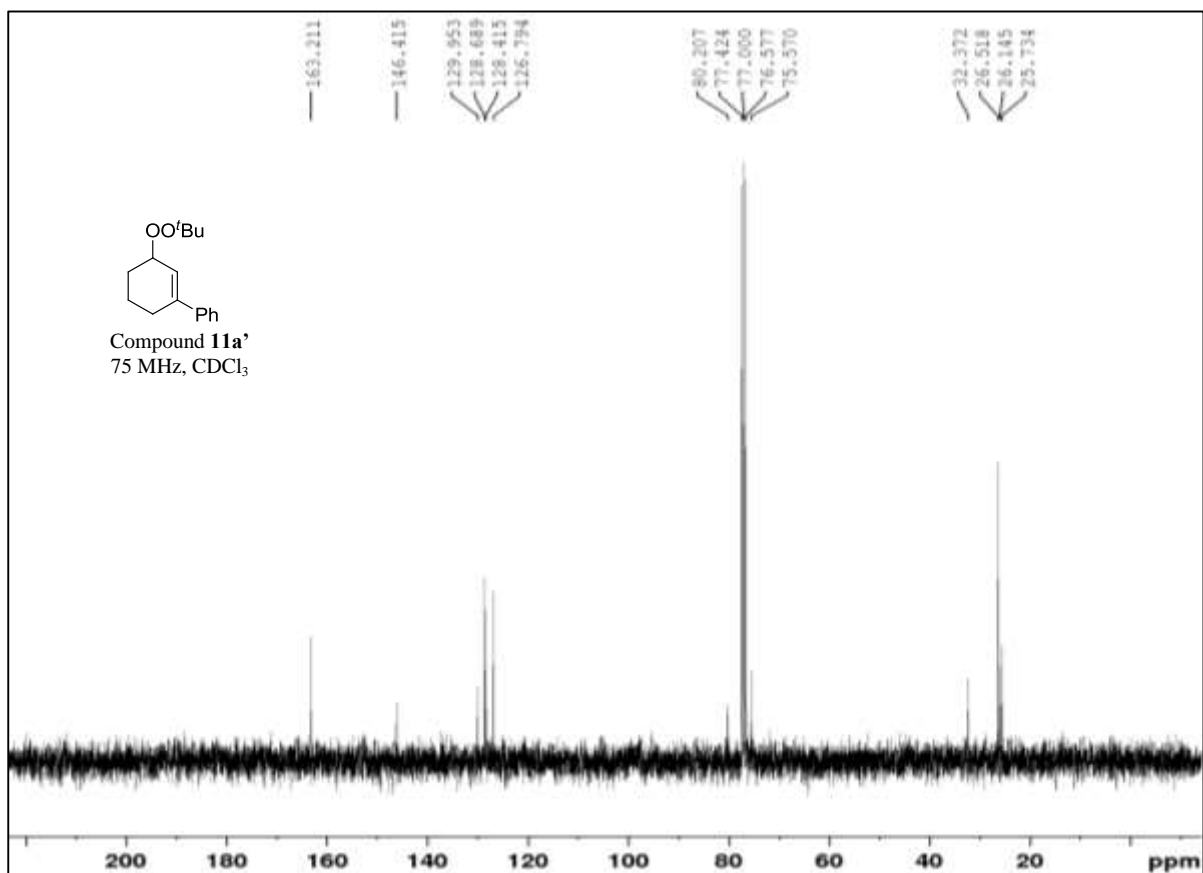

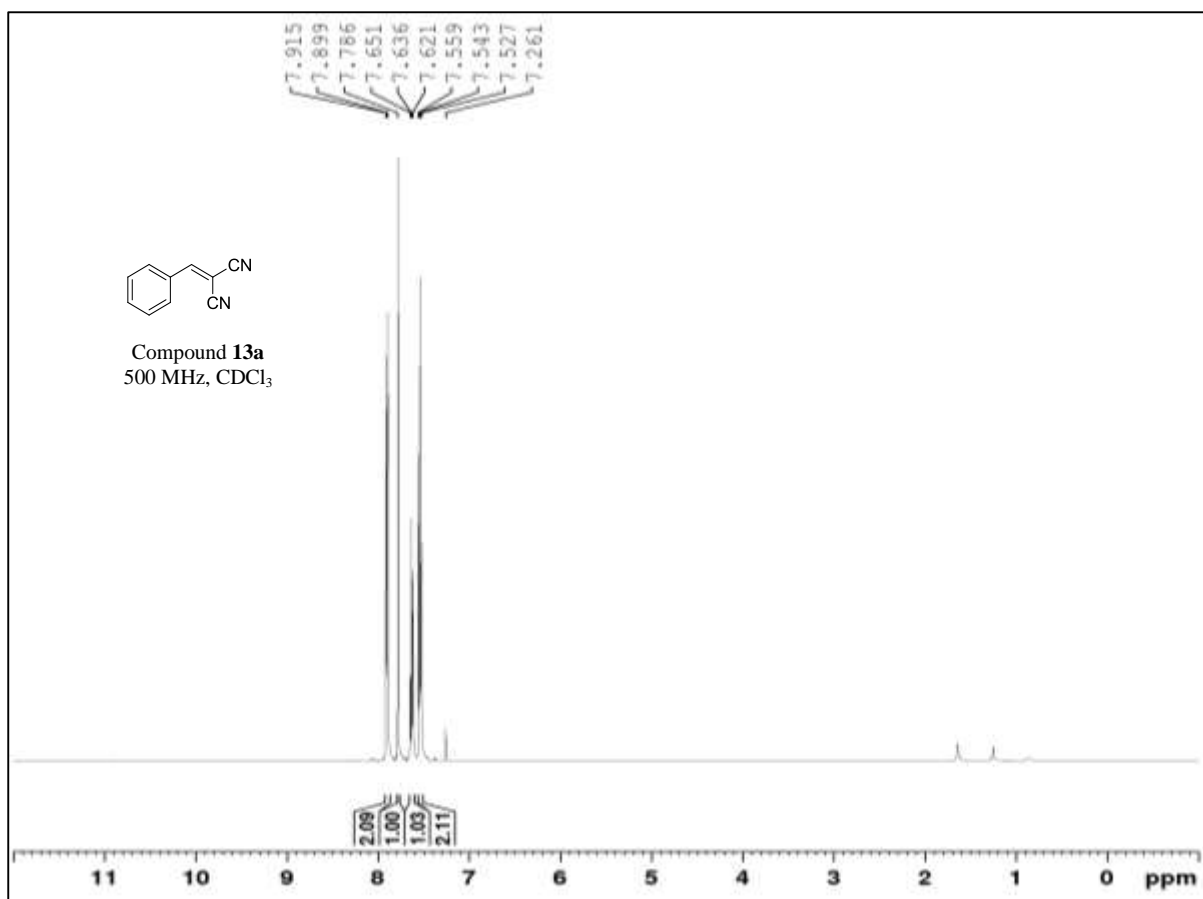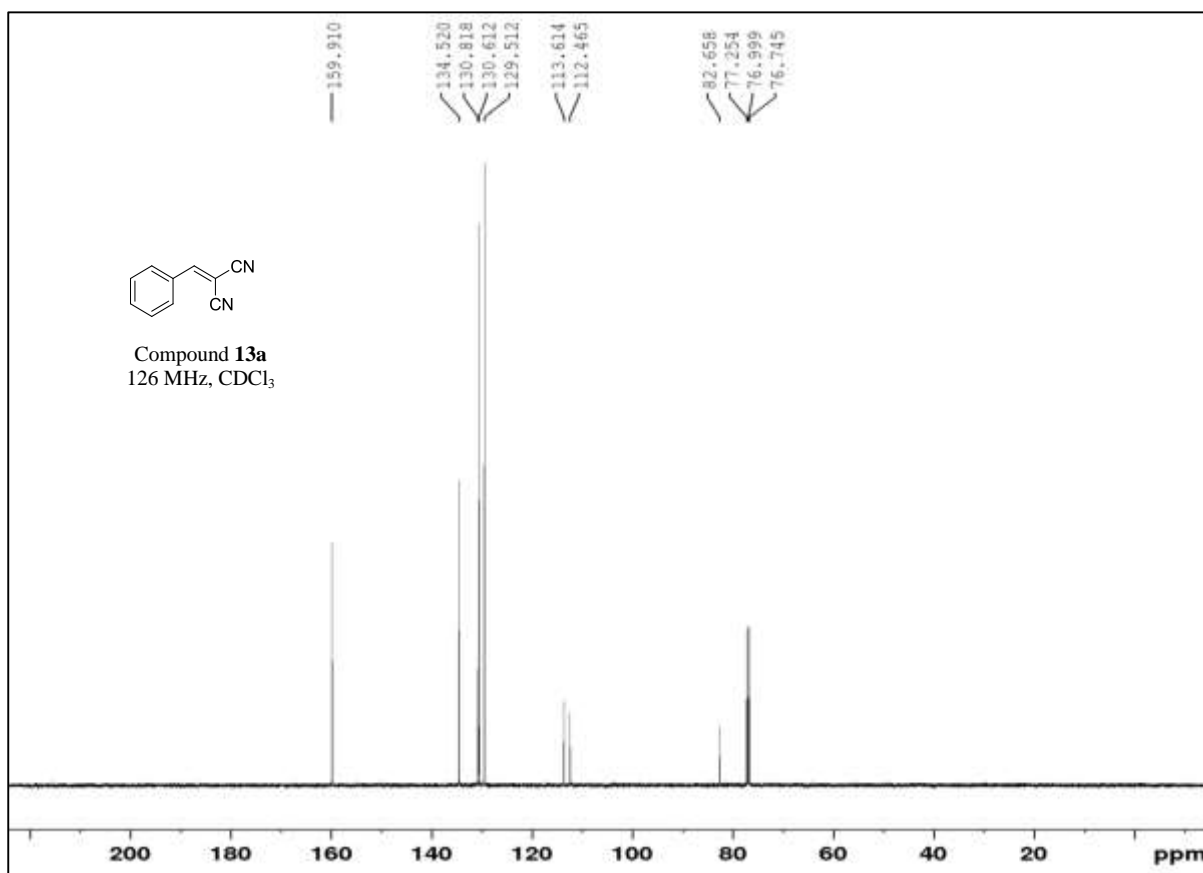

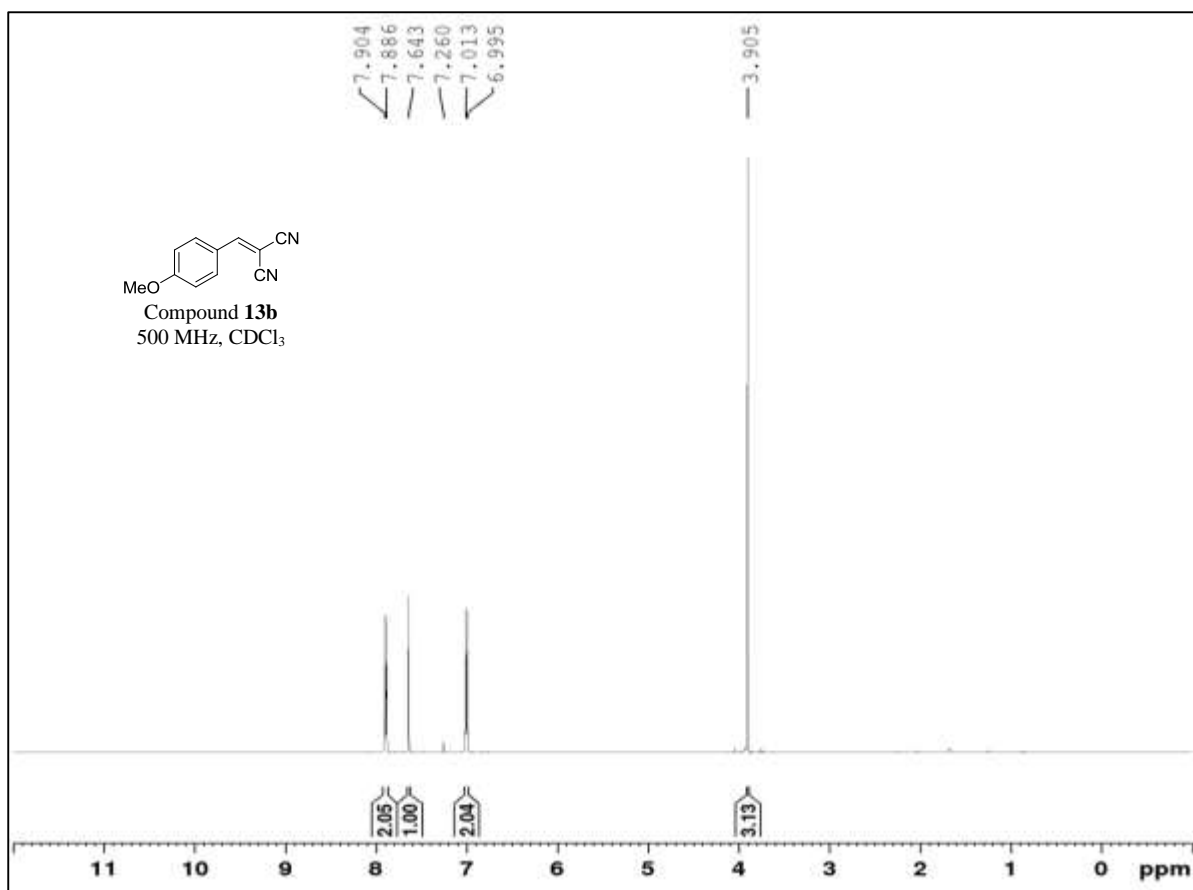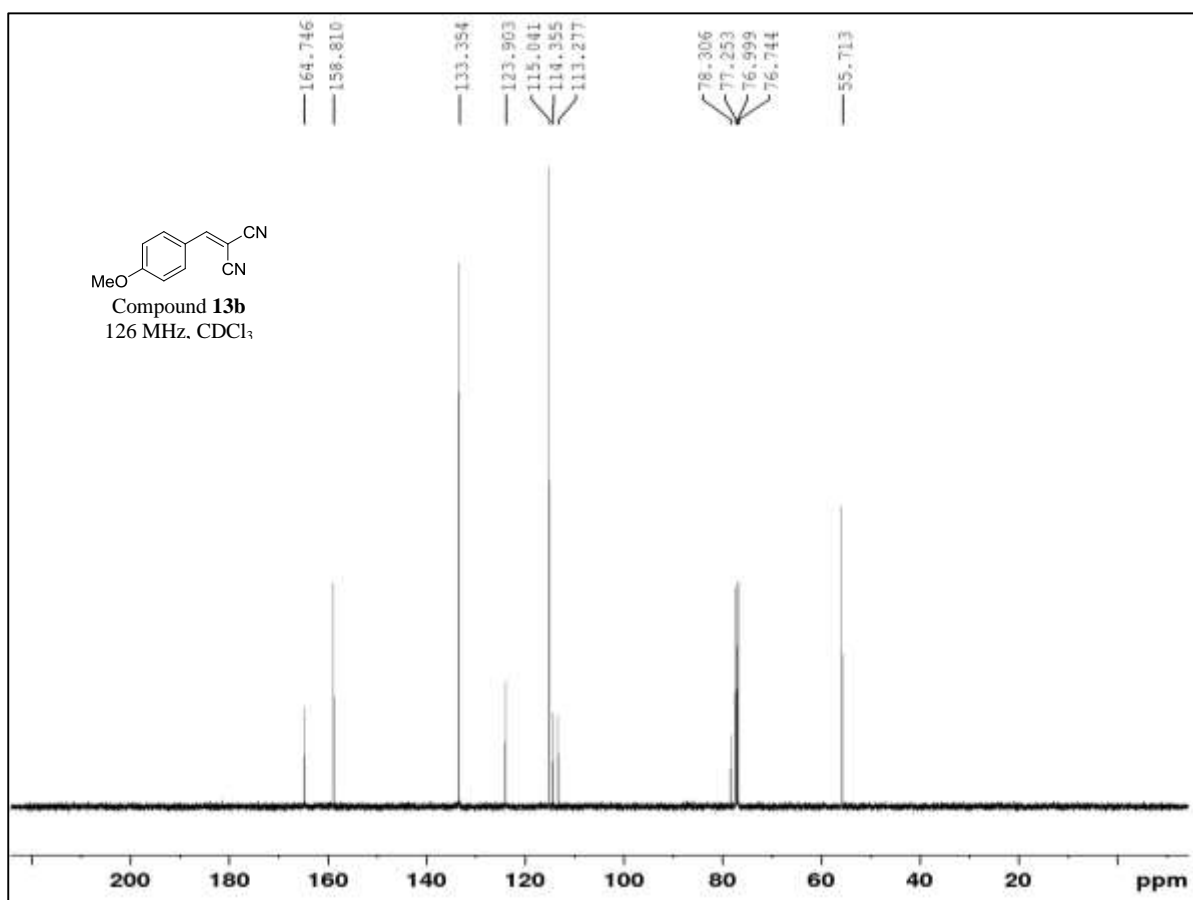

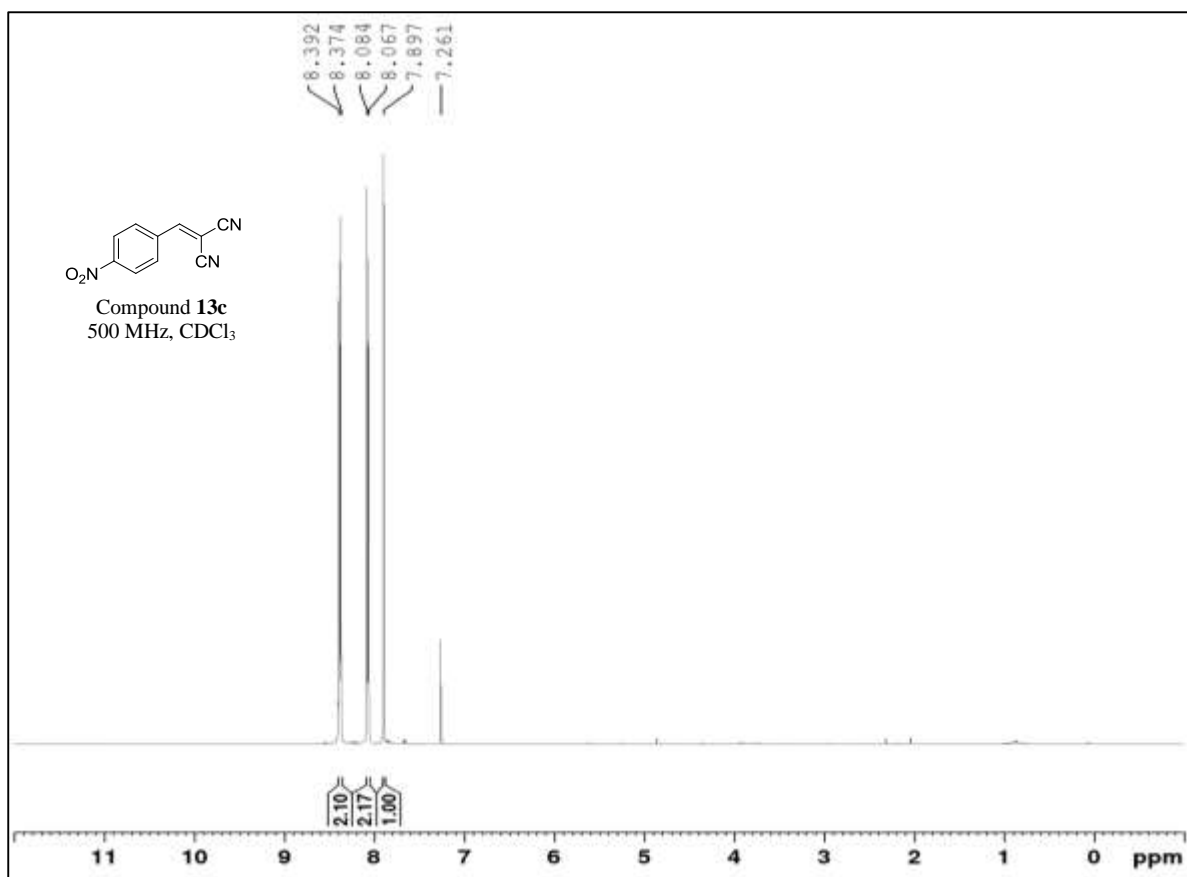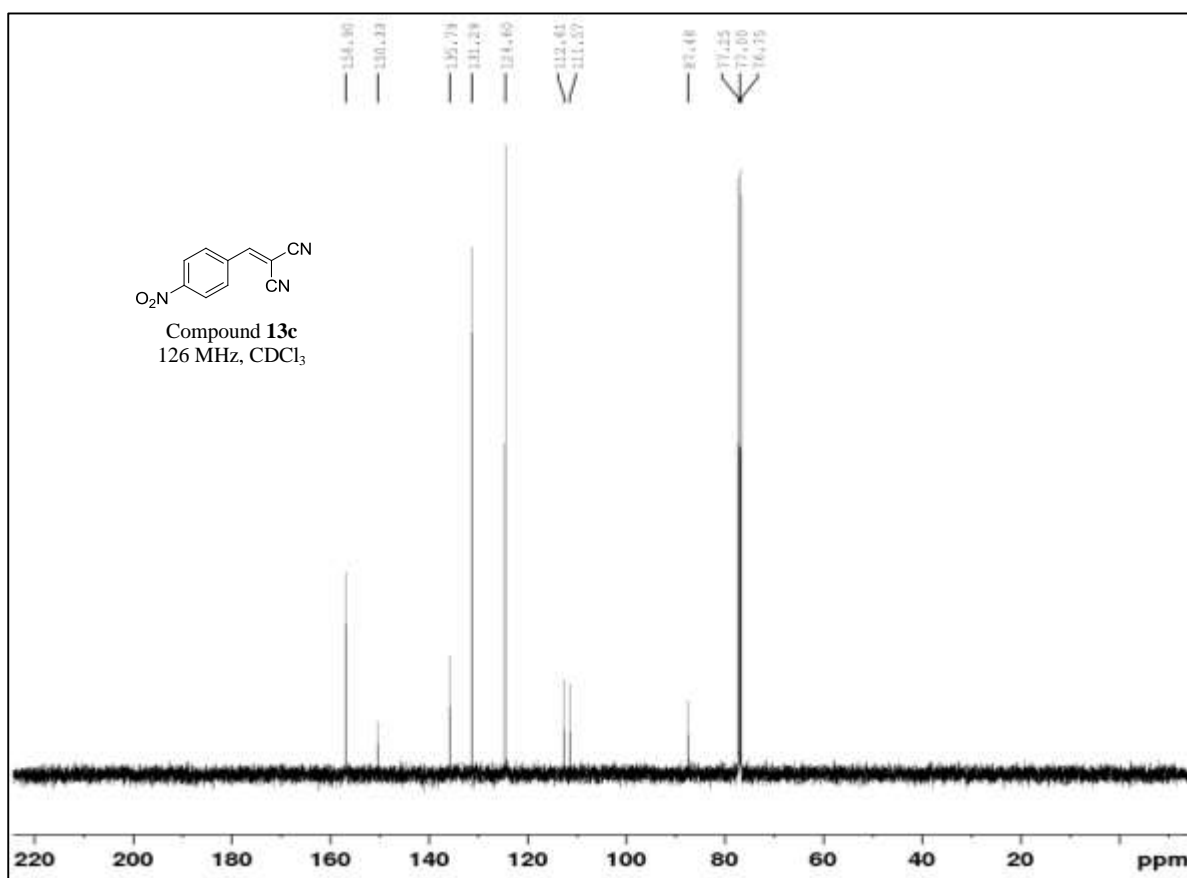

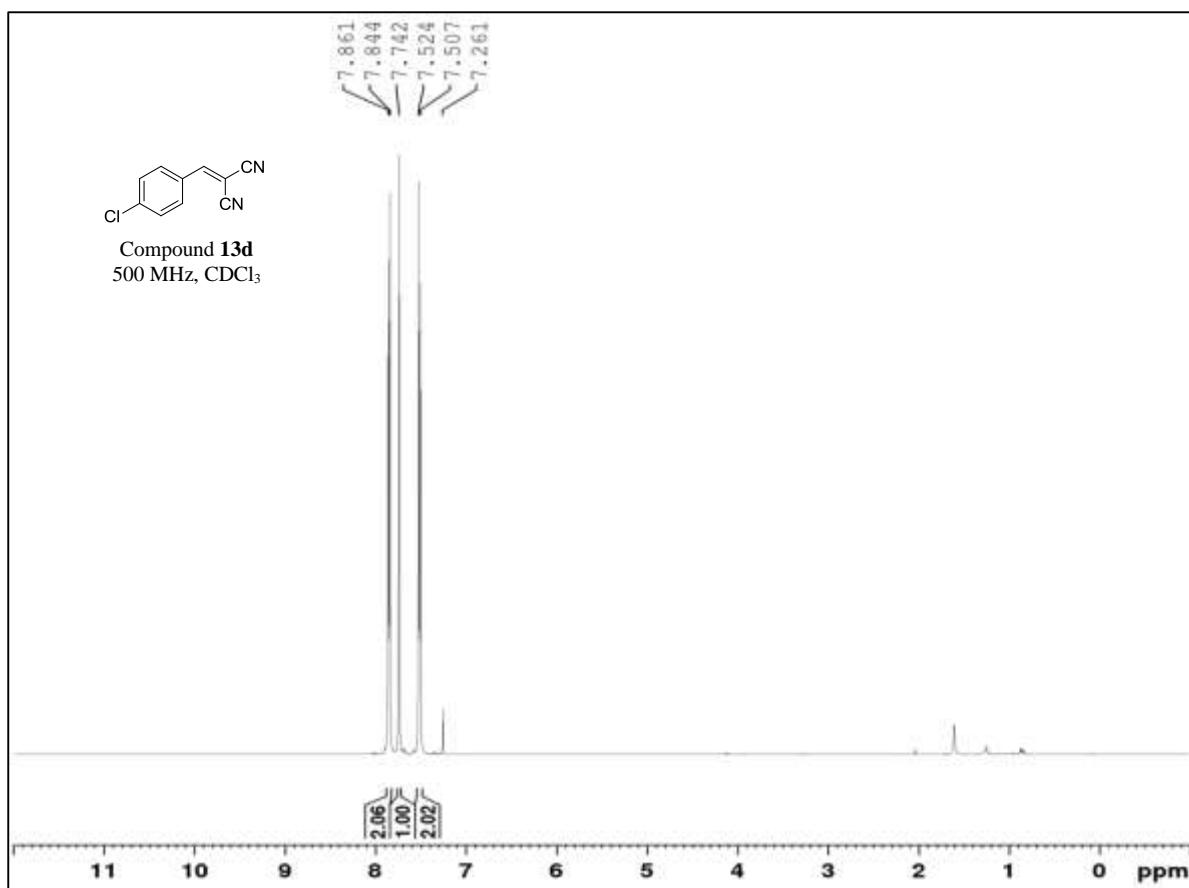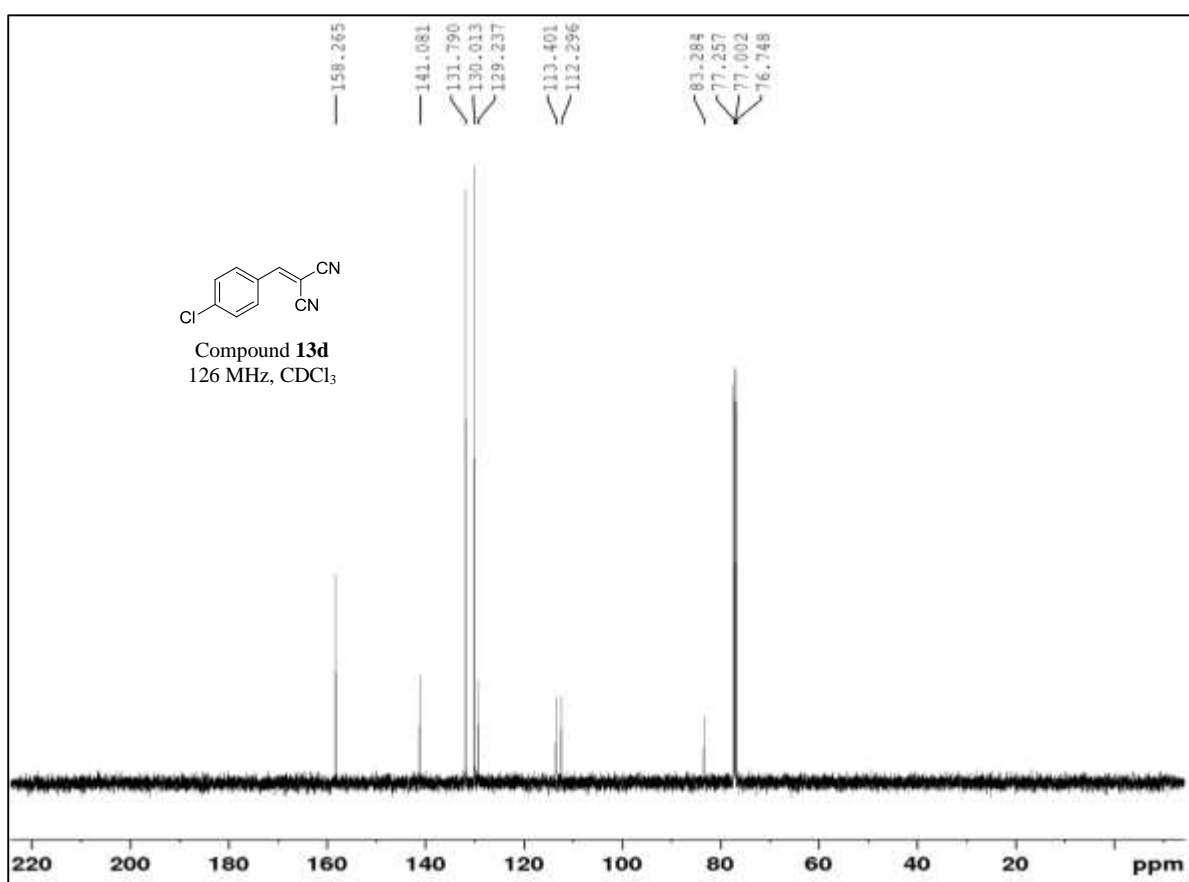



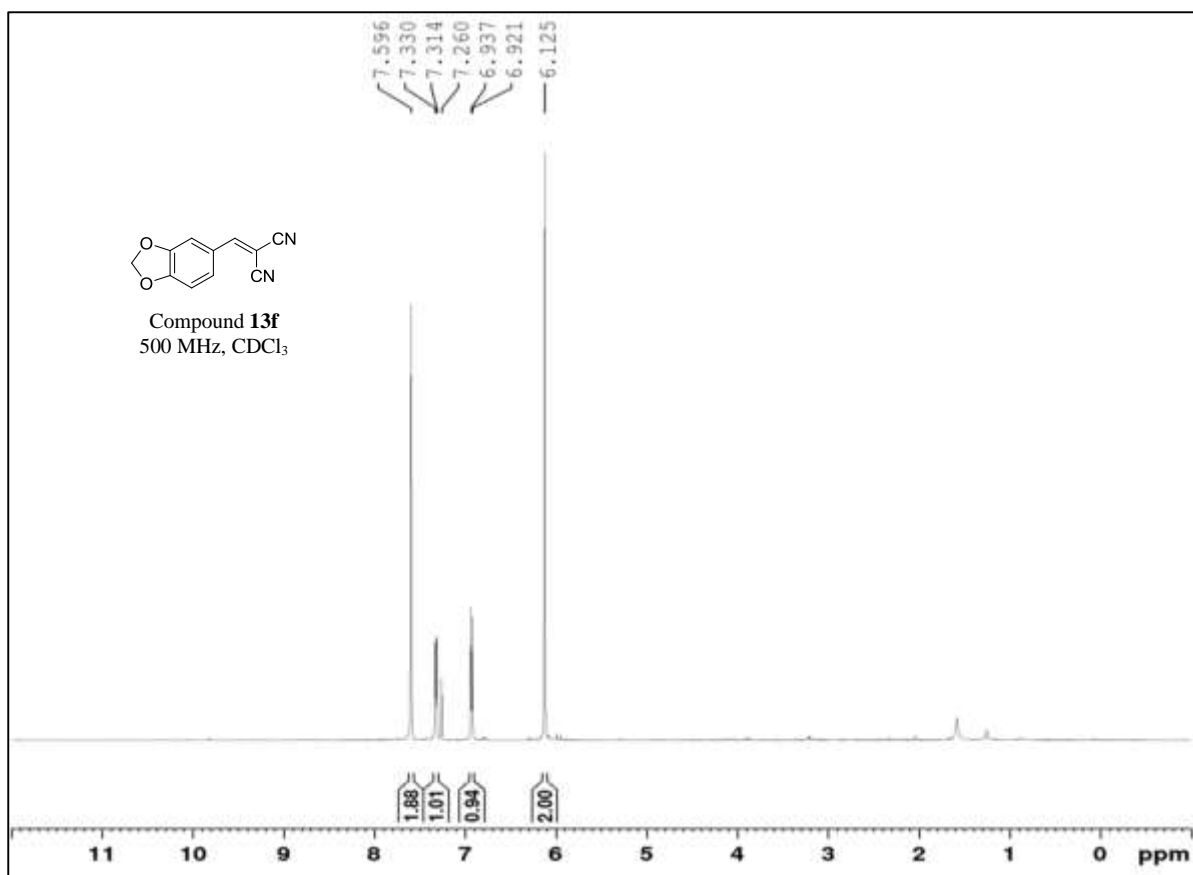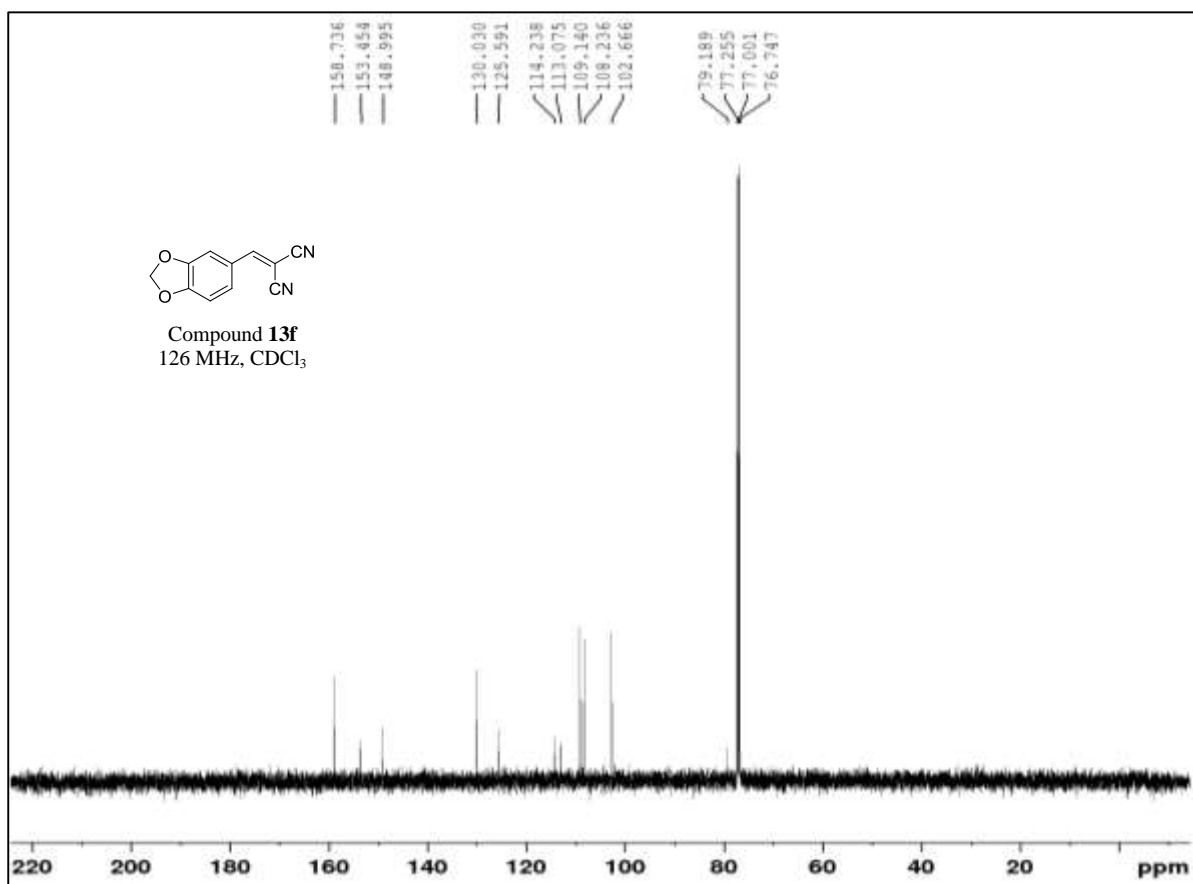

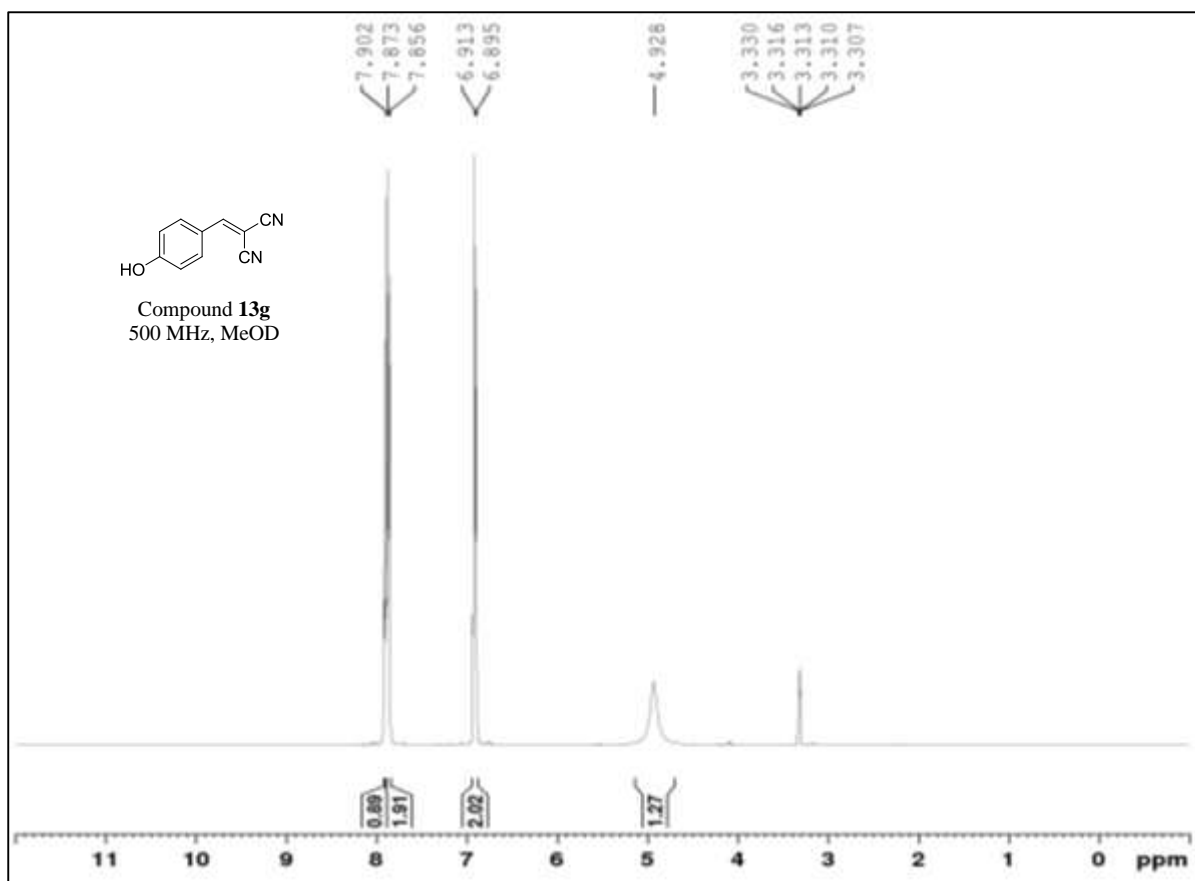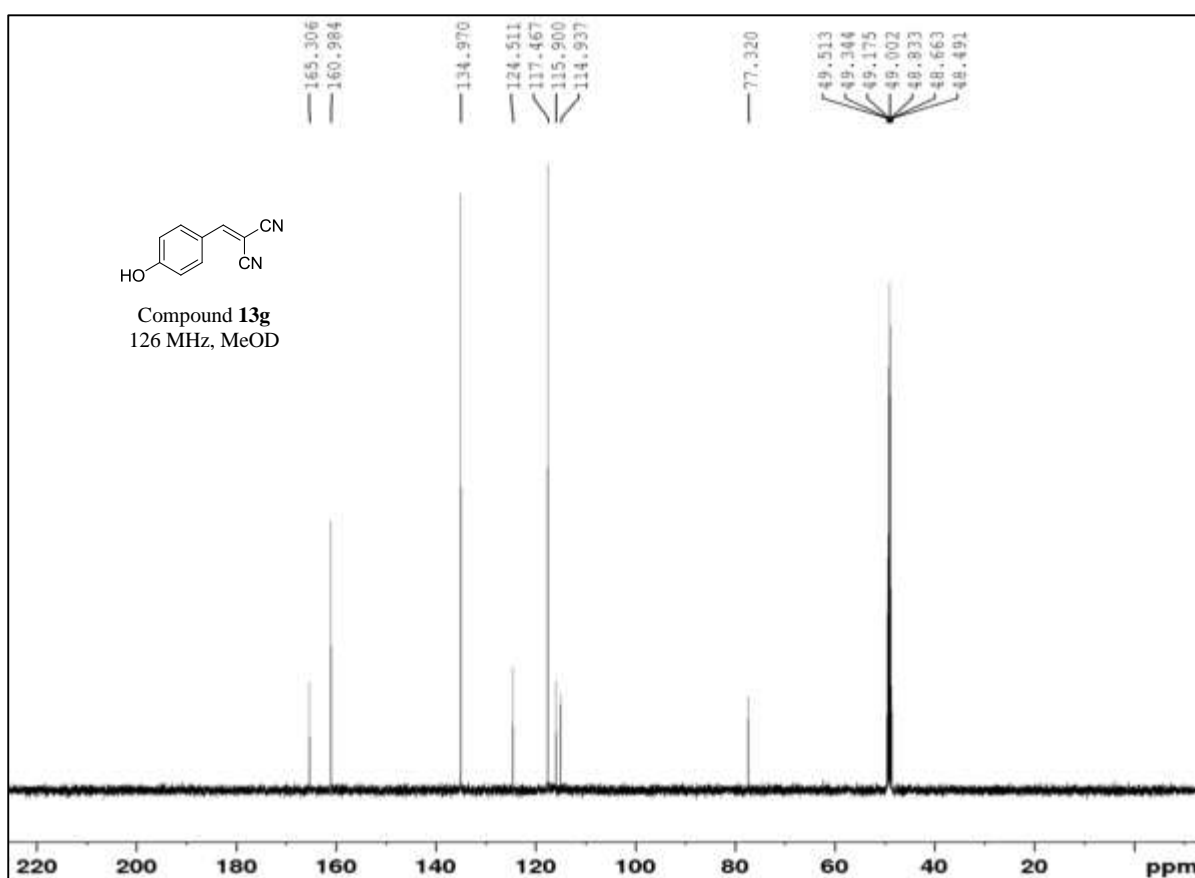

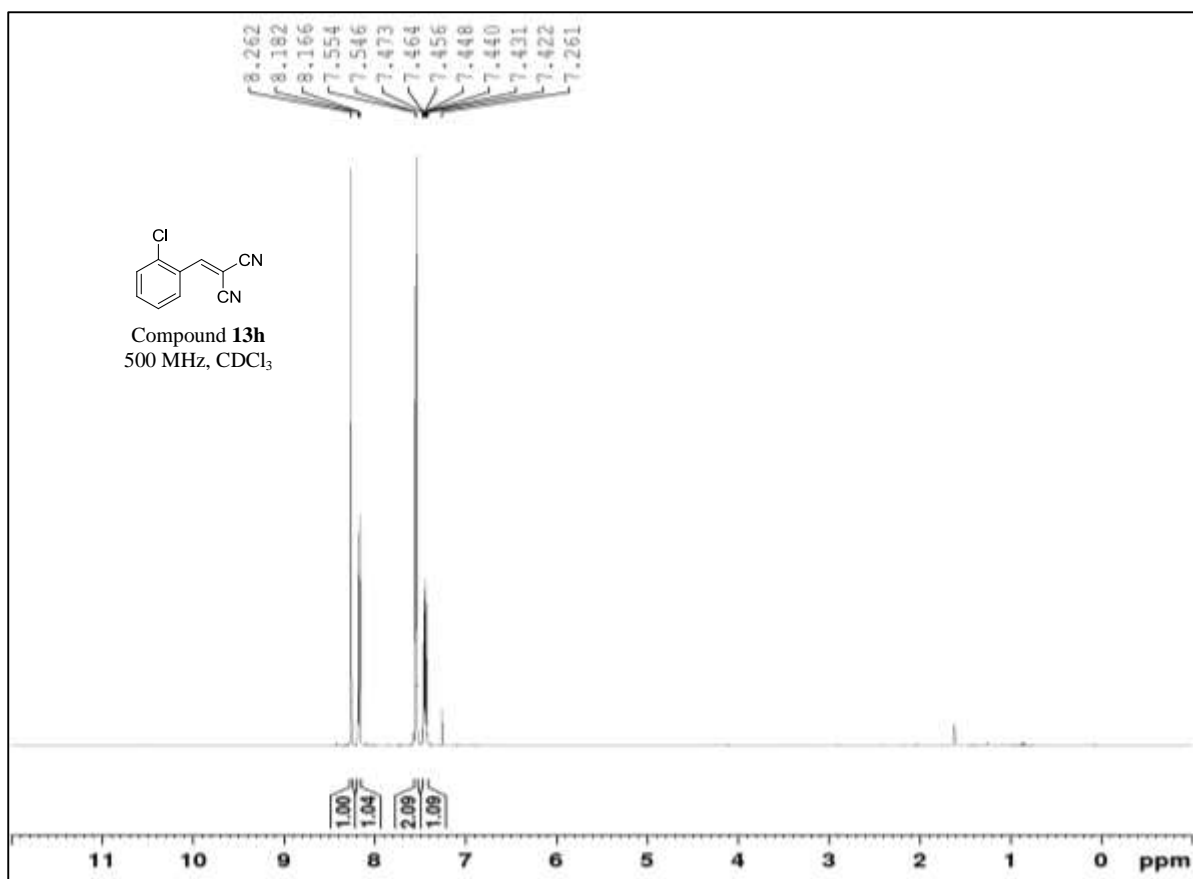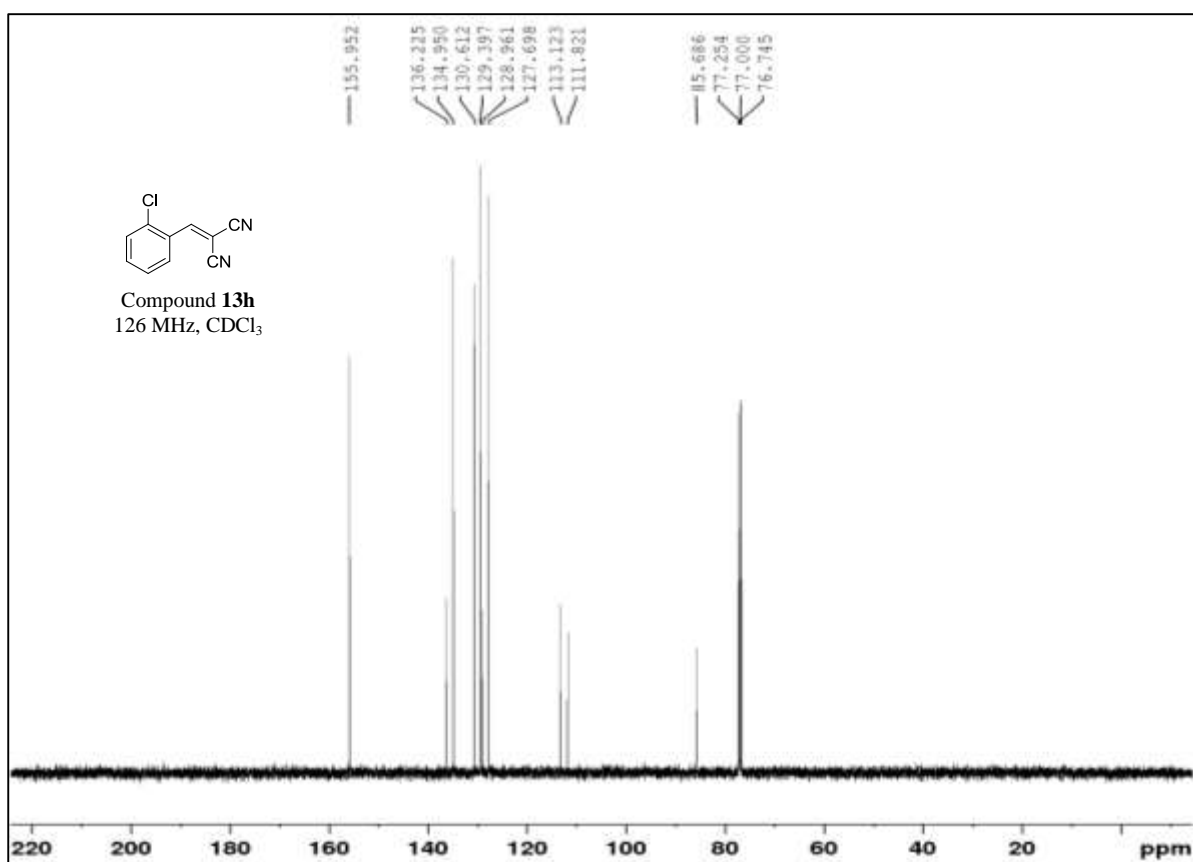

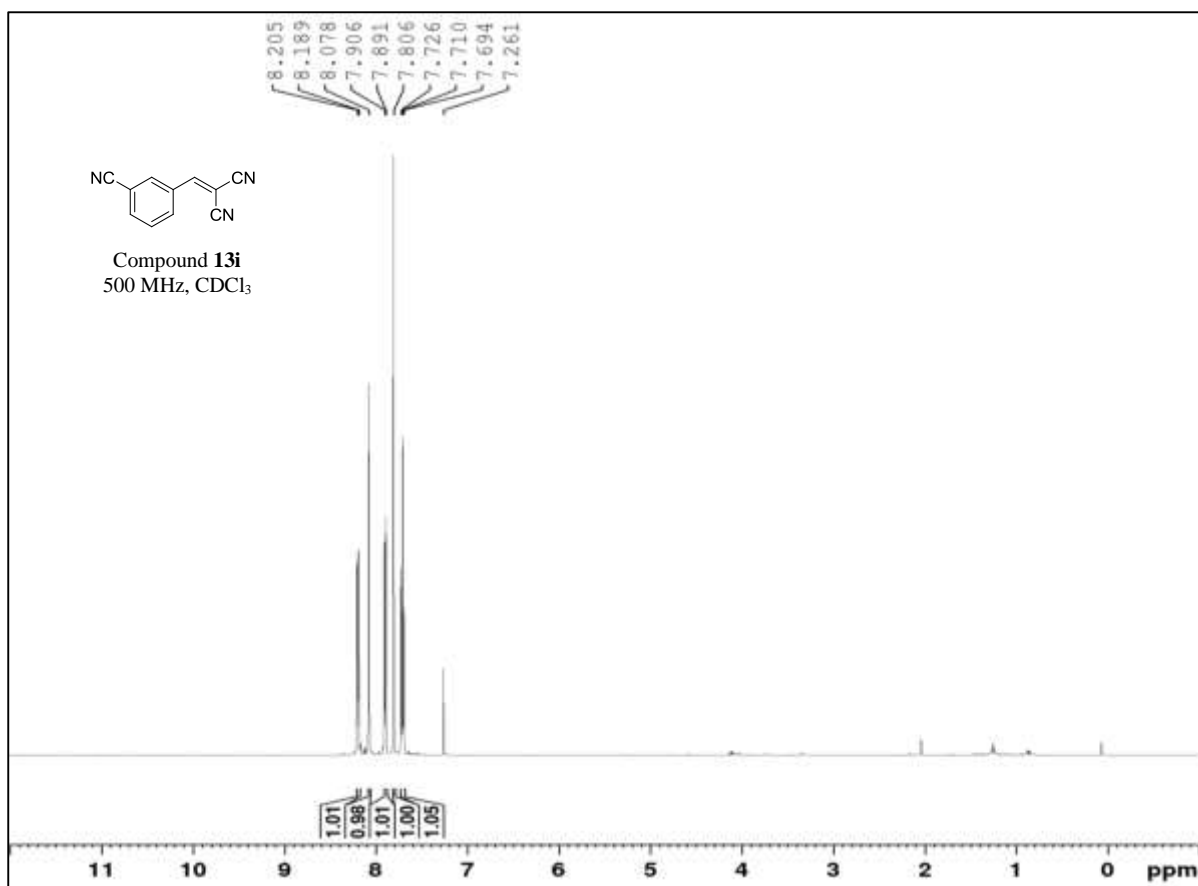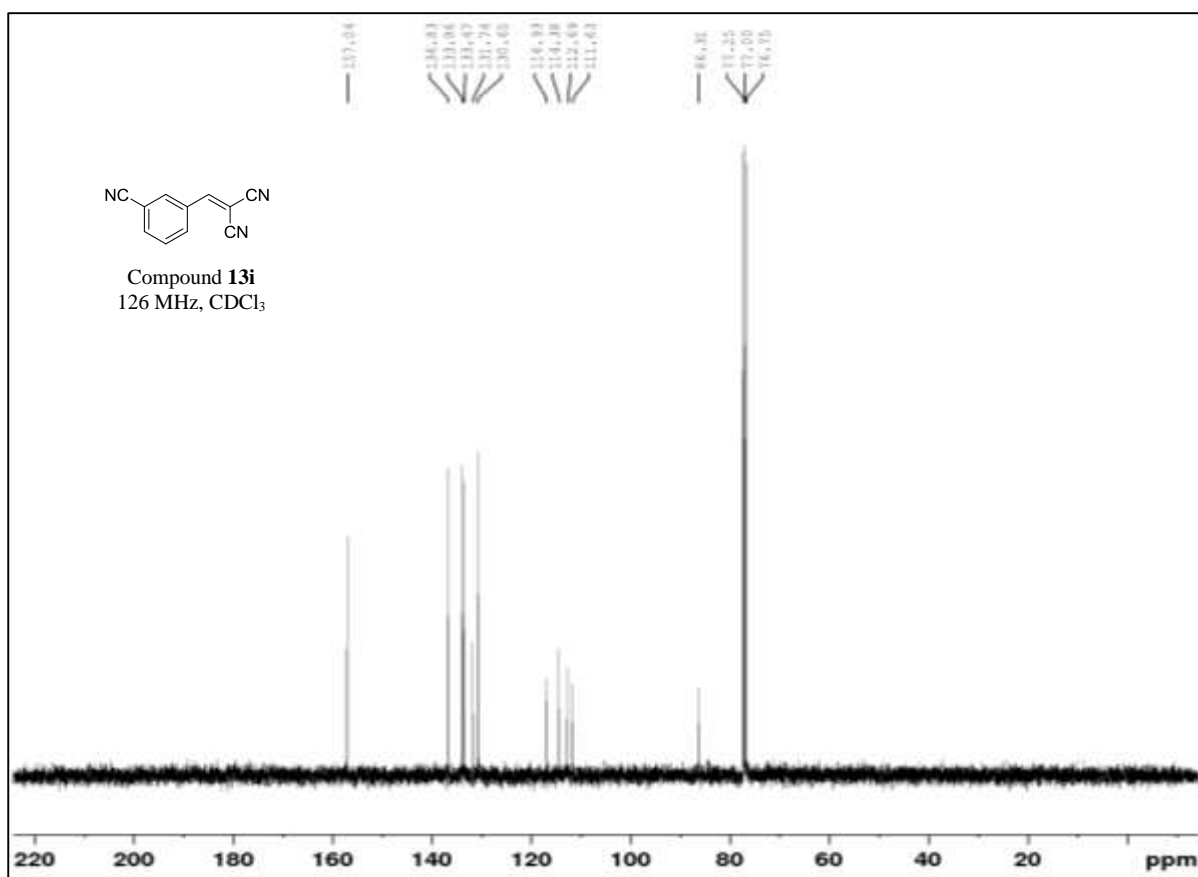

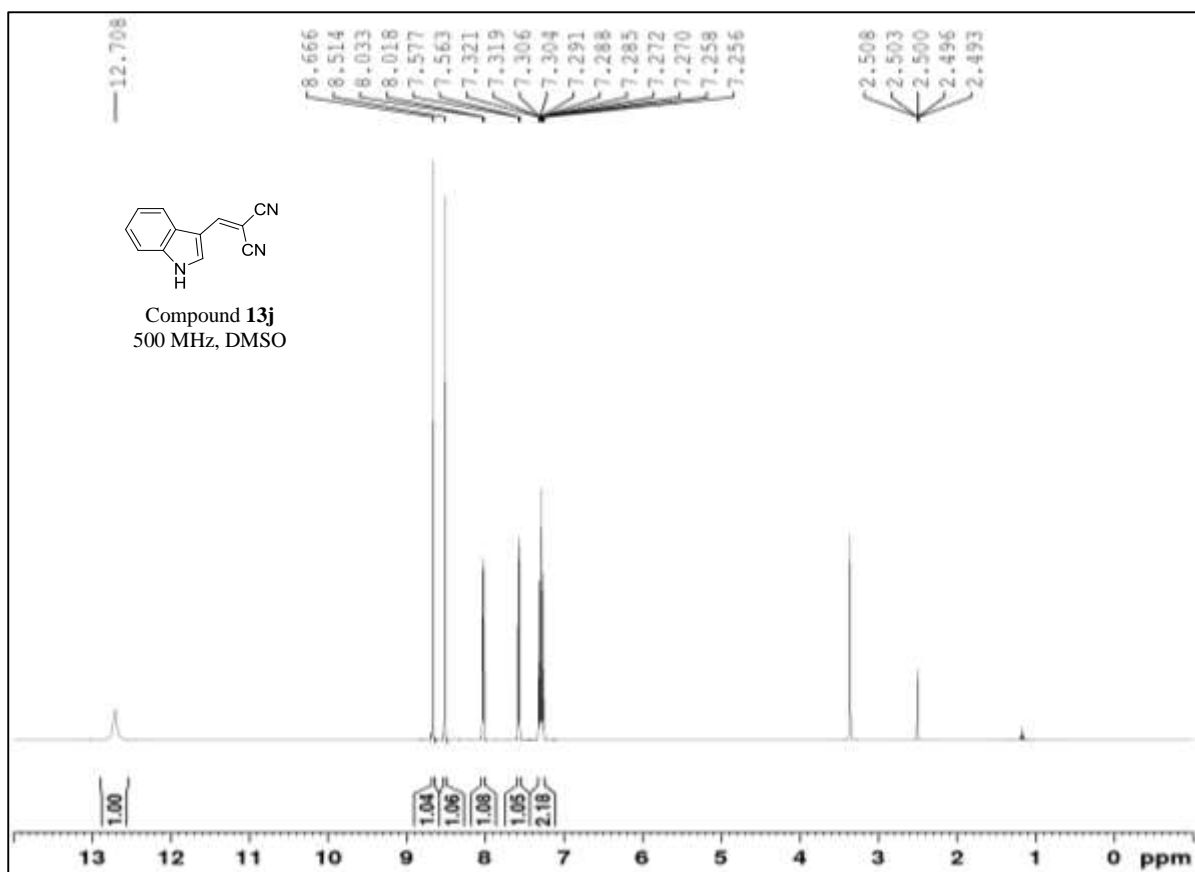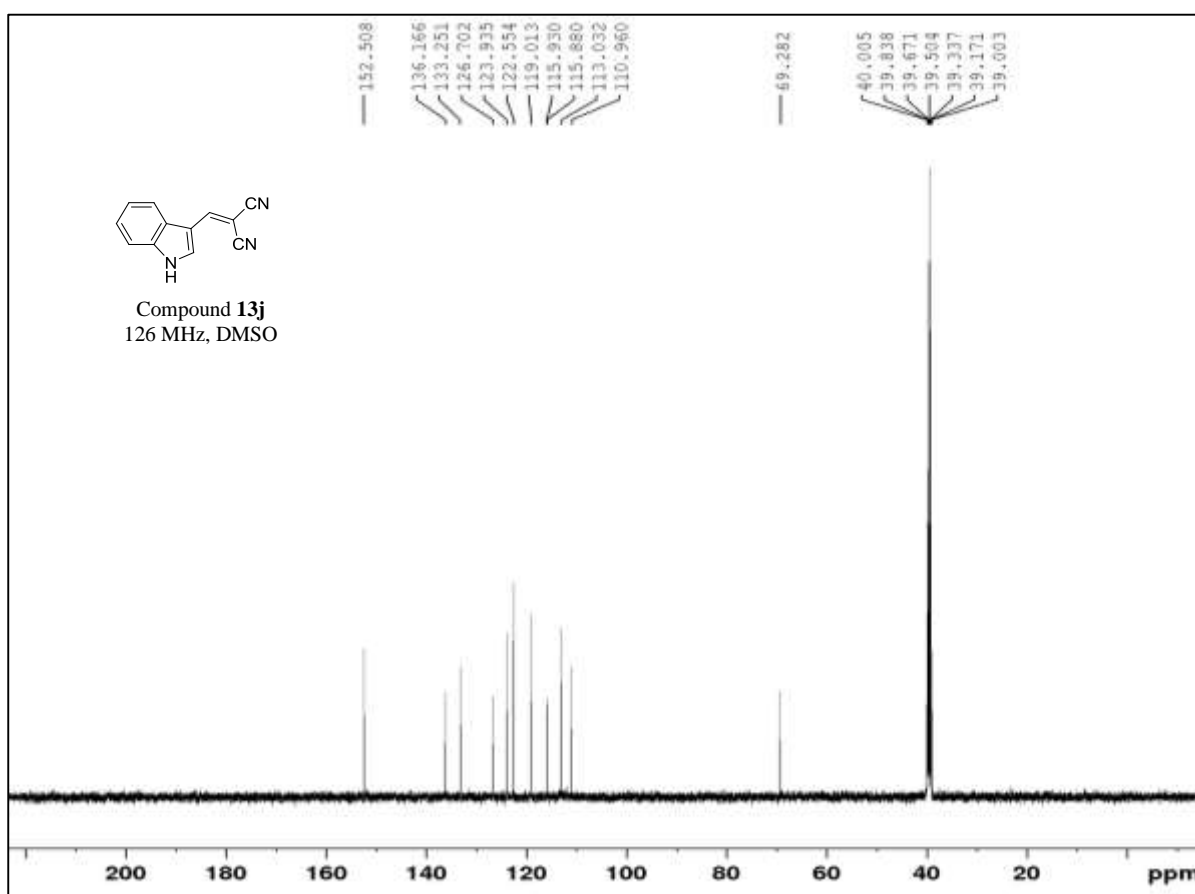

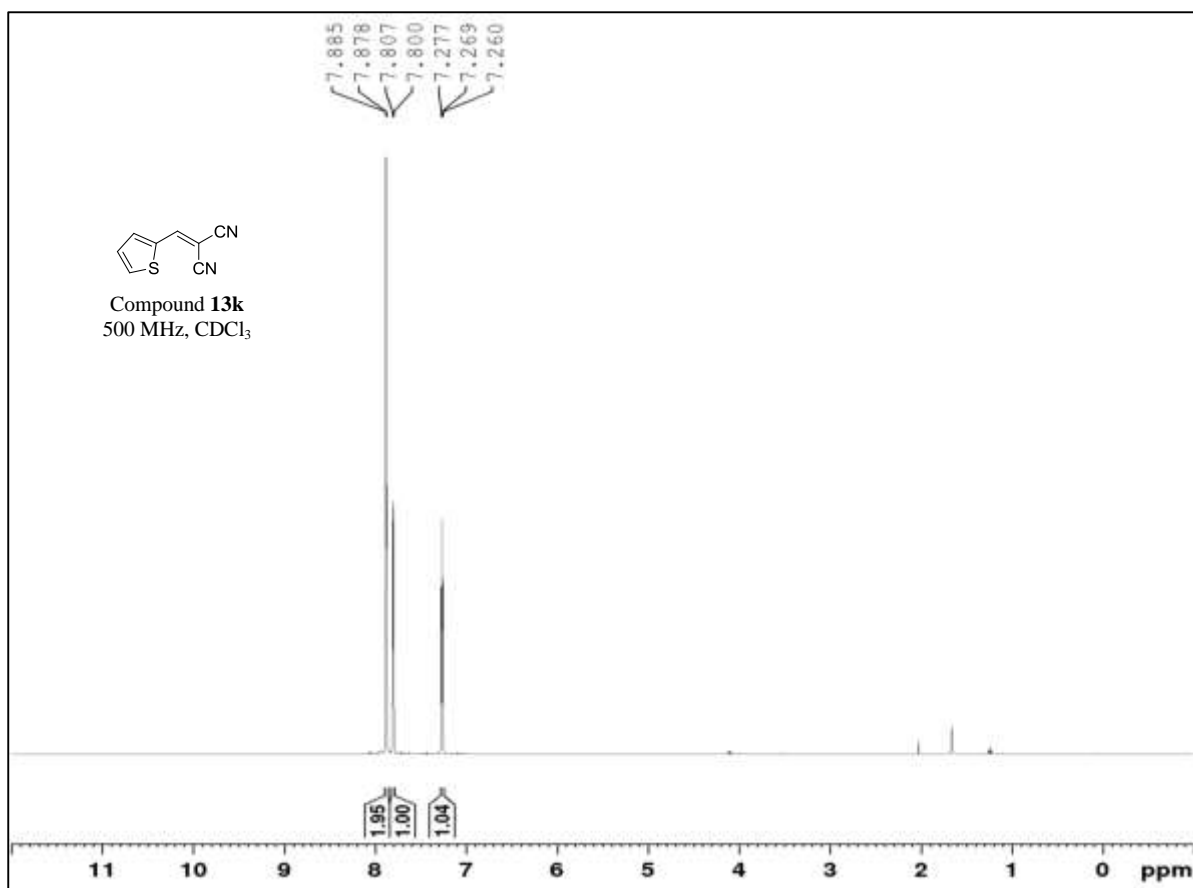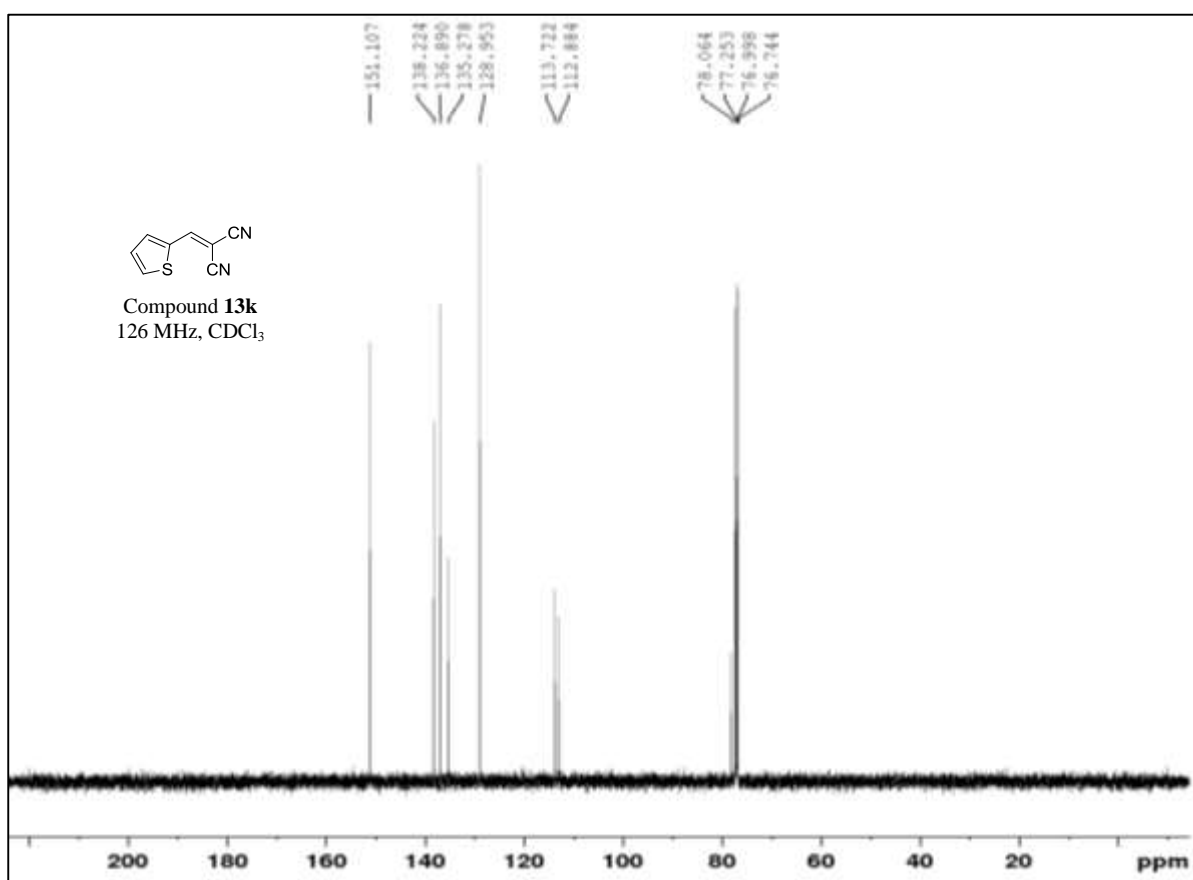

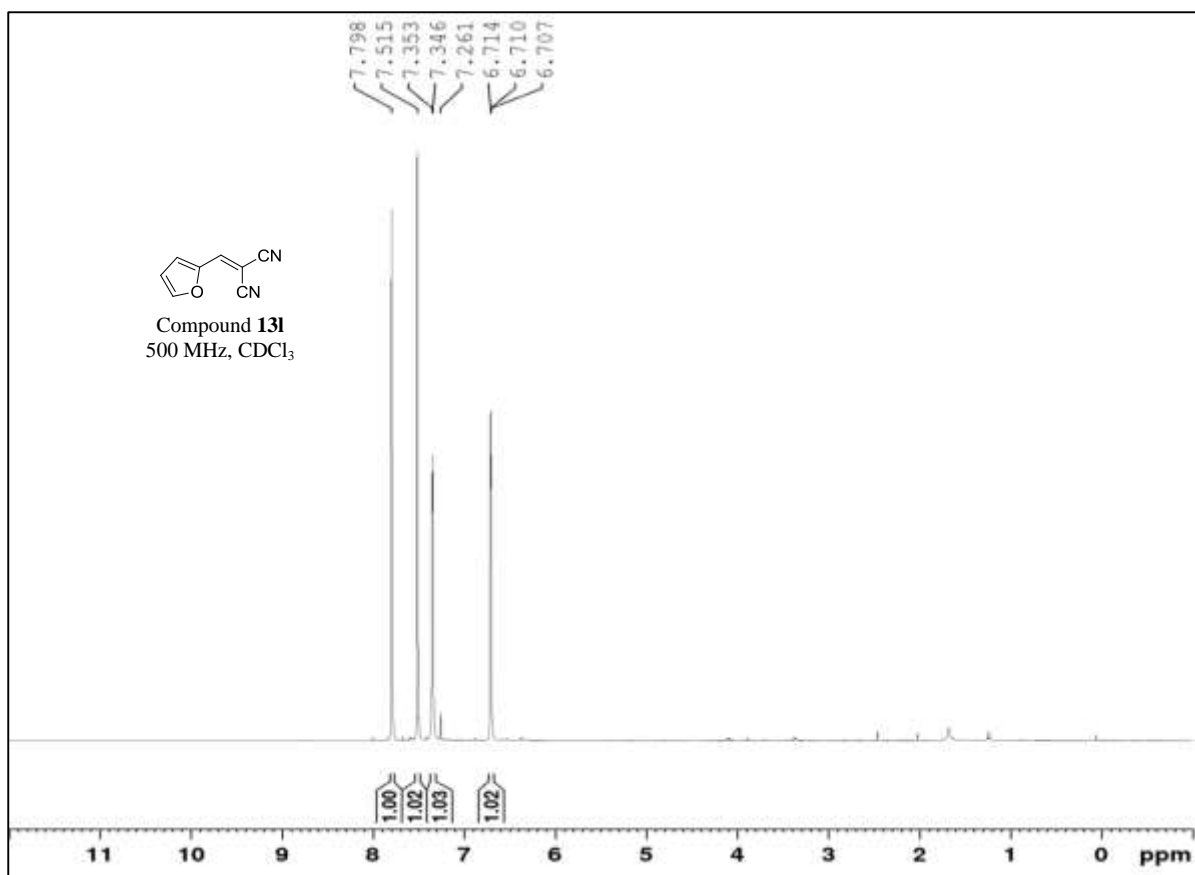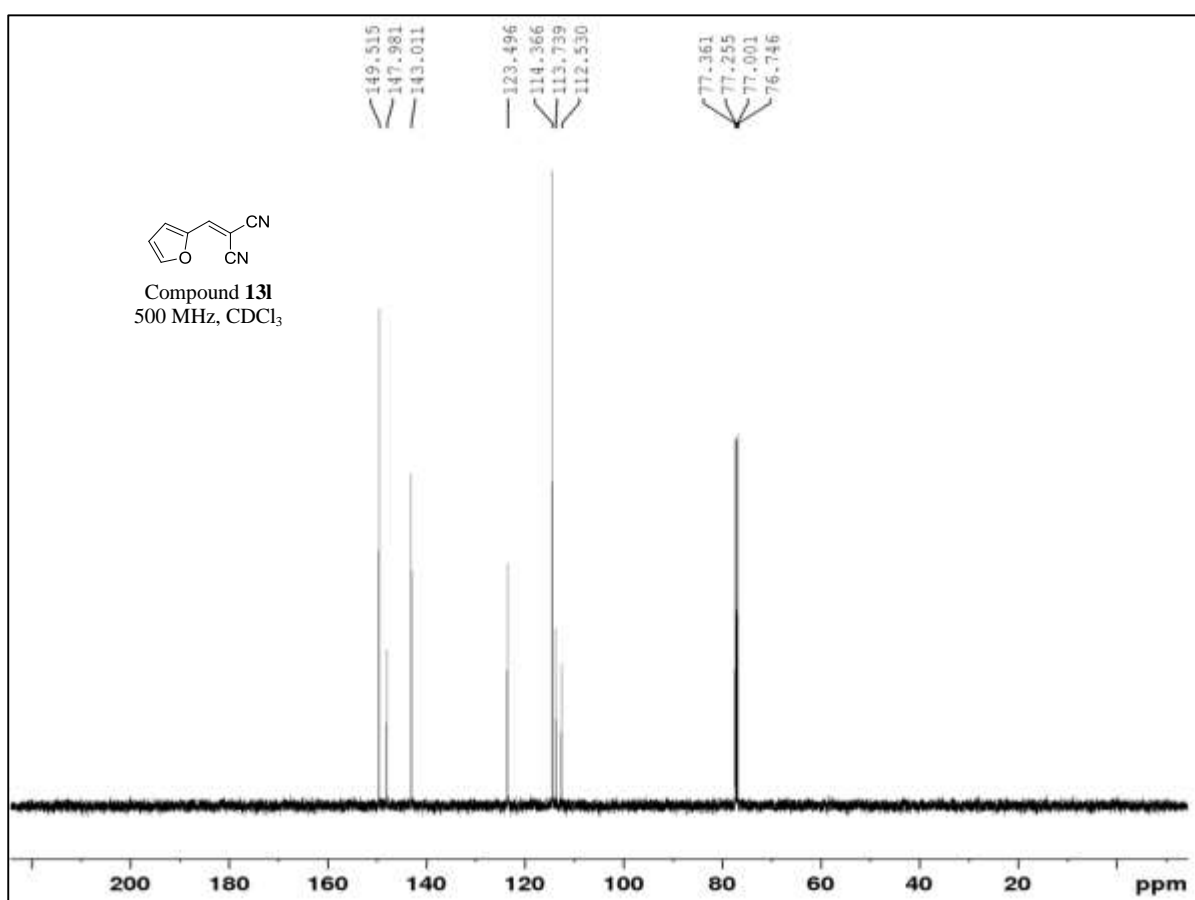

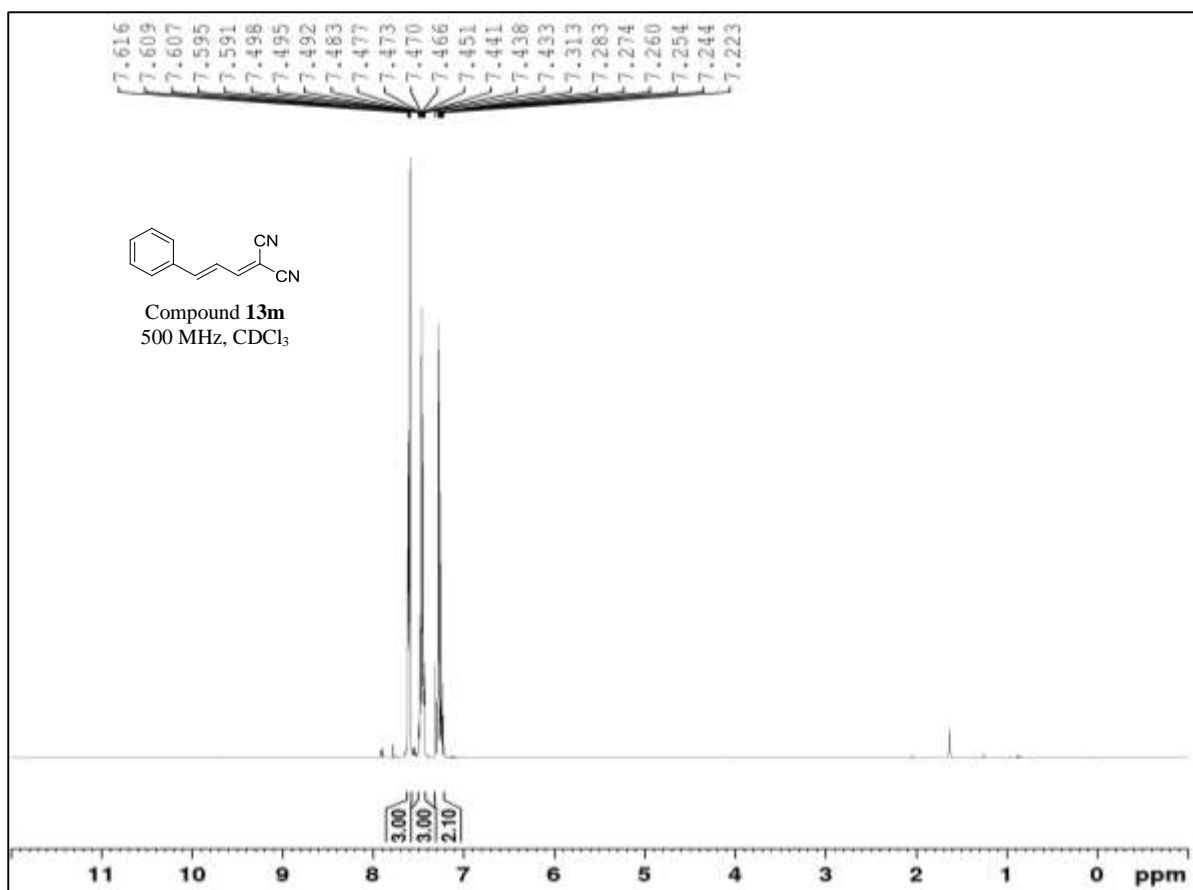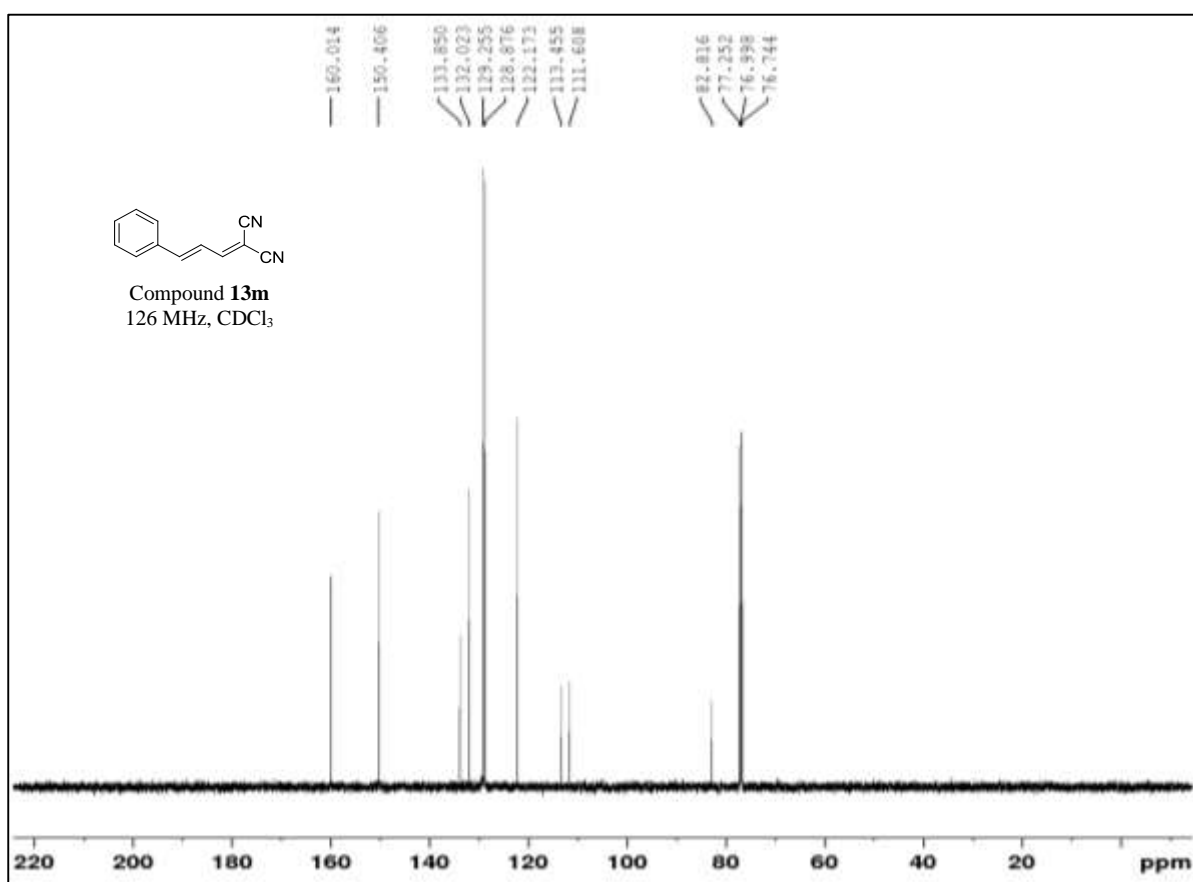



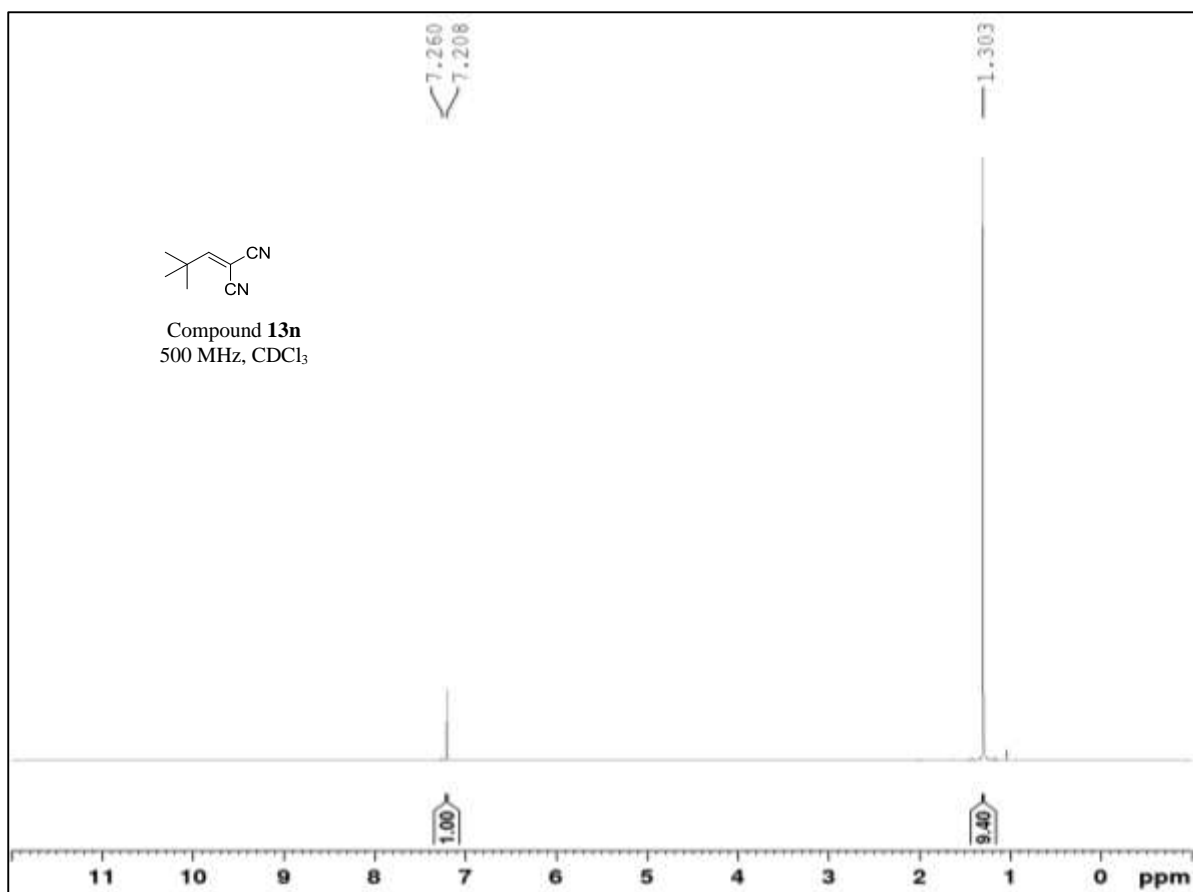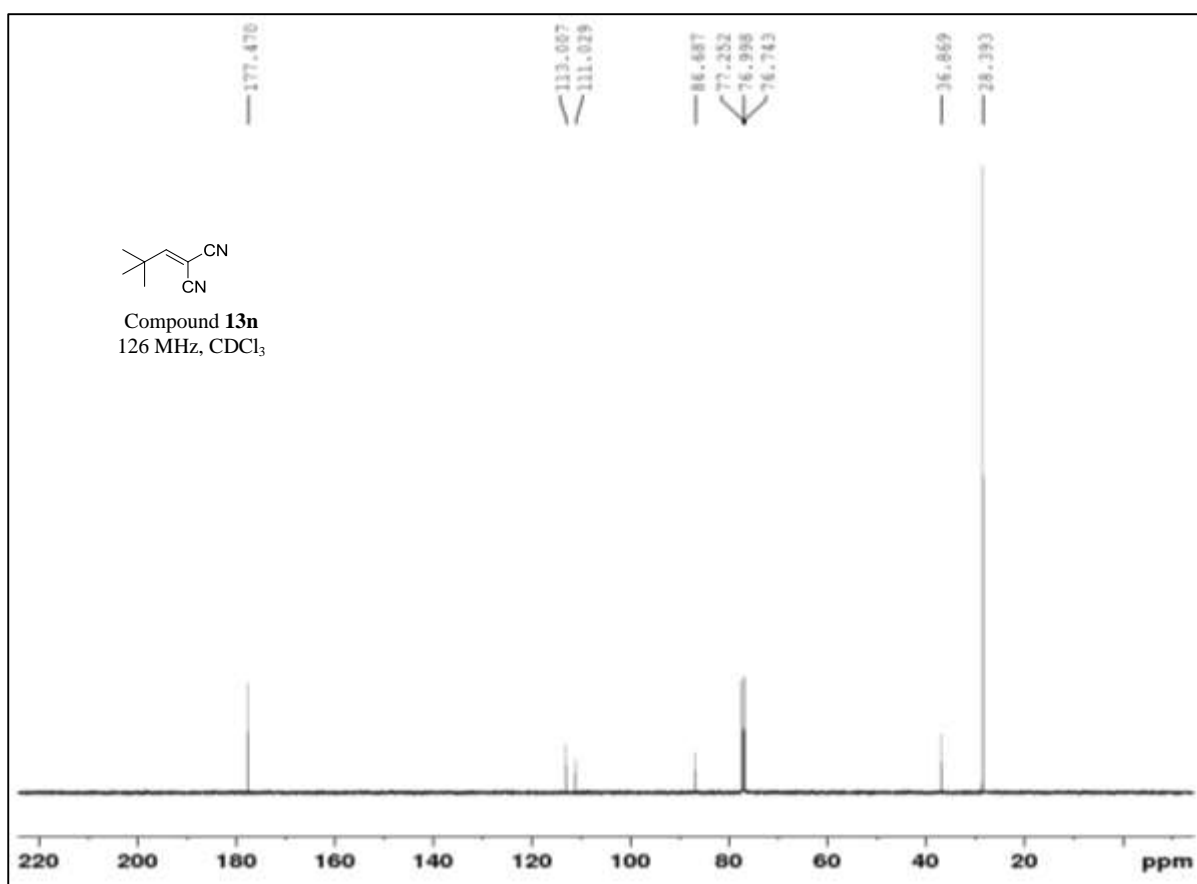

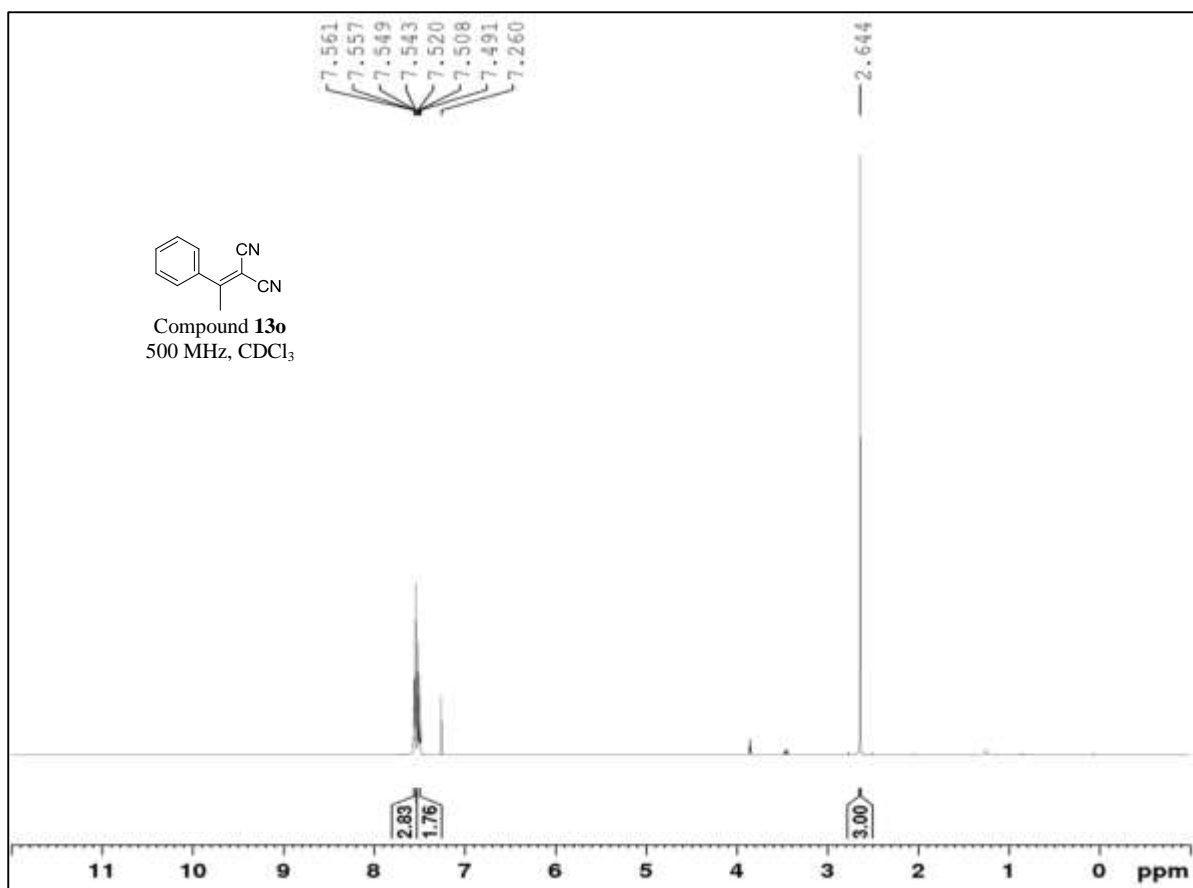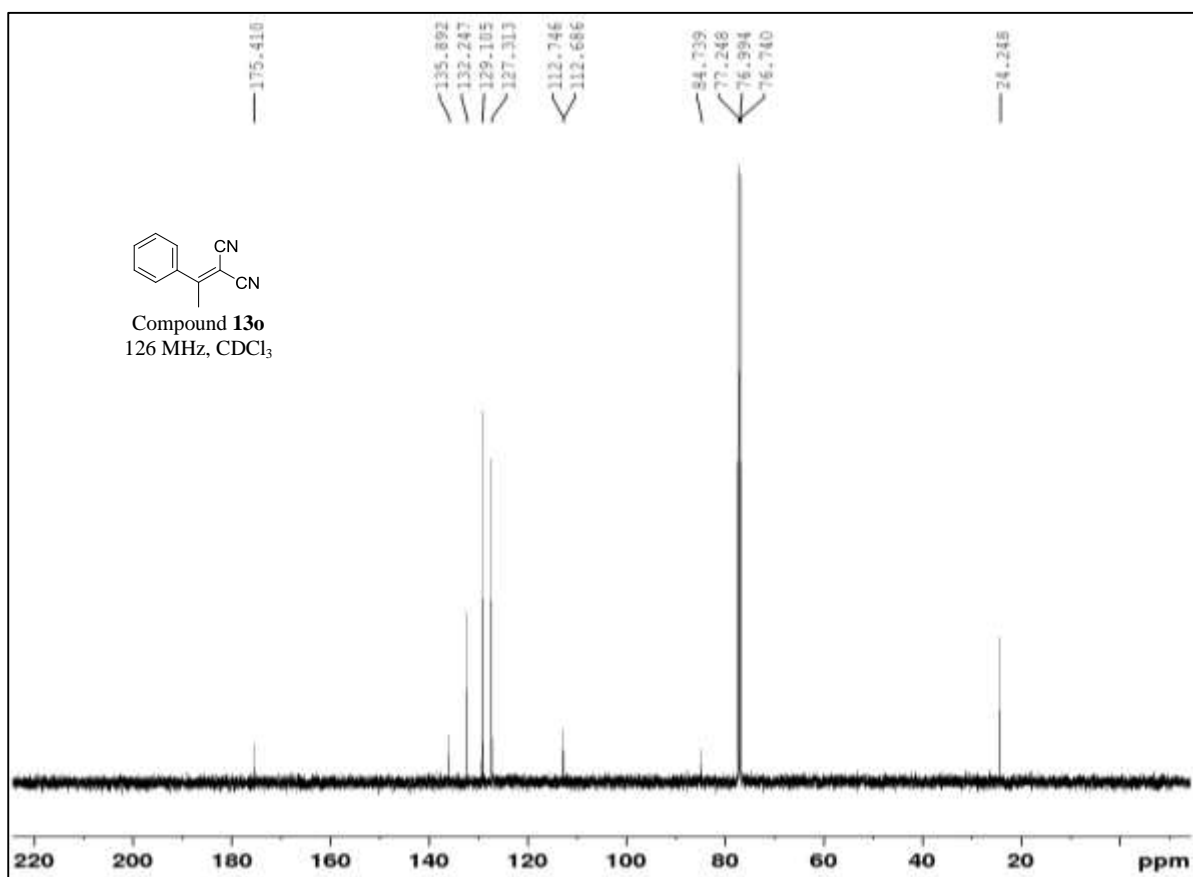

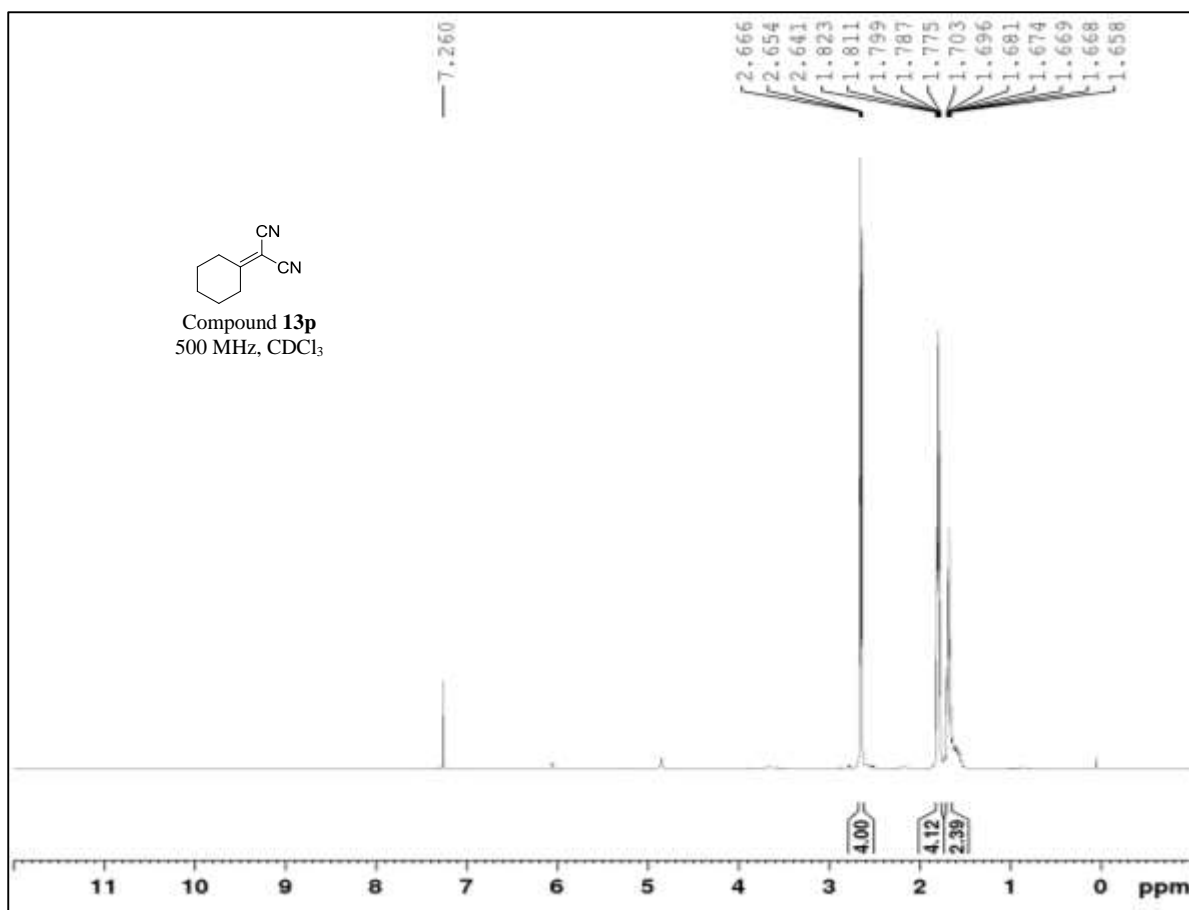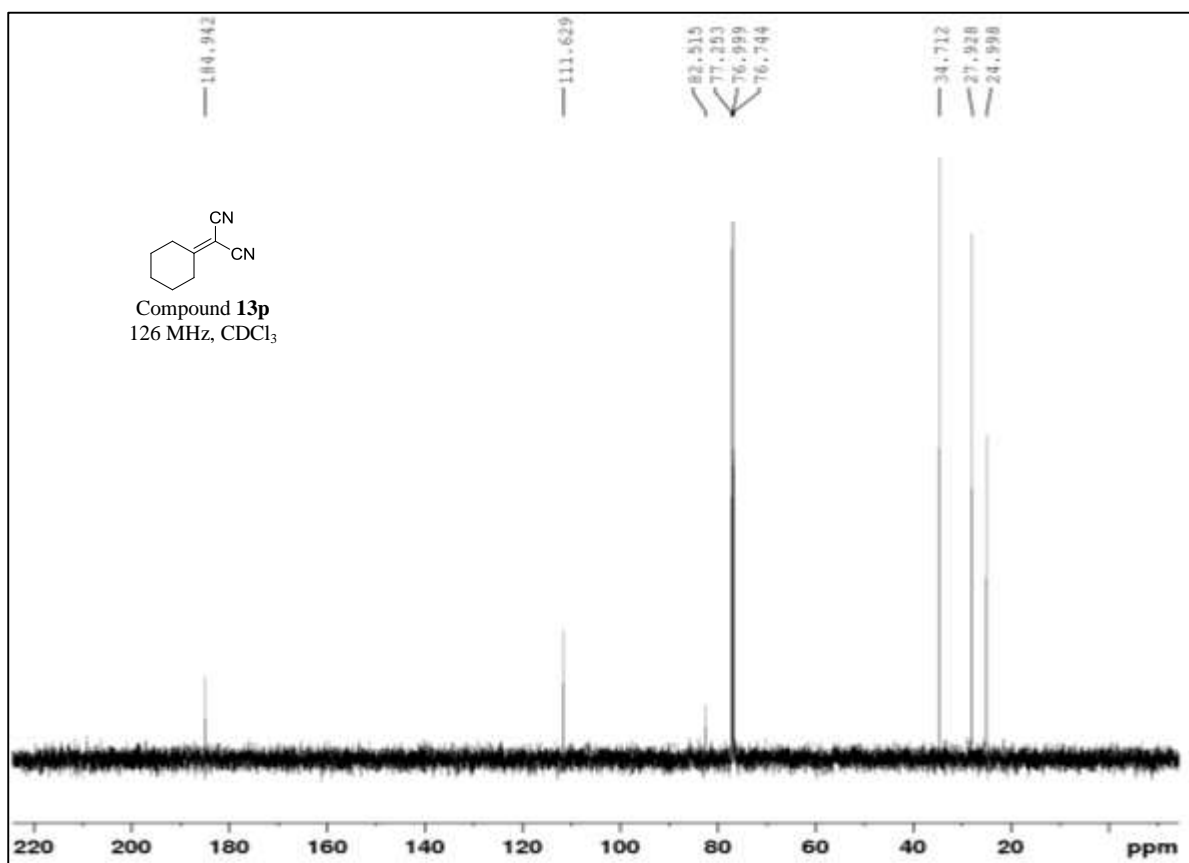

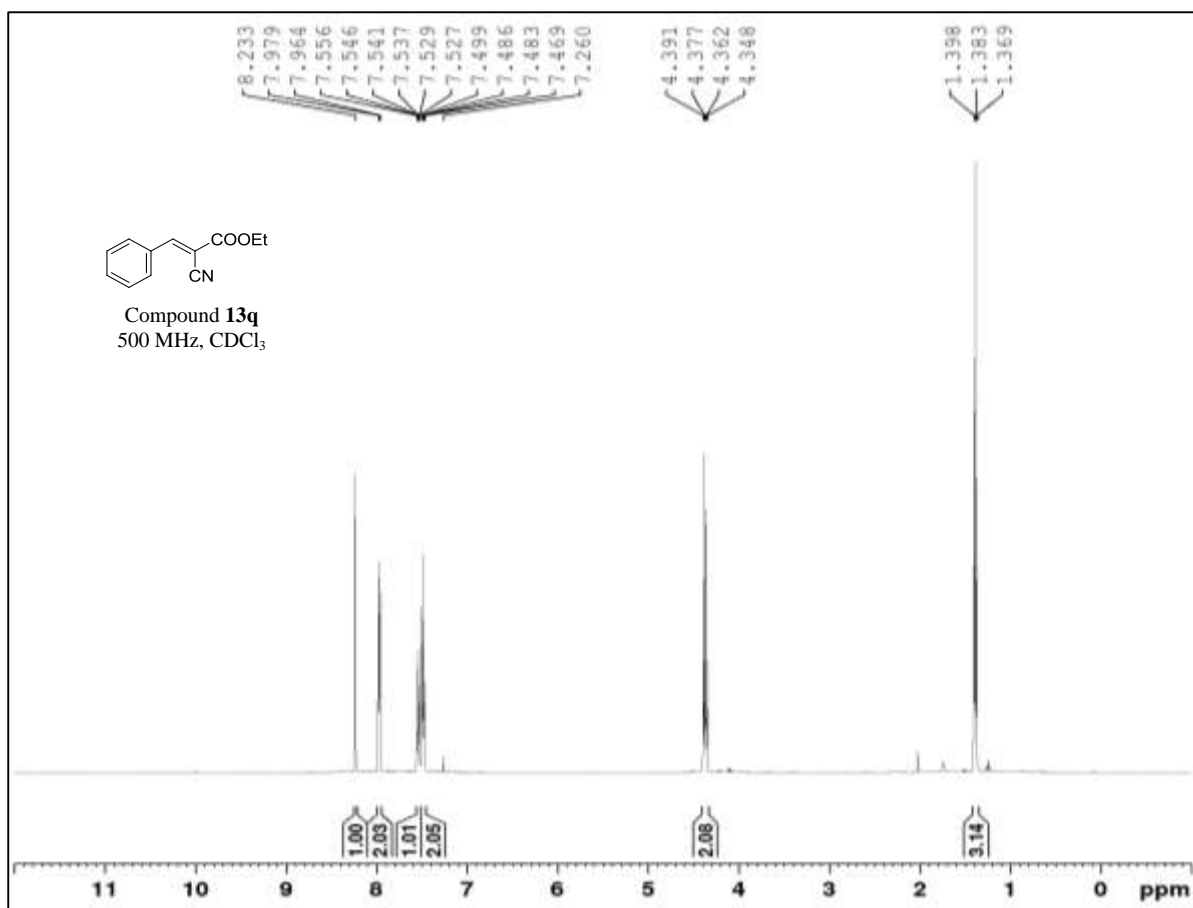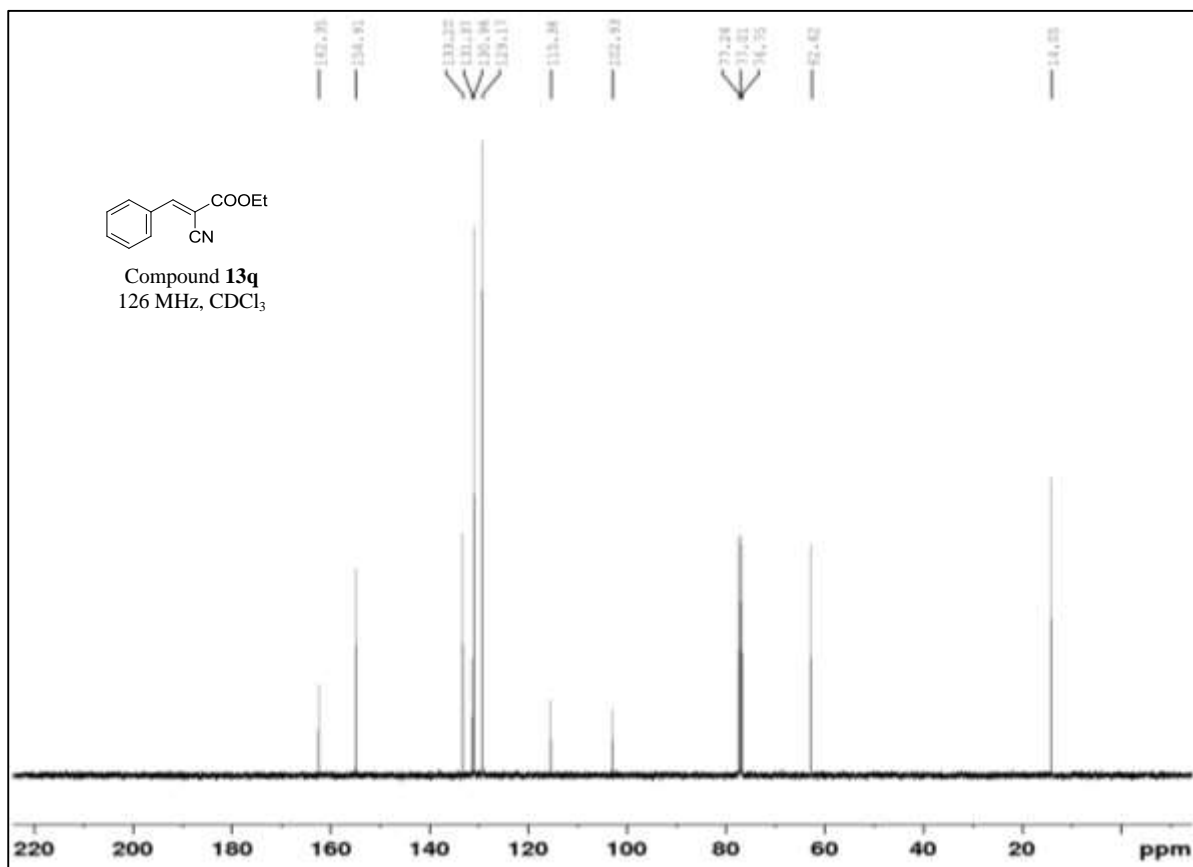

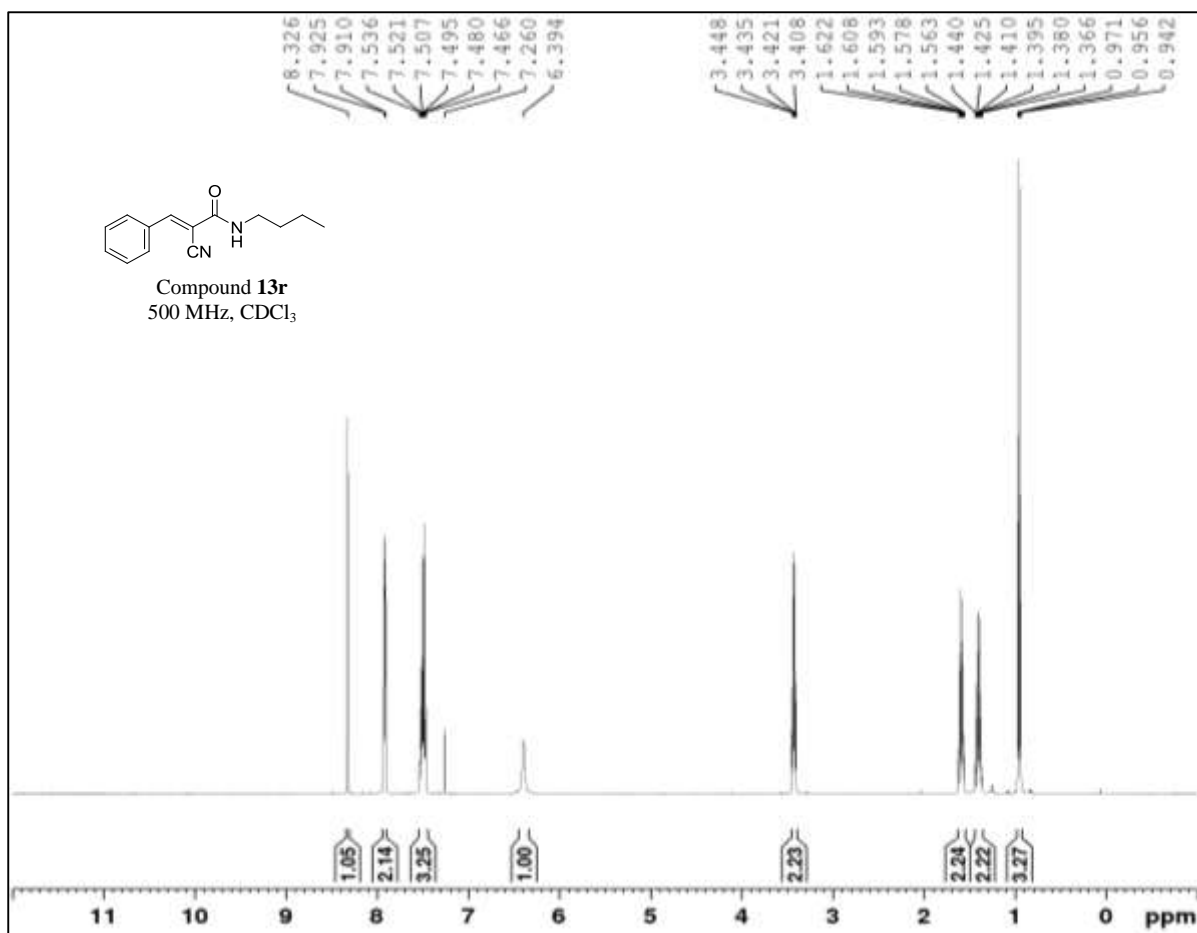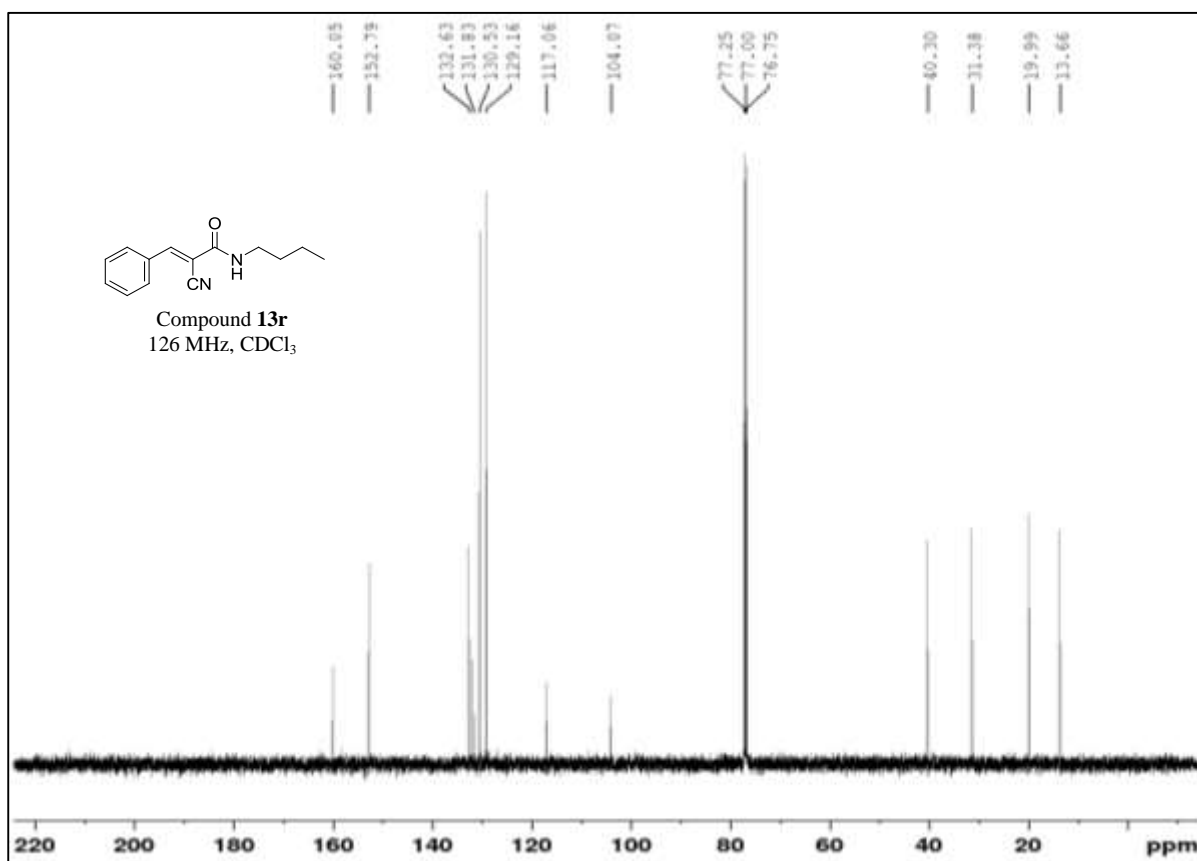

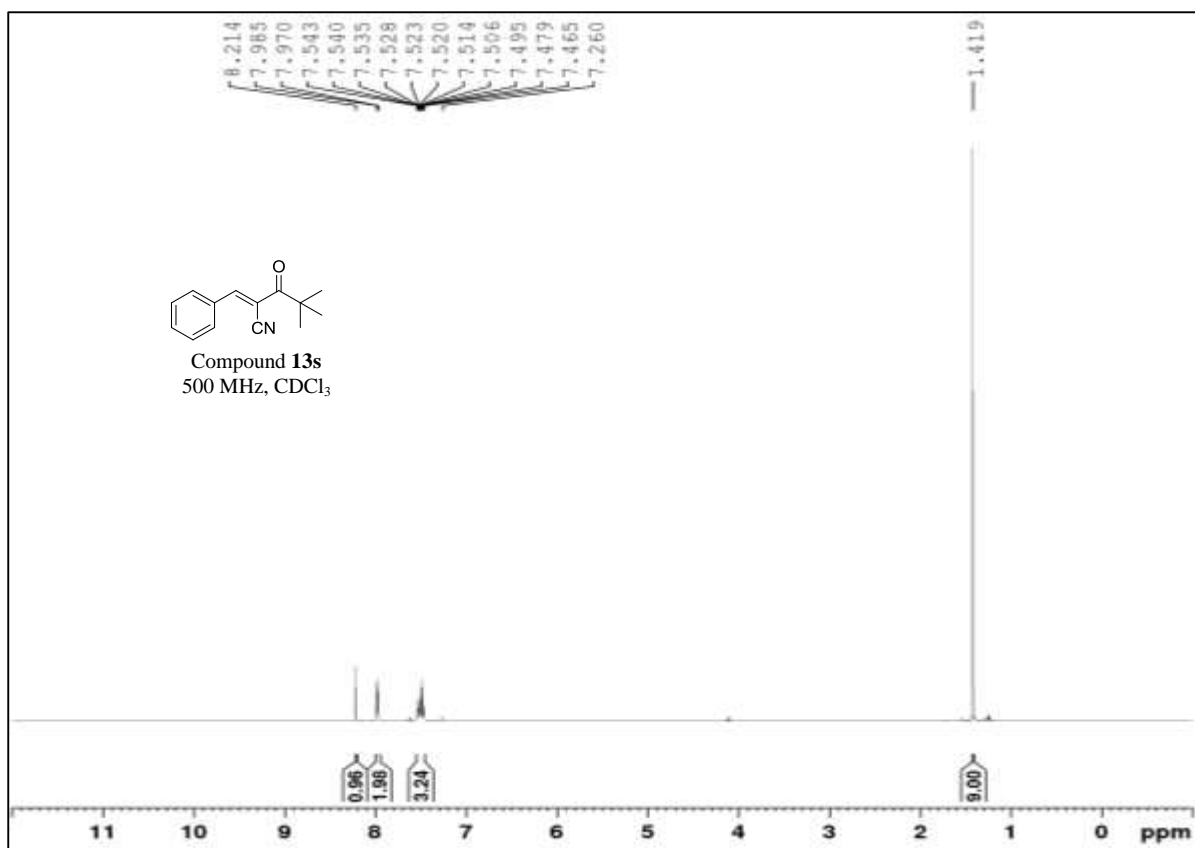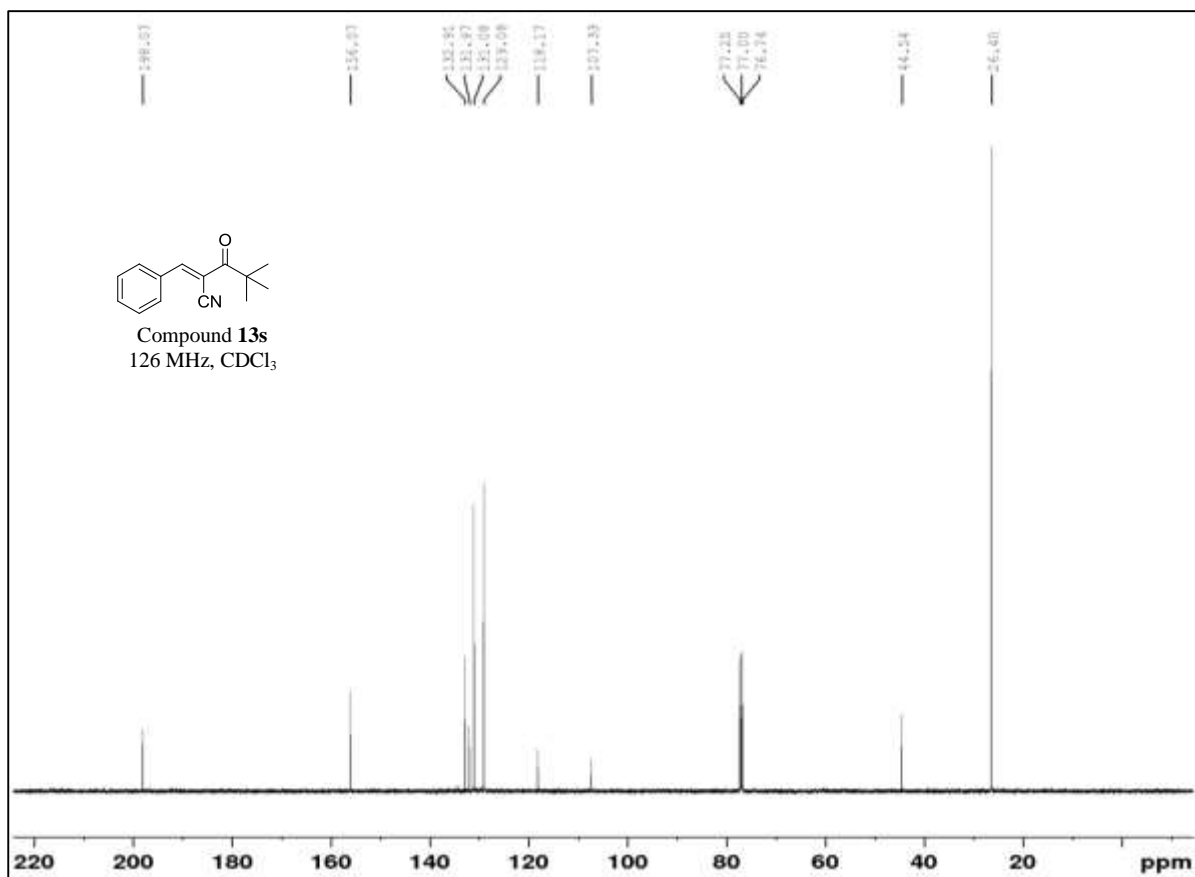

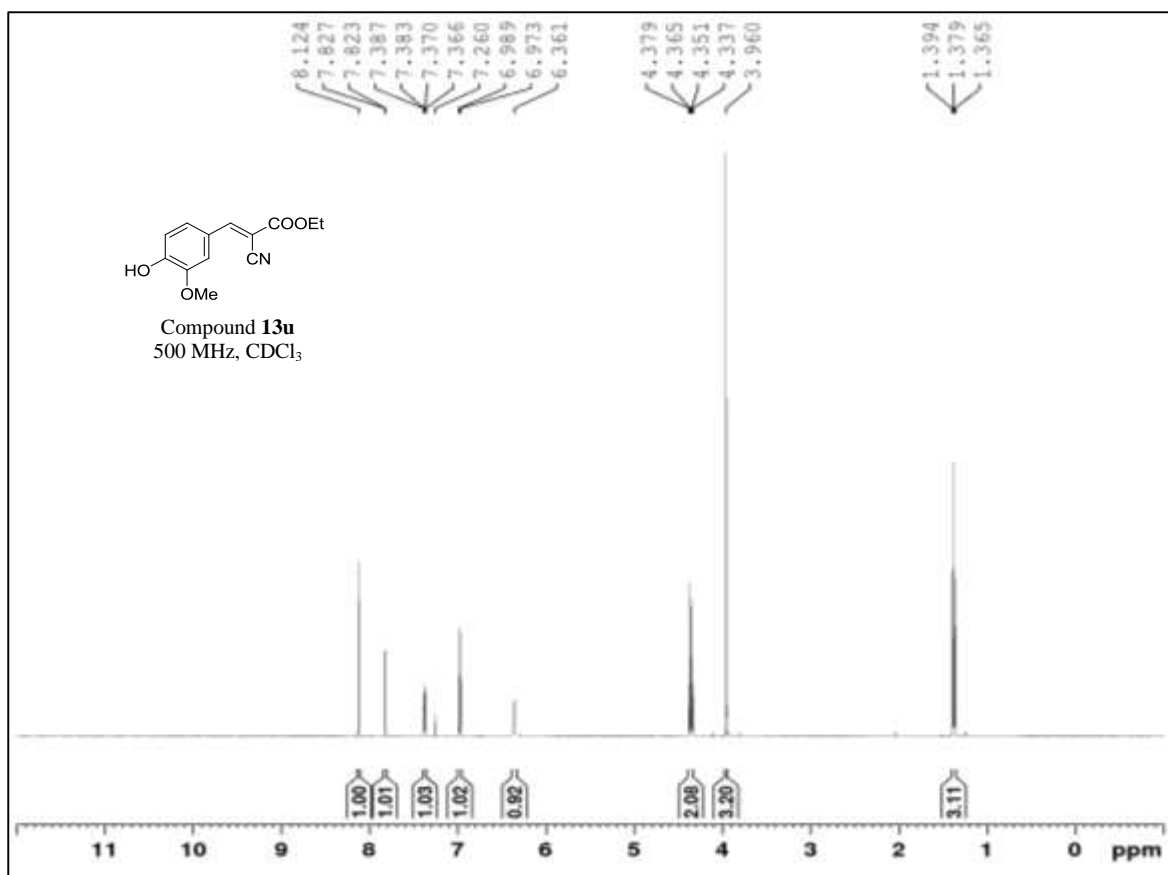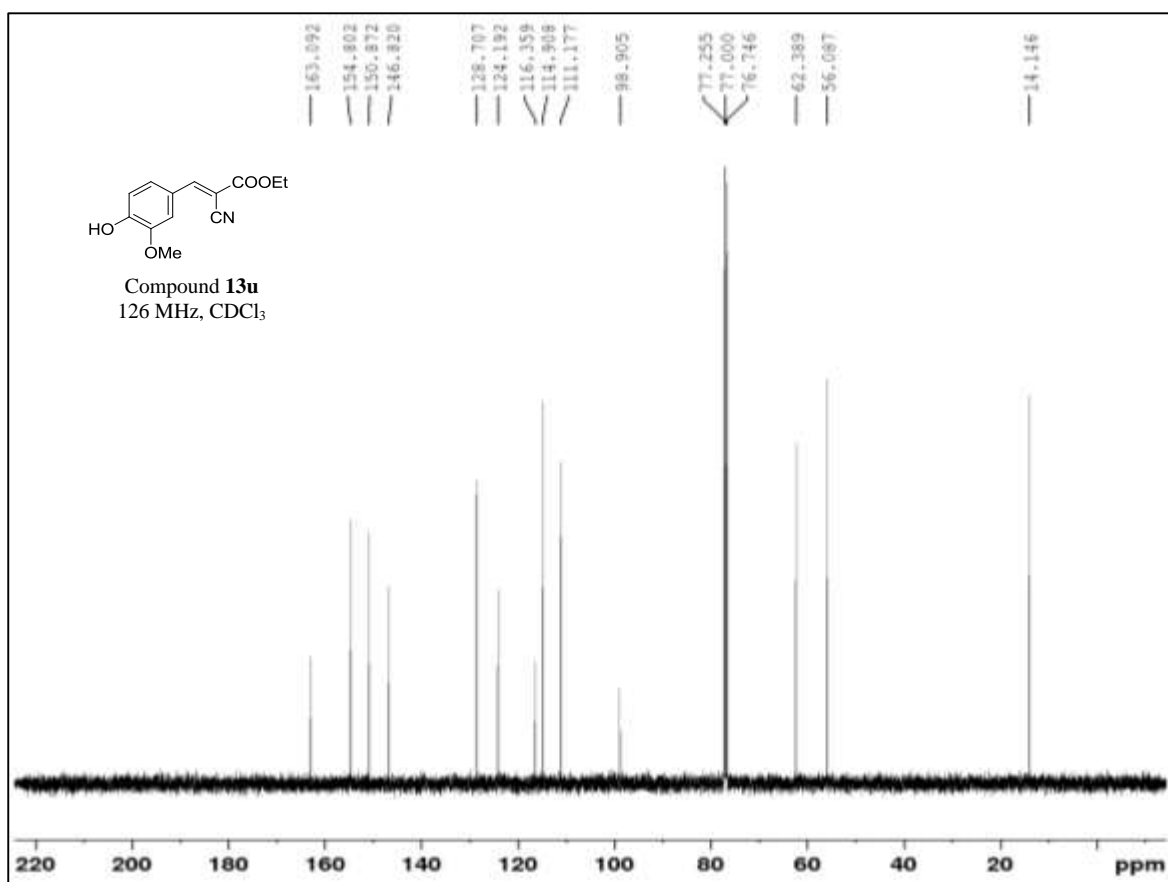

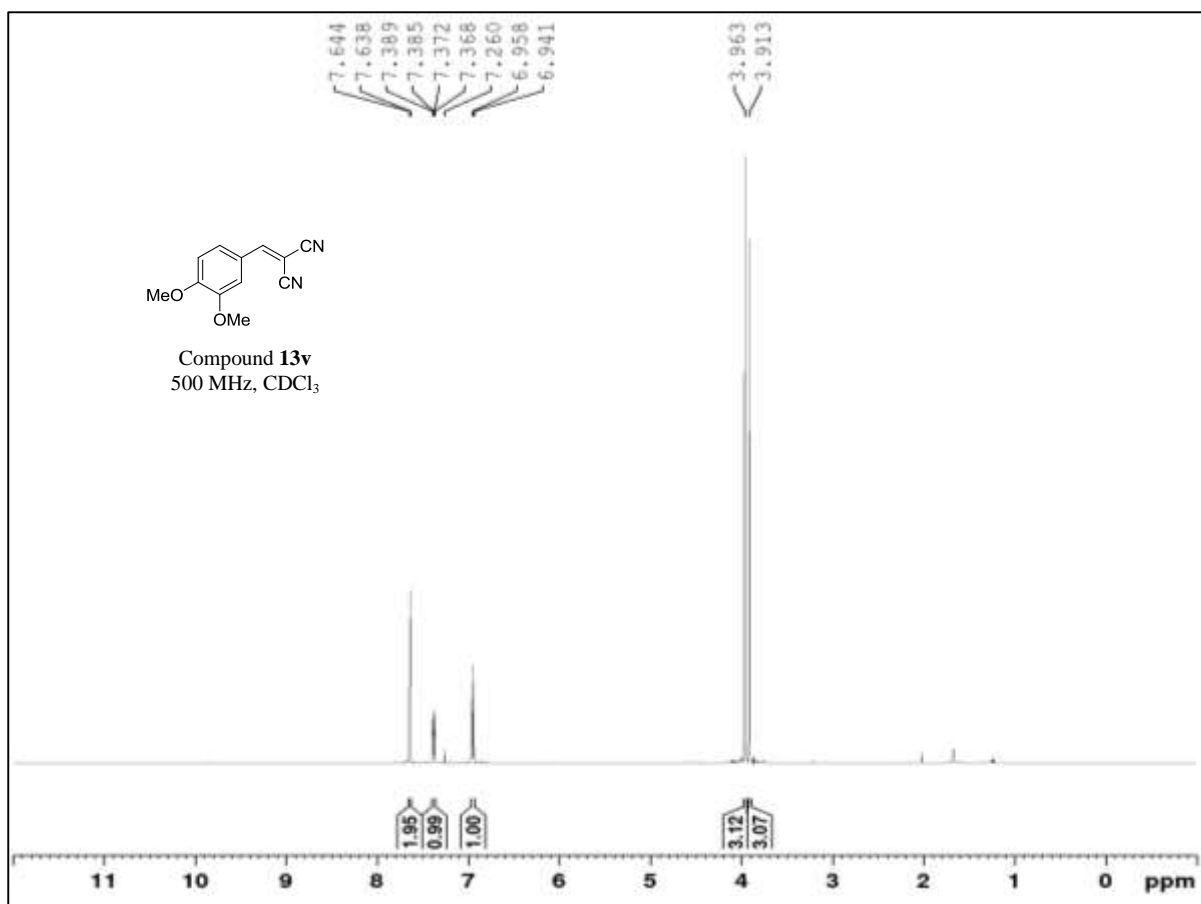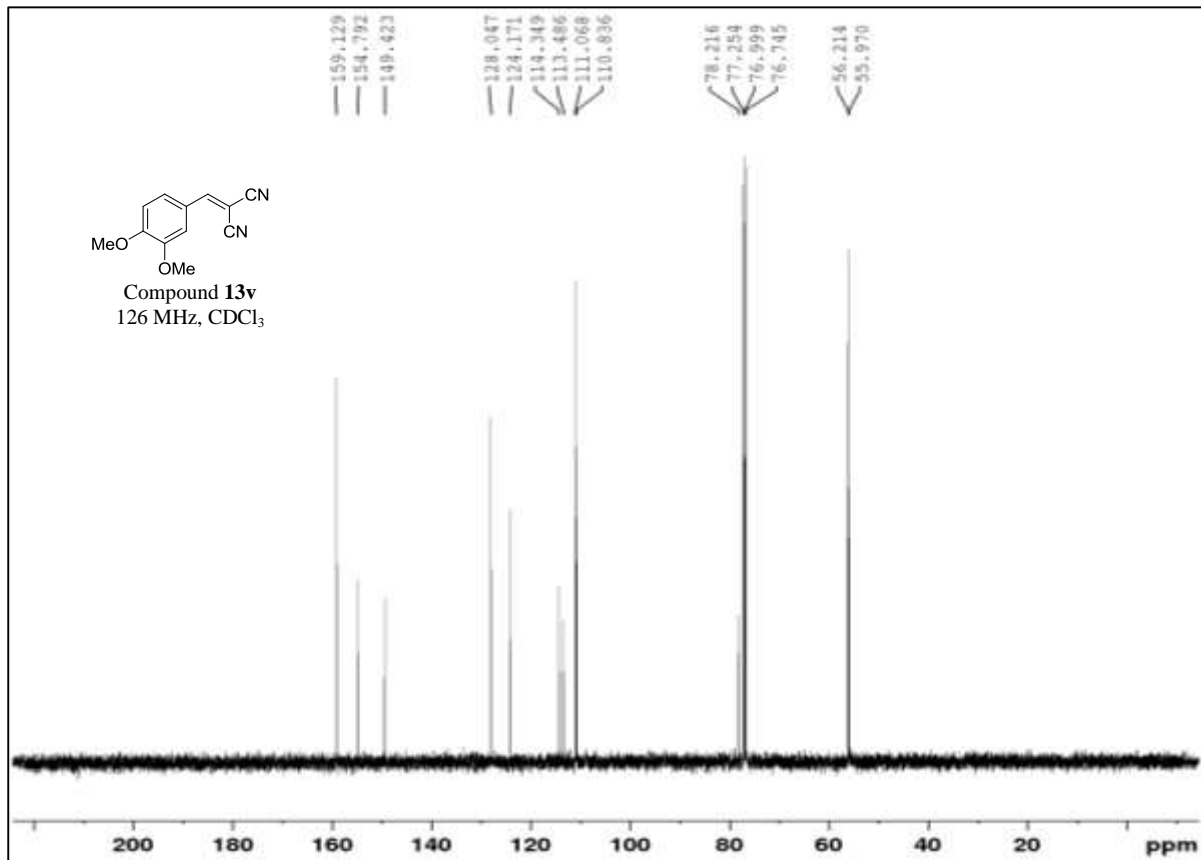



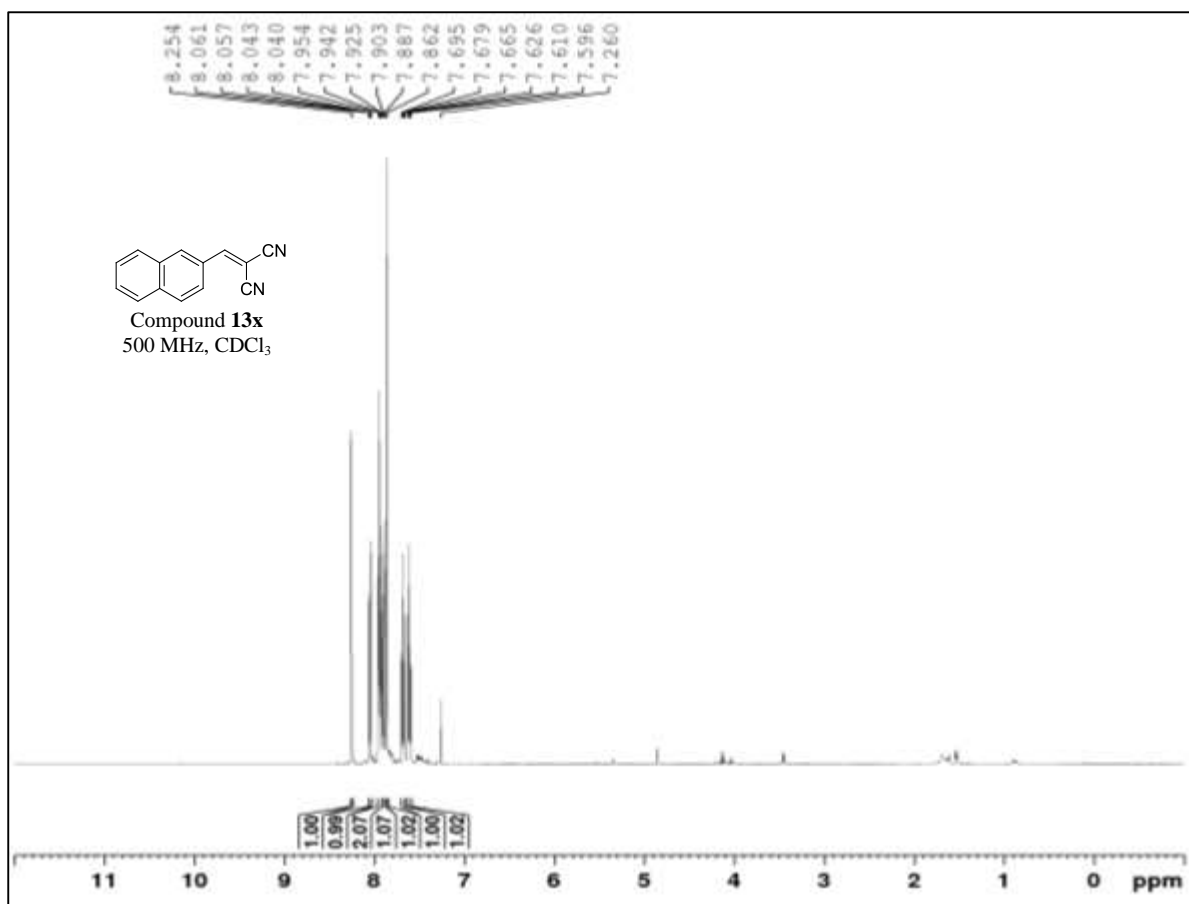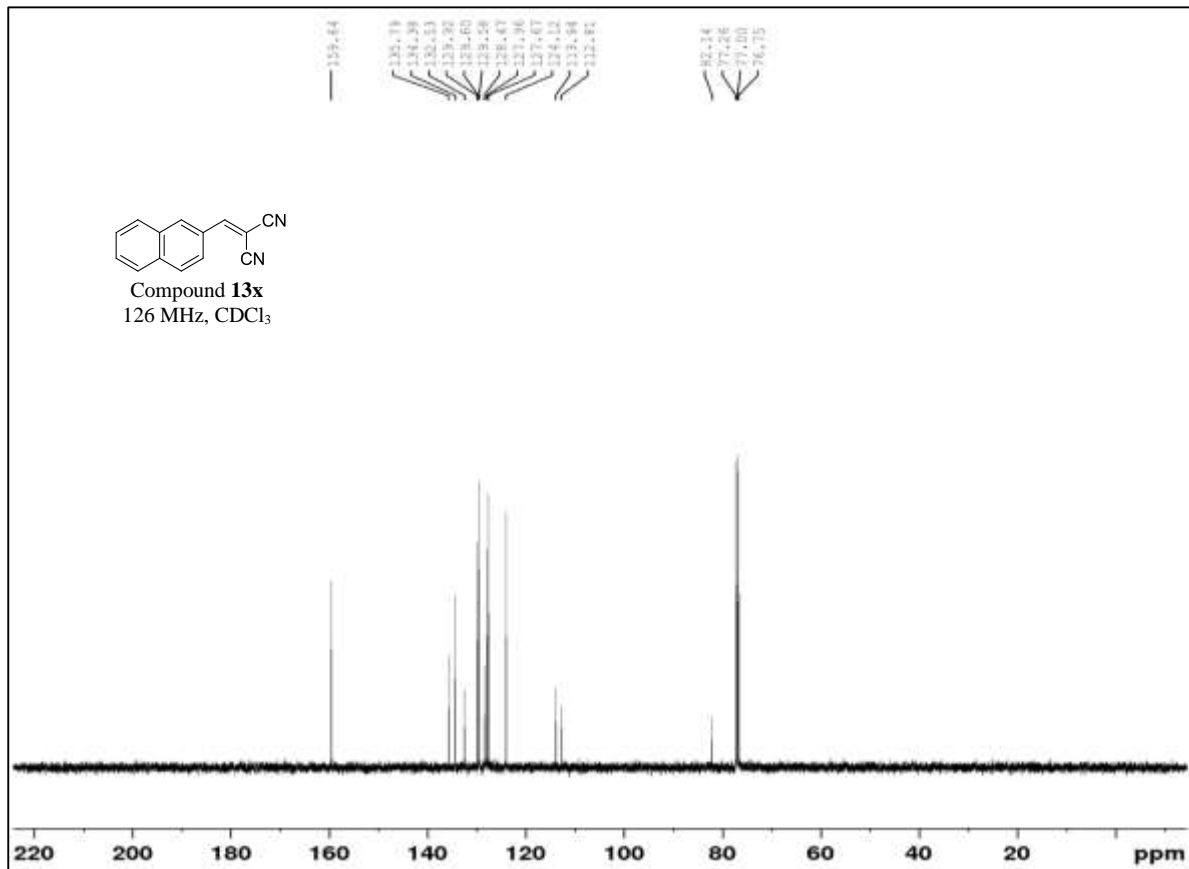

Supplement: c5ra17093a1.pdf [file c5ra17093a1.pdf]
